# Supplementary material for: Global Gene Expression Profiling of Circulating Tumor Cells
Source: Oxford University Press journal article supplement (doi:10.1158/0008-5472.can-04-4330), 2005-06-15
Supplement: 00085472can044330-sup-smirnov_supplementary_table_1.xls [file 00085472can044330-sup-smirnov_supplementary_table_1.xls]

## Sheet: A) Microarray Samples
Patient ID	Gender	Diagnosis Description	Additional Information	Sample Originator	CTC count
JDS007-02	F	Infiltrating lobular and infiltrating ductal carcinoma of the breast	ER positive ; PR negative; HER2 status unknown Stage at diagnosis: 2 Primary Tumor Site: Right Breast	John D, Sprandio, M.D. Delaware County Memorial Hospital	3700
017KB	M	Colorectal Cancer Mucinous Adenocarcinoma	Stage at diagnosis: T3N2M1 Primary Tumor Site: Rectosigmoid	Louis M. Weiner, M.D. Fox Chase Cancer Center	105
JM24	M	Hormone Refractory Prostate Cancer	Stage at blood draw: D3; Bone scan positive	Jose G. Moreno, M.D. Thomas Jefferson University	647

## Sheet: B) Complete Profiles
Affymetrix ID	Gene Name	Gene Symbol	CTC Signal (breast cancer)	CTC Detection (breast cancer)	Depleted Blood Signal (breast cancer)	Depleted Blood Detection (breast cancer)	Fold Difference CTC Signal/Depleted Blood Signal (breast cancer)	CTC Signal (prostate cancer)	CTC Detection (prostate cancer)	Depleted Blood Signal (prostate cancer)	Depleted Blood Detection (prostate cancer)	Fold Difference CTC Signal/Depleted Blood Signal (prostate cancer)	CTC Signal (colon cancer)	CTC Detection (colon cancer)	Depleted Blood Signal (colon cancer)	Depleted Blood Detection (colon cancer)	Fold Difference CTC Signal/Depleted Blood Signal (colon cancer)	Description
1007_s_at	discoidin domain receptor family, member 1	DDR1	893	P	129	A	7	458	P	142	A	3	189	P	160	A	1	Human receptor tyrosine kinase DDR gene, complete cds
1053_at	replication factor C (activator 1) 2, 40kDa	RFC2	73	P	10	A	7	57	P	22	A	3	20	A	43	A	0	Human replication factor C, 40-kDa subunit (A1) mRNA, complete cds
117_at	heat shock 70kDa protein 6 (HSP70B')	HSPA6	52	P	247	P	0	89	P	260	P	0	347	P	187	P	2	Human heat-shock protein HSP70B gene
121_at	paired box gene 8	PAX8	423	P	518	P	1	436	P	601	P	1	224	P	560	P	0	H.sapiens Pax8 mRNA
1255_g_at			9	A	8	A	1	3	A	34	A	0	25	A	45	A	1	Homo sapiens guanylate cyclase activating protein (GCAP) gene exons 1-4, complete cds
1294_at	ubiquitin-activating enzyme E1-like	UBE1L	72	P	295	A	0	72	A	106	A	1	513	P	102	A	5	Homo sapiens ubiquitin-activating enzyme E1 related protein mRNA, complete cds
1316_at	thyroid hormone receptor, alpha (erythroblastic leukemia viral (v-erb-a) oncogene homolog, avian)	THRA	62	P	70	P	1	60	P	120	P	1	38	P	111	P	0	Homo sapiens mRNA for thyroid hormone receptor alpha 1 THRA1, (c-erbA-1 gene)
1320_at	protein tyrosine phosphatase, non-receptor type 21	PTPN21	9	A	10	A	1	8	A	48	A	0	41	A	13	A	3	H.sapiens mRNA for protein-tyrosine-phosphatase D1
1431_at	cytochrome P450, family 2, subfamily E, polypeptide 1	CYP2E1	13	A	44	A	0	21	A	40	A	1	13	A	30	A	0	Human cytochrome P450IIE1 (ethanol-inducible) gene, complete cds
1438_at	EphB3	EPHB3	32	A	13	A	2	21	A	54	A	0	14	A	73	A	0	H.sapiens HEK2 mRNA for protein tyrosine kinase receptor
1487_at	estrogen-related receptor alpha	ESRRA	126	P	182	A	1	191	A	249	A	1	183	M	186	A	1	Human estrogen receptor-related protein (hERRa1) mRNA, 3 end, partial cds
1494_f_at	cytochrome P450, family 2, subfamily A, polypeptide 6	CYP2A6	94	P	140	A	1	108	A	244	A	0	88	P	238	A	0	Human cytochrome P450IIA3 (CYP2A3) mRNA, complete cds
1598_g_at	hypothetical protein MGC5560	MGC5560	59	A	261	A	0	51	A	329	A	0	333	P	366	A	1	Homo sapiens growth-arrest-specific protein (gas) mRNA, complete cds
160020_at	matrix metalloproteinase 14 (membrane-inserted)	MMP14	135	P	168	A	1	126	P	297	P	0	77	M	531	P	0	H.sapiens mRNA for membrane-type matrix metalloproteinase 1
1729_at	TNFRSF1A-associated via death domain	TRADD	177	P	277	P	1	177	P	51	A	3	196	P	166	A	1	Homo sapiens TNF receptor-1 associated protein (TRADD) mRNA, 3 end of cds
177_at	phospholipase D1, phophatidylcholine-specific	PLD1	15	A	12	A	1	38	A	13	A	3	45	A	44	A	1	Human ARF-activated phosphatidylcholine-specific phospholipase D1a (hPLD1) mRNA, complete cds
1773_at	farnesyltransferase, CAAX box, beta	FNTB	18	A	10	A	2	20	A	14	A	1	18	A	11	A	2	Human farnesyl-protein transferase beta-subunit mRNA, complete cds
1861_at	BCL2-antagonist of cell death	BAD	47	A	29	A	2	84	A	36	A	2	2	A	63	A	0	Human Bcl-2 binding component 6 (bbc6) mRNA, complete cds
200000_s_at	PRP8 pre-mRNA processing factor 8 homolog (yeast)	PRPF8	146	P	122	P	1	288	P	145	A	2	526	P	132	A	4	Homo sapiens U5 snRNP-specific protein (220 kD), ortholog of S. cerevisiae Prp8p (PRP8), mRNA.
200001_at	calpain, small subunit 1	CAPNS1	320	P	319	P	1	202	P	372	P	1	303	P	292	M	1	Homo sapiens calpain 4, small subunit (30K) (CAPN4), mRNA.
200002_at	ribosomal protein L35	RPL35	3207	P	629	P	5	5710	P	617	P	9	1458	P	810	P	2	Homo sapiens ribosomal protein L35 (RPL35), mRNA.
200003_s_at	ribosomal protein L28	RPL28	2845	P	1589	P	2	7592	P	1874	P	4	4061	P	1933	P	2	Homo sapiens ribosomal protein L28 (RPL28), mRNA.
200004_at	eukaryotic translation initiation factor 4 gamma, 2	EIF4G2	1716	P	1030	P	2	1419	P	772	P	2	1790	P	868	P	2	Homo sapiens eukaryotic translation initiation factor 4 gamma, 2 (EIF4G2), mRNA.
200005_at	eukaryotic translation initiation factor 3, subunit 7 zeta, 66/67kDa	EIF3S7	1287	P	350	P	4	2143	P	597	P	4	1213	P	566	P	2	Homo sapiens eukaryotic translation initiation factor 3, subunit 7 (zeta, 6667kD) (EIF3S7), mRNA.
200006_at	Parkinson disease (autosomal recessive, early onset) 7	PARK7	2300	P	2330	P	1	6411	P	2223	P	3	3572	P	2208	P	2	Homo sapiens RNA-binding protein regulatory subunit (DJ-1), mRNA.
200007_at	signal recognition particle 14kDa (homologous Alu RNA binding protein)	SRP14	2130	P	1668	P	1	2466	P	1173	P	2	1772	P	1139	P	2	Homo sapiens signal recognition particle 14kD (homologous Alu RNA-binding protein) (SRP14), mRNA.
200008_s_at	GDP dissociation inhibitor 2	GDI2	79	A	78	P	1	162	P	164	P	1	81	P	154	P	1	Human rab GDI mRNA, complete cds.
200009_at	GDP dissociation inhibitor 2	GDI2	1371	P	1082	P	1	2120	P	905	P	2	1848	P	1032	P	2	Homo sapiens GDP dissociation inhibitor 2 (GDI2), mRNA.
200010_at	ribosomal protein L11	RPL11	1243	P	758	P	2	5358	P	1256	P	4	1535	P	1227	P	1	Homo sapiens ribosomal protein L11 (RPL11), mRNA.
200011_s_at	ADP-ribosylation factor 3	ARF3	374	P	319	P	1	389	P	265	P	1	379	P	323	P	1	Homo sapiens ADP-ribosylation factor 3 (ARF3), mRNA.
200012_x_at	ribosomal protein L21	RPL21	3235	P	3933	P	1	6769	P	7298	P	1	3856	P	9864	P	0	Homo sapiens ribosomal protein L21 (gene or pseudogene) (RPL21), mRNA.
200013_at	dipeptidylpeptidase 7	DPP7	2242	P	694	P	3	4990	P	1034	P	5	702	P	895	P	1	Homo sapiens ribosomal protein L24 (RPL24), mRNA.
200014_s_at	heterogeneous nuclear ribonucleoprotein C (C1/C2)	HNRPC	834	P	483	P	2	794	P	360	P	2	726	P	467	P	2	Homo sapiens heterogeneous nuclear ribonucleoprotein C (C1C2) (HNRPC), mRNA.
200015_s_at	neural precursor cell expressed, developmentally down-regulated 5	NEDD5	1444	P	686	P	2	1130	P	335	P	3	1225	P	489	P	3	Homo sapiens neural precursor cell expressed, developmentally down-regulated 5 (NEDD5), mRNA.
200016_x_at	heterogeneous nuclear ribonucleoprotein A1	HNRPA1	4192	P	2741	P	2	4465	P	3421	P	1	3781	P	3157	P	1	Homo sapiens heterogeneous nuclear ribonucleoprotein A1 (HNRPA1), mRNA.
200017_at	ribosomal protein S27a	RPS27A	1495	P	1218	P	1	1904	P	1236	P	2	1363	P	799	P	2	Homo sapiens ribosomal protein S27a (RPS27A), mRNA.
200018_at	ribosomal protein S13	RPS13	3753	P	3186	P	1	7727	P	6699	P	1	4600	P	3704	P	1	Homo sapiens ribosomal protein S13 (RPS13), mRNA.
200019_s_at	Finkel-Biskis-Reilly murine sarcoma virus (FBR-MuSV) ubiquitously expressed (fox derived); ribosomal protein S30	FAU	8427	P	5020	P	2	11541	P	6121	P	2	9423	P	6066	P	2	Homo sapiens Finkel-Biskis-Reilly murine sarcoma virus (FBR-MuSV) ubiquitously expressed (fox derived); ribosomal protein S30 (FAU), mRNA.
200020_at	TAR DNA binding protein	TARDBP	578	P	323	P	2	687	P	243	P	3	683	P	257	P	3	Homo sapiens TAR DNA binding protein (TARDBP), mRNA.
200021_at	cofilin 1 (non-muscle)	CFL1	8078	P	10073	P	1	6888	P	10265	P	1	9080	P	8766	P	1	Homo sapiens cofilin 1 (non-muscle) (CFL1), mRNA.
200022_at	ribosomal protein L18	RPL18	3076	P	1344	P	2	8636	P	1403	P	6	2287	P	1551	P	1	Homo sapiens ribosomal protein L18 (RPL18), mRNA.
200023_s_at	eukaryotic translation initiation factor 3, subunit 5 epsilon, 47kDa	EIF3S5	978	P	375	P	3	1203	P	588	P	2	1534	P	562	P	3	Homo sapiens eukaryotic translation initiation factor 3, subunit 5 (epsilon, 47kD) (EIF3S5), mRNA.
200024_at	ribosomal protein S5	RPS5	2209	P	638	P	3	7212	P	1540	P	5	1086	P	866	P	1	Homo sapiens ribosomal protein S5 (RPS5), mRNA.
200025_s_at	ribosomal protein L27	RPL27	6720	P	3920	P	2	9901	P	4339	P	2	5805	P	4216	P	1	Homo sapiens ribosomal protein L27 (RPL27), mRNA.
200026_at	ribosomal protein L34	RPL34	3761	P	2121	P	2	4838	P	2452	P	2	4580	P	2682	P	2	Homo sapiens ribosomal protein L34 (RPL34), mRNA.
200027_at	asparaginyl-tRNA synthetase	NARS	1218	P	694	P	2	1735	P	465	P	4	1386	P	625	P	2	Homo sapiens asparaginyl-tRNA synthetase (NARS), mRNA.
200028_s_at	START domain containing 7	STARD7	759	P	542	P	1	730	P	533	P	1	908	P	437	P	2	Homo sapiens GTT1 protein (GTT1), mRNA.
200029_at	ribosomal protein L19	RPL19	3603	P	1181	P	3	9570	P	2133	P	4	4004	P	1830	P	2	Homo sapiens ribosomal protein L19 (RPL19), mRNA.
200030_s_at	solute carrier family 25 (mitochondrial carrier; phosphate carrier), member 3	SLC25A3	1392	P	482	P	3	2999	P	1093	P	3	2030	P	1243	P	2	Homo sapiens solute carrier family 25 (mitochondrial carrier; phosphate carrier), member 3 (SLC25A3), nuclear gene encoding mitochondrial protein, transcript variant 1b, mRNA.
200031_s_at	ribosomal protein S11	RPS11	7264	P	5978	P	1	14592	P	13404	P	1	6634	P	7559	P	1	Homo sapiens ribosomal protein S11 (RPS11), mRNA.
200032_s_at	ribosomal protein L9	RPL9	3358	P	2694	P	1	6430	P	3043	P	2	2436	P	3122	P	1	Homo sapiens ribosomal protein L9 (RPL9), mRNA.
200033_at	DEAD/H (Asp-Glu-Ala-Asp/His) box polypeptide 5 (RNA helicase, 68kDa)	DDX5	2110	P	1909	P	1	1168	P	1904	P	1	1556	P	1443	P	1	Homo sapiens DEADH (Asp-Glu-Ala-AspHis) box polypeptide 5 (RNA helicase, 68kD) (DDX5), mRNA.
200034_s_at	ribosomal protein L6	RPL6	2206	P	778	P	3	5046	P	1350	P	4	3012	P	1330	P	2	Homo sapiens ribosomal protein L6 (RPL6), mRNA.
200035_at	likely ortholog of Xenopus dullard	HSA011916	108	P	236	A	0	168	P	181	A	1	194	P	164	A	1	Homo sapiens hypothetical protein (HSA011916), mRNA.
200036_s_at	ribosomal protein L10a	RPL10A	2449	P	368	P	7	3902	P	320	P	12	1175	P	620	P	2	Homo sapiens ribosomal protein L10a (RPL10A), mRNA.
200037_s_at	chromobox homolog 3 (HP1 gamma homolog, Drosophila)	CBX3	1296	P	1191	P	1	919	P	756	P	1	814	P	718	P	1	Homo sapiens heterochromatin-like protein 1 (HECH), mRNA.
200038_s_at	ribosomal protein L17	RPL17	3174	P	2299	P	1	6102	P	3347	P	2	4057	P	3421	P	1	Homo sapiens ribosomal protein L17 (RPL17), mRNA.
200039_s_at	proteasome (prosome, macropain) subunit, beta type, 2	PSMB2	452	P	393	P	1	1099	P	380	P	3	548	P	366	P	1	Homo sapiens proteasome (prosome, macropain) subunit, beta type, 2 (PSMB2), mRNA.
200040_at	KH domain containing, RNA binding, signal transduction associated 1	KHDRBS1	702	P	648	P	1	584	P	383	P	2	1057	P	400	P	3	Homo sapiens GAP-associated tyrosine phosphoprotein p62 (Sam68) (SAM68), mRNA.
200041_s_at	HLA-B associated transcript 1	BAT1	797	P	296	P	3	318	P	169	P	2	748	P	228	P	3	Homo sapiens HLA-B associated transcript-1 (D6S81E), mRNA.
200042_at	hypothetical protein HSPC117	HSPC117	504	P	432	P	1	589	P	350	M	2	427	P	424	M	1	Homo sapiens hypothetical protein (HSPC117), mRNA.
200043_at	enhancer of rudimentary homolog (Drosophila)	ERH	556	P	352	P	2	416	P	174	P	2	237	P	168	P	1	Homo sapiens enhancer of rudimentary (Drosophila) homolog (ERH), mRNA.
200044_at	splicing factor, arginine/serine-rich 9	SFRS9	583	P	258	P	2	638	P	227	P	3	590	P	214	P	3	Homo sapiens splicing factor, arginineserine-rich 9 (SFRS9), mRNA.
200045_at	ATP-binding cassette, sub-family F (GCN20), member 1	ABCF1	799	P	399	P	2	437	P	340	P	1	357	P	287	P	1	Homo sapiens ATP-binding cassette, sub-family F (GCN20), member 1 (ABCF1), mRNA.
200046_at	defender against cell death 1	DAD1	762	P	430	P	2	810	P	487	P	2	533	P	753	P	1	Homo sapiens defender against cell death 1 (DAD1), mRNA.
200047_s_at	YY1 transcription factor	YY1	425	P	369	P	1	279	P	250	P	1	449	P	266	P	2	Homo sapiens YY1 transcription factor (YY1), mRNA.
200048_s_at	jumping translocation breakpoint	JTB	2158	P	779	P	3	1424	P	1278	P	1	800	P	933	P	1	Homo sapiens jumping translocation breakpoint (JTB), mRNA.
200049_at	histone acetyltransferase	HBOA	83	P	111	M	1	75	P	165	P	0	58	P	222	P	0	Homo sapiens histone acetyltransferase (HBOA), mRNA.
200050_at	zinc finger protein 146	ZNF146	427	P	255	P	2	312	P	298	P	1	165	P	262	P	1	Homo sapiens zinc finger protein 146 (ZNF146), mRNA.
200051_at	squamous cell carcinoma antigen recognised by T cells	SART1	180	P	93	P	2	116	P	104	A	1	246	P	164	P	1	Homo sapiens squamous cell carcinoma antigen recognised by T cells (SART1), mRNA.
200052_s_at	interleukin enhancer binding factor 2, 45kDa	ILF2	387	P	97	A	4	648	P	128	P	5	156	P	68	P	2	Homo sapiens interleukin enhancer binding factor 2, 45kD (ILF2), mRNA.
200053_at	sperm associated antigen 7	SPAG7	287	P	208	P	1	482	P	203	P	2	210	P	231	P	1	Homo sapiens sperm associated antigen 7 (SPAG7), mRNA.
200054_at	zinc finger protein 259	ZNF259	79	P	161	P	0	125	M	103	A	1	185	P	189	A	1	Homo sapiens zinc finger protein 259 (ZNF259), mRNA.
200055_at	TAF10 RNA polymerase II, TATA box binding protein (TBP)-associated factor, 30kDa	TAF10	950	P	952	P	1	962	P	794	P	1	1083	P	928	P	1	Homo sapiens TATA box binding protein (TBP)-associated factor, RNA polymerase II, H, 30kD (TAF2H), mRNA.
200056_s_at	nuclear DNA-binding protein	C1D	106	P	72	P	1	32	P	37	A	1	65	P	68	A	1	Homo sapiens nuclear DNA-binding protein (C1D), mRNA.
200057_s_at	non-POU domain containing, octamer-binding	NONO	1384	P	694	P	2	1282	P	756	P	2	789	P	952	P	1	Homo sapiens non-POU-domain-containing, octamer-binding (NONO), mRNA.
200058_s_at	U5 snRNP-specific protein, 200-KD	U5-200KD	790	P	444	P	2	490	P	279	P	2	768	P	249	P	3	Homo sapiens, Similar to U5 snRNP-specific protein, 200 kDa (DEXH RNA helicase family), clone MGC:2580, mRNA, complete cds.
200059_s_at	ras homolog gene family, member A	ARHA	1032	P	1167	P	1	1471	P	2000	P	1	1662	P	2483	P	1	Homo sapiens, ras homolog gene family, member A, clone MGC:2330, mRNA, complete cds.
200060_s_at	RNA binding protein S1, serine-rich domain	RNPS1	660	P	855	P	1	549	P	459	M	1	570	P	399	A	1	Homo sapiens, RNA-binding protein S1, serine-rich domain, clone MGC:1125, mRNA, complete cds.
200061_s_at	ribosomal protein S24	RPS24	1709	P	1020	P	2	3884	P	1899	P	2	1833	P	1458	P	1	Homo sapiens, Similar to ribosomal protein S24, clone MGC:8595, mRNA, complete cds.
200062_s_at	ribosomal protein L30	RPL30	7687	P	3502	P	2	11022	P	6825	P	2	4990	P	5414	P	1	Homo sapiens ribosomal protein L30 mRNA, complete cds.
200063_s_at	nucleophosmin (nucleolar phosphoprotein B23, numatrin)	NPM1	2939	P	823	P	4	2309	P	388	P	6	1159	P	300	P	4	Homo sapiens, nucleophosmin (nucleolar phosphoprotein B23, numatrin), clone MGC:8463, mRNA, complete cds.
200064_at	heat shock 90kDa protein 1, beta	HSPCB	1668	P	305	P	5	1466	P	417	P	4	488	P	383	A	1	Homo sapiens isolate Liv chaperone protein HSP90 beta (HSP90BETA) mRNA, complete cds.
200065_s_at	ADP-ribosylation factor 1	ARF1	1470	P	601	P	2	2059	P	1876	P	1	836	P	900	P	1	Homo sapiens clone 24537 ADP-ribosylation factor 1 mRNA, complete cds.
200066_at	IK cytokine, down-regulator of HLA II	IK	493	P	350	P	1	615	P	498	P	1	590	P	398	P	1	Homo sapiens chondrosarcoma-associated protein 2 (CSA2) mRNA, complete cds.
200067_x_at	sorting nexin 3	SNX3	1339	P	1239	P	1	1554	P	6810	P	0	1353	P	2343	P	1	Human DNA sequence from clone RP3-429G5 on chromosome 6q21-22.1. Contains the NR2E1 gene for nuclear receptor 2E1 (tailless, TLL, TLX, XTLL), the 3 end of the SNX3 gene for sorting nexin 3, ESTs, STSs, GSSs and four predicted CpG islands
200068_s_at	calnexin	CANX	1428	P	653	P	2	1636	P	787	P	2	1260	P	884	P	1	Human calnexin mRNA, complete cds.
200069_at	squamous cell carcinoma antigen recognised by T cells 3	SART3	144	P	131	P	1	74	P	102	P	1	103	P	41	A	3	EST
200070_at	hypothetical protein CGI-57	CGI-57	328	P	445	P	1	196	P	532	P	0	484	P	493	P	1	Homo sapiens, hypothetical protein, clone MGC:782, mRNA, complete cds.
200071_at	splicing factor 30, survival of motor neuron-related	SPF30	270	P	188	P	1	166	P	154	A	1	175	P	237	P	1	EST
200072_s_at	heterogeneous nuclear ribonucleoprotein M	HNRPM	615	P	268	P	2	693	P	404	P	2	608	P	416	P	1	Homo sapiens M4 protein deletion mutant mRNA, complete cds.
200073_s_at	heterogeneous nuclear ribonucleoprotein D (AU-rich element RNA binding protein 1, 37kDa)	HNRPD	382	P	445	P	1	264	P	252	P	1	466	P	210	P	2	Homo sapiens hnRNP-C like protein mRNA, complete cds.
200074_s_at	ribosomal protein L14	RPL14	1144	P	1024	P	1	4178	P	1069	P	4	1504	P	738	P	2	Homo sapiens CAG-isl 7 mRNA, complete cds.
200075_s_at	guanylate kinase 1	GUK1	1193	P	1902	P	1	962	P	3086	P	0	268	P	2775	P	0	Homo sapiens, guanylate kinase 1, clone MGC:10618, mRNA, complete cds.
200076_s_at	hypothetical protein MGC2749	MGC2749	242	P	370	P	1	226	P	284	A	1	220	P	239	A	1	Homo sapiens, hypothetical protein MGC2749, clone MGC:4376, mRNA, complete cds.
200077_s_at	ornithine decarboxylase antizyme 1	OAZ1	3320	P	7006	P	0	4673	P	17126	P	0	3636	P	13427	P	0	Human mRNA for ornithine decarboxylase antizyme, complete cds.
200078_s_at	ATPase, H+ transporting, lysosomal 21kDa, V0 subunit c''	ATP6V0B	278	P	526	P	1	886	P	1043	P	1	337	P	1319	P	0	Homo sapiens, ATPase, H+ transporting, lysosomal (vacuolar proton pump) 21kD, clone MGC:4498, mRNA, complete cds.
200079_s_at	lysyl-tRNA synthetase	KARS	292	P	238	P	1	512	P	436	P	1	631	P	380	P	2	Homo sapiens lysyl-tRNA synthetase mRNA, complete cds; nuclear gene for mitochondrial product; alternatively spliced.
200080_s_at	H3 histone, family 3A	H3F3A	2098	P	5370	P	0	1738	P	4231	P	0	2418	P	4232	P	1	EST
200081_s_at	ribosomal protein S6	RPS6	4278	P	1193	P	4	8332	P	3490	P	2	4006	P	4313	P	1	EST
200082_s_at	ribosomal protein S7	RPS7	626	P	245	P	3	1616	P	268	P	6	355	P	232	P	2	EST
200083_at	ubiquitin specific protease 22	USP22	432	P	492	P	1	599	P	201	P	3	417	P	305	P	1	EST
200084_at	small acidic protein	SMAP	392	P	308	P	1	611	P	382	P	2	243	P	282	P	1	EST
200085_s_at	transcription elongation factor B (SIII), polypeptide 2 (18kDa, elongin B)	TCEB2	638	P	455	P	1	1034	P	1626	P	1	305	P	911	P	0	Homo sapiens transcription elongation factor B (SIII), polypeptide 2 (18kD, elongin B) (TCEB2), mRNA.
200086_s_at	cytochrome c oxidase subunit IV isoform 1	COX4I1	499	P	544	P	1	961	P	437	P	2	1012	P	659	P	2	EST
200087_s_at	coated vesicle membrane protein	RNP24	714	P	237	P	3	569	P	218	P	3	439	P	245	P	2	Homo sapiens cDNA: FLJ21323 fis, clone COL02374.
200088_x_at			8216	P	5591	P	1	15601	P	11946	P	1	10301	P	7439	P	1	Homo sapiens cDNA: FLJ22838 fis, clone KAIA4494, highly similar to HUML12A Human ribosomal protein L12 mRNA.
200089_s_at	ribosomal protein L4	RPL4	2507	P	1120	P	2	4740	P	1156	P	4	5546	P	1096	P	5	EST
200090_at	farnesyltransferase, CAAX box, alpha	FNTA	1095	P	764	P	1	1274	P	534	P	2	1217	P	713	P	2	EST
200091_s_at	ribosomal protein S25	RPS25	1948	P	2657	P	1	2455	P	1797	P	1	1299	P	1188	P	1	EST
200092_s_at	ribosomal protein L37	RPL37	3666	P	2046	P	2	5918	P	2529	P	2	2346	P	2216	P	1	EST
200093_s_at	histidine triad nucleotide binding protein 1	HINT1	742	P	137	P	5	861	P	134	P	6	306	P	106	M	3	EST
200094_s_at	eukaryotic translation elongation factor 2	EEF2	1483	P	1122	P	1	3398	P	1029	P	3	1590	P	422	P	4	EST
200095_x_at	ribosomal protein S10	RPS10	10483	P	8006	P	1	17916	P	8397	P	2	11894	P	10810	P	1	EST
200096_s_at	ATPase, H+ transporting, lysosomal 9kDa, V0 subunit e	ATP6V0E	332	P	814	P	0	909	P	696	P	1	466	P	904	P	1	EST
200097_s_at	heterogeneous nuclear ribonucleoprotein K	HNRPK	389	P	375	P	1	375	P	578	P	1	374	P	334	P	1	EST
200098_s_at	anaphase promoting complex subunit 5	ANAPC5	756	P	536	P	1	663	P	592	P	1	990	P	450	P	2	EST
200099_s_at			2353	P	1564	P	2	7162	P	3378	P	2	2758	P	3500	P	1	Human DNA sequence from clone RP11-486O22 on chromosome 10 Contains the 3part of a gene for KIAA1128 protein, a novel pseudogene, a gene for protein similar to RPS3A (ribosomal protein S3A), ESTs, STSs, GSSs and CpG islands
200593_s_at	heterogeneous nuclear ribonucleoprotein U (scaffold attachment factor A)	HNRPU	531	P	375	P	1	456	P	413	A	1	437	P	396	A	1	Homo sapiens, heterogeneous nuclear ribonucleoprotein U (scaffold attachment factor A), clone MGC:1992, mRNA, complete cds.
200595_s_at	eukaryotic translation initiation factor 3, subunit 10 theta, 150/170kDa	EIF3S10	251	P	130	P	2	282	P	126	P	2	292	P	49	P	6	Homo sapiens eukaryotic translation initiation factor 3, subunit 10 (theta, 150170kD) (EIF3S10), mRNA.
200599_s_at	tumor rejection antigen (gp96) 1	TRA1	662	P	176	P	4	592	P	127	P	5	500	P	189	P	3	Homo sapiens tumor rejection antigen (gp96) 1 (TRA1), mRNA.
200600_at	moesin	MSN	196	P	1012	P	0	217	P	338	P	1	1867	P	650	P	3	Homo sapiens moesin (MSN), mRNA.
200601_at	actinin, alpha 4	ACTN4	173	P	208	A	1	114	A	143	A	1	224	P	159	A	1	Human non-muscle alpha-actinin mRNA, complete cds.
200602_at	amyloid beta (A4) precursor protein (protease nexin-II, Alzheimer disease)	APP	532	P	360	P	1	130	P	57	P	2	214	P	147	P	1	Homo sapiens amyloid beta (A4) precursor protein (protease nexin-II, Alzheimer disease) (APP), mRNA.
200603_at	protein kinase, cAMP-dependent, regulatory, type I, alpha (tissue specific extinguisher 1)	PRKAR1A	411	P	841	P	0	251	P	472	P	1	368	P	474	P	1	Homo sapiens mRNA; cDNA DKFZp566J0124 (from clone DKFZp566J0124).
200606_at	desmoplakin (DPI, DPII)	DSP	1453	P	75	P	19	435	P	73	A	6	164	P	53	A	3	Homo sapiens desmoplakin (DPI, DPII) (DSP), mRNA.
200608_s_at	RAD21 homolog (S. pombe)	RAD21	328	P	177	P	2	164	P	98	P	2	175	P	84	P	2	Homo sapiens RAD21 (S. pombe) homolog (RAD21), mRNA.
200609_s_at	WD repeat domain 1	WDR1	428	P	966	P	0	784	P	1033	P	1	1025	P	1296	P	1	Homo sapiens WD repeat domain 1 (WDR1), transcript variant 1, mRNA.
200610_s_at	nucleolin	NCL	2060	P	460	P	4	1200	P	352	P	3	574	P	328	P	2	Homo sapiens nucleolin (NCL), mRNA.
200612_s_at	adaptor-related protein complex 2, beta 1 subunit	AP2B1	99	A	269	M	0	151	P	278	A	1	79	A	328	P	0	Homo sapiens adaptor-related protein complex 2, beta 1 subunit (AP2B1), mRNA.
200613_at	adaptor-related protein complex 2, mu 1 subunit	AP2M1	403	P	186	P	2	93	A	624	P	0	125	P	230	P	1	Homo sapiens adaptor-related protein complex 2, mu 1 subunit (AP2M1), mRNA.
200614_at	clathrin, heavy polypeptide (Hc)	CLTC	1636	P	608	P	3	1665	P	656	P	3	1140	P	990	P	1	Homo sapiens clathrin, heavy polypeptide (Hc) (CLTC), mRNA.
200618_at	LIM and SH3 protein 1	LASP1	775	P	772	P	1	310	P	427	P	1	598	P	743	P	1	Homo sapiens LIM and SH3 protein 1 (LASP1), mRNA.
200619_at	splicing factor 3b, subunit 2, 145kDa	SF3B2	313	P	163	A	2	437	P	59	A	7	586	P	137	A	4	Homo sapiens splicing factor 3b, subunit 2, 145kD (SF3B2), mRNA.
200620_at	chromosome 1 open reading frame 8	C1orf8	205	P	422	P	0	1024	P	603	P	2	616	P	579	P	1	Homo sapiens chromosome 1 open reading frame 8 (C1ORF8), mRNA.
200621_at	cysteine and glycine-rich protein 1	CSRP1	421	P	274	P	2	491	P	218	M	2	211	P	298	P	1	Homo sapiens cysteine and glycine-rich protein 1 (CSRP1), mRNA.
200623_s_at	calmodulin 3 (phosphorylase kinase, delta)	CALM3	102	M	151	A	1	79	A	128	A	1	73	M	74	A	1	Homo sapiens calmodulin 3 (phosphorylase kinase, delta) (CALM3), mRNA.
200626_s_at	matrin 3	MATR3	166	P	80	M	2	138	P	67	P	2	108	P	41	A	3	Homo sapiens matrin 3 (MATR3), mRNA.
200627_at	unactive progesterone receptor, 23 kD	TEBP	915	P	495	P	2	1095	P	601	P	2	427	P	403	P	1	Homo sapiens, unactive progesterone receptor, 23 kD, clone MGC:4004, mRNA, complete cds.
200629_at	tryptophanyl-tRNA synthetase	WARS	840	P	1119	P	1	926	P	480	P	2	1838	P	416	P	4	Homo sapiens tryptophanyl-tRNA synthetase (WARS), mRNA.
200631_s_at	SET translocation (myeloid leukemia-associated)	SET	1038	P	265	P	4	1362	P	337	P	4	715	P	368	P	2	Homo sapiens SET translocation (myeloid leukemia-associated) (SET), mRNA.
200632_s_at	N-myc downstream regulated gene 1	NDRG1	552	P	476	P	1	1318	P	350	P	4	1093	P	586	P	2	Homo sapiens N-myc downstream regulated (NDRG1), mRNA.
200633_at	ubiquitin B	UBB	6342	P	13856	P	0	12880	P	44168	P	0	7921	P	25723	P	0	Homo sapiens ubiquitin B (UBB), mRNA.
200634_at	profilin 1	PFN1	82	P	216	P	0	144	P	152	P	1	197	P	117	P	2	Homo sapiens profilin 1 (PFN1), mRNA.
200636_s_at	protein tyrosine phosphatase, receptor type, F	PTPRF	514	P	11	A	48	301	P	93	A	3	61	A	49	A	1	Homo sapiens protein tyrosine phosphatase, receptor type, F (PTPRF), mRNA.
200640_at	tyrosine 3-monooxygenase/tryptophan 5-monooxygenase activation protein, zeta polypeptide	YWHAZ	1490	P	868	P	2	1470	P	855	P	2	961	P	868	P	1	Homo sapiens tyrosine 3-monooxygenasetryptophan 5-monooxygenase activation protein, zeta polypeptide (YWHAZ), mRNA.
200642_at	superoxide dismutase 1, soluble (amyotrophic lateral sclerosis 1 (adult))	SOD1	2074	P	407	P	5	3316	P	684	P	5	1151	P	456	P	3	Homo sapiens superoxide dismutase 1, soluble (amyotrophic lateral sclerosis 1 (adult)) (SOD1), mRNA.
200643_at	high density lipoprotein binding protein (vigilin)	HDLBP	161	P	19	A	9	203	A	27	A	8	124	P	23	A	5	Homo sapiens high density lipoprotein binding protein (vigilin) (HDLBP), mRNA.
200644_at	MARCKS-like protein	MLP	254	P	120	P	2	396	P	135	P	3	188	P	179	P	1	Homo sapiens macrophage myristoylated alanine-rich C kinase substrate (MACMARCKS), mRNA.
200645_at	GABA(A) receptor-associated protein	GABARAP	564	P	973	P	1	1415	P	1708	P	1	1001	P	1098	P	1	Homo sapiens GABA(A) receptor-associated protein (GABARAP), mRNA.
200649_at	nucleobindin 1	NUCB1	113	P	91	P	1	59	A	196	A	0	190	P	179	A	1	Homo sapiens, nucleobindin 1, clone MGC:8479, mRNA, complete cds.
200650_s_at	lactate dehydrogenase A	LDHA	1932	P	810	P	2	3448	P	995	P	3	1391	P	1050	P	1	Homo sapiens lactate dehydrogenase A (LDHA), mRNA.
200651_at	guanine nucleotide binding protein (G protein), beta polypeptide 2-like 1	GNB2L1	2515	P	451	P	6	4880	P	960	P	5	1875	P	573	P	3	Homo sapiens guanine nucleotide binding protein (G protein), beta polypeptide 2-like 1 (GNB2L1), mRNA.
200652_at	signal sequence receptor, beta (translocon-associated protein beta)	SSR2	1198	P	428	P	3	1682	P	426	P	4	566	P	540	P	1	Homo sapiens signal sequence receptor, beta (translocon-associated protein beta) (SSR2), mRNA.
200655_s_at	calmodulin 1 (phosphorylase kinase, delta)	CALM1	960	P	1316	P	1	388	P	1139	P	0	2092	P	1447	P	1	Homo sapiens calmodulin 1 (phosphorylase kinase, delta) (CALM1), mRNA.
200656_s_at	procollagen-proline, 2-oxoglutarate 4-dioxygenase (proline 4-hydroxylase), beta polypeptide (protein disulfide isomerase; thyroid hormone binding protein p55)	P4HB	155	P	110	A	1	174	P	168	P	1	57	M	70	A	1	Homo sapiens procollagen-proline, 2-oxoglutarate 4-dioxygenase (proline 4-hydroxylase), beta polypeptide (protein disulfide isomerase; thyroid hormone binding protein p55) (P4HB), mRNA.
200657_at	solute carrier family 25 (mitochondrial carrier; adenine nucleotide translocator), member 5	SLC25A5	2675	P	707	P	4	5260	P	1235	P	4	4219	P	1565	P	3	Homo sapiens solute carrier family 25 (mitochondrial carrier; adenine nucleotide translocator), member 5 (SLC25A5), nuclear gene encoding mitochondrial protein, mRNA.
200658_s_at	prohibitin	PHB	648	P	50	P	13	464	P	102	P	5	38	P	114	P	0	EST
200660_at	S100 calcium binding protein A11 (calgizzarin)	S100A11	721	P	670	P	1	447	P	466	A	1	694	P	468	M	1	Homo sapiens S100 calcium-binding protein A11 (calgizzarin) (S100A11), mRNA.
200661_at	protective protein for beta-galactosidase (galactosialidosis)	PPGB	156	P	328	P	0	114	A	217	A	1	1276	P	533	P	2	Homo sapiens protective protein for beta-galactosidase (galactosialidosis) (PPGB), mRNA.
200662_s_at	translocase of outer mitochondrial membrane 20 (yeast) homolog	TOMM20-PENDING	470	P	96	P	5	436	P	137	A	3	172	P	166	P	1	Homo sapiens translocase of outer mitochondrial membrane 20 (yeast) homolog (KIAA0016), mRNA.
200663_at	CD63 antigen (melanoma 1 antigen)	CD63	3400	P	1272	P	3	2478	P	1315	P	2	2236	P	1194	P	2	Homo sapiens CD63 antigen (melanoma 1 antigen) (CD63), mRNA.
200665_s_at	secreted protein, acidic, cysteine-rich (osteonectin)	SPARC	29	A	1068	P	0	123	P	739	P	0	615	P	468	P	1	Homo sapiens secreted protein, acidic, cysteine-rich (osteonectin) (SPARC), mRNA.
200666_s_at	DnaJ (Hsp40) homolog, subfmaily B, member 1	DNAJB1	404	P	168	P	2	258	P	260	P	1	222	P	152	P	1	Homo sapiens heat shock 40kD protein 1 (HSPF1), mRNA.
200668_s_at	ubiquitin-conjugating enzyme E2D 3 (UBC4/5 homolog, yeast)	UBE2D3	181	P	586	P	0	274	P	763	P	0	523	P	492	P	1	Homo sapiens, ubiquitin-conjugating enzyme E2D 3 (homologous to yeast UBC45), clone MGC:5416, mRNA, complete cds.
200670_at	X-box binding protein 1	XBP1	1405	P	129	P	11	207	P	88	P	2	36	P	70	P	1	Homo sapiens X-box binding protein 1 (XBP1), mRNA.
200673_at	lysosomal-associated protein transmembrane 4 alpha	LAPTM4A	1412	P	765	P	2	520	P	471	P	1	551	P	535	P	1	Homo sapiens lysosomal-associated protein transmembrane 4 alpha (MBNT), mRNA.
200674_s_at	ribosomal protein L32	RPL32	3526	P	2615	P	1	9609	P	3204	P	3	6481	P	3484	P	2	Homo sapiens ribosomal protein L32 (RPL32), mRNA.
200675_at	CD81 antigen (target of antiproliferative antibody 1)	CD81	576	P	260	P	2	399	P	206	P	2	232	P	203	P	1	Homo sapiens CD81 antigen (target of antiproliferative antibody 1) (CD81), mRNA.
200677_at	pituitary tumor-transforming 1 interacting protein	PTTG1IP	978	P	911	P	1	563	P	805	P	1	1048	P	1107	P	1	Homo sapiens pituitary tumor-transforming 1 interacting protein (PTTG1IP), mRNA.
200679_x_at	high-mobility group box 1	HMGB1	336	P	217	P	2	300	P	82	P	4	77	P	62	P	1	EST
200681_at	glyoxalase I	GLO1	1253	P	196	A	6	3433	P	220	A	16	359	P	212	A	2	Homo sapiens glyoxalase I (GLO1), mRNA.
200682_s_at	ESTs, Highly similar to C Chain C, Structure Of A Cbl-Ubch7 Complex: Ring Domain Function In Ubiquitin-Protein Ligases [H.sapiens]		302	P	290	P	1	647	P	415	P	2	402	P	433	P	1	EST
200686_s_at	splicing factor, arginine/serine-rich 11	SFRS11	937	P	733	P	1	445	P	340	P	1	428	P	364	P	1	Homo sapiens splicing factor, arginineserine-rich 11 (SFRS11), mRNA.
200687_s_at	splicing factor 3b, subunit 3, 130kDa	SF3B3	139	P	98	A	1	102	A	137	A	1	153	P	206	A	1	Homo sapiens splicing factor 3b, subunit 3, 130kD (SF3B3), mRNA.
200691_s_at	heat shock 70kDa protein 9B (mortalin-2)	HSPA9B	560	P	223	P	3	654	P	157	P	4	463	P	204	P	2	Homo sapiens, heat shock 70kD protein 9B (mortalin-2), clone MGC:8684, mRNA, complete cds.
200694_s_at	DEAD/H (Asp-Glu-Ala-Asp/His) box polypeptide 24	DDX24	447	P	292	P	2	334	P	235	P	1	381	P	372	P	1	Homo sapiens DEADH (Asp-Glu-Ala-AspHis) box polypeptide 24 (DDX24), mRNA.
200695_at	protein phosphatase 2 (formerly 2A), regulatory subunit A (PR 65), alpha isoform	PPP2R1A	173	A	123	A	1	177	A	263	A	1	68	A	163	A	0	Homo sapiens protein phosphatase 2 (formerly 2A), regulatory subunit A (PR 65), alpha isoform (PPP2R1A), mRNA.
200696_s_at	gelsolin (amyloidosis, Finnish type)	GSN	376	P	207	P	2	142	A	345	P	0	450	P	452	A	1	Homo sapiens gelsolin (amyloidosis, Finnish type) (GSN), mRNA.
200697_at	hexokinase 1	HK1	434	P	340	P	1	468	P	1698	P	0	1132	P	939	P	1	Homo sapiens hexokinase 1 (HK1), nuclear gene encoding mitochondrial protein, mRNA.
200699_at	ribosomal protein L23	RPL23	763	P	99	M	8	431	P	89	A	5	239	P	103	P	2	EST
200701_at	Niemann-Pick disease, type C2	NPC2	400	P	1406	P	0	960	P	728	P	1	1858	P	876	P	2	Homo sapiens epididymal secretory protein (19.5kD) (HE1), mRNA.
200703_at	dynein, cytoplasmic, light polypeptide 1	DNCL1	1029	P	723	P	1	1077	P	1265	P	1	750	P	557	P	1	Homo sapiens dynein, cytoplasmic, light polypeptide (PIN), mRNA.
200704_at	LPS-induced TNF-alpha factor	PIG7	583	P	2894	P	0	718	P	2161	P	0	1186	P	2251	P	1	Homo sapiens SIMPLE mRNA for small integral membrane protein of lysosomelate endosome, complete cds.
200705_s_at	eukaryotic translation elongation factor 1 beta 2	EEF1B2	2198	P	745	P	3	4437	P	1290	P	3	3297	P	1426	P	2	Homo sapiens eukaryotic translation elongation factor 1 beta 2 (EEF1B2), mRNA.
200707_at	protein kinase C substrate 80K-H	PRKCSH	29	A	13	A	2	40	A	55	A	1	59	A	12	A	5	Homo sapiens protein kinase C substrate 80K-H (PRKCSH), mRNA.
200708_at	glutamic-oxaloacetic transaminase 2, mitochondrial (aspartate aminotransferase 2)	GOT2	208	P	193	A	1	245	P	89	A	3	90	A	34	A	3	Homo sapiens glutamic-oxaloacetic transaminase 2, mitochondrial (aspartate aminotransferase 2) (GOT2), nuclear gene encoding mitochondrial protein, mRNA.
200709_at	FK506 binding protein 1A, 12kDa	FKBP1A	246	P	395	P	1	236	P	284	P	1	440	P	326	P	1	Homo sapiens FK506-binding protein 1A (12kD) (FKBP1A), mRNA.
200710_at	acyl-Coenzyme A dehydrogenase, very long chain	ACADVL	376	P	218	A	2	641	P	272	A	2	842	P	328	A	3	Homo sapiens acyl-Coenzyme A dehydrogenase, very long chain (ACADVL), nuclear gene encoding mitochondrial protein, mRNA.
200713_s_at	microtubule-associated protein, RP/EB family, member 1	MAPRE1	1372	P	1518	P	1	1525	P	1211	P	1	1578	P	1692	P	1	Homo sapiens microtubule-associated protein, RPEB family, member 1 (MAPRE1), mRNA.
200716_x_at	ribosomal protein L13a	RPL13A	4355	P	1338	P	3	10572	P	2091	P	5	1142	P	2224	P	1	Homo sapiens ribosomal protein L13a (RPL13A), mRNA.
200717_x_at	ribosomal protein L7	RPL7	8602	P	3716	P	2	10110	P	8005	P	1	6086	P	5600	P	1	Homo sapiens ribosomal protein L7 (RPL7), mRNA.
200718_s_at	S-phase kinase-associated protein 1A (p19A)	SKP1A	1819	P	2166	P	1	2286	P	3853	P	1	1782	P	2896	P	1	EST
200720_s_at	ARP1 actin-related protein 1 homolog A, centractin alpha (yeast)	ACTR1A	137	M	142	A	1	140	P	231	A	1	184	P	173	A	1	EST
200722_s_at	membrane component, chromosome 11, surface marker 1	M11S1	95	P	132	A	1	79	A	118	A	1	82	P	75	A	1	EST
200726_at	protein phosphatase 1, catalytic subunit, gamma isoform	PPP1CC	730	P	614	P	1	638	P	539	P	1	591	P	547	P	1	Homo sapiens protein phosphatase 1, catalytic subunit, gamma isoform (PPP1CC), mRNA.
200728_at	Homo sapiens mRNA; cDNA DKFZp566E233 (from clone DKFZp566E233)		297	P	429	P	1	392	P	1018	P	0	175	P	1309	P	0	EST
200733_s_at	protein tyrosine phosphatase type IVA, member 1	PTP4A1	282	P	182	P	2	78	P	89	P	1	41	P	78	P	1	Homo sapiens protein tyrosine phosphatase PTPCAAX1 (hPTPCAAX1) mRNA, complete cds.
200735_x_at	nascent-polypeptide-associated complex alpha polypeptide	NACA	2701	P	1439	P	2	5770	P	2956	P	2	3738	P	2839	P	1	Homo sapiens nascent-polypeptide-associated complex alpha polypeptide (NACA), mRNA.
200736_s_at	glutathione peroxidase 1	GPX1	903	P	3512	P	0	3339	P	15171	P	0	1777	P	5396	P	0	Homo sapiens glutathione peroxidase 1 (GPX1), mRNA.
200738_s_at	phosphoglycerate kinase 1	PGK1	1503	P	1721	P	1	1197	P	951	P	1	1707	P	1128	P	2	Homo sapiens phosphoglycerate kinase 1 (PGK1), mRNA.
200740_s_at	SMT3 suppressor of mif two 3 homolog 1 (yeast)	SMT3H1	1032	P	551	P	2	1134	P	745	P	2	1025	P	442	P	2	Homo sapiens SMT3 (suppressor of mif two 3, yeast) homolog 1 (SMT3H1), mRNA.
200741_s_at	ribosomal protein S27 (metallopanstimulin 1)	RPS27	4798	P	2988	P	2	7888	P	3552	P	2	3870	P	3140	P	1	Homo sapiens ribosomal protein S27 (metallopanstimulin 1) (RPS27), mRNA.
200743_s_at	ceroid-lipofuscinosis, neuronal 2, late infantile (Jansky-Bielschowsky disease)	CLN2	357	P	687	P	1	252	P	405	P	1	1802	P	361	P	5	Homo sapiens ceroid-lipofuscinosis, neuronal 2, late infantile (Jansky-Bielschowsky disease) (CLN2), mRNA.
200745_s_at	guanine nucleotide binding protein (G protein), beta polypeptide 1	GNB1	159	P	392	P	0	388	P	301	P	1	135	P	360	P	0	Homo sapiens clone 24584 beta-subunit signal transducing proteins GSGI mRNA, partial cds.
200747_s_at	nuclear mitotic apparatus protein 1	NUMA1	214	P	130	A	2	94	A	11	A	8	209	P	51	A	4	Homo sapiens nuclear mitotic apparatus protein 1 (NUMA1), mRNA.
200748_s_at	ferritin, heavy polypeptide 1	FTH1	2600	P	3766	P	1	2737	P	5995	P	0	5510	P	5213	P	1	Homo sapiens ferritin, heavy polypeptide 1 (FTH1), mRNA.
200750_s_at	RAN, member RAS oncogene family	RAN	600	P	109	P	5	892	P	100	M	9	267	P	44	A	6	Homo sapiens GTP binding protein mRNA, complete cds.
200752_s_at	calpain 1, (mu/I) large subunit	CAPN1	101	A	59	A	2	21	A	58	A	0	89	A	15	A	6	Homo sapiens calpain 1, (muI) large subunit (CAPN1), mRNA.
200757_s_at	calumenin	CALU	112	P	61	A	2	107	P	66	A	2	57	A	12	A	5	Homo sapiens calumenin (CALU), mRNA.
200761_s_at	vitamin A responsive; cytoskeleton related	JWA	1568	P	1710	P	1	728	P	833	P	1	2123	P	914	P	2	Homo sapiens vitamin A responsive; cytoskeleton related (JWA), mRNA.
200762_at	dihydropyrimidinase-like 2	DPYSL2	99	P	271	A	0	155	P	181	A	1	762	P	256	P	3	Homo sapiens dihydropyrimidinase-like 2 (DPYSL2), mRNA.
200763_s_at	ribosomal protein, large, P1	RPLP1	6162	P	3895	P	2	10122	P	5246	P	2	4495	P	5241	P	1	Homo sapiens ribosomal protein, large, P1 (RPLP1), mRNA.
200764_s_at	catenin (cadherin-associated protein), alpha 1, 102kDa	CTNNA1	167	P	65	A	3	100	P	74	M	1	51	P	79	A	1	EST
200766_at	cathepsin D (lysosomal aspartyl protease)	CTSD	186	P	95	P	2	41	A	113	M	0	154	P	141	P	1	Homo sapiens cathepsin D (lysosomal aspartyl protease) (CTSD), mRNA.
200768_s_at	methionine adenosyltransferase II, alpha	MAT2A	1366	P	479	P	3	618	P	286	P	2	608	P	347	P	2	Homo sapiens, methionine adenosyltransferase II, alpha, clone MGC:2907, mRNA, complete cds.
200771_at	laminin, gamma 1 (formerly LAMB2)	LAMC1	36	A	55	A	1	321	P	64	A	5	44	A	27	A	2	Homo sapiens laminin, gamma 1 (formerly LAMB2) (LAMC1), mRNA.
200773_x_at	prothymosin, alpha (gene sequence 28)	PTMA	1494	P	1128	P	1	1334	P	786	P	2	732	P	943	P	1	Homo sapiens prothymosin, alpha (gene sequence 28) (PTMA), mRNA.
200779_at	activating transcription factor 4 (tax-responsive enhancer element B67)	ATF4	3106	P	1092	P	3	3776	P	1935	P	2	1551	P	1345	P	1	Homo sapiens activating transcription factor 4 (tax-responsive enhancer element B67) (ATF4), mRNA.
200781_s_at	ribosomal protein S15a	RPS15A	3420	P	2082	P	2	5023	P	3490	P	1	2635	P	2293	P	1	Homo sapiens ribosomal protein S15a (RPS15A), mRNA.
200782_at	annexin A5	ANXA5	392	P	496	P	1	895	P	373	P	2	1101	P	480	P	2	Homo sapiens annexin A5 (ANXA5), mRNA.
200783_s_at	stathmin 1/oncoprotein 18	STMN1	66	P	38	A	2	209	P	99	A	2	42	A	33	A	1	Homo sapiens leukemia-associated phosphoprotein p18 (stathmin) (LAP18), mRNA.
200785_s_at	low density lipoprotein-related protein 1 (alpha-2-macroglobulin receptor)	LRP1	39	A	95	A	0	52	A	129	A	0	138	P	116	A	1	Homo sapiens low density lipoprotein-related protein 1 (alpha-2-macroglobulin receptor) (LRP1), mRNA.
200786_at	proteasome (prosome, macropain) subunit, beta type, 7	PSMB7	849	P	280	P	3	1194	P	515	P	2	657	P	491	P	1	Homo sapiens proteasome (prosome, macropain) subunit, beta type, 7 (PSMB7), mRNA.
200788_s_at	phosphoprotein enriched in astrocytes 15	PEA15	389	P	265	P	1	443	P	153	P	3	809	P	175	P	5	Homo sapiens phosphoprotein enriched in astrocytes 15 (PEA15), mRNA.
200789_at	enoyl Coenzyme A hydratase 1, peroxisomal	ECH1	190	P	162	P	1	636	P	255	P	2	257	P	327	M	1	Homo sapiens enoyl Coenzyme A hydratase 1, peroxisomal (ECH1), mRNA.
200790_at	ornithine decarboxylase 1	ODC1	626	P	614	P	1	2758	P	1131	P	2	884	P	687	P	1	Homo sapiens ornithine decarboxylase 1 (ODC1) mRNA.
200792_at	thyroid autoantigen 70kDa (Ku antigen)	G22P1	1256	P	591	P	2	1976	P	468	P	4	1109	P	371	P	3	Homo sapiens thyroid autoantigen 70kD (Ku antigen) (G22P1), mRNA.
200793_s_at	aconitase 2, mitochondrial	ACO2	147	A	14	A	11	91	A	32	A	3	125	A	21	A	6	Homo sapiens aconitase 2, mitochondrial (ACO2), nuclear gene encoding mitochondrial protein, mRNA.
200795_at	SPARC-like 1 (mast9, hevin)	SPARCL1	38	P	37	A	1	35	A	81	A	0	21	A	85	A	0	Homo sapiens SPARC-like 1 (mast9, hevin) (SPARCL1), mRNA.
200797_s_at	myeloid cell leukemia sequence 1 (BCL2-related)	MCL1	4162	P	8858	P	0	4029	P	5017	P	1	6734	P	7002	P	1	EST
200800_s_at	heat shock 70kDa protein 1A	HSPA1A	1950	P	515	P	4	259	P	480	P	1	486	P	679	P	1	Homo sapiens heat shock 70kD protein 1A (HSPA1A), mRNA.
200802_at	seryl-tRNA synthetase	SARS	309	P	172	A	2	376	P	118	A	3	210	P	163	A	1	Homo sapiens seryl-tRNA synthetase (SARS), mRNA.
200804_at	testis enhanced gene transcript (BAX inhibitor 1)	TEGT	1910	P	1023	P	2	2047	P	1414	P	1	1916	P	1475	P	1	Homo sapiens testis enhanced gene transcript (TEGT), mRNA.
200805_at	chromosome 5 open reading frame 8	C5orf8	377	P	95	A	4	140	P	107	A	1	166	P	26	A	6	Homo sapiens endoplasmic reticulum glycoprotein (GP36B), mRNA.
200807_s_at	heat shock 60kDa protein 1 (chaperonin)	HSPD1	3455	P	742	P	5	3770	P	279	P	14	2555	P	237	P	11	Homo sapiens heat shock 60kD protein 1 (chaperonin) (HSPD1), mRNA.
200808_s_at	zyxin	ZYX	81	A	199	P	0	83	A	132	P	1	458	P	200	P	2	Homo sapiens zyxin (ZYX), mRNA.
200809_x_at	ribosomal protein L12	RPL12	8033	P	4413	P	2	14343	P	9075	P	2	3977	P	5678	P	1	Homo sapiens ribosomal protein L12 (RPL12), mRNA.
200810_s_at	cold inducible RNA binding protein	CIRBP	1340	P	686	P	2	969	P	928	P	1	863	P	507	P	2	Homo sapiens cold inducible RNA-binding protein (CIRBP), mRNA.
200812_at	chaperonin containing TCP1, subunit 7 (eta)	CCT7	964	P	159	P	6	748	P	176	P	4	498	P	73	A	7	Homo sapiens chaperonin containing TCP1, subunit 7 (eta) (CCT7), mRNA.
200814_at	proteasome (prosome, macropain) activator subunit 1 (PA28 alpha)	PSME1	2309	P	1930	P	1	2794	P	1974	P	1	1963	P	1790	P	1	Homo sapiens proteasome (prosome, macropain) activator subunit 1 (PA28 alpha) (PSME1), mRNA.
200816_s_at	platelet-activating factor acetylhydrolase, isoform Ib, alpha subunit 45kDa	PAFAH1B1	86	P	169	P	1	163	P	218	P	1	103	P	245	P	0	Homo sapiens platelet-activating factor acetylhydrolase, isoform Ib, alpha subunit (45kD) (PAFAH1B1), mRNA.
200817_x_at	ribosomal protein S10	RPS10	5914	P	2992	P	2	13244	P	4996	P	3	4689	P	4602	P	1	Homo sapiens ribosomal protein S10 (RPS10), mRNA.
200818_at	ATP synthase, H+ transporting, mitochondrial F1 complex, O subunit (oligomycin sensitivity conferring protein)	ATP5O	1024	P	216	P	5	1764	P	340	P	5	1431	P	305	P	5	Homo sapiens ATP synthase, H+ transporting, mitochondrial F1 complex, O subunit (oligomycin sensitivity conferring protein) (ATP5O), mRNA.
200819_s_at	ribosomal protein S15	RPS15	9992	P	7268	P	1	18573	P	14018	P	1	8398	P	10598	P	1	Homo sapiens ribosomal protein S15 (RPS15), mRNA.
200820_at	proteasome (prosome, macropain) 26S subunit, non-ATPase, 8	PSMD8	317	P	103	A	3	609	P	131	A	5	164	P	140	A	1	Homo sapiens proteasome (prosome, macropain) 26S subunit, non-ATPase, 8 (PSMD8), mRNA.
200821_at	lysosomal-associated membrane protein 2	LAMP2	124	P	280	P	0	73	P	202	P	0	104	P	182	P	1	Homo sapiens lysosomal-associated membrane protein 2 (LAMP2), transcript variant LAMP2B, mRNA.
200823_x_at	ribosomal protein L29	RPL29	1281	P	434	P	3	6377	P	757	P	8	1058	P	770	P	1	Homo sapiens ribosomal protein L29 (RPL29), mRNA.
200824_at	glutathione S-transferase pi	GSTP1	69	P	224	P	0	150	P	242	P	1	157	P	429	P	0	Homo sapiens glutathione S-transferase pi (GSTP1), mRNA.
200825_s_at	hypoxia up-regulated 1	HYOU1	98	A	209	A	0	192	P	150	A	1	182	P	140	A	1	Homo sapiens oxygen regulated protein (150kD) (ORP150), mRNA.
200826_at	small nuclear ribonucleoprotein D2 polypeptide 16.5kDa	SNRPD2	886	P	149	P	6	1602	P	258	P	6	632	P	239	P	3	Homo sapiens small nuclear ribonucleoprotein D2 polypeptide (16.5kD) (SNRPD2), mRNA.
200827_at	procollagen-lysine, 2-oxoglutarate 5-dioxygenase (lysine hydroxylase, Ehlers-Danlos syndrome type VI)	PLOD	61	A	48	A	1	47	A	111	A	0	99	P	119	A	1	Homo sapiens procollagen-lysine, 2-oxoglutarate 5-dioxygenase (lysine hydroxylase, Ehlers-Danlos syndrome type VI) (PLOD), mRNA.
200828_s_at	zinc finger protein 207	ZNF207	332	P	263	P	1	465	P	433	P	1	322	P	428	P	1	EST
200830_at	proteasome (prosome, macropain) 26S subunit, non-ATPase, 2	PSMD2	1050	P	391	P	3	542	P	435	P	1	750	P	503	P	1	Homo sapiens proteasome (prosome, macropain) 26S subunit, non-ATPase, 2 (PSMD2), mRNA.
200832_s_at	stearoyl-CoA desaturase (delta-9-desaturase)	SCD	46	A	70	A	1	78	P	34	A	2	47	M	13	A	4	Homo sapiens Scd mRNA for stearoyl-CoA desaturase, complete cds.
200834_s_at	ribosomal protein S21	RPS21	7341	P	3748	P	2	12760	P	3872	P	3	3908	P	5116	P	1	Homo sapiens ribosomal protein S21 (RPS21), mRNA.
200837_at	accessory protein BAP31	BCAP31	751	P	409	P	2	728	P	466	P	2	649	P	692	P	1	Homo sapiens accessory proteins BAP31BAP29 (DXS1357E), mRNA.
200839_s_at	cathepsin B	CTSB	230	P	460	P	0	246	P	881	P	0	2038	P	1346	P	2	Homo sapiens cathepsin B (CTSB), mRNA.
200840_at	lysyl-tRNA synthetase	KARS	1836	P	1940	P	1	2498	P	1889	P	1	3163	P	1777	P	2	Homo sapiens lysyl-tRNA synthetase (KARS), mRNA.
200843_s_at	glutamyl-prolyl-tRNA synthetase	EPRS	675	P	137	A	5	530	P	145	M	4	197	P	161	P	1	Homo sapiens glutamyl-prolyl-tRNA synthetase (EPRS), mRNA.
200845_s_at	antioxidant protein 2	AOP2	763	P	461	P	2	968	P	398	P	2	578	P	101	P	6	Homo sapiens anti-oxidant protein 2 (non-selenium glutathione peroxidase, acidic calcium-independent phospholipase A2) (KIAA0106), mRNA.
200846_s_at	protein phosphatase 1, catalytic subunit, alpha isoform	PPP1CA	159	P	98	A	2	226	P	105	A	2	176	P	131	A	1	Homo sapiens protein phosphatase 1, catalytic subunit, alpha isoform (PPP1CA), mRNA.
200847_s_at	hypothetical protein MGC8721	MGC8721	499	P	1648	P	0	1090	P	1694	P	1	1202	P	1276	P	1	Homo sapiens HSPC035 protein (LOC51669), mRNA.
200850_s_at	S-adenosylhomocysteine hydrolase-like 1	AHCYL1	165	P	149	P	1	235	P	192	P	1	108	P	188	P	1	Homo sapiens S-adenosylhomocysteine hydrolase-like 1 (AHCYL1), mRNA.
200852_x_at	guanine nucleotide binding protein (G protein), beta polypeptide 2	GNB2	232	P	323	P	1	396	P	306	P	1	156	P	344	P	0	Homo sapiens guanine nucleotide binding protein (G protein), beta polypeptide 2 (GNB2), mRNA.
200853_at	H2A histone family, member Z	H2AFZ	282	P	223	P	1	835	P	359	P	2	441	P	360	P	1	Homo sapiens H2A histone family, member Z (H2AFZ), mRNA.
200854_at	nuclear receptor co-repressor 1	NCOR1	109	P	176	P	1	136	P	119	P	1	160	P	152	P	1	Homo sapiens mRNA for KIAA1047 protein, partial cds.
200858_s_at	ribosomal protein S8	RPS8	2028	P	808	P	3	4553	P	450	P	10	1446	P	524	P	3	Homo sapiens ribosomal protein S8 (RPS8), mRNA.
200862_at	24-dehydrocholesterol reductase	DHCR24	298	P	56	A	5	649	P	130	A	5	80	P	98	A	1	Homo sapiens seladin-1 (KIAA0018), mRNA.
200863_s_at	RAB11A, member RAS oncogene family	RAB11A	954	P	1048	P	1	1910	P	786	P	2	799	P	1343	P	1	EST
200866_s_at	prosaposin (variant Gaucher disease and variant metachromatic leukodystrophy)	PSAP	199	P	326	P	1	205	P	439	P	0	494	P	924	P	1	Human saposin proteins A-D mRNA, complete cds.
200867_at	zinc finger protein 313	ZNF313	99	P	167	P	1	87	P	91	A	1	123	P	62	A	2	Human DNA sequence from clone RP5-963K23 on chromosome 20q13.11-13.2 Contains a KRT18 (Keratin type I, Cytoskeletal 18 (Cytokeratin 18, CK18,CYK18)) pseudogene, a gene for a novel protein, the gene for spermatogenesis associated protein PD1 (KIAA0...
200869_at	ribosomal protein L18a	RPL18A	954	P	394	P	2	1937	P	862	P	2	150	P	615	P	0	Homo sapiens ribosomal protein L18a (RPL18A), mRNA.
200870_at	unr-interacting protein	UNRIP	226	P	303	P	1	564	P	566	P	1	453	P	266	P	2	Homo sapiens unr-interacting protein (UNRIP), mRNA.
200872_at	S100 calcium binding protein A10 (annexin II ligand, calpactin I, light polypeptide (p11))	S100A10	1604	P	645	P	2	2527	P	937	P	3	3931	P	981	P	4	Homo sapiens S100 calcium-binding protein A10 (annexin II ligand, calpactin I, light polypeptide (p11)) (S100A10), mRNA.
200873_s_at	chaperonin containing TCP1, subunit 8 (theta)	CCT8	1617	P	566	P	3	1589	P	672	P	2	1512	P	685	P	2	Homo sapiens chaperonin containing TCP1, subunit 8 (theta) (CCT8), mRNA.
200875_s_at	nucleolar protein 5A (56kDa with KKE/D repeat)	NOL5A	479	P	140	P	3	233	P	189	P	1	577	P	117	P	5	Homo sapiens nucleolar protein (KKED repeat) (NOP56), mRNA.
200876_s_at	proteasome (prosome, macropain) subunit, beta type, 1	PSMB1	1192	P	241	P	5	1162	P	333	P	3	774	P	321	P	2	Homo sapiens proteasome (prosome, macropain) subunit, beta type, 1 (PSMB1), mRNA.
200877_at	chaperonin containing TCP1, subunit 4 (delta)	CCT4	2024	P	425	P	5	2223	P	397	P	6	1349	P	448	P	3	Homo sapiens chaperonin containing TCP1, subunit 4 (delta) (CCT4), mRNA.
200878_at	Homo sapiens clone 23698 mRNA sequence		911	P	83	A	11	234	P	75	A	3	59	A	116	A	1	Homo sapiens clone 23698 mRNA sequence.
200880_at	DnaJ (Hsp40) homolog, subfamily A, member 1	DNAJA1	794	P	712	P	1	645	P	495	P	1	514	P	545	P	1	EST
200882_s_at	proteasome (prosome, macropain) 26S subunit, non-ATPase, 4	PSMD4	921	P	925	P	1	1186	P	1752	P	1	681	P	884	P	1	Homo sapiens proteasome (prosome, macropain) 26S subunit, non-ATPase, 4 (PSMD4), mRNA.
200884_at	creatine kinase, brain	CKB	59	P	46	A	1	314	P	21	A	15	36	P	87	A	0	Homo sapiens creatine kinase, brain (CKB), mRNA.
200885_at	ras homolog gene family, member C	ARHC	443	P	191	A	2	485	P	132	A	4	105	P	184	M	1	Homo sapiens ras homolog gene family, member C (ARHC), mRNA.
200886_s_at	phosphoglycerate mutase 1 (brain)	PGAM1	1361	P	1618	P	1	1415	P	1232	P	1	2580	P	1969	P	1	Homo sapiens phosphoglycerate mutase 1 (brain) (PGAM1), mRNA.
200887_s_at	signal transducer and activator of transcription 1, 91kDa	STAT1	850	P	2066	P	0	891	P	799	P	1	474	P	536	P	1	Homo sapiens signal transducer and activator of transcription 1, 91kD (STAT1), mRNA.
200888_s_at	ribosomal protein L23	RPL23	1961	P	912	P	2	2823	P	1371	P	2	2136	P	1516	P	1	Homo sapiens ribosomal protein L23 (RPL23), mRNA.
200891_s_at	signal sequence receptor, alpha (translocon-associated protein alpha)	SSR1	178	P	295	P	1	235	P	167	P	1	330	P	243	P	1	Homo sapiens signal sequence receptor, alpha (translocon-associated protein alpha) (SSR1), mRNA.
200893_at	splicing factor, arginine/serine-rich 10 (transformer 2 homolog, Drosophila)	SFRS10	1741	P	737	P	2	1078	P	440	P	2	1257	P	389	P	3	Homo sapiens splicing factor, arginineserine-rich (transformer 2 Drosophila homolog) 10 (SFRS10), mRNA.
200895_s_at	FK506 binding protein 4, 59kDa	FKBP4	349	P	307	P	1	431	P	201	P	2	161	P	191	P	1	Homo sapiens FK506-binding protein 4 (59kD) (FKBP4), mRNA.
200896_x_at	hepatoma-derived growth factor (high-mobility group protein 1-like)	HDGF	1173	P	764	P	2	882	P	2350	P	0	624	P	1013	P	1	Homo sapiens hepatoma-derived growth factor (high-mobility group protein 1-like) (HDGF), mRNA.
200899_s_at	meningioma expressed antigen 5 (hyaluronidase)	MGEA5	247	P	614	P	0	161	P	412	P	0	257	P	300	P	1	Homo sapiens meningioma expressed antigen 5 (hyaluronidase) (MGEA5), mRNA.
200901_s_at	mannose-6-phosphate receptor (cation dependent)	M6PR	364	P	301	P	1	240	P	271	P	1	500	P	322	P	2	Homo sapiens mannose-6-phosphate receptor (cation dependent) (M6PR), mRNA.
200902_at	15 kDa selenoprotein	37879	260	P	189	P	1	108	P	127	P	1	114	P	107	P	1	Homo sapiens 15 kDa selenoprotein (SEP15), mRNA.
200903_s_at	S-adenosylhomocysteine hydrolase	AHCY	645	P	66	P	10	970	P	128	P	8	197	P	112	P	2	Homo sapiens S-adenosylhomocysteine hydrolase (AHCY), mRNA.
200904_at	major histocompatibility complex, class I, E	HLA-E	538	P	2488	P	0	442	P	1581	P	0	2732	P	1552	P	2	H.sapiens HLA-E gene.
200909_s_at	ribosomal protein, large P2	RPLP2	1856	P	861	P	2	4981	P	1426	P	3	3966	P	1216	P	3	Homo sapiens ribosomal protein, large P2 (RPLP2), mRNA.
200910_at	chaperonin containing TCP1, subunit 3 (gamma)	CCT3	2159	P	356	P	6	1940	P	277	P	7	894	P	280	P	3	Homo sapiens chaperonin containing TCP1, subunit 3 (gamma) (CCT3), mRNA.
200911_s_at	transforming, acidic coiled-coil containing protein 1	TACC1	219	P	722	P	0	924	P	665	P	1	858	P	778	P	1	Homo sapiens transforming, acidic coiled-coil containing protein 1 (TACC1), mRNA.
200912_s_at	eukaryotic translation initiation factor 4A, isoform 2	EIF4A2	3626	P	1397	P	3	1770	P	1130	P	2	1327	P	1006	P	1	Homo sapiens eukaryotic translation initiation factor 4A, isoform 2 (EIF4A2), mRNA.
200913_at	protein phosphatase 1G (formerly 2C), magnesium-dependent, gamma isoform	PPM1G	103	P	28	A	4	257	P	38	A	7	110	P	34	A	3	Homo sapiens protein phosphatase 1G (formerly 2C), magnesium-dependent, gamma isoform (PPM1G), mRNA.
200918_s_at	signal recognition particle receptor ('docking protein')	SRPR	200	P	200	M	1	175	P	138	A	1	300	P	180	A	2	Homo sapiens signal recognition particle receptor (docking protein) (SRPR), mRNA.
200919_at	polyhomeotic-like 2 (Drosophila)	PHC2	138	P	531	P	0	191	A	336	A	1	503	P	1005	P	1	Homo sapiens early development regulator 2 (homolog of polyhomeotic 2) (EDR2), mRNA.
200921_s_at	B-cell translocation gene 1, anti-proliferative	BTG1	1077	P	912	P	1	408	P	955	P	0	903	P	714	P	1	Homo sapiens B-cell translocation gene 1, anti-proliferative (BTG1), mRNA.
200922_at	KDEL (Lys-Asp-Glu-Leu) endoplasmic reticulum protein retention receptor 1	KDELR1	10	A	33	A	0	39	A	26	A	2	5	A	104	A	0	Homo sapiens KDEL (Lys-Asp-Glu-Leu) endoplasmic reticulum protein retention receptor 1 (KDELR1), mRNA.
200923_at	lectin, galactoside-binding, soluble, 3 binding protein	LGALS3BP	1058	P	87	P	12	86	A	52	A	2	75	M	43	A	2	Homo sapiens lectin, galactoside-binding, soluble, 3 binding protein (galectin 6 binding protein) (LGALS3BP), mRNA.
200924_s_at	solute carrier family 3 (activators of dibasic and neutral amino acid transport), member 2	SLC3A2	168	P	90	A	2	184	P	104	A	2	126	A	18	A	7	Homo sapiens solute carrier family 3 (activators of dibasic and neutral amino acid transport), member 2 (SLC3A2), mRNA.
200925_at	cytochrome c oxidase subunit VIa polypeptide 1	COX6A1	1251	P	538	P	2	1491	P	979	P	2	518	P	642	P	1	Homo sapiens cytochrome c oxidase subunit VIa polypeptide 1 (COX6A1), mRNA.
200926_at	ribosomal protein S23	RPS23	7794	P	3472	P	2	13672	P	5512	P	2	5630	P	4775	P	1	Homo sapiens ribosomal protein S23 (RPS23), mRNA.
200929_at	transmembrane trafficking protein	TMP21	259	P	63	A	4	59	P	183	A	0	55	P	137	A	0	Homo sapiens transmembrane trafficking protein (TMP21), mRNA.
200931_s_at	vinculin	VCL	553	P	1452	P	0	424	P	1103	P	0	2531	P	1082	P	2	Homo sapiens vinculin (VCL), transcript variant meta-VCL, mRNA.
200932_s_at	dynactin 2 (p50)	DCTN2	155	P	222	P	1	242	P	290	A	1	247	P	276	A	1	Homo sapiens dynactin 2 (p50) (DCTN2), mRNA.
200933_x_at	ribosomal protein S4, X-linked	RPS4X	8957	P	3953	P	2	12364	P	3834	P	3	5203	P	3190	P	2	Homo sapiens ribosomal protein S4, X-linked (RPS4X), mRNA.
200934_at	DEK oncogene (DNA binding)	DEK	1899	P	934	P	2	698	P	482	P	1	757	P	598	P	1	Homo sapiens DEK oncogene (DNA binding) (DEK), mRNA.
200936_at	ribosomal protein L8	RPL8	9833	P	1822	P	5	13062	P	2571	P	5	1693	P	2528	P	1	Homo sapiens ribosomal protein L8 (RPL8), mRNA.
200937_s_at	ribosomal protein L5	RPL5	2666	P	702	P	4	4837	P	1428	P	3	1873	P	1316	P	1	Homo sapiens ribosomal protein L5 (RPL5), mRNA.
200940_s_at	arginine-glutamic acid dipeptide (RE) repeats	RERE	134	P	397	P	0	419	P	293	P	1	484	P	720	P	1	Homo sapiens mRNA for RERE, complete cds.
200942_s_at	heat shock factor binding protein 1	HSBP1	86	P	75	A	1	179	P	77	A	2	177	P	178	M	1	Homo sapiens heat shock factor binding protein 1 (HSBP1), mRNA.
200944_s_at	high-mobility group nucleosome binding domain 1	HMGN1	1609	P	754	P	2	1186	P	818	P	1	636	P	717	P	1	Homo sapiens high-mobility group (nonhistone chromosomal) protein 14 (HMG14), mRNA.
200945_s_at	yeast Sec31p homolog	KIAA0905	182	P	122	P	1	174	P	133	P	1	355	P	112	P	3	Homo sapiens yeast Sec31p homolog (KIAA0905), mRNA.
200947_s_at	glutamate dehydrogenase 1	GLUD1	118	A	12	A	10	142	P	18	A	8	81	A	25	A	3	Homo sapiens glutamate dehydrogenase 1 (GLUD1), mRNA.
200948_at	myeloid leukemia factor 2	MLF2	196	P	174	P	1	260	P	250	P	1	142	P	263	P	1	Homo sapiens myeloid leukemia factor 2 (MLF2), mRNA.
200950_at	actin related protein 2/3 complex, subunit 1A, 41kDa	ARPC1A	144	P	122	A	1	159	M	100	A	2	130	A	104	A	1	Homo sapiens actin related protein 23 complex, subunit 1A (41 kD) (ARPC1A), mRNA.
200953_s_at	cyclin D2	CCND2	40	A	251	P	0	144	P	453	P	0	183	P	393	P	0	Homo sapiens cyclin D2 (CCND2), mRNA.
200955_at	inner membrane protein, mitochondrial (mitofilin)	IMMT	190	P	200	P	1	133	P	234	A	1	195	P	233	A	1	Homo sapiens inner membrane protein, mitochondrial (mitofilin) (IMMT), mRNA.
200957_s_at	structure specific recognition protein 1	SSRP1	144	P	275	A	1	276	P	182	A	2	209	P	208	A	1	Homo sapiens structure specific recognition protein 1 (SSRP1), mRNA.
200958_s_at	syndecan binding protein (syntenin)	SDCBP	1480	P	3455	P	0	1154	P	2138	P	1	1461	P	2307	P	1	Homo sapiens syndecan binding protein (syntenin) (SDCBP), mRNA.
200959_at	fusion, derived from t(12;16) malignant liposarcoma	FUS	647	P	334	P	2	518	P	419	P	1	542	P	306	P	2	Homo sapiens fusion, derived from t(12;16) malignant liposarcoma (FUS), mRNA.
200961_at	selenophosphate synthetase 2	SPS2	395	P	280	P	1	265	P	167	P	2	465	P	370	P	1	Homo sapiens selenophosphate synthetase 2 (SPS2), mRNA.
200962_at	Homo sapiens cDNA FLJ36224 fis, clone THYMU2000990.		110	P	187	P	1	273	P	219	P	1	140	P	202	M	1	EST
200964_at	ubiquitin-activating enzyme E1 (A1S9T and BN75 temperature sensitivity complementing)	UBE1	300	P	286	P	1	197	P	80	A	2	202	P	128	A	2	Homo sapiens ubiquitin-activating enzyme E1 (A1S9T and BN75 temperature sensitivity complementing) (UBE1), mRNA.
200965_s_at	actin binding LIM protein 1	ABLIM1	251	P	181	P	1	129	P	124	A	1	122	P	232	P	1	Homo sapiens actin binding LIM protein 1 (ABLIM), transcript variant ABLIM-s, mRNA.
200966_x_at	aldolase A, fructose-bisphosphate	ALDOA	1432	P	956	P	1	2263	P	1041	P	2	1276	P	1409	P	1	Homo sapiens aldolase A, fructose-bisphosphate (ALDOA), mRNA.
200968_s_at	peptidylprolyl isomerase B (cyclophilin B)	PPIB	469	P	20	A	24	677	P	198	A	3	201	P	96	A	2	Homo sapiens peptidylprolyl isomerase B (cyclophilin B) (PPIB), mRNA.
200971_s_at	stress-associated endoplasmic reticulum protein 1	SERP1	1799	P	1405	P	1	1745	P	1167	P	1	1831	P	1095	P	2	Homo sapiens stress-associated endoplasmic reticulum protein 1; ribosome associated membrane protein 4 (SERP1), mRNA.
200972_at	tetraspan 3	TSPAN-3	565	P	156	P	4	487	P	59	A	8	336	P	93	A	4	Homo sapiens, tetraspan 3, clone MGC:965, mRNA, complete cds.
200974_at	actin, alpha 2, smooth muscle, aorta	ACTA2	34	A	119	P	0	76	P	76	P	1	36	P	126	P	0	Homo sapiens actin, alpha 2, smooth muscle, aorta (ACTA2), mRNA.
200975_at	palmitoyl-protein thioesterase 1 (ceroid-lipofuscinosis, neuronal 1, infantile)	PPT1	1318	P	806	P	2	408	P	474	P	1	1150	P	437	P	3	Homo sapiens palmitoyl-protein thioesterase 1 (ceroid-lipofuscinosis, neuronal 1, infantile) (PPT1), mRNA.
200976_s_at	Tax1 (human T-cell leukemia virus type I) binding protein 1	TAX1BP1	1023	P	754	P	1	1236	P	2113	P	1	1266	P	1015	P	1	Homo sapiens Tax1 (human T-cell leukemia virus type I) binding protein 1 (TAX1BP1), mRNA.
200978_at	malate dehydrogenase 1, NAD (soluble)	MDH1	390	P	201	A	2	806	P	179	P	5	457	P	209	A	2	Homo sapiens malate dehydrogenase 1, NAD (soluble) (MDH1), mRNA.
200980_s_at	pyruvate dehydrogenase (lipoamide) alpha 1	PDHA1	312	P	297	P	1	451	P	380	A	1	459	P	301	A	2	Homo sapiens pyruvate dehydrogenase (lipoamide) alpha 1 (PDHA1), mRNA.
200982_s_at	annexin A6	ANXA6	414	P	430	P	1	115	A	433	P	0	146	P	425	P	0	Homo sapiens annexin A6 (ANXA6), transcript variant 1, mRNA.
200984_s_at	CD59 antigen p18-20 (antigen identified by monoclonal antibodies 16.3A5, EJ16, EJ30, EL32 and G344)	CD59	777	P	220	P	4	373	P	218	P	2	175	P	216	P	1	Human mRNA for CD59, an LY-6-like protein regulating complement membrane attack.
200986_at	serine (or cysteine) proteinase inhibitor, clade G (C1 inhibitor), member 1, (angioedema, hereditary)	SERPING1	72	A	362	P	0	66	A	81	A	1	58	P	55	A	1	Homo sapiens serine (or cysteine) proteinase inhibitor, clade G (C1 inhibitor), member 1 (SERPING1), mRNA.
200988_s_at	proteasome (prosome, macropain) activator subunit 3 (PA28 gamma; Ki)	PSME3	43	P	56	A	1	58	M	128	A	0	52	P	67	A	1	Homo sapiens proteasome (prosome, macropain) activator subunit 3 (PA28 gamma; Ki) (PSME3), mRNA.
200989_at	hypoxia-inducible factor 1, alpha subunit (basic helix-loop-helix transcription factor)	HIF1A	307	P	2043	P	0	1001	P	1003	P	1	949	P	1372	P	1	Homo sapiens hypoxia-inducible factor 1, alpha subunit (basic helix-loop-helix transcription factor) (HIF1A), mRNA.
200990_at	tripartite motif-containing 28	TRIM28	141	P	15	A	9	118	P	17	A	7	228	P	27	A	9	Homo sapiens KRAB-associated protein 1 (TIF1B), mRNA.
200992_at	importin 7	IPO7	530	P	99	P	5	307	P	114	A	3	70	P	139	M	1	Homo sapiens mRNA; cDNA DKFZp434A179 (from clone DKFZp434A179); partial cds.
200996_at	ARP3 actin-related protein 3 homolog (yeast)	ACTR3	323	P	882	P	0	839	P	938	P	1	704	P	558	P	1	Homo sapiens ARP3 (actin-related protein 3, yeast) homolog (ACTR3), mRNA.
200997_at	RNA binding motif protein 4	RBM4	644	P	291	P	2	806	P	311	A	3	468	P	382	P	1	Homo sapiens RNA binding motif protein 4 (RBM4), mRNA.
200998_s_at	cytoskeleton-associated protein 4	CKAP4	337	P	256	P	1	232	P	357	P	1	82	P	400	P	0	EST
201000_at	alanyl-tRNA synthetase	AARS	465	P	194	A	2	360	P	216	A	2	335	P	276	A	1	Homo sapiens alanyl-tRNA synthetase (AARS), mRNA.
201002_s_at	ubiquitin-conjugating enzyme E2 variant 1	UBE2V1	121	P	157	P	1	182	P	498	P	0	388	P	242	P	2	Homo sapiens DNA-binding protein (CROC-1B) mRNA, complete cds.
201004_at	signal sequence receptor, delta (translocon-associated protein delta)	SSR4	855	P	439	P	2	1272	P	489	P	3	555	P	515	P	1	Homo sapiens signal sequence receptor, delta (translocon-associated protein delta) (SSR4), mRNA.
201005_at	CD9 antigen (p24)	CD9	1214	P	182	P	7	1025	P	73	A	14	317	P	159	P	2	Homo sapiens CD9 antigen (p24) (CD9), mRNA.
201007_at	hydroxyacyl-Coenzyme A dehydrogenase/3-ketoacyl-Coenzyme A thiolase/enoyl-Coenzyme A hydratase (trifunctional protein), beta subunit	HADHB	907	P	557	P	2	955	P	618	P	2	1066	P	752	P	1	Homo sapiens hydroxyacyl-Coenzyme A dehydrogenase3-ketoacyl-Coenzyme A thiolaseenoyl-Coenzyme A hydratase (trifunctional protein), beta subunit (HADHB), mRNA.
201010_s_at	thioredoxin interacting protein	TXNIP	1298	P	7474	P	0	2062	P	4643	P	0	3996	P	5113	P	1	Homo sapiens upregulated by 1,25-dihydroxyvitamin D-3 (VDUP1), mRNA.
201011_at	ribophorin I	RPN1	212	P	93	A	2	202	P	114	A	2	199	P	85	A	2	Homo sapiens ribophorin I (RPN1), mRNA.
201012_at	annexin A1	ANXA1	255	P	622	P	0	318	P	510	P	1	2726	P	840	P	3	Homo sapiens annexin A1 (ANXA1), mRNA.
201013_s_at	phosphoribosylaminoimidazole carboxylase, phosphoribosylaminoimidazole succinocarboxamide synthetase	PAICS	333	P	74	P	5	442	P	78	A	6	101	P	106	A	1	EST
201015_s_at	junction plakoglobin	JUP	560	P	8	A	73	33	A	18	A	2	100	A	16	A	6	Homo sapiens junction plakoglobin (JUP), transcript variant 2, mRNA.
201018_at	Homo sapiens mRNA full length insert cDNA clone EUROIMAGE 39515.		330	P	154	P	2	149	P	113	P	1	72	P	81	M	1	Homo sapiens mRNA full length insert cDNA clone EUROIMAGE 39515.
201020_at	tyrosine 3-monooxygenase/tryptophan 5-monooxygenase activation protein, eta polypeptide	YWHAH	68	P	82	P	1	77	P	78	P	1	69	P	86	P	1	Homo sapiens tyrosine 3-monooxygenasetryptophan 5-monooxygenase activation protein, eta polypeptide (YWHAH), mRNA.
201022_s_at	destrin (actin depolymerizing factor)	DSTN	1983	P	196	P	10	1070	P	169	P	6	565	P	142	P	4	Homo sapiens destrin (actin depolymerizing factor) (ADF), mRNA.
201023_at	TAF7 RNA polymerase II, TATA box binding protein (TBP)-associated factor, 55kDa	TAF7	812	P	649	P	1	578	P	523	P	1	506	P	406	P	1	Homo sapiens TATA box binding protein (TBP)-associated factor, RNA polymerase II, F, 55kD (TAF2F), mRNA.
201029_s_at	CD99 antigen	CD99	970	P	1095	P	1	854	P	1510	P	1	2138	P	1368	P	2	Homo sapiens antigen identified by monoclonal antibodies 12E7, F21 and O13 (MIC2), mRNA.
201030_x_at	lactate dehydrogenase B	LDHB	1012	P	768	P	1	1526	P	931	P	2	1133	P	581	P	2	Homo sapiens lactate dehydrogenase B (LDHB), mRNA.
201031_s_at	heterogeneous nuclear ribonucleoprotein H1 (H)	HNRPH1	843	P	547	P	2	280	P	446	P	1	680	P	338	P	2	Homo sapiens heterogeneous nuclear ribonucleoprotein H1 (H) (HNRPH1), mRNA.
201032_at	bladder cancer associated protein	BLCAP	820	P	184	P	4	312	P	514	P	1	528	P	350	P	2	Homo sapiens bladder cancer associated protein (BLCAP), mRNA.
201034_at	adducin 3 (gamma)	ADD3	108	P	640	P	0	369	P	673	P	1	732	P	513	P	1	EST
201037_at	phosphofructokinase, platelet	PFKP	21	A	155	P	0	370	P	247	P	1	316	P	123	A	3	Homo sapiens phosphofructokinase, platelet (PFKP), mRNA.
201039_s_at	RAD23 homolog A (S. cerevisiae)	RAD23A	76	A	156	A	0	114	A	571	P	0	51	A	329	A	0	EST
201040_at	guanine nucleotide binding protein (G protein), alpha inhibiting activity polypeptide 2	GNAI2	74	A	494	P	0	28	A	240	P	0	204	P	402	P	1	Homo sapiens guanine nucleotide binding protein (G protein), alpha inhibiting activity polypeptide 2 (GNAI2), mRNA.
201041_s_at	dual specificity phosphatase 1	DUSP1	1838	P	4956	P	0	818	P	2133	P	0	5231	P	7743	P	1	Homo sapiens dual specificity phosphatase 1 (DUSP1), mRNA.
201042_at	transglutaminase 2 (C polypeptide, protein-glutamine-gamma-glutamyltransferase)	TGM2	137	P	82	A	2	248	P	168	A	1	73	A	82	A	1	Human DNA sequence from clone RP5-1054A22 on chromosome 20q11.22-12 Contains two isoforms of the gene for TGM2 (transglutaminase 2 (C polypeptide, protein-glutamine-gamma-glutamyltransferase), ESTs, STSs, GSSs and a CpG island
201049_s_at	ribosomal protein S18	RPS18	7836	P	2619	P	3	15151	P	2322	P	7	7208	P	2720	P	3	Homo sapiens ribosomal protein S18 (RPS18), mRNA.
201050_at	phospholipase D3	PLD3	59	A	112	A	1	54	A	80	A	1	75	M	27	A	3	Homo sapiens similar to vaccinia virus HindIII K4L ORF (HU-K4), mRNA.
201051_at	acidic (leucine-rich) nuclear phosphoprotein 32 family, member A	ANP32A	566	P	1375	P	0	545	P	877	P	1	226	P	897	P	0	EST
201052_s_at	proteasome (prosome, macropain) inhibitor subunit 1 (PI31)	PSMF1	152	P	337	P	0	118	P	947	P	0	154	P	793	P	0	EST
201055_s_at	heterogeneous nuclear ribonucleoprotein A0	HNRPA0	181	P	160	P	1	113	P	171	P	1	114	P	247	P	0	Homo sapiens heterogeneous nuclear ribonucleoprotein A0 (HNRPA0), mRNA.
201057_s_at	golgi autoantigen, golgin subfamily b, macrogolgin (with transmembrane signal), 1	GOLGB1	683	P	304	P	2	453	P	190	P	2	279	P	233	P	1	Homo sapiens golgi autoantigen, golgin subfamily b, macrogolgin (with transmembrane signal), 1 (GOLGB1), mRNA.
201058_s_at	myosin, light polypeptide 9, regulatory	MYL9	2	A	7	A	0	2	A	11	A	0	71	A	10	A	7	Homo sapiens myosin regulatory light chain 2, smooth muscle isoform (MYRL2), mRNA.
201059_at	ems1 sequence (mammary tumor and squamous cell carcinoma-associated (p80/85 src substrate)	EMS1	1208	P	434	P	3	756	P	316	P	2	438	P	354	P	1	Homo sapiens ems1 sequence (mammary tumor and squamous cell carcinoma-associated (p8085 src substrate) (EMS1), mRNA.
201063_at	reticulocalbin 1, EF-hand calcium binding domain	RCN1	561	P	98	A	6	277	P	102	A	3	124	P	60	A	2	Homo sapiens reticulocalbin 1, EF-hand calcium binding domain (RCN1), mRNA.
201064_s_at	poly(A) binding protein, cytoplasmic 4 (inducible form)	PABPC4	88	P	164	A	1	146	P	159	A	1	262	P	252	A	1	Homo sapiens poly(A)-binding protein, cytoplasmic 4 (inducible form) (PABPC4), mRNA.
201066_at	cytochrome c-1	CYC1	447	P	114	A	4	425	P	33	A	13	99	A	51	A	2	Homo sapiens cytochrome c-1 (CYC1), mRNA.
201068_s_at	proteasome (prosome, macropain) 26S subunit, ATPase, 2	PSMC2	888	P	416	P	2	963	P	464	P	2	957	P	377	P	3	Homo sapiens proteasome (prosome, macropain) 26S subunit, ATPase, 2 (PSMC2), mRNA.
201069_at	matrix metalloproteinase 2 (gelatinase A, 72kDa gelatinase, 72kDa type IV collagenase)	MMP2	40	A	90	A	0	50	A	190	P	0	30	A	59	A	1	Homo sapiens matrix metalloproteinase 2 (gelatinase A, 72kD gelatinase, 72kD type IV collagenase) (MMP2), mRNA.
201075_s_at	SWI/SNF related, matrix associated, actin dependent regulator of chromatin, subfamily c, member 1	SMARCC1	30	P	39	A	1	66	A	77	A	1	14	A	72	A	0	Homo sapiens SWISNF related, matrix associated, actin dependent regulator of chromatin, subfamily c, member 1 (SMARCC1), mRNA.
201077_s_at	NHP2 non-histone chromosome protein 2-like 1 (S. cerevisiae)	NHP2L1	836	P	276	P	3	1059	P	304	P	3	592	P	228	P	3	Homo sapiens 15.5 kD RNA binding protein mRNA, complete cds.
201078_at	transmembrane 9 superfamily member 2	TM9SF2	319	P	340	P	1	187	P	268	P	1	489	P	304	P	2	Homo sapiens transmembrane 9 superfamily member 2 (TM9SF2), mRNA.
201079_at	synaptogyrin 2	SYNGR2	1020	P	122	A	8	304	P	164	A	2	327	P	170	A	2	Homo sapiens synaptogyrin 2 (SYNGR2), mRNA.
201080_at	phosphatidylinositol-4-phosphate 5-kinase, type II, beta	PIP5K2B	129	A	97	A	1	102	A	127	A	1	71	A	145	A	0	EST
201082_s_at	dynactin 1 (p150, glued homolog, Drosophila)	DCTN1	6	A	9	A	1	2	A	4	A	0	47	P	6	A	8	Homo sapiens dynactin 1 (p150, Glued (Drosophila) homolog) (DCTN1), transcript variant 1, mRNA.
201087_at	paxillin	PXN	94	A	373	P	0	165	P	362	P	0	273	P	492	P	1	Homo sapiens paxillin (PXN), mRNA.
201088_at	karyopherin alpha 2 (RAG cohort 1, importin alpha 1)	KPNA2	983	P	443	P	2	374	P	149	P	3	418	P	215	P	2	Homo sapiens karyopherin alpha 2 (RAG cohort 1, importin alpha 1) (KPNA2), mRNA.
201089_at	ATPase, H+ transporting, lysosomal 56/58kDa, V1 subunit B, isoform 2	ATP6V1B2	72	A	461	P	0	147	P	312	P	0	451	P	514	P	1	Homo sapiens ATPase, H+ transporting, lysosomal (vacuolar proton pump), beta polypeptide, 5658kD, isoform 2 (ATP6B2), mRNA.
201092_at	retinoblastoma binding protein 7	RBBP7	709	P	351	P	2	640	P	419	P	2	428	P	302	P	1	Homo sapiens retinoblastoma-binding protein 7 (RBBP7), mRNA.
201094_at	ribosomal protein S29	RPS29	8341	P	9186	P	1	11263	P	12142	P	1	6076	P	11659	P	1	Homo sapiens ribosomal protein S29 (RPS29), mRNA.
201095_at	death-associated protein	DAP	116	P	18	A	6	111	A	143	A	1	131	P	149	A	1	Homo sapiens death-associated protein (DAP), mRNA.
201097_s_at	ADP-ribosylation factor 4	ARF4	960	P	881	P	1	1309	P	474	P	3	664	P	398	P	2	Homo sapiens ADP-ribosylation factor 4 (ARF4), mRNA.
201098_at	coatomer protein complex, subunit beta 2 (beta prime)	COPB2	299	P	152	P	2	212	P	141	P	2	176	P	207	P	1	Homo sapiens coatomer protein complex, subunit beta 2 (beta prime) (COPB2), mRNA.
201099_at	Homo sapiens, clone IMAGE:3857207, mRNA		156	P	142	P	1	129	P	196	P	1	186	P	198	P	1	EST
201102_s_at	phosphofructokinase, liver	PFKL	72	P	141	P	1	99	P	197	P	1	44	P	187	P	0	Homo sapiens phosphofructokinase, liver (PFKL), mRNA.
201105_at	lectin, galactoside-binding, soluble, 1 (galectin 1)	LGALS1	169	P	568	P	0	397	P	473	P	1	481	P	762	P	1	Homo sapiens lectin, galactoside-binding, soluble, 1 (galectin 1) (LGALS1), mRNA.
201106_at	glutathione peroxidase 4 (phospholipid hydroperoxidase)	GPX4	614	P	450	P	1	1616	P	1117	P	1	361	P	885	P	0	Homo sapiens glutathione peroxidase 4 (phospholipid hydroperoxidase) (GPX4), mRNA.
201110_s_at	thrombospondin 1	THBS1	8	A	10	A	1	31	P	2	A	19	1	A	2	A	0	Homo sapiens thrombospondin 1 (THBS1), mRNA.
201111_at	CSE1 chromosome segregation 1-like (yeast)	CSE1L	635	P	107	P	6	297	P	86	A	3	133	P	112	P	1	Homo sapiens brain cellular apoptosis susceptibility protein (CSE1) mRNA, complete cds.
201113_at	Tu translation elongation factor, mitochondrial	TUFM	567	P	113	A	5	436	P	19	A	23	315	P	54	A	6	Homo sapiens Tu translation elongation factor, mitochondrial (TUFM), mRNA.
201115_at	polymerase (DNA directed), delta 2, regulatory subunit 50kDa	POLD2	112	P	34	A	3	134	P	5	A	25	55	A	13	A	4	Homo sapiens polymerase (DNA directed), delta 2, regulatory subunit (50kD) (POLD2), mRNA.
201117_s_at	carboxypeptidase E	CPE	12	A	24	A	1	182	P	33	A	6	2	A	4	A	0	Homo sapiens carboxypeptidase E (CPE), mRNA.
201118_at	phosphogluconate dehydrogenase	PGD	58	A	92	A	1	95	A	254	A	0	106	P	197	A	1	Homo sapiens phosphogluconate dehydrogenase (PGD), mRNA.
201119_s_at	cytochrome c oxidase subunit VIII	COX8	1150	P	393	P	3	1681	P	565	P	3	421	P	657	P	1	Homo sapiens cytochrome c oxidase subunit VIII (COX8), nuclear gene encoding mitochondrial protein, mRNA.
201121_s_at	progesterone receptor membrane component 1	PGRMC1	536	P	574	P	1	431	P	799	P	1	447	P	676	A	1	Homo sapiens progesterone binding protein (HPR6.6), mRNA.
201124_at	integrin, beta 5	ITGB5	266	P	92	A	3	65	P	116	A	1	46	A	133	A	0	EST
201126_s_at	mannosyl (alpha-1,3-)-glycoprotein beta-1,2-N-acetylglucosaminyltransferase	MGAT1	135	P	303	P	0	102	A	157	A	1	515	P	290	A	2	Homo sapiens mannosyl (alpha-1,3-)-glycoprotein beta-1,2-N-acetylglucosaminyltransferase (MGAT1), mRNA.
201128_s_at	ATP citrate lyase	ACLY	1311	P	411	P	3	659	P	311	P	2	766	P	366	P	2	Homo sapiens ATP citrate lyase (ACLY), mRNA.
201129_at	splicing factor, arginine/serine-rich 7, 35kDa	SFRS7	516	P	231	P	2	424	P	136	P	3	111	P	176	P	1	Homo sapiens splicing factor, arginineserine-rich 7 (35kD) (SFRS7), mRNA.
201131_s_at	cadherin 1, type 1, E-cadherin (epithelial)	CDH1	62	P	5	A	12	248	P	46	A	5	118	P	7	A	17	Homo sapiens cadherin 1, type 1, E-cadherin (epithelial) (CDH1), mRNA.
201132_at	heterogeneous nuclear ribonucleoprotein H2 (H')	HNRPH2	70	P	48	P	1	98	P	101	P	1	126	P	62	P	2	Homo sapiens heterogeneous nuclear ribonucleoprotein H2 (H) (HNRPH2), mRNA.
201135_at	enoyl Coenzyme A hydratase, short chain, 1, mitochondrial	ECHS1	540	P	180	A	3	1507	P	203	A	7	415	P	205	A	2	Homo sapiens enoyl Coenzyme A hydratase, short chain, 1, mitochondrial (ECHS1), nuclear gene encoding mitochondrial protein, mRNA.
201136_at	proteolipid protein 2 (colonic epithelium-enriched)	PLP2	322	P	314	P	1	340	P	240	P	1	796	P	432	P	2	Homo sapiens proteolipid protein 2 (colonic epithelium-enriched) (PLP2), mRNA.
201137_s_at	major histocompatibility complex, class II, DP beta 1	HLA-DPB1	201	P	669	P	0	658	P	795	P	1	2904	P	1448	P	2	Homo sapiens major histocompatibility complex, class II, DP beta 1 (HLA-DPB1), mRNA.
201138_s_at	Sjogren syndrome antigen B (autoantigen La)	SSB	50	P	62	A	1	176	P	41	P	4	58	P	119	A	0	EST
201140_s_at	RAB5C, member RAS oncogene family	RAB5C	74	P	133	P	1	64	P	94	P	1	119	P	120	P	1	Homo sapiens RAB5C, member RAS oncogene family (RAB5C), mRNA.
201141_at	glycoprotein (transmembrane) nmb	GPNMB	40	A	30	P	1	38	A	68	A	1	96	P	7	A	14	Homo sapiens glycoprotein (transmembrane) nmb (GPNMB), mRNA.
201142_at	eukaryotic translation initiation factor 2, subunit 1 alpha, 35kDa	EIF2S1	66	P	72	P	1	88	P	51	A	2	71	P	90	P	1	EST
201145_at	HS1 binding protein	HAX1	530	P	310	P	2	1023	P	263	P	4	206	P	277	P	1	Homo sapiens HS1 binding protein (HAX1), mRNA.
201146_at	nuclear factor (erythroid-derived 2)-like 2	NFE2L2	117	P	255	P	0	115	P	102	P	1	65	P	156	P	0	Homo sapiens nuclear factor (erythroid-derived 2)-like 2 (NFE2L2), mRNA.
201149_s_at	tissue inhibitor of metalloproteinase 3 (Sorsby fundus dystrophy, pseudoinflammatory)	TIMP3	122	A	86	A	1	70	A	129	A	1	31	A	121	A	0	Human tissue inhibitor of metalloproteinase-3 mRNA, complete cds.
201153_s_at	muscleblind-like (Drosophila)	MBNL1	82	P	512	P	0	109	P	575	P	0	414	P	436	P	1	Homo sapiens muscleblind (Drosophila)-like (MBNL), mRNA.
201157_s_at	N-myristoyltransferase 1	NMT1	424	P	130	P	3	174	P	169	P	1	334	P	182	P	2	Homo sapiens myristoyl CoA:protein N-myristoyltransferase mRNA, complete cds.
201160_s_at	cold shock domain protein A	CSDA	387	P	2515	P	0	1400	P	5852	P	0	777	P	4199	P	0	EST
201163_s_at	insulin-like growth factor binding protein 7	IGFBP7	4	A	137	P	0	20	P	104	P	0	107	P	38	P	3	Homo sapiens insulin-like growth factor binding protein 7 (IGFBP7), mRNA.
201166_s_at	pumilio homolog 1 (Drosophila)	PUM1	400	P	392	P	1	468	P	232	P	2	554	P	310	P	2	Homo sapiens pumilio (Drosophila) homolog 1 (PUM1), mRNA.
201170_s_at	basic helix-loop-helix domain containing, class B, 2	BHLHB2	694	P	285	P	2	102	A	253	P	0	238	P	269	A	1	Homo sapiens basic helix-loop-helix domain containing, class B, 2 (BHLHB2), mRNA.
201174_s_at	telomeric repeat binding factor 2, interacting protein	TERF2IP	215	P	407	P	1	327	P	1392	P	0	413	P	547	P	1	Homo sapiens TRF2-interacting telomeric RAP1 protein (RAP1), mRNA.
201176_s_at	archain 1	ARCN1	186	P	254	P	1	272	P	153	P	2	141	P	307	P	0	Homo sapiens archain 1 (ARCN1), mRNA.
201177_s_at	SUMO-1 activating enzyme subunit 2	UBA2	176	P	69	P	3	170	P	102	P	2	149	P	41	A	4	Homo sapiens SUMO-1 activating enzyme subunit 2 (UBA2), mRNA.
201178_at	F-box only protein 7	FBXO7	266	P	3264	P	0	1209	P	10620	P	0	826	P	6083	P	0	Homo sapiens F-box only protein 7 (FBXO7), mRNA.
201180_s_at	guanine nucleotide binding protein (G protein), alpha inhibiting activity polypeptide 3	GNAI3	959	P	602	P	2	637	P	429	P	1	951	P	571	P	2	Human stimulatory G protein (of receptor-regulated K+ channels) alpha subunit mRNA, complete cds.
201183_s_at	chromodomain helicase DNA binding protein 4	CHD4	164	P	216	P	1	224	P	394	P	1	299	P	268	P	1	EST
201185_at	protease, serine, 11 (IGF binding)	PRSS11	81	A	171	A	0	107	A	159	A	1	202	P	221	A	1	Homo sapiens protease, serine, 11 (IGF binding) (PRSS11), mRNA.
201186_at	low density lipoprotein-related protein-associated protein 1 (alpha-2-macroglobulin receptor-associated protein 1)	LRPAP1	187	P	338	P	1	467	P	400	A	1	1476	P	580	P	3	Homo sapiens low density lipoprotein-related protein-associated protein 1 (alpha-2-macroglobulin receptor-associated protein 1) (LRPAP1), mRNA.
201189_s_at	inositol 1,4,5-triphosphate receptor, type 3	ITPR3	89	P	90	A	1	118	A	15	A	8	75	P	37	A	2	Homo sapiens inositol 1,4,5-triphosphate receptor, type 3 (ITPR3), mRNA.
201192_s_at	phosphotidylinositol transfer protein	PITPN	100	P	210	P	0	206	P	184	P	1	252	P	304	P	1	Homo sapiens phosphotidylinositol transfer protein (PITPN), mRNA.
201193_at	isocitrate dehydrogenase 1 (NADP+), soluble	IDH1	496	P	216	P	2	1358	P	126	M	11	326	P	217	P	2	Homo sapiens isocitrate dehydrogenase 1 (NADP+), soluble (IDH1), mRNA.
201194_at	selenoprotein W, 1	SEPW1	604	P	250	P	2	894	P	236	M	4	114	P	269	P	0	Homo sapiens selenoprotein W, 1 (SEPW1), mRNA.
201195_s_at	solute carrier family 7 (cationic amino acid transporter, y+ system), member 5	SLC7A5	164	A	89	A	2	45	A	216	P	0	75	A	107	A	1	Homo sapiens mRNA for L-type amino acid transporter 1, complete cds.
201197_at	S-adenosylmethionine decarboxylase 1	AMD1	81	P	85	P	1	321	P	92	P	3	134	P	143	P	1	Homo sapiens S-adenosylmethionine decarboxylase 1 (AMD1), mRNA.
201198_s_at	proteasome (prosome, macropain) 26S subunit, non-ATPase, 1	PSMD1	379	P	225	P	2	511	P	310	P	2	332	P	231	M	1	EST
201200_at	cellular repressor of E1A-stimulated genes	CREG	822	P	667	P	1	479	P	2078	P	0	1117	P	907	P	1	Homo sapiens cellular repressor of E1A-stimulated genes (CREG), mRNA.
201201_at	cystatin B (stefin B)	CSTB	686	P	228	P	3	1106	P	198	P	6	1556	P	580	P	3	Homo sapiens cystatin B (stefin B) (CSTB), mRNA.
201202_at	proliferating cell nuclear antigen	PCNA	457	P	116	P	4	227	P	127	P	2	133	P	69	A	2	Homo sapiens proliferating cell nuclear antigen (PCNA), mRNA.
201205_at	ribosome binding protein 1 homolog 180kDa (dog)	RRBP1	70	P	124	A	1	76	A	170	P	0	52	A	209	A	0	Homo sapiens ES130 mRNA, complete cds.
201207_at	tumor necrosis factor, alpha-induced protein 1 (endothelial)	TNFAIP1	243	P	115	A	2	159	A	21	A	8	91	A	25	A	4	Homo sapiens tumor necrosis factor, alpha-induced protein 1 (endothelial) (TNFAIP1), mRNA.
201209_at	histone deacetylase 1	HDAC1	226	P	264	P	1	463	P	209	P	2	247	P	171	P	1	Homo sapiens histone deacetylase 1 (HDAC1), mRNA.
201210_at	DEAD/H (Asp-Glu-Ala-Asp/His) box polypeptide 3	DDX3	357	P	560	P	1	229	P	242	P	1	614	P	293	P	2	Homo sapiens DEADH (Asp-Glu-Ala-AspHis) box polypeptide 3 (DDX3), transcript variant 2, mRNA.
201212_at	legumain	LGMN	117	P	13	A	9	165	P	4	A	44	13	A	8	A	2	Homo sapiens mRNA for cysteine protease, complete cds.
201215_at	plastin 3 (T isoform)	PLS3	16	A	2	A	10	17	A	11	A	2	45	P	8	A	6	Homo sapiens plastin 3 (T isoform) (PLS3), mRNA.
201216_at	chromosome 12 open reading frame 8	C12orf8	793	P	720	P	1	801	P	404	P	2	375	P	500	P	1	Homo sapiens endoplasmic reticulum lumenal protein (ERP28), mRNA.
201221_s_at	small nuclear ribonucleoprotein 70kDa polypeptide (RNP antigen)	SNRP70	644	P	319	M	2	566	P	418	M	1	544	P	359	A	2	Homo sapiens small nuclear ribonucleoprotein 70kD polypeptide (RNP antigen) (SNRP70), mRNA.
201222_s_at	RAD23 homolog B (S. cerevisiae)	RAD23B	140	P	132	P	1	140	P	145	P	1	58	P	105	P	1	EST
201225_s_at	serine/arginine repetitive matrix 1	SRRM1	90	P	143	P	1	110	P	89	P	1	176	P	85	P	2	Homo sapiens SerArg-related nuclear matrix protein (plenty of prolines 101-like) (SRM160), mRNA.
201227_s_at	NADH dehydrogenase (ubiquinone) 1 beta subcomplex, 8, 19kDa	NDUFB8	1807	P	1282	P	1	2092	P	955	P	2	2907	P	951	P	3	Homo sapiens NADH dehydrogenase (ubiquinone) 1 beta subcomplex, 8 (19kD, ASHI) (NDUFB8), mRNA.
201229_s_at	ariadne homolog 2 (Drosophila)	ARIH2	40	P	13	A	3	80	P	29	A	3	25	P	82	A	0	Homo sapiens, ariadne (Drosophila) homolog 2, clone MGC:8671, mRNA, complete cds.
201231_s_at	enolase 1, (alpha)	ENO1	1182	P	552	P	2	2707	P	659	P	4	1070	P	618	P	2	Homo sapiens enolase 1, (alpha) (ENO1), mRNA.
201232_s_at	proteasome (prosome, macropain) 26S subunit, non-ATPase, 13	PSMD13	640	P	411	P	2	585	P	390	P	1	348	P	370	P	1	Homo sapiens proteasome (prosome, macropain) 26S subunit, non-ATPase, 13 (PSMD13), mRNA.
201234_at	integrin-linked kinase	ILK	180	A	309	A	1	295	A	353	A	1	286	P	382	A	1	Homo sapiens integrin-linked kinase (ILK), mRNA.
201236_s_at	BTG family, member 2	BTG2	740	P	602	P	1	199	P	435	A	0	484	P	386	P	1	Homo sapiens BTG family, member 2 (BTG2), mRNA.
201237_at	capping protein (actin filament) muscle Z-line, alpha 2	CAPZA2	81	P	114	P	1	71	P	85	A	1	221	P	106	P	2	EST
201241_at	DEAD/H (Asp-Glu-Ala-Asp/His) box polypeptide 1	DDX1	504	P	131	A	4	635	P	96	A	7	258	P	162	A	2	Homo sapiens DEADH (Asp-Glu-Ala-AspHis) box polypeptide 1 (DDX1), mRNA.
201242_s_at	ATPase, Na+/K+ transporting, beta 1 polypeptide	ATP1B1	1325	P	46	P	29	78	P	57	P	1	86	P	26	A	3	Homo sapiens, ATPase, Na+K+ transporting, beta 1 polypeptide, clone MGC:1798, mRNA, complete cds.
201244_s_at	v-raf-1 murine leukemia viral oncogene homolog 1	RAF1	181	P	499	P	0	212	P	355	P	1	724	P	469	P	2	Homo sapiens v-raf-1 murine leukemia viral oncogene homolog 1 (RAF1), mRNA.
201247_at	sterol regulatory element binding transcription factor 2	SREBF2	77	A	167	A	0	161	A	239	A	1	60	A	192	A	0	EST
201250_s_at	solute carrier family 2 (facilitated glucose transporter), member 1	SLC2A1	264	P	170	P	2	154	P	396	P	0	147	P	244	A	1	Homo sapiens solute carrier family 2 (facilitated glucose transporter), member 1 (SLC2A1), mRNA.
201251_at	pyruvate kinase, muscle	PKM2	45	A	22	A	2	25	A	61	A	0	105	A	98	A	1	Homo sapiens pyruvate kinase, muscle (PKM2), mRNA.
201252_at	proteasome (prosome, macropain) 26S subunit, ATPase, 4	PSMC4	158	A	102	A	2	120	A	33	A	4	40	M	70	A	1	Homo sapiens proteasome (prosome, macropain) 26S subunit, ATPase, 4 (PSMC4), mRNA.
201253_s_at	CDP-diacylglycerol--inositol 3-phosphatidyltransferase (phosphatidylinositol synthase)	CDIPT	953	P	805	P	1	412	P	1105	P	0	489	P	972	P	1	Homo sapiens CDP-diacylglycerol--inositol 3-phosphatidyltransferase (phosphatidylinositol synthase) (CDIPT), mRNA.
201256_at	cytochrome c oxidase subunit VIIa polypeptide 2 like	COX7A2L	853	P	555	P	2	1535	P	1344	P	1	738	P	576	P	1	Homo sapiens cytochrome c oxidase subunit VIIa polypeptide 2 like (COX7A2L), mRNA.
201257_x_at	ribosomal protein S3A	RPS3A	5770	P	4416	P	1	12813	P	10324	P	1	7168	P	8058	P	1	Homo sapiens ribosomal protein S3A (RPS3A), mRNA.
201258_at	ribosomal protein S16	RPS16	2702	P	1331	P	2	8330	P	1766	P	5	3265	P	2149	P	2	Homo sapiens ribosomal protein S16 (RPS16), mRNA.
201260_s_at	synaptophysin-like protein	SYPL	364	P	83	A	4	166	P	54	A	3	112	P	35	A	3	Homo sapiens synaptophysin-like protein (SYPL), mRNA.
201262_s_at	biglycan	BGN	3	A	6	A	0	30	A	17	A	2	6	A	42	A	0	Homo sapiens biglycan (BGN), mRNA.
201263_at	threonyl-tRNA synthetase	TARS	428	P	76	A	6	597	P	180	A	3	216	P	40	A	5	Homo sapiens threonyl-tRNA synthetase (TARS), mRNA.
201264_at	coatomer protein complex, subunit epsilon	COPE	275	P	69	A	4	268	M	56	A	5	175	P	177	A	1	Homo sapiens coatomer protein complex, subunit epsilon (COPE), mRNA.
201266_at	thioredoxin reductase 1	TXNRD1	201	P	159	P	1	301	A	158	P	2	354	P	223	P	2	Homo sapiens thioredoxin reductase 1 (TXNRD1), mRNA.
201267_s_at	proteasome (prosome, macropain) 26S subunit, ATPase, 3	PSMC3	112	A	20	A	6	132	P	68	A	2	25	A	52	A	0	EST
201268_at	non-metastatic cells 2, protein (NM23B) expressed in	NME2	2327	P	206	P	11	1583	P	252	A	6	390	P	272	P	1	Homo sapiens non-metastatic cells 2, protein (NM23B) expressed in (NME2), nuclear gene encoding mitochondrial protein, mRNA.
201271_s_at	RNA binding protein (autoantigenic, hnRNP-associated with lethal yellow)	RALY	215	P	177	P	1	205	P	102	A	2	142	P	119	P	1	Homo sapiens RNA-binding protein (autoantigenic) (RALY), transcript variant 1, mRNA.
201272_at	aldo-keto reductase family 1, member B1 (aldose reductase)	AKR1B1	56	A	361	P	0	195	P	252	P	1	272	P	285	A	1	Homo sapiens aldo-keto reductase family 1, member B1 (aldose reductase) (AKR1B1), mRNA.
201273_s_at	signal recognition particle 9kDa	SRP9	567	P	134	P	4	790	P	205	P	4	418	P	214	P	2	Homo sapiens signal recognition particle 9kD (SRP9), mRNA.
201274_at	proteasome (prosome, macropain) subunit, alpha type, 5	PSMA5	692	P	270	P	3	579	P	206	M	3	360	P	171	A	2	Homo sapiens proteasome (prosome, macropain) subunit, alpha type, 5 (PSMA5), mRNA.
201275_at	farnesyl diphosphate synthase (farnesyl pyrophosphate synthetase, dimethylallyltranstransferase, geranyltranstransferase)	FDPS	452	P	238	P	2	607	P	209	A	3	329	P	216	A	2	Homo sapiens farnesyl diphosphate synthase (farnesyl pyrophosphate synthetase, dimethylallyltranstransferase, geranyltranstransferase) (FDPS), mRNA.
201276_at	RAB5B, member RAS oncogene family	RAB5B	161	P	112	P	1	99	P	98	P	1	102	P	250	P	0	Homo sapiens DC43 mRNA, complete cds.
201277_s_at	heterogeneous nuclear ribonucleoprotein A/B	HNRPAB	816	P	118	A	7	942	P	197	P	5	660	P	109	P	6	Homo sapiens heterogeneous nuclear ribonucleoprotein AB (HNRPAB), mRNA.
201278_at	Homo sapiens cDNA FLJ35517 fis, clone SPLEN2000698.		42	A	194	P	0	11	A	84	A	0	100	P	32	A	3	EST
201281_at	adhesion regulating molecule 1	ADRM1	77	P	147	A	1	140	P	191	A	1	127	P	200	A	1	Homo sapiens cell membrane glycoprotein, 110000M(r) (surface antigen) (GP110), mRNA.
201282_at	oxoglutarate (alpha-ketoglutarate) dehydrogenase (lipoamide)	OGDH	18	A	38	A	0	6	A	94	A	0	47	A	30	A	2	Homo sapiens oxoglutarate dehydrogenase (lipoamide) (OGDH), mRNA.
201284_s_at	N-acylaminoacyl-peptide hydrolase	APEH	125	P	24	A	5	224	P	84	A	3	194	P	105	A	2	Homo sapiens N-acylaminoacyl-peptide hydrolase (APEH), mRNA.
201285_at	makorin, ring finger protein, 1	MKRN1	520	P	1410	P	0	585	P	5645	P	0	977	P	3796	P	0	Homo sapiens makorin, ring finger protein, 1 (MKRN1), mRNA.
201286_at	syndecan 1	SDC1	563	P	18	A	31	101	P	60	A	2	48	A	54	A	1	H.sapiens syndecan-1 gene (exons 2-5)
201288_at	Rho GDP dissociation inhibitor (GDI) beta	ARHGDIB	1227	P	4210	P	0	1037	P	3087	P	0	1506	P	2143	P	1	Homo sapiens Rho GDP dissociation inhibitor (GDI) beta (ARHGDIB), mRNA.
201289_at	cysteine-rich, angiogenic inducer, 61	CYR61	979	P	49	A	20	134	P	11	A	13	46	A	61	A	1	Homo sapiens cysteine-rich, angiogenic inducer, 61 (CYR61), mRNA.
201290_at	signal peptidase complex (18kD)	SPC18	2310	P	1371	P	2	1972	P	975	P	2	2799	P	1163	P	2	Homo sapiens signal peptidase complex (18kD) (SPC18), mRNA.
201292_at	topoisomerase (DNA) II alpha 170kDa	TOP2A	138	P	17	A	8	95	A	38	A	3	50	A	3	A	16	EST
201293_x_at	peptidylprolyl isomerase A (cyclophilin A)	PPIA	5890	P	3549	P	2	12035	P	4558	P	3	6298	P	4226	P	1	Homo sapiens peptidylprolyl isomerase A (cyclophilin A) (PPIA), mRNA.
201300_s_at	prion protein (p27-30) (Creutzfeld-Jakob disease, Gerstmann-Strausler-Scheinker syndrome, fatal familial insomnia)	PRNP	45	P	265	P	0	93	P	150	P	1	262	P	135	P	2	Homo sapiens prion protein (p27-30) (Creutzfeld-Jakob disease, Gerstmann-Strausler-Scheinker syndrome, fatal familial insomnia) (PRNP), mRNA.
201302_at	annexin A4	ANXA4	348	P	150	P	2	76	P	70	P	1	215	P	146	P	1	Homo sapiens annexin A4 (ANXA4), mRNA.
201304_at	NADH dehydrogenase (ubiquinone) 1 alpha subcomplex, 5, 13kDa	NDUFA5	278	P	98	P	3	162	P	123	P	1	149	P	65	P	2	Homo sapiens NADH dehydrogenase (ubiquinone) 1 alpha subcomplex, 5 (13kD, B13) (NDUFA5), nuclear gene encoding mitochondrial protein, mRNA.
201312_s_at	SH3 domain binding glutamic acid-rich protein like	SH3BGRL	987	P	1322	P	1	257	P	766	P	0	906	P	693	P	1	Homo sapiens SH3 domain binding glutamic acid-rich protein like (SH3BGRL), mRNA.
201313_at	enolase 2, (gamma, neuronal)	ENO2	73	M	50	A	1	45	A	10	A	5	65	P	19	A	3	Homo sapiens enolase 2, (gamma, neuronal) (ENO2), mRNA.
201314_at	serine/threonine kinase 25 (STE20 homolog, yeast)	STK25	72	P	49	A	1	48	P	22	A	2	91	P	20	A	5	Homo sapiens serinethreonine kinase 25 (Ste20, yeast homolog) (STK25), mRNA.
201315_x_at	interferon induced transmembrane protein 2 (1-8D)	IFITM2	3055	P	9336	P	0	2068	P	7078	P	0	6624	P	9466	P	1	Homo sapiens interferon induced transmembrane protein 2 (1-8D) (IFITM2), mRNA.
201317_s_at	proteasome (prosome, macropain) subunit, alpha type, 2	PSMA2	452	P	353	P	1	750	P	283	P	3	301	P	272	P	1	Homo sapiens proteasome (prosome, macropain) subunit, alpha type, 2 (PSMA2), mRNA.
201318_s_at	myosin, light polypeptide, regulatory, non-sarcomeric (20kD)	MLCB	820	P	2739	P	0	3026	P	2498	P	1	1852	P	2212	P	1	Homo sapiens myosin, light polypeptide, regulatory, non-sarcomeric (20kD) (MLCB), mRNA.
201321_s_at	SWI/SNF related, matrix associated, actin dependent regulator of chromatin, subfamily c, member 2	SMARCC2	77	P	107	A	1	63	P	40	P	2	46	P	48	A	1	Homo sapiens SWISNF related, matrix associated, actin dependent regulator of chromatin, subfamily c, member 2 (SMARCC2), mRNA.
201322_at	ATP synthase, H+ transporting, mitochondrial F1 complex, beta polypeptide	ATP5B	844	P	558	P	2	2423	P	1799	P	1	1495	P	1156	P	1	Homo sapiens ATP synthase, H+ transporting, mitochondrial F1 complex, beta polypeptide (ATP5B), nuclear gene encoding mitochondrial protein, mRNA.
201323_at	EBNA1 binding protein 2	EBNA1BP2	221	P	114	P	2	342	P	145	P	2	197	P	133	P	1	Homo sapiens nucleolar protein p40; homolog of yeast EBNA1-binding protein (P40), mRNA.
201324_at	epithelial membrane protein 1	EMP1	270	P	3	A	100	32	P	25	A	1	53	P	29	A	2	Homo sapiens epithelial membrane protein 1 (EMP1), mRNA.
201327_s_at	chaperonin containing TCP1, subunit 6A (zeta 1)	CCT6A	319	P	130	P	2	346	P	67	P	5	155	P	138	M	1	Homo sapiens chaperonin containing TCP1, subunit 6A (zeta 1) (CCT6A), mRNA.
201329_s_at	v-ets erythroblastosis virus E26 oncogene homolog 2 (avian)	ETS2	40	A	88	A	0	52	A	85	A	1	257	P	115	M	2	Homo sapiens v-ets avian erythroblastosis virus E26 oncogene homolog 2 (ETS2), mRNA.
201330_at	arginyl-tRNA synthetase	RARS	111	P	43	A	3	139	A	15	A	9	86	A	12	A	7	Homo sapiens arginyl-tRNA synthetase (RARS), mRNA.
201331_s_at	signal transducer and activator of transcription 6, interleukin-4 induced	STAT6	497	P	1229	P	0	382	P	660	P	1	3296	P	966	P	3	Homo sapiens, signal transducer and activator of transcription 6, interleukin-4 induced, clone MGC:3649, mRNA, complete cds.
201336_at	vesicle-associated membrane protein 3 (cellubrevin)	VAMP3	398	P	1003	P	0	518	P	673	P	1	1478	P	628	P	2	Homo sapiens, Similar to vesicle-associated membrane protein 3, clone MGC:2110, mRNA, complete cds.
201339_s_at	sterol carrier protein 2	SCP2	227	P	130	P	2	543	P	201	P	3	182	P	208	P	1	Homo sapiens sterol carrier protein 2 (SCP2), mRNA.
201341_at	ectodermal-neural cortex (with BTB-like domain)	ENC1	132	A	135	A	1	139	A	218	A	1	110	A	90	A	1	Homo sapiens ectodermal-neural cortex (with BTB-like domain) (ENC1), mRNA.
201342_at	small nuclear ribonucleoprotein polypeptide C	SNRPC	143	A	118	A	1	166	A	66	A	2	134	A	31	A	4	Homo sapiens small nuclear ribonucleoprotein polypeptide C (SNRPC), mRNA.
201343_at	ubiquitin-conjugating enzyme E2D 2 (UBC4/5 homolog, yeast)	UBE2D2	324	P	397	P	1	335	P	232	P	1	349	P	313	P	1	EST
201348_at	glutathione peroxidase 3 (plasma)	GPX3	21	A	118	A	0	53	A	160	P	0	44	M	159	P	0	Homo sapiens glutathione peroxidase 3 (plasma) (GPX3), mRNA.
201349_at	solute carrier family 9 (sodium/hydrogen exchanger), isoform 3 regulatory factor 1	SLC9A3R1	470	P	263	A	2	99	A	185	A	1	223	P	209	A	1	Homo sapiens solute carrier family 9 (sodiumhydrogen exchanger), isoform 3 regulatory factor 1 (SLC9A3R1), mRNA.
201350_at	flotillin 2	FLOT2	210	P	675	P	0	438	P	807	P	1	278	P	865	P	0	Homo sapiens flotillin 2 (FLOT2), mRNA.
201351_s_at	YME1-like 1 (S. cerevisiae)	YME1L1	333	P	241	P	1	324	P	168	P	2	325	P	225	P	1	Homo sapiens FtsH homolog mRNA, complete cds.
201353_s_at	bromodomain adjacent to zinc finger domain, 2A	BAZ2A	122	A	149	A	1	52	A	49	A	1	69	A	46	A	1	EST
201356_at	splicing factor 3a, subunit 1, 120kDa	SF3A1	306	P	445	P	1	382	P	389	P	1	933	P	639	P	1	EST
201358_s_at	coatomer protein complex, subunit beta	COPB	1784	P	1063	P	2	1519	P	524	P	3	1048	P	592	P	2	Homo sapiens coatomer protein complex, subunit beta (COPB), mRNA.
201360_at	cystatin C (amyloid angiopathy and cerebral hemorrhage)	CST3	302	P	321	P	1	135	P	245	P	1	1902	P	315	P	6	Homo sapiens cystatin C (amyloid angiopathy and cerebral hemorrhage) (CST3), mRNA.
201362_at	NS1-binding protein	NS1-BP	104	P	200	P	1	79	P	177	P	0	104	P	123	P	1	Homo sapiens NS1-binding protein-like protein mRNA, complete cds.
201364_s_at	ornithine decarboxylase antizyme 2	OAZ2	82	P	307	P	0	265	P	585	P	0	288	P	542	P	1	Homo sapiens ornithine decarboxylase antizyme mRNA, complete cds.
201368_at	zinc finger protein 36, C3H type-like 2	ZFP36L2	524	P	572	P	1	396	P	704	P	1	1529	P	1046	P	1	Human Tis11d gene, complete cds
201371_s_at	cullin 3	CUL3	331	P	433	P	1	448	P	442	P	1	789	P	504	P	2	Homo sapiens cullin 3 mRNA, complete cds.
201373_at	plectin 1, intermediate filament binding protein 500kDa	PLEC1	50	A	97	A	1	71	A	281	A	0	97	A	208	A	0	Homo sapiens plectin 1, intermediate filament binding protein, 500kD (PLEC1), mRNA.
201375_s_at	protein phosphatase 2 (formerly 2A), catalytic subunit, beta isoform	PPP2CB	122	P	123	A	1	321	P	70	A	5	220	P	149	A	1	Homo sapiens protein phosphatase 2 (formerly 2A), catalytic subunit, beta isoform (PPP2CB), mRNA.
201376_s_at	heterogeneous nuclear ribonucleoprotein F	HNRPF	128	P	39	A	3	93	P	43	A	2	52	A	20	A	3	EST
201379_s_at	tumor protein D52-like 2	TPD52L2	161	P	194	P	1	188	P	107	A	2	351	P	231	P	2	Homo sapiens tumor protein D52-like 2 (TPD52L2), mRNA.
201380_at	cartilage associated protein	CRTAP	104	P	183	P	1	92	P	93	A	1	115	P	167	P	1	Homo sapiens cartilage associated protein (CRTAP), mRNA.
201384_s_at	membrane component, chromosome 17, surface marker 2 (ovarian carcinoma antigen CA125)	M17S2	679	P	615	P	1	290	P	180	P	2	588	P	192	M	3	Homo sapiens membrane component, chromosome 17, surface marker 2 (ovarian carcinoma antigen CA125) (M17S2), mRNA.
201386_s_at	DEAD/H (Asp-Glu-Ala-Asp/His) box polypeptide 15	DDX15	90	P	63	M	1	331	P	161	P	2	88	P	149	P	1	Homo sapiens dead box protein 15 mRNA, complete cds.
201387_s_at	ubiquitin carboxyl-terminal esterase L1 (ubiquitin thiolesterase)	UCHL1	24	A	42	A	1	5	A	53	A	0	30	A	56	A	1	Homo sapiens ubiquitin carboxyl-terminal esterase L1 (ubiquitin thiolesterase) (UCHL1), mRNA.
201388_at	proteasome (prosome, macropain) 26S subunit, non-ATPase, 3	PSMD3	122	P	42	A	3	88	P	10	A	9	26	A	19	A	1	Homo sapiens proteasome (prosome, macropain) 26S subunit, non-ATPase, 3 (PSMD3), mRNA.
201389_at	integrin, alpha 5 (fibronectin receptor, alpha polypeptide)	ITGA5	12	A	180	A	0	40	A	143	A	0	152	P	34	A	4	Homo sapiens integrin, alpha 5 (fibronectin receptor, alpha polypeptide) (ITGA5), mRNA.
201390_s_at	casein kinase 2, beta polypeptide	CSNK2B	1291	P	390	P	3	1111	P	676	P	2	679	P	476	P	1	Homo sapiens casein kinase 2, beta polypeptide (CSNK2B), mRNA.
201391_at	heat shock protein 75	TRAP1	390	P	366	A	1	412	P	297	A	1	203	A	329	A	1	Homo sapiens heat shock protein 75 (TRAP1), mRNA.
201393_s_at	insulin-like growth factor 2 receptor	IGF2R	53	P	386	P	0	42	A	296	P	0	125	P	439	P	0	Homo sapiens insulin-like growth factor 2 receptor (IGF2R), mRNA.
201394_s_at	RNA binding motif protein 5	RBM5	81	A	133	A	1	116	A	134	A	1	141	P	182	A	1	Human putative tumor suppressor (LUCA15) mRNA, complete cds.
201396_s_at	small glutamine-rich tetratricopeptide repeat (TPR)-containing	SGT	52	A	10	A	5	68	A	23	A	3	49	P	52	A	1	Homo sapiens small glutamine-rich tetratricopeptide repeat (TPR)-containing (SGT), mRNA.
201397_at	phosphoglycerate dehydrogenase	PHGDH	239	P	61	A	4	193	P	151	A	1	74	P	78	A	1	Homo sapiens phosphoglycerate dehydrogenase (PHGDH), mRNA.
201398_s_at	translocating chain-associating membrane protein	TRAM	1056	P	688	P	2	792	P	584	P	1	570	P	565	P	1	Homo sapiens, translocating chain-associating membrane protein, clone MGC:784, mRNA, complete cds.
201400_at	proteasome (prosome, macropain) subunit, beta type, 3	PSMB3	490	P	388	P	1	587	P	479	P	1	296	P	412	P	1	Homo sapiens proteasome (prosome, macropain) subunit, beta type, 3 (PSMB3), mRNA.
201403_s_at	microsomal glutathione S-transferase 3	MGST3	991	P	93	A	11	447	P	271	A	2	268	M	204	A	1	Homo sapiens microsomal glutathione S-transferase 3 (MGST3), mRNA.
201405_s_at	COP9 subunit 6 (MOV34 homolog, 34 kD)	COPS6	487	P	160	P	3	703	P	400	P	2	341	P	327	P	1	Homo sapiens COP9 subunit 6 (MOV34 homolog, 34 kD) (MOV34-34KD), mRNA.
201406_at	ribosomal protein L36A	RPL36A	2986	P	474	P	6	3739	P	960	P	4	2241	P	1439	P	2	Homo sapiens ribosomal protein L44 (RPL44), mRNA.
201407_s_at	protein phosphatase 1, catalytic subunit, beta isoform	PPP1CB	85	P	88	P	1	77	P	78	P	1	38	P	53	P	1	EST
201413_at	hydroxysteroid (17-beta) dehydrogenase 4	HSD17B4	532	P	190	P	3	1622	P	164	P	10	327	P	202	P	2	Homo sapiens hydroxysteroid (17-beta) dehydrogenase 4 (HSD17B4), mRNA.
201414_s_at	nucleosome assembly protein 1-like 4	NAP1L4	255	P	258	A	1	165	A	357	A	0	149	P	196	A	1	Homo sapiens nucleosome assembly protein 1-like 4 (NAP1L4), mRNA.
201415_at	glutathione synthetase	GSS	248	P	58	A	4	284	P	69	A	4	289	P	64	A	5	Homo sapiens glutathione synthetase (GSS), mRNA.
201417_at	Homo sapiens mRNA full length insert cDNA clone EUROIMAGE 1977059		182	P	6	A	32	71	P	2	A	30	57	P	20	A	3	Human DNA sequence from clone RP3-322L4 on chromosome 6. Contains the SOX4 gene for SRY (sex determining region Y)-box 4, a pseudogene similar to predicted fly, worm and yeast genes, ESTs, STSs, GSSs and four CpG islands
201419_at	BRCA1 associated protein-1 (ubiquitin carboxy-terminal hydrolase)	BAP1	132	A	166	A	1	122	A	213	A	1	136	A	82	A	2	Homo sapiens BRCA1 associated protein-1 (ubiquitin carboxy-terminal hydrolase) (BAP1), mRNA.
201422_at	interferon, gamma-inducible protein 30	IFI30	1102	P	3886	P	0	1263	P	1679	P	1	7204	P	5861	P	1	Homo sapiens interferon, gamma-inducible protein 30 (IFI30), mRNA.
201424_s_at	cullin 4A	CUL4A	95	P	69	P	1	28	P	52	A	1	42	P	54	P	1	Homo sapiens cullin 4A (CUL4A), mRNA.
201425_at	aldehyde dehydrogenase 2 family (mitochondrial)	ALDH2	166	M	385	P	0	254	P	177	P	1	781	P	348	P	2	Homo sapiens aldehyde dehydrogenase 2, mitochondrial (ALDH2), mRNA.
201426_s_at	ribosomal protein, large P2	RPLP2	180	P	978	P	0	983	P	2278	P	0	3065	P	3375	P	1	EST
201427_s_at	selenoprotein P, plasma, 1	SEPP1	769	P	8	A	94	109	P	36	A	3	50	P	7	A	8	Homo sapiens selenoprotein P, plasma, 1 (SEPP1), mRNA.
201428_at	claudin 4	CLDN4	368	P	4	A	88	236	P	13	A	18	43	A	6	A	7	Homo sapiens claudin 4 (CLDN4), mRNA.
201429_s_at	ribosomal protein L37a	RPL37A	11256	P	12080	P	1	19662	P	22232	P	1	12202	P	23224	P	1	Homo sapiens ribosomal protein L37a (RPL37A), mRNA.
201431_s_at	dihydropyrimidinase-like 3	DPYSL3	3	A	42	A	0	28	A	11	A	3	30	A	55	A	1	Homo sapiens dihydropyrimidinase-like 3 (DPYSL3), mRNA.
201432_at	catalase	CAT	710	P	1347	P	1	1886	P	7126	P	0	2275	P	6340	P	0	Homo sapiens catalase (CAT), mRNA.
201433_s_at	phosphatidylserine synthase 1	PTDSS1	548	P	530	P	1	512	P	598	P	1	721	P	869	P	1	Homo sapiens phosphatidylserine synthase 1 (PTDSS1), mRNA.
201434_at	tetratricopeptide repeat domain 1	TTC1	103	A	28	A	4	106	A	175	A	1	131	A	42	A	3	Homo sapiens tetratricopeptide repeat domain 1 (TTC1), mRNA.
201436_at	eukaryotic translation initiation factor 4E	EIF4E	39	P	22	P	2	37	P	42	P	1	34	P	15	A	2	EST
201438_at	collagen, type VI, alpha 3	COL6A3	4	A	12	A	0	5	A	6	A	1	48	A	12	A	4	Homo sapiens collagen, type VI, alpha 3 (COL6A3), mRNA.
201439_at	golgi-specific brefeldin A resistance factor 1	GBF1	13	A	14	A	1	43	A	31	A	1	27	A	120	A	0	Homo sapiens golgi-specific brefeldin A resistance factor 1 (GBF1), mRNA.
201441_at	cytochrome c oxidase subunit VIb	COX6B	1315	P	1334	P	1	2903	P	3308	P	1	1302	P	2343	P	1	Homo sapiens cytochrome c oxidase subunit VIb (COX6B), nuclear gene encoding mitochondrial protein, mRNA.
201443_s_at	ATPase, H+ transporting, lysosomal interacting protein 2	ATP6IP2	487	P	272	P	2	130	P	208	P	1	506	P	214	P	2	Homo sapiens HT028 mRNA, complete cds.
201445_at	calponin 3, acidic	CNN3	43	A	13	A	3	40	A	10	A	4	8	A	8	A	1	Homo sapiens calponin 3, acidic (CNN3), mRNA.
201448_at	Homo sapiens cDNA FLJ36425 fis, clone THYMU2011482.		98	P	82	P	1	62	P	9	A	7	72	P	52	A	1	EST
201455_s_at	aminopeptidase puromycin sensitive	NPEPPS	71	A	11	A	6	61	A	87	A	1	71	A	103	A	1	Homo sapiens mRNA for puromycin sensitive aminopeptidase, partial.
201458_s_at	BUB3 budding uninhibited by benzimidazoles 3 homolog (yeast)	BUB3	94	P	110	A	1	144	P	96	A	2	86	P	82	A	1	Homo sapiens BUB3 (budding uninhibited by benzimidazoles 3, yeast) homolog (BUB3), mRNA.
201459_at	RuvB-like 2 (E. coli)	RUVBL2	142	P	11	A	13	190	P	15	A	13	144	P	17	A	8	Homo sapiens RuvB (E coli homolog)-like 2 (RUVBL2), mRNA.
201460_at	mitogen-activated protein kinase-activated protein kinase 2	MAPKAPK2	167	P	336	P	0	243	P	320	P	1	142	P	400	P	0	EST
201463_s_at	transaldolase 1	TALDO1	691	P	1327	P	1	1613	P	3576	P	0	1879	P	3112	P	1	Homo sapiens transaldolase 1 (TALDO1), mRNA.
201468_s_at	NAD(P)H dehydrogenase, quinone 1	NQO1	1034	P	34	A	30	191	P	64	A	3	126	P	158	M	1	Homo sapiens diaphorase (NADHNADPH) (cytochrome b-5 reductase) (DIA4), mRNA.
201470_at	glutathione-S-transferase like; glutathione transferase omega	GSTTLp28	1446	P	2455	P	1	1984	P	1159	P	2	2211	P	1295	P	2	Homo sapiens glutathione-S-transferase like; glutathione transferase omega (GSTTLp28), mRNA.
201471_s_at	sequestosome 1	SQSTM1	300	P	265	P	1	1106	P	364	M	3	399	P	211	A	2	Homo sapiens sequestosome 1 (SQSTM1), mRNA.
201472_at	von Hippel-Lindau binding protein 1	VBP1	272	P	202	P	1	549	P	354	P	2	284	P	283	P	1	Homo sapiens von Hippel-Lindau binding protein 1 (VBP1), mRNA.
201473_at	jun B proto-oncogene	JUNB	158	P	167	M	1	81	A	87	A	1	108	P	62	A	2	Homo sapiens jun B proto-oncogene (JUNB), mRNA.
201474_s_at	integrin, alpha 3 (antigen CD49C, alpha 3 subunit of VLA-3 receptor)	ITGA3	128	A	17	A	7	15	A	42	A	0	44	A	28	A	2	Homo sapiens integrin, alpha 3 (antigen CD49C, alpha 3 subunit of VLA-3 receptor) (ITGA3), transcript variant a, mRNA.
201477_s_at	ribonucleotide reductase M1 polypeptide	RRM1	522	P	140	P	4	214	P	98	P	2	204	P	102	P	2	Homo sapiens ribonucleotide reductase M1 polypeptide (RRM1), mRNA.
201479_at	dyskeratosis congenita 1, dyskerin	DKC1	1586	P	269	P	6	1032	P	270	A	4	519	P	188	A	3	Homo sapiens dyskeratosis congenita 1, dyskerin (DKC1), mRNA.
201480_s_at	suppressor of Ty 5 homolog (S. cerevisiae)	SUPT5H	185	P	201	P	1	120	P	214	A	1	144	P	186	A	1	Homo sapiens suppressor of Ty (S.cerevisiae) 5 homolog (SUPT5H), mRNA.
201481_s_at	phosphorylase, glycogen; brain	PYGB	8	A	24	A	0	10	A	34	A	0	8	A	33	A	0	Homo sapiens phosphorylase, glycogen; brain (PYGB), nuclear gene encoding mitochondrial protein, mRNA.
201482_at	quiescin Q6	QSCN6	344	P	180	A	2	68	A	185	A	0	273	P	193	A	1	Homo sapiens quiescin Q6 (QSCN6), mRNA.
201484_at	suppressor of Ty 4 homolog 1 (S. cerevisiae)	SUPT4H1	268	P	367	P	1	266	P	434	P	1	332	P	452	P	1	Homo sapiens suppressor of Ty (S.cerevisiae) 4 homolog 1 (SUPT4H1), mRNA.
201486_at	reticulocalbin 2, EF-hand calcium binding domain	RCN2	78	P	42	A	2	37	A	57	A	1	25	A	23	A	1	Homo sapiens reticulocalbin 2, EF-hand calcium binding domain (RCN2), mRNA.
201487_at	cathepsin C	CTSC	473	P	546	P	1	150	P	303	P	0	575	P	335	P	2	Homo sapiens cathepsin C (CTSC), mRNA.
201489_at	peptidylprolyl isomerase F (cyclophilin F)	PPIF	264	P	262	P	1	178	P	199	M	1	276	P	185	P	1	Homo sapiens, peptidylprolyl isomerase F (cyclophilin F), clone MGC:11022, mRNA, complete cds.
201491_at	chromosome 14 open reading frame 3	C14orf3	817	P	438	P	2	536	P	328	P	2	425	P	399	P	1	Homo sapiens chromosome 14 open reading frame 3 (C14ORF3), mRNA.
201492_s_at	ribosomal protein L41	RPL41	11307	P	10255	P	1	19240	P	28608	P	1	11721	P	21584	P	1	Homo sapiens ribosomal protein L41 (RPL41), mRNA.
201494_at	prolylcarboxypeptidase (angiotensinase C)	PRCP	1283	P	414	P	3	375	P	862	P	0	670	P	1236	P	1	Homo sapiens prolylcarboxypeptidase (angiotensinase C) (PRCP), mRNA.
201496_x_at	myosin, heavy polypeptide 11, smooth muscle	MYH11	1	A	10	A	0	2	A	12	A	0	1	A	8	A	0	smooth muscle myosin heavy chain isoform SM2 human, umbilical cord, fetal aorta, mRNA Partial, 1078 nt.
201498_at	ubiquitin specific protease 7 (herpes virus-associated)	USP7	653	P	542	P	1	521	P	299	P	2	687	P	427	P	2	EST
201500_s_at	protein phosphatase 1, regulatory (inhibitor) subunit 11	PPP1R11	352	P	602	P	1	348	P	426	P	1	709	P	510	P	1	Homo sapiens protein phosphatase 1, regulatory (inhibitor) subunit 11 (PPP1R11), mRNA.
201502_s_at	nuclear factor of kappa light polypeptide gene enhancer in B-cells inhibitor, alpha	NFKBIA	1794	P	1789	P	1	2209	P	716	P	3	2789	P	1265	P	2	EST
201503_at	Ras-GTPase-activating protein SH3-domain-binding protein	G3BP	238	P	121	P	2	175	P	79	P	2	97	P	96	P	1	EST
201505_at	laminin, beta 1	LAMB1	15	A	1	A	14	2	A	1	A	3	8	A	3	A	3	Homo sapiens laminin, beta 1 (LAMB1), mRNA.
201506_at	transforming growth factor, beta-induced, 68kDa	TGFBI	123	A	184	P	1	39	A	266	M	0	2687	P	389	P	7	Homo sapiens transforming growth factor, beta-induced, 68kD (TGFBI), mRNA.
201507_at	prefoldin 1	PFDN1	58	A	48	A	1	63	P	135	A	0	114	P	54	A	2	Homo sapiens prefoldin 1 (PFDN1), mRNA.
201508_at	insulin-like growth factor binding protein 4	IGFBP4	40	A	11	A	3	25	A	26	A	1	20	A	19	A	1	Homo sapiens insulin-like growth factor-binding protein 4 (IGFBP4), mRNA.
201511_at	angio-associated, migratory cell protein	AAMP	159	P	181	A	1	174	P	246	A	1	104	A	224	A	0	Homo sapiens angio-associated, migratory cell protein (AAMP), mRNA.
201513_at	translin	TSN	115	P	54	A	2	60	P	88	P	1	76	P	37	A	2	EST
201516_at	spermidine synthase	SRM	123	P	87	A	1	248	P	43	A	6	57	A	84	A	1	Homo sapiens spermidine synthase (SRM), mRNA.
201517_at	nuclear cap binding protein subunit 2, 20kDa	NCBP2	439	P	163	P	3	341	P	104	P	3	120	P	196	P	1	Homo sapiens, nuclear cap binding protein subunit 2, 20kD, clone MGC:4991, mRNA, complete cds.
201518_at	chromobox homolog 1 (HP1 beta homolog Drosophila )	CBX1	523	P	221	P	2	335	P	196	P	2	337	P	228	P	1	Homo sapiens chromobox homolog 1 (Drosophila HP1 beta) (CBX1), mRNA.
201520_s_at	G-rich RNA sequence binding factor 1	GRSF1	121	P	113	A	1	284	P	138	P	2	312	P	112	A	3	EST
201522_x_at	small nuclear ribonucleoprotein polypeptide N	SNRPN	358	P	389	P	1	1630	P	661	P	2	353	P	530	P	1	Homo sapiens small nuclear ribonucleoprotein polypeptide N (SNRPN), transcript variant 1, mRNA.
201525_at	apolipoprotein D	APOD	208	P	122	A	2	124	A	78	A	2	10	A	20	A	1	Homo sapiens apolipoprotein D (APOD), mRNA.
201526_at	ADP-ribosylation factor 5	ARF5	226	P	189	M	1	285	P	508	A	1	260	A	514	A	1	Homo sapiens ADP-ribosylation factor 5 (ARF5), mRNA.
201527_at	ATPase, H+ transporting, lysosomal 14kDa, V1 subunit F	ATP6V1F	319	P	290	A	1	451	P	633	A	1	238	P	477	A	0	Homo sapiens ATPase, vacuolar, 14 kD (ATP6S14), mRNA.
201528_at	replication protein A1, 70kDa	RPA1	202	P	334	P	1	374	P	466	P	1	245	P	294	P	1	EST
201530_x_at	eukaryotic translation initiation factor 4A, isoform 1	EIF4A1	1734	P	1482	P	1	5116	P	1425	P	4	2272	P	1806	P	1	Homo sapiens eukaryotic translation initiation factor 4A, isoform 1 (EIF4A1), mRNA.
201531_at	zinc finger protein 36, C3H type, homolog (mouse)	ZFP36	740	P	730	P	1	354	P	568	A	1	671	P	523	A	1	Homo sapiens zinc finger protein homologous to Zfp-36 in mouse (ZFP36), mRNA.
201532_at	proteasome (prosome, macropain) subunit, alpha type, 3	PSMA3	248	P	43	A	6	502	P	54	A	9	305	P	138	A	2	Homo sapiens proteasome (prosome, macropain) subunit, alpha type, 3 (PSMA3), mRNA.
201533_at	catenin (cadherin-associated protein), beta 1, 88kDa	CTNNB1	175	P	118	P	1	112	P	133	M	1	67	M	132	P	1	Homo sapiens catenin (cadherin-associated protein), beta 1 (88kD) (CTNNB1), mRNA.
201534_s_at	ubiquitin-like 3	UBL3	16	P	19	P	1	17	P	25	P	1	65	P	11	A	6	Homo sapiens HCG-1 protein (HCG-1) mRNA, complete cds.
201536_at	dual specificity phosphatase 3 (vaccinia virus phosphatase VH1-related)	DUSP3	199	P	113	M	2	226	P	149	P	2	201	P	126	A	2	EST
201540_at	four and a half LIM domains 1	FHL1	41	A	155	P	0	165	P	313	P	1	274	P	266	P	1	Homo sapiens four and a half LIM domains 1 (FHL1), mRNA.
201541_s_at	putative cyclin G1 interacting protein	CG1I	264	P	171	A	2	354	P	229	A	2	133	A	73	A	2	Homo sapiens putative cyclin G1 interacting protein (CG1I), mRNA.
201546_at	thyroid hormone receptor interactor 12	TRIP12	316	P	481	P	1	369	P	898	P	0	542	P	433	P	1	Homo sapiens thyroid hormone receptor interactor 12 (TRIP12), mRNA.
201548_s_at	putative DNA/chromatin binding motif	PLU-1	233	P	100	P	2	121	P	101	A	1	62	A	84	A	1	EST
201553_s_at	lysosomal-associated membrane protein 1	LAMP1	5078	P	4582	P	1	1950	P	3092	P	1	5142	P	4196	P	1	Homo sapiens lysosomal-associated membrane protein 1 (LAMP1), mRNA.
201555_at	MCM3 minichromosome maintenance deficient 3 (S. cerevisiae)	MCM3	204	P	229	A	1	151	P	194	A	1	103	P	174	A	1	Homo sapiens minichromosome maintenance deficient (S. cerevisiae) 3 (MCM3), mRNA.
201556_s_at	vesicle-associated membrane protein 2 (synaptobrevin 2)	VAMP2	43	P	95	P	0	36	A	54	A	1	90	P	78	A	1	Homo sapiens, vesicle-associated membrane protein 2, clone MGC:3377, mRNA, complete cds.
201558_at	RAE1 RNA export 1 homolog (S. pombe)	RAE1	288	P	176	P	2	177	P	189	P	1	334	P	249	P	1	Homo sapiens RAE1 (RNA export 1, S.pombe) homolog (RAE1), mRNA.
201560_at	chloride intracellular channel 4	CLIC4	44	A	77	A	1	69	P	23	A	3	50	P	20	A	2	Homo sapiens chloride intracellular channel 4 (CLIC4), mRNA.
201563_at	sorbitol dehydrogenase	SORD	244	P	114	P	2	1191	P	54	P	22	173	P	92	P	2	Human L-iditol-2 dehydrogenase mRNA, complete cds.
201564_s_at	fascin homolog 1, actin-bundling protein (Strongylocentrotus purpuratus)	FSCN1	4	A	12	A	0	5	A	17	A	0	3	A	16	A	0	Homo sapiens singed (Drosophila)-like (sea urchin fascin homolog like) (SNL), mRNA.
201565_s_at	inhibitor of DNA binding 2, dominant negative helix-loop-helix protein	ID2	359	P	547	P	1	280	P	390	A	1	534	P	394	A	1	Homo sapiens inhibitor of DNA binding 2, dominant negative helix-loop-helix protein (ID2), mRNA.
201567_s_at	golgi autoantigen, golgin subfamily a, 4	GOLGA4	105	A	116	P	1	102	P	109	P	1	38	P	67	P	1	Homo sapiens golgi autoantigen, golgin subfamily a, 4 (GOLGA4), mRNA.
201568_at	low molecular mass ubiquinone-binding protein (9.5kD)	QP-C	1467	P	251	A	6	1073	P	177	A	6	233	P	184	A	1	Homo sapiens low molecular mass ubiquinone-binding protein (9.5kD) (QP-C), mRNA.
201574_at	eukaryotic translation termination factor 1	ETF1	200	M	206	A	1	256	P	215	A	1	189	P	254	A	1	Homo sapiens eukaryotic translation termination factor 1 (ETF1), mRNA.
201575_at	SKI-interacting protein	SNW1	484	P	377	P	1	251	P	327	P	1	417	P	339	P	1	Homo sapiens SKI-INTERACTING PROTEIN (SNW1), mRNA.
201576_s_at	galactosidase, beta 1	GLB1	181	P	335	P	1	264	P	293	A	1	650	P	402	P	2	Homo sapiens galactosidase, beta 1 (GLB1), mRNA.
201577_at	non-metastatic cells 1, protein (NM23A) expressed in	NME1	1735	P	219	P	8	1832	P	424	P	4	111	P	185	P	1	Homo sapiens non-metastatic cells 1, protein (NM23A) expressed in (NME1), mRNA.
201578_at	podocalyxin-like	PODXL	29	A	65	A	0	65	A	62	A	1	92	A	55	A	2	Homo sapiens podocalyxin-like (PODXL), mRNA.
201579_at	FAT tumor suppressor homolog 1 (Drosophila)	FAT	16	A	53	A	0	230	P	42	A	5	114	A	7	A	17	Homo sapiens FAT tumor suppressor (Drosophila) homolog (FAT), mRNA.
201584_s_at	DEAD/H (Asp-Glu-Ala-Asp/His) box polypeptide 39	DDX39	544	P	144	P	4	355	P	200	P	2	292	P	132	P	2	Homo sapiens nuclear RNA helicase, DECD variant of DEAD box family (DDXL), mRNA.
201586_s_at	splicing factor proline/glutamine rich (polypyrimidine tract binding protein associated)	SFPQ	174	P	18	A	10	239	P	20	A	12	201	P	64	P	3	Homo sapiens splicing factor prolineglutamine rich (polypyrimidine tract-binding protein-associated) (SFPQ), mRNA.
201587_s_at	interleukin-1 receptor-associated kinase 1	IRAK1	766	P	395	P	2	1304	P	447	P	3	1441	P	362	P	4	Homo sapiens interleukin-1 receptor-associated kinase 1 (IRAK1), mRNA.
201588_at	thioredoxin-like, 32kDa	TXNL	564	P	461	P	1	854	P	524	P	2	694	P	524	P	1	Homo sapiens thioredoxin-like, 32kD (TXNL), mRNA.
201589_at	SMC1 structural maintenance of chromosomes 1-like 1 (yeast)	SMC1L1	309	P	191	P	2	76	P	52	P	1	240	P	59	P	4	Human mRNA for KIAA0178 gene, partial cds.
201590_x_at	annexin A2	ANXA2	3178	P	983	P	3	520	P	882	P	1	3691	P	1405	P	3	Homo sapiens annexin A2 (ANXA2), mRNA.
201591_s_at	nischarin	NISCH	415	P	588	P	1	364	P	368	P	1	909	P	436	P	2	Homo sapiens imidazoline receptor candidate (I-1), mRNA.
201592_at	eukaryotic translation initiation factor 3, subunit 3 gamma, 40kDa	EIF3S3	908	P	280	P	3	1118	P	512	P	2	1445	P	527	P	3	Homo sapiens eukaryotic translation initiation factor 3, subunit 3 (gamma, 40kD) (EIF3S3), mRNA.
201594_s_at	protein phosphatase 4, regulatory subunit 1	PPP4R1	284	P	748	P	0	301	P	503	P	1	800	P	799	P	1	Homo sapiens protein phosphatase 4, regulatory subunit 1 (PPP4R1), mRNA.
201596_x_at	keratin 18	KRT18	8041	P	127	A	63	7112	P	53	A	135	2742	P	66	A	42	Homo sapiens keratin 18 (KRT18), mRNA.
201597_at	cytochrome c oxidase subunit VIIa polypeptide 2 (liver)	COX7A2	3131	P	1266	P	2	2466	P	1508	P	2	2170	P	908	P	2	Homo sapiens cytochrome c oxidase subunit VIIa polypeptide 2 (liver) (COX7A2), nuclear gene encoding mitochondrial protein, mRNA.
201598_s_at	inositol polyphosphate phosphatase-like 1	INPPL1	178	P	252	P	1	58	A	50	A	1	183	P	173	A	1	Homo sapiens inositol polyphosphate phosphatase-like 1 (INPPL1), mRNA.
201599_at	ornithine aminotransferase (gyrate atrophy)	OAT	1067	P	131	P	8	287	P	195	P	1	192	P	202	P	1	Homo sapiens ornithine aminotransferase (gyrate atrophy) (OAT), nuclear gene encoding mitochondrial protein, mRNA.
201600_at	repressor of estrogen receptor activity	REA	847	P	472	P	2	1961	P	542	P	4	769	P	485	P	2	Homo sapiens B-cell associated protein (REA), mRNA.
201603_at	Homo sapiens full length insert cDNA clone YW25G09		150	P	289	P	1	157	P	234	P	1	245	P	319	P	1	EST
201605_x_at	calponin 2	CNN2	105	A	495	P	0	222	A	441	P	1	255	P	476	A	1	Homo sapiens calponin 2 (CNN2), mRNA.
201606_s_at	nuclear phosphoprotein similar to S. cerevisiae PWP1	PWP1	794	P	247	P	3	786	P	203	P	4	477	P	211	P	2	EST
201611_s_at	isoprenylcysteine carboxyl methyltransferase	ICMT	26	A	61	A	0	96	P	49	A	2	70	P	20	A	4	Homo sapiens isoprenylcysteine carboxyl methyltransferase (ICMT), mRNA.
201612_at	aldehyde dehydrogenase 9 family, member A1	ALDH9A1	1114	P	410	P	3	671	P	355	P	2	600	P	618	P	1	Homo sapiens aldehyde dehydrogenase 9 (gamma-aminobutyraldehyde dehydrogenase, E3 isozyme) (ALDH9), mRNA.
201614_s_at	RuvB-like 1 (E. coli)	RUVBL1	36	A	8	A	4	63	P	11	A	6	31	A	6	A	5	Homo sapiens RuvB (E coli homolog)-like 1 (RUVBL1), mRNA.
201616_s_at	caldesmon 1	CALD1	1	A	2	A	0	49	A	14	A	3	1	A	3	A	1	EST
201619_at	peroxiredoxin 3	PRDX3	296	P	84	A	4	752	P	308	A	2	224	P	206	P	1	Homo sapiens peroxiredoxin 3 (PRDX3), nuclear gene encoding mitochondrial protein, mRNA.
201620_at	membrane-bound transcription factor protease, site 1	MBTPS1	90	A	136	A	1	63	A	128	A	0	99	P	16	A	6	Homo sapiens membrane-bound transcription factor protease, site 1 (MBTPS1), mRNA.
201622_at	EBNA-2 co-activator (100kD)	p100	240	A	226	A	1	335	M	303	A	1	182	A	332	A	1	Homo sapiens EBNA-2 co-activator (100kD) (p100), mRNA.
201624_at	aspartyl-tRNA synthetase	DARS	86	P	50	A	2	21	P	48	A	0	25	P	22	A	1	Homo sapiens aspartyl-tRNA synthetase (DARS), mRNA.
201625_s_at	insulin induced gene 1	INSIG1	27	A	116	A	0	48	A	99	A	0	49	P	56	A	1	EST
201628_s_at	Ras-related GTP-binding protein	RAGA	376	P	215	P	2	152	A	316	P	0	215	P	311	A	1	Homo sapiens Ras-related GTP-binding protein (RAGA), mRNA.
201630_s_at	acid phosphatase 1, soluble	ACP1	349	P	331	P	1	439	P	589	P	1	158	P	282	P	1	Homo sapiens acid phosphatase 1, soluble (ACP1), transcript variant a, mRNA.
201631_s_at	immediate early response 3	IER3	6728	P	512	P	13	107	P	455	P	0	1967	P	1265	P	2	Homo sapiens immediate early response 3 (IER3), mRNA.
201632_at	eukaryotic translation initiation factor 2B, subunit 1 alpha, 26kDa	EIF2B1	146	P	108	A	1	174	P	106	A	2	166	P	95	A	2	Homo sapiens eukaryotic translation initiation factor 2B, subunit 1 (alpha, 26kD) (EIF2B1), mRNA.
201634_s_at	cytochrome b5 outer mitochondrial membrane precursor	CYB5-M	30	A	50	A	1	18	A	50	A	0	19	A	26	A	1	Homo sapiens cytochrome b5 outer mitochondrial membrane precursor (CYB5-M), mRNA.
201636_at	fragile X mental retardation, autosomal homolog 1	FXR1	68	P	55	A	1	54	P	61	P	1	69	P	48	P	1	EST
201641_at	bone marrow stromal cell antigen 2	BST2	2437	P	535	P	5	102	M	162	A	1	135	P	162	A	1	Homo sapiens bone marrow stromal cell antigen 2 (BST2), mRNA.
201642_at	interferon gamma receptor 2 (interferon gamma transducer 1)	IFNGR2	276	P	1168	P	0	623	P	440	P	1	1035	P	1090	P	1	Homo sapiens interferon gamma receptor 2 (interferon gamma transducer 1) (IFNGR2), mRNA.
201645_at	tenascin C (hexabrachion)	TNC	9	A	16	A	1	7	A	16	A	0	19	A	30	A	1	Homo sapiens hexabrachion (tenascin C, cytotactin) (HXB), mRNA.
201647_s_at	scavenger receptor class B, member 2	SCARB2	68	P	81	P	1	68	P	86	P	1	70	P	80	A	1	Homo sapiens CD36 antigen (collagen type I receptor, thrombospondin receptor)-like 2 (lysosomal integral membrane protein II) (CD36L2), mRNA.
201648_at	Human HepG2 partial cDNA, clone hmd3f07m5.		214	P	607	P	0	287	P	649	P	0	609	P	504	P	1	EST
201649_at	ubiquitin-conjugating enzyme E2L 6	UBE2L6	1588	P	2563	P	1	1072	P	895	P	1	694	P	481	P	1	Homo sapiens ubiquitin-conjugating enzyme E2L 6 (UBE2L6), mRNA.
201650_at	keratin 19	KRT19	8045	P	2	A	4023	628	P	2	A	299	118	P	3	A	36	Homo sapiens keratin 19 (KRT19), mRNA.
201651_s_at	protein kinase C and casein kinase substrate in neurons 2	PACSIN2	774	P	1000	P	1	674	P	883	P	1	1174	P	1353	P	1	Homo sapiens protein kinase C and casein kinase substrate in neurons 2 (PACSIN2), mRNA.
201652_at	COP9 constitutive photomorphogenic homolog subunit 5 (Arabidopsis)	COPS5	321	P	170	P	2	286	P	129	P	2	254	P	116	P	2	Homo sapiens COP9 (constitutive photomorphogenic, Arabidopsis, homolog) subunit 5 (COPS5), mRNA.
201653_at	cornichon homolog (Drosophila)	CNIH	233	P	59	P	4	204	P	121	P	2	215	P	132	P	2	Homo sapiens cornichon-like (CNIL), mRNA.
201655_s_at	heparan sulfate proteoglycan 2 (perlecan)	HSPG2	2	A	4	A	1	3	A	8	A	0	3	A	19	A	0	Human heparan sulfate proteoglycan (HSPG2) mRNA, complete cds.
201656_at	integrin, alpha 6	ITGA6	24	A	80	P	0	76	P	49	P	2	38	P	38	A	1	Homo sapiens integrin, alpha 6 (ITGA6), mRNA.
201659_s_at	ADP-ribosylation factor-like 1	ARL1	116	P	14	A	9	202	P	48	A	4	123	P	56	A	2	Homo sapiens ADP-ribosylation factor-like 1 (ARL1), mRNA.
201661_s_at	fatty-acid-Coenzyme A ligase, long-chain 3	FACL3	150	P	82	P	2	48	P	28	A	2	58	P	80	P	1	Homo sapiens fatty-acid-Coenzyme A ligase, long-chain 3 (FACL3), mRNA.
201664_at	SMC4 structural maintenance of chromosomes 4-like 1 (yeast)	SMC4L1	432	P	112	P	4	129	P	60	P	2	147	P	55	P	3	Homo sapiens mRNA; cDNA DKFZp434F205 (from clone DKFZp434F205); complete cds.
201665_x_at	ribosomal protein S17	RPS17	3621	P	1376	P	3	5416	P	1862	P	3	2733	P	1592	P	2	Homo sapiens ribosomal protein S17 (RPS17), mRNA.
201666_at	tissue inhibitor of metalloproteinase 1 (erythroid potentiating activity, collagenase inhibitor)	TIMP1	590	P	322	P	2	171	P	554	P	0	1482	P	868	P	2	Homo sapiens tissue inhibitor of metalloproteinase 1 (erythroid potentiating activity, collagenase inhibitor) (TIMP1), mRNA.
201667_at	gap junction protein, alpha 1, 43kDa (connexin 43)	GJA1	2	A	38	A	0	1	A	1	A	1	7	A	10	A	1	Homo sapiens gap junction protein, alpha 1, 43kD (connexin 43) (GJA1), mRNA.
201669_s_at	myristoylated alanine-rich protein kinase C substrate	MARCKS	248	P	239	P	1	194	P	133	P	1	239	P	123	P	2	Homo sapiens myristoylated alanine-rich protein kinase C substrate (MARCKS, 80K-L) (MACS), mRNA.
201672_s_at	ubiquitin specific protease 14 (tRNA-guanine transglycosylase)	USP14	269	P	220	P	1	381	P	217	P	2	384	P	166	P	2	Homo sapiens ubiquitin specific protease 14 (tRNA-guanine transglycosylase) (USP14), mRNA.
201673_s_at	glycogen synthase 1 (muscle)	GYS1	41	A	92	A	0	110	A	122	A	1	93	P	178	A	1	Homo sapiens glycogen synthase 1 (muscle) (GYS1), mRNA.
201675_at	A kinase (PRKA) anchor protein 1	AKAP1	147	P	92	A	2	70	A	94	A	1	93	P	84	A	1	Homo sapiens A kinase (PRKA) anchor protein 1 (AKAP1), mRNA.
201681_s_at	discs, large (Drosophila) homolog 5	DLG5	696	P	33	A	21	399	P	3	A	133	37	P	50	A	1	Homo sapiens mRNA for KIAA0583 protein, partial cds.
201682_at	peptidase (mitochondrial processing) beta	PMPCB	312	P	145	A	2	522	P	26	A	20	492	P	232	A	2	Homo sapiens peptidase (mitochondrial processing) beta (PMPCB), mRNA.
201687_s_at	apoptosis inhibitor 5	API5	122	P	69	A	2	102	P	48	A	2	85	P	17	A	5	Homo sapiens API5-like 1 (API5L1), mRNA.
201690_s_at	tumor protein D52	TPD52	828	P	110	M	8	1222	P	113	P	11	151	P	90	A	2	EST
201692_at	type I sigma receptor	SR-BP1	161	P	70	M	2	89	P	112	P	1	61	A	24	A	3	Homo sapiens sigma receptor (SR31747 binding protein 1) (SR-BP1), mRNA.
201694_s_at	early growth response 1	EGR1	1020	P	898	P	1	890	P	274	P	3	2506	P	1034	P	2	Homo sapiens early growth response 1 (EGR1), mRNA.
201695_s_at	nucleoside phosphorylase	NP	228	P	293	P	1	219	P	916	P	0	517	P	607	P	1	Homo sapiens nucleoside phosphorylase (NP), mRNA.
201696_at	splicing factor, arginine/serine-rich 4	SFRS4	56	P	179	A	0	148	P	139	A	1	218	P	244	A	1	Homo sapiens splicing factor, arginineserine-rich 4 (SFRS4), mRNA.
201697_s_at	DNA (cytosine-5-)-methyltransferase 1	DNMT1	165	A	193	A	1	196	P	519	A	0	251	P	294	A	1	Homo sapiens DNA (cytosine-5-)-methyltransferase 1 (DNMT1), mRNA.
201698_s_at	splicing factor, arginine/serine-rich 9	SFRS9	511	P	242	P	2	815	P	332	P	2	673	P	328	P	2	Homo sapiens splicing factor, arginineserine-rich 9 (SFRS9), mRNA.
201699_at	proteasome (prosome, macropain) 26S subunit, ATPase, 6	PSMC6	309	P	191	P	2	221	P	153	P	1	258	P	165	P	2	Homo sapiens proteasome (prosome, macropain) 26S subunit, ATPase, 6 (PSMC6), mRNA.
201700_at	cyclin D3	CCND3	235	P	1278	P	0	232	P	1098	P	0	1212	P	1104	P	1	Homo sapiens cyclin D3 (CCND3), mRNA.
201701_s_at	progesterone receptor membrane component 2	PGRMC2	52	P	24	M	2	47	P	20	A	2	19	A	4	A	5	Homo sapiens progesterone membrane binding protein (PMBP), mRNA.
201703_s_at	protein phosphatase 1, regulatory subunit 10	PPP1R10	114	A	128	A	1	108	A	147	A	1	128	A	191	A	1	Homo sapiens protein phosphatase 1, regulatory subunit 10 (PPP1R10), mRNA.
201704_at	ectonucleoside triphosphate diphosphohydrolase 6 (putative function)	ENTPD6	570	P	197	A	3	180	A	69	A	3	402	P	168	A	2	Homo sapiens ectonucleoside triphosphate diphosphohydrolase 6 (putative function) (ENTPD6), mRNA.
201705_at	proteasome (prosome, macropain) 26S subunit, non-ATPase, 7 (Mov34 homolog)	PSMD7	194	A	237	A	1	191	A	192	A	1	115	A	222	A	1	Homo sapiens proteasome (prosome, macropain) 26S subunit, non-ATPase, 7 (Mov34 homolog) (PSMD7), mRNA.
201707_at	peroxisomal farnesylated protein	PXF	59	P	60	A	1	52	A	18	A	3	33	A	17	A	2	Homo sapiens peroxisomal farnesylated protein (PXF), mRNA.
201709_s_at	nipsnap homolog 1 (C. elegans)	NIPSNAP1	549	P	207	A	3	418	P	227	A	2	335	P	238	A	1	Homo sapiens NIPSNAP, C. elegans, homolog 1 (NIPSNAP1), mRNA.
201710_at	v-myb myeloblastosis viral oncogene homolog (avian)-like 2	MYBL2	54	A	12	A	5	55	A	22	A	3	40	A	23	A	2	Homo sapiens v-myb avian myeloblastosis viral oncogene homolog-like 2 (MYBL2), mRNA.
201713_s_at	RAN binding protein 2	RANBP2	94	P	89	P	1	187	P	74	P	3	112	P	67	A	2	Human mRNA for RanBP2 (Ran-binding protein 2), complete cds.
201714_at	tubulin, gamma 1	TUBG1	101	P	6	A	17	92	P	34	A	3	47	M	4	A	13	Homo sapiens tubulin, gamma 1 (TUBG1), mRNA.
201716_at	sorting nexin 1	SNX1	169	P	225	A	1	376	P	252	A	1	344	P	264	P	1	Homo sapiens sorting nexin 1 (SNX1), mRNA.
201717_at	mitochondrial ribosomal protein L49	MRPL49	380	P	357	P	1	421	P	373	A	1	395	P	409	P	1	Homo sapiens chromosome 11 open reading frame 4 (C11ORF4), mRNA.
201719_s_at	erythrocyte membrane protein band 4.1-like 2	EPB41L2	148	P	64	A	2	32	A	52	A	1	65	A	9	A	7	Homo sapiens erythrocyte membrane protein band 4.1-like 2 (EPB41L2), mRNA.
201721_s_at	Lysosomal-associated multispanning membrane protein-5	LAPTM5	459	P	3876	P	0	1394	P	3522	P	0	4585	P	3873	P	1	Homo sapiens Lysosomal-associated multispanning membrane protein-5 (LAPTM5), mRNA.
201722_s_at	UDP-N-acetyl-alpha-D-galactosamine:polypeptide N-acetylgalactosaminyltransferase 1 (GalNAc-T1)	GALNT1	116	P	129	P	1	119	P	222	P	1	125	P	152	P	1	EST
201725_at	chromosome 10 open reading frame 7	C10orf7	490	P	308	P	2	533	P	334	P	2	398	P	449	P	1	Homo sapiens D123 gene product (D123), mRNA.
201726_at	ELAV (embryonic lethal, abnormal vision, Drosophila)-like 1 (Hu antigen R)	ELAVL1	295	P	102	P	3	202	P	86	M	2	480	P	156	P	3	Homo sapiens, ELAV (embryonic lethal, abnormal vision, Drosophila)-like 1 (Hu antigen R), clone MGC:5084, mRNA, complete cds.
201730_s_at	translocated promoter region (to activated MET oncogene)	TPR	461	P	373	P	1	753	P	297	P	3	254	P	258	P	1	EST
201734_at	Homo sapiens mRNA; cDNA DKFZp564I0463 (from clone DKFZp564I0463)		166	P	273	P	1	358	P	402	P	1	242	P	271	P	1	EST
201737_s_at	similar to S. cerevisiae SSM4	TEB4	84	P	137	P	1	30	P	70	P	0	18	P	103	P	0	Homo sapiens similar to S. cerevisiae SSM4 (TEB4), mRNA.
201738_at	translation factor sui1 homolog	GC20	143	P	965	P	0	306	P	2148	P	0	368	P	596	P	1	Homo sapiens translation factor sui1 homolog (GC20), mRNA.
201739_at	serum/glucocorticoid regulated kinase	SGK	54	A	196	P	0	57	A	157	P	0	385	P	200	P	2	Homo sapiens serumglucocorticoid regulated kinase (SGK), mRNA.
201740_at	NADH dehydrogenase (ubiquinone) Fe-S protein 3, 30kDa (NADH-coenzyme Q reductase)	NDUFS3	282	P	181	M	2	655	P	196	A	3	409	P	220	P	2	Homo sapiens NADH dehydrogenase (ubiquinone) Fe-S protein 3 (30kD) (NADH-coenzyme Q reductase) (NDUFS3), mRNA.
201743_at	CD14 antigen	CD14	176	P	925	P	0	227	P	725	P	0	2688	P	1117	P	2	Homo sapiens CD14 antigen (CD14), mRNA.
201744_s_at	lumican	LUM	1	A	1	A	1	6	A	1	A	5	1	A	1	A	1	Homo sapiens lumican (LUM), mRNA.
201745_at	PTK9 protein tyrosine kinase 9	PTK9	150	P	95	P	2	147	P	116	P	1	91	P	99	P	1	Homo sapiens protein tyrosine kinase 9 (PTK9), mRNA.
201746_at	tumor protein p53 (Li-Fraumeni syndrome)	TP53	95	P	90	A	1	126	P	70	A	2	73	P	32	A	2	Homo sapiens tumor protein p53 (Li-Fraumeni syndrome) (TP53), mRNA.
201748_s_at	scaffold attachment factor B	SAFB	95	P	156	P	1	152	P	105	P	1	117	P	120	P	1	Homo sapiens scaffold attachment factor B (SAFB), mRNA.
201749_at	Homo sapiens, clone IMAGE:4845226, mRNA		123	P	220	P	1	94	P	165	A	1	134	P	244	P	1	EST
201753_s_at	adducin 3 (gamma)	ADD3	95	P	759	P	0	264	P	436	P	1	315	P	480	P	1	Homo sapiens adducin 3 (gamma) (ADD3), transcript variant 2, mRNA.
201754_at	cytochrome c oxidase subunit VIc	COX6C	2579	P	321	P	8	1020	P	349	P	3	928	P	378	P	2	Homo sapiens cytochrome c oxidase subunit VIc (COX6C), nuclear gene encoding mitochondrial protein, mRNA.
201756_at	replication protein A2, 32kDa	RPA2	206	P	401	P	1	259	P	235	P	1	237	P	239	P	1	Homo sapiens replication protein A2 (32kD) (RPA2), mRNA.
201757_at	NADH dehydrogenase (ubiquinone) Fe-S protein 5, 15kDa (NADH-coenzyme Q reductase)	NDUFS5	660	P	473	P	1	3527	P	455	P	8	1236	P	686	P	2	Homo sapiens NADH dehydrogenase (ubiquinone) Fe-S protein 5 (15kD) (NADH-coenzyme Q reductase) (NDUFS5), mRNA.
201758_at	tumor susceptibility gene 101	TSG101	773	P	363	P	2	772	P	370	P	2	606	P	523	P	1	Homo sapiens tumor susceptibility gene 101 (TSG101), mRNA.
201759_at	tubulin-specific chaperone d	TBCD	125	P	196	A	1	85	P	243	M	0	83	P	149	A	1	EST
201760_s_at	likely ortholog of mouse WD-40-repeat-containing protein with a SOCS box 2	WSB2	137	P	218	P	1	371	P	86	A	4	209	P	61	A	3	Homo sapiens CS box-containing WD protein (LOC55884), mRNA.
201761_at	methylene tetrahydrofolate dehydrogenase (NAD+ dependent), methenyltetrahydrofolate cyclohydrolase	MTHFD2	688	P	343	P	2	315	P	226	P	1	384	P	198	P	2	Homo sapiens methylene tetrahydrofolate dehydrogenase (NAD+ dependent), methenyltetrahydrofolate cyclohydrolase (MTHFD2), nuclear gene encoding mitochondrial protein, mRNA.
201762_s_at	proteasome (prosome, macropain) activator subunit 2 (PA28 beta)	PSME2	1826	P	1595	P	1	1501	P	891	P	2	1576	P	540	P	3	Homo sapiens proteasome (prosome, macropain) activator subunit 2 (PA28 beta) (PSME2), mRNA.
201765_s_at	hexosaminidase A (alpha polypeptide)	HEXA	217	P	105	A	2	98	A	214	A	0	170	M	106	A	2	EST
201767_s_at	elaC homolog 2 (E. coli)	ELAC2	64	A	13	A	5	50	A	9	A	6	95	A	8	A	11	Homo sapiens putative prostate cancer susceptibility protein (HPC2), mRNA.
201770_at	small nuclear ribonucleoprotein polypeptide A	SNRPA	196	P	26	A	8	113	A	28	A	4	160	P	22	A	7	Homo sapiens small nuclear ribonucleoprotein polypeptide A (SNRPA), mRNA.
201771_at	secretory carrier membrane protein 3	SCAMP3	573	P	195	P	3	621	P	321	A	2	252	P	283	A	1	Homo sapiens secretory carrier membrane protein 3 (SCAMP3), mRNA.
201772_at	ornithine decarboxylase antizyme inhibitor	OAZIN	98	P	101	P	1	90	P	97	P	1	63	P	70	A	1	Homo sapiens antizyme inhibitor (LOC51582), mRNA.
201779_s_at	ring finger protein 13	RNF13	234	P	652	P	0	406	P	709	P	1	257	P	876	P	0	Homo sapiens clone 24450 RING zinc finger protein RZF mRNA, complete cds.
201781_s_at	ESTs, Highly similar to aryl hydrocarbon receptor-interacting protein; HBV-X associated protein [Homo sapiens] [H.sapiens]		40	M	73	P	1	82	P	48	A	2	26	A	50	A	1	EST
201783_s_at	v-rel reticuloendotheliosis viral oncogene homolog A, nuclear factor of kappa light polypeptide gene enhancer in B-cells 3, p65 (avian)	RELA	245	P	388	P	1	270	P	355	P	1	218	P	446	P	0	Homo sapiens v-rel avian reticuloendotheliosis viral oncogene homolog A (nuclear factor of kappa light polypeptide gene enhancer in B-cells 3 (p65)) (RELA), mRNA.
201784_s_at	small acidic protein	SMAP	518	P	386	P	1	426	P	290	P	1	408	P	242	P	2	Homo sapiens small acidic protein (IMAGE145052), mRNA.
201785_at	ribonuclease, RNase A family, 1 (pancreatic)	RNASE1	24	A	82	A	0	45	A	26	A	2	83	A	98	A	1	Homo sapiens ribonuclease, RNase A family, 1 (pancreatic) (RNASE1), mRNA.
201786_s_at	adenosine deaminase, RNA-specific	ADAR	2783	P	2488	P	1	1008	P	1082	P	1	1822	P	1195	P	2	Homo sapiens adenosine deaminase, RNA-specific (ADAR), transcript variant ADAR-a, mRNA.
201788_at	RNA helicase-related protein	RNAHP	502	P	331	P	2	277	P	360	P	1	241	P	108	P	2	Homo sapiens RNA helicase-related protein (RNAHP), mRNA.
201791_s_at	7-dehydrocholesterol reductase	DHCR7	71	P	37	A	2	52	A	12	A	4	49	A	33	A	1	Homo sapiens 7-dehydrocholesterol reductase (DHCR7), mRNA.
201792_at	AE binding protein 1	AEBP1	16	A	13	A	1	5	A	24	A	0	4	A	28	A	0	Homo sapiens AE-binding protein 1 (AEBP1), mRNA.
201795_at	lamin B receptor	LBR	128	P	917	P	0	444	P	430	P	1	1881	P	518	P	4	Homo sapiens lamin B receptor (LBR), mRNA.
201797_s_at	valyl-tRNA synthetase 2	VARS2	80	M	10	A	8	60	P	5	A	11	87	P	11	A	8	Homo sapiens valyl-tRNA synthetase 2 (VARS2), mRNA.
201798_s_at	fer-1-like 3, myoferlin (C. elegans)	FER1L3	764	P	302	P	3	106	P	132	A	1	327	P	177	P	2	Homo sapiens fer-1 (C.elegans)-like 3 (myoferlin) (FER1L3), mRNA.
201800_s_at	oxysterol binding protein	OSBP	153	P	277	M	1	171	P	337	A	1	131	P	369	A	0	Homo sapiens oxysterol-binding protein 1 (OSBP1) mRNA, complete cds.
201801_s_at	solute carrier family 29 (nucleoside transporters), member 1	SLC29A1	11	A	40	A	0	1	A	5	A	0	4	A	7	A	1	Homo sapiens equilibrative NBMPR-sensitive nucleoside transporter (ENT1) mRNA, complete cds.
201803_at	polymerase (RNA) II (DNA directed) polypeptide B, 140kDa	POLR2B	316	P	228	A	1	473	P	238	M	2	589	P	424	A	1	Homo sapiens polymerase (RNA) II (DNA directed) polypeptide B (140kD) (POLR2B), mRNA.
201805_at	protein kinase, AMP-activated, gamma 1 non-catalytic subunit	PRKAG1	214	P	80	A	3	300	P	193	A	2	92	A	29	A	3	Homo sapiens protein kinase, AMP-activated, gamma 1 non-catalytic subunit (PRKAG1), mRNA.
201806_s_at	ataxin 2 related protein	A2LP	36	A	44	A	1	29	A	24	A	1	26	A	163	A	0	Homo sapiens ataxin 2 related protein (A2LP), transcript variant 1, mRNA.
201807_at	vacuolar protein sorting 26 (yeast)	VPS26	285	P	222	P	1	506	P	262	P	2	379	P	204	P	2	Homo sapiens vacuolar protein sorting 26 (yeast homolog) (VPS26), mRNA.
201809_s_at	endoglin (Osler-Rendu-Weber syndrome 1)	ENG	8	A	19	A	0	16	A	11	A	1	64	A	10	A	7	Homo sapiens endoglin (Osler-Rendu-Weber syndrome 1) (ENG), mRNA.
201810_s_at	SH3-domain binding protein 5 (BTK-associated)	SH3BP5	145	P	541	P	0	250	P	429	P	1	254	P	614	P	0	EST
201812_s_at	homolog of Tom7 (S. cerevisiae)	TOM7	1010	P	427	P	2	2319	P	1114	P	2	1298	P	1070	P	1	Homo sapiens 6.2 kd protein (LOC54543), mRNA.
201816_s_at	glioblastoma amplified sequence	GBAS	56	P	63	P	1	128	P	31	A	4	140	P	53	P	3	Homo sapiens glioblastoma amplified sequence (GBAS), mRNA.
201819_at	scavenger receptor class B, member 1	SCARB1	73	P	91	A	1	57	A	195	A	0	45	A	179	A	0	Homo sapiens CD36 antigen (collagen type I receptor, thrombospondin receptor)-like 1 (CD36L1), mRNA.
201820_at	keratin 5 (epidermolysis bullosa simplex, Dowling-Meara/Kobner/Weber-Cockayne types)	KRT5	20	A	40	A	0	41	A	39	A	1	55	A	89	A	1	Homo sapiens keratin 5 (epidermolysis bullosa simplex, Dowling-MearaKobnerWeber-Cockayne types) (KRT5), mRNA.
201823_s_at	ring finger protein 14	RNF14	108	P	91	P	1	111	P	136	P	1	78	P	94	P	1	Homo sapiens ring finger protein 14 (RNF14), mRNA.
201827_at	SWI/SNF related, matrix associated, actin dependent regulator of chromatin, subfamily d, member 2	SMARCD2	437	P	190	P	2	168	P	112	P	1	201	P	178	P	1	Homo sapiens PRO2451 mRNA, complete cds.
201828_x_at	CAAX box 1	CXX1	315	P	403	A	1	260	A	381	A	1	396	P	420	A	1	Homo sapiens CAAX box 1 (CXX1), mRNA.
201829_at	neuroepithelial cell transforming gene 1	NET1	300	P	68	A	4	188	P	18	A	10	56	A	30	A	2	EST
201832_s_at	vesicle docking protein p115	VDP	321	P	317	P	1	547	P	308	P	2	328	P	255	P	1	Homo sapiens vesicle docking protein p115 (P115), mRNA.
201833_at	histone deacetylase 2	HDAC2	275	P	128	P	2	286	P	79	P	4	123	P	68	P	2	Homo sapiens histone deacetylase 2 (HDAC2), mRNA.
201835_s_at	protein kinase, AMP-activated, beta 1 non-catalytic subunit	PRKAB1	4	A	83	A	0	25	A	118	A	0	18	A	154	A	0	Homo sapiens protein kinase, AMP-activated, beta 1 non-catalytic subunit (PRKAB1), mRNA.
201839_s_at	tumor-associated calcium signal transducer 1	TACSTD1	729	P	2	A	291	634	P	16	A	39	680	P	5	A	139	Homo sapiens tumor-associated calcium signal transducer 1 (TACSTD1), mRNA.
201840_at	neural precursor cell expressed, developmentally down-regulated 8	NEDD8	223	P	57	A	4	266	P	214	A	1	401	P	82	P	5	Homo sapiens neural precursor cell expressed, developmentally down-regulated 8 (NEDD8), mRNA.
201841_s_at	heat shock 27kDa protein 1	HSPB1	1181	P	9	A	131	139	M	7	A	20	100	A	6	A	17	Homo sapiens heat shock 27kD protein 1 (HSPB1), mRNA.
201843_s_at	EGF-containing fibulin-like extracellular matrix protein 1	EFEMP1	51	A	4	A	11	2	A	31	A	0	2	A	19	A	0	Homo sapiens EGF-containing fibulin-like extracellular matrix protein 1 (EFEMP1), transcript variant 1, mRNA.
201845_s_at	RING1 and YY1 binding protein	RYBP	100	P	244	P	0	156	P	142	M	1	319	P	197	P	2	Homo sapiens YEAF1 mRNA for YY1 and E4TF1 associated factor 1, complete cds.
201847_at	lipase A, lysosomal acid, cholesterol esterase (Wolman disease)	LIPA	375	P	294	P	1	173	P	413	P	0	1147	P	546	P	2	Homo sapiens lipase A, lysosomal acid, cholesterol esterase (Wolman disease) (LIPA), mRNA.
201849_at	BCL2/adenovirus E1B 19kDa interacting protein 3	BNIP3	120	P	74	P	2	525	P	45	A	12	57	P	51	A	1	Homo sapiens BCL2adenovirus E1B 19kD-interacting protein 3 (BNIP3), nuclear gene encoding mitochondrial protein, mRNA.
201850_at	capping protein (actin filament), gelsolin-like	CAPG	276	P	180	P	2	61	P	164	A	0	98	P	252	P	0	Homo sapiens capping protein (actin filament), gelsolin-like (CAPG), mRNA.
201851_at	SH3-domain GRB2-like 1	SH3GL1	88	A	33	A	3	31	A	60	A	1	95	A	15	A	6	Homo sapiens SH3-domain GRB2-like 1 (SH3GL1), mRNA.
201853_s_at	cell division cycle 25B	CDC25B	221	P	505	P	0	254	P	524	P	0	677	P	505	P	1	Homo sapiens cell division cycle 25B (CDC25B), transcript variant 3, mRNA.
201857_at	zinc finger RNA binding protein	ZFR	450	P	286	P	2	517	P	309	P	2	468	P	411	P	1	Homo sapiens M-phase phosphoprotein homolog (LOC51663), mRNA.
201859_at	proteoglycan 1, secretory granule	PRG1	483	P	4249	P	0	1013	P	4451	P	0	1625	P	3582	P	0	Homo sapiens proteoglycan 1, secretory granule (PRG1), mRNA.
201860_s_at	plasminogen activator, tissue	PLAT	89	P	62	A	1	16	A	68	A	0	4	A	46	A	0	Homo sapiens plasminogen activator, tissue (PLAT), mRNA.
201862_s_at	leucine rich repeat (in FLII) interacting protein 1	LRRFIP1	114	P	259	P	0	170	P	318	P	1	357	P	423	P	1	Homo sapiens leucine rich repeat (in FLII) interacting protein 1 (LRRFIP1), mRNA.
201864_at	GDP dissociation inhibitor 1	GDI1	189	P	294	P	1	160	P	109	A	1	203	P	144	A	1	Homo sapiens GDP dissociation inhibitor 1 (GDI1), mRNA.
201870_at	translocase of outer mitochondrial membrane 34	TOMM34	311	P	180	A	2	243	P	152	A	2	230	P	220	A	1	Homo sapiens translocase of outer mitochondrial membrane 34 (TOM34), mRNA.
201871_s_at	ORF	LOC51035	305	P	326	A	1	469	P	474	A	1	970	P	521	A	2	Homo sapiens ORF (LOC51035), mRNA.
201872_s_at	ATP-binding cassette, sub-family E (OABP), member 1	ABCE1	150	P	88	P	2	188	P	124	M	2	90	P	106	M	1	EST
201876_at	paraoxonase 2	PON2	811	P	74	A	11	141	A	65	A	2	252	P	14	A	18	Homo sapiens paraoxonase 2 (PON2), mRNA.
201877_s_at	protein phosphatase 2, regulatory subunit B (B56), gamma isoform	PPP2R5C	228	P	480	P	0	216	P	369	P	1	362	P	372	P	1	Homo sapiens protein phosphatase 2, regulatory subunit B (B56), gamma isoform (PPP2R5C), mRNA.
201880_at	ariadne homolog, ubiquitin-conjugating enzyme E2 binding protein, 1 (Drosophila)	ARIH1	68	A	67	A	1	64	A	72	A	1	75	P	11	A	7	EST
201883_s_at	UDP-Gal:betaGlcNAc beta 1,4- galactosyltransferase, polypeptide 1	B4GALT1	184	P	157	A	1	104	P	317	A	0	82	P	230	P	0	Human mRNA for beta-1,4-galactosyltransferase, complete cds.
201884_at	carcinoembryonic antigen-related cell adhesion molecule 5	CEACAM5	223	P	78	P	3	24	A	72	A	0	553	P	74	A	8	Homo sapiens carcinoembryonic antigen-related cell adhesion molecule 5 (CEACAM5), mRNA.
201885_s_at	diaphorase (NADH) (cytochrome b-5 reductase)	DIA1	541	P	668	P	1	863	P	1013	P	1	592	P	671	P	1	Homo sapiens diaphorase (NADH) (cytochrome b-5 reductase) (DIA1), nuclear gene encoding mitochondrial protein, transcript variant M, mRNA.
201886_at	WD repeat domain 23	WDR23	264	P	419	P	1	205	P	424	P	0	266	P	311	P	1	Homo sapiens hypthetical protein PRO2389 (PRO2389), mRNA.
201887_at	interleukin 13 receptor, alpha 1	IL13RA1	566	P	1062	P	1	191	P	367	P	1	482	P	706	P	1	Homo sapiens interleukin 13 receptor, alpha 1 (IL13RA1), mRNA.
201891_s_at	beta-2-microglobulin	B2M	6083	P	9845	P	1	5175	P	12729	P	0	4177	P	8171	P	1	Homo sapiens beta-2-microglobulin (B2M), mRNA.
201892_s_at	IMP (inosine monophosphate) dehydrogenase 2	IMPDH2	1295	P	109	A	12	5565	P	30	A	184	624	P	106	A	6	Homo sapiens IMP (inosine monophosphate) dehydrogenase 2 (IMPDH2), mRNA.
201894_s_at	decorin	DCN	88	P	120	P	1	127	P	142	P	1	85	P	82	P	1	Homo sapiens decorin (DCN), mRNA.
201895_at	v-raf murine sarcoma 3611 viral oncogene homolog 1	ARAF1	93	A	155	A	1	135	A	183	A	1	66	A	123	A	1	Homo sapiens v-raf murine sarcoma 3611 viral oncogene homolog 1 (ARAF1), mRNA.
201897_s_at	CDC28 protein kinase regulatory subunit 1B	CKS1B	430	P	48	A	9	244	P	116	A	2	95	P	82	A	1	Homo sapiens CDC28 protein kinase 1 (CKS1), mRNA.
201899_s_at	ubiquitin-conjugating enzyme E2A (RAD6 homolog)	UBE2A	281	P	310	P	1	282	P	181	P	2	326	P	130	P	3	Homo sapiens ubiquitin-conjugating enzyme E2A (RAD6 homolog) (UBE2A), mRNA.
201900_s_at	aldo-keto reductase family 1, member A1 (aldehyde reductase)	AKR1A1	489	P	292	A	2	1219	P	317	A	4	362	P	231	A	2	Homo sapiens aldo-keto reductase family 1, member A1 (aldehyde reductase) (AKR1A1), mRNA.
201901_s_at	YY1 transcription factor	YY1	336	P	370	P	1	400	P	406	P	1	395	P	273	P	1	H.sapiens mRNA for YY1NF-E1 protein.
201903_at	ubiquinol-cytochrome c reductase core protein I	UQCRC1	228	P	24	A	9	803	P	236	A	3	775	P	276	A	3	Homo sapiens ubiquinol-cytochrome c reductase core protein I (UQCRC1), mRNA.
201908_at	dishevelled, dsh homolog 3 (Drosophila)	DVL3	131	P	116	A	1	71	P	26	A	3	121	P	79	A	2	Homo sapiens dishevelled 3 (homologous to Drosophila dsh) (DVL3), mRNA.
201909_at	ribosomal protein S4, Y-linked	RPS4Y	65	A	92	A	1	6380	P	1867	P	3	1670	P	1748	P	1	Homo sapiens ribosomal protein S4, Y-linked (RPS4Y), mRNA.
201911_s_at	FERM, RhoGEF (ARHGEF) and pleckstrin domain protein 1 (chondrocyte-derived)	FARP1	110	P	14	A	8	13	A	7	A	2	4	A	8	A	0	Homo sapiens FERM, RhoGEF (ARHGEF) and pleckstrin domain protein 1 (chondrocyte-derived) (FARP1), mRNA.
201912_s_at	G1 to S phase transition 1	GSPT1	116	P	279	P	0	253	P	1891	P	0	125	P	797	P	0	Homo sapiens G1 to S phase transition 1 (GSPT1), mRNA.
201913_s_at	nucleotide binding protein	NBP	590	P	378	A	2	302	P	353	P	1	466	P	379	P	1	Homo sapiens nucleotide binding protein (NBP), mRNA.
201916_s_at	SEC63 protein	SEC63L	182	P	105	P	2	148	P	111	P	1	98	P	133	P	1	Homo sapiens SEC63, endoplasmic reticulum translocon component (S. cerevisiae) like (SEC63L), mRNA.
201920_at	solute carrier family 20 (phosphate transporter), member 1	SLC20A1	302	P	329	P	1	184	P	92	P	2	416	P	240	P	2	Homo sapiens solute carrier family 20 (phosphate transporter), member 1 (SLC20A1), mRNA.
201921_at	guanine nucleotide binding protein (G protein), gamma 10	GNG10	443	P	2498	P	0	573	P	745	P	1	798	P	921	P	1	Homo sapiens guanine nucleotide binding protein 10 (GNG10), mRNA.
201923_at	peroxiredoxin 4	PRDX4	746	P	155	P	5	859	P	143	P	6	239	P	138	P	2	Homo sapiens thioredoxin peroxidase (antioxidant enzyme) (AOE372), mRNA.
201924_at	myeloid/lymphoid or mixed-lineage leukemia (trithorax homolog, Drosophila); translocated to, 2	MLLT2	204	P	596	P	0	430	P	304	P	1	193	P	155	P	1	Homo sapiens myeloidlymphoid or mixed-lineage leukemia (trithorax (Drosophila) homolog); translocated to, 2 (MLLT2), mRNA.
201925_s_at	decay accelerating factor for complement (CD55, Cromer blood group system)	DAF	230	P	440	P	1	52	P	250	P	0	515	P	571	P	1	Homo sapiens decay accelerating factor for complement (CD55, Cromer blood group system) (DAF), mRNA.
201928_at	plakophilin 4	PKP4	215	P	38	A	6	82	P	44	A	2	67	P	81	P	1	EST
201930_at	MCM6 minichromosome maintenance deficient 6 (MIS5 homolog, S. pombe) (S. cerevisiae)	MCM6	342	P	128	A	3	290	P	125	A	2	131	P	145	A	1	Homo sapiens minichromosome maintenance deficient (mis5, S. pombe) 6 (MCM6), mRNA.
201931_at	electron-transfer-flavoprotein, alpha polypeptide (glutaric aciduria II)	ETFA	125	P	100	P	1	134	P	183	P	1	216	P	72	P	3	Homo sapiens electron-transfer-flavoprotein, alpha polypeptide (glutaric aciduria II) (ETFA), nuclear gene encoding mitochondrial protein, mRNA.
201933_at	procollagen (type III) N-endopeptidase	PCOLN3	119	P	171	P	1	8	A	170	A	0	213	P	43	A	5	Homo sapiens procollagen (type III) N-endopeptidase (PCOLN3), mRNA.
201935_s_at	eukaryotic translation initiation factor 4 gamma, 3	EIF4G3	94	P	222	P	0	163	P	108	P	2	81	P	118	P	1	EST
201938_at	CDK2-associated protein 1	CDK2AP1	734	P	161	P	5	656	P	231	P	3	596	P	314	P	2	Homo sapiens deleted in oral cancer (mouse, homolog) 1 (DOC1), mRNA.
201939_at	serum-inducible kinase	SNK	1222	P	26	A	48	30	P	40	A	1	20	P	9	A	2	Homo sapiens serum-inducible kinase (SNK), mRNA.
201941_at	carboxypeptidase D	CPD	285	P	214	A	1	185	P	290	A	1	186	P	444	A	0	EST
201944_at	hexosaminidase B (beta polypeptide)	HEXB	781	P	441	P	2	771	P	574	P	1	1496	P	830	P	2	Homo sapiens hexosaminidase B (beta polypeptide) (HEXB), mRNA.
201945_at	furin (paired basic amino acid cleaving enzyme)	FURIN	44	A	71	A	1	89	A	291	A	0	31	A	273	A	0	Homo sapiens paired basic amino acid cleaving enzyme (furin, membrane associated receptor protein) (PACE), mRNA.
201946_s_at	chaperonin containing TCP1, subunit 2 (beta)	CCT2	164	P	39	A	4	245	P	88	A	3	41	A	47	A	1	EST
201948_at	nucleolar GTPase	HUMAUANTIG	147	P	143	P	1	172	P	81	A	2	179	P	52	A	3	Homo sapiens nucleolar GTPase (HUMAUANTIG), mRNA.
201952_at	activated leukocyte cell adhesion molecule	ALCAM	1693	P	123	A	14	530	P	155	A	3	236	P	133	M	2	EST
201953_at	calcium and integrin binding 1 (calmyrin)	CIB1	451	P	316	P	1	725	P	222	P	3	292	P	322	P	1	Homo sapiens calcium and integrin binding protein (DNA-dependent protein kinase interacting protein) (SIP2-28), mRNA.
201954_at	actin related protein 2/3 complex, subunit 1B, 41kDa	ARPC1B	687	P	1729	P	0	870	P	1272	P	1	3316	P	2710	P	1	Homo sapiens actin related protein 23 complex, subunit 1A (41 kD) (ARPC1B), mRNA.
201955_at	cyclin C	CCNC	181	P	146	P	1	345	P	192	P	2	209	P	120	P	2	Human DNA sequence from clone RP1-199J3 on chromosome 6 Contains ESTs, STSs, GSSs and CpG islands. Contains part of the gene for a novel protein similar to ubiquitin carboxyl-terminal hudrolase 16 (EC 3.1.2.15), a novel gene, the CCNC gene encodin...
201956_s_at	glyceronephosphate O-acyltransferase	GNPAT	470	P	191	P	2	541	P	159	P	3	311	P	332	P	1	Homo sapiens glyceronephosphate O-acyltransferase (GNPAT), mRNA.
201957_at	protein phosphatase 1, regulatory (inhibitor) subunit 12B	PPP1R12B	56	A	99	A	1	62	A	197	A	0	58	A	38	A	2	Homo sapiens myosin phosphatase target subunit 2 mRNA, complete cds.
201963_at	fatty-acid-Coenzyme A ligase, long-chain 2	FACL2	153	P	2117	P	0	282	P	971	P	0	882	P	1485	P	1	Homo sapiens fatty-acid-Coenzyme A ligase, long-chain 2 (FACL2), mRNA.
201966_at	NADH dehydrogenase (ubiquinone) Fe-S protein 2, 49kDa (NADH-coenzyme Q reductase)	NDUFS2	1313	P	380	A	3	720	P	491	A	1	598	P	457	A	1	Homo sapiens NADH dehydrogenase (ubiquinone) Fe-S protein 2 (49kD) (NADH-coenzyme Q reductase) (NDUFS2), mRNA.
201967_at	RNA binding motif protein 6	RBM6	108	P	119	P	1	85	P	126	P	1	134	P	110	P	1	Homo sapiens RNA binding motif protein 6 (RBM6), mRNA.
201968_s_at	phosphoglucomutase 1	PGM1	74	P	316	P	0	1053	P	362	P	3	754	P	536	P	1	Homo sapiens phosphoglucomutase 1 (PGM1), mRNA.
201969_at	nuclear autoantigenic sperm protein (histone-binding)	NASP	69	P	114	P	1	94	P	107	M	1	87	P	127	P	1	EST
201972_at	ATPase, H+ transporting, lysosomal 70kDa, V1 subunit A, isoform 1	ATP6V1A1	1015	P	1117	P	1	1136	P	1275	P	1	1362	P	1337	P	1	Homo sapiens vacuolar ATPase isoform VA68 mRNA, complete cds.
201975_at	restin (Reed-Steinberg cell-expressed intermediate filament-associated protein)	RSN	160	P	120	P	1	36	P	61	P	1	102	P	75	M	1	Homo sapiens restin (Reed-Steinberg cell-expressed intermediate filament-associated protein) (RSN), mRNA.
201976_s_at	myosin X	MYO10	11	A	21	A	1	108	P	14	A	8	59	A	50	A	1	Homo sapiens myosin X (MYO10), mRNA.
201980_s_at	Ras suppressor protein 1	RSU1	196	P	249	P	1	148	P	243	P	1	214	P	347	P	1	Homo sapiens Ras suppressor protein 1 (RSU1), mRNA.
201987_at	Homo sapiens cDNA FLJ30332 fis, clone BRACE2007254.		322	P	205	P	2	288	P	141	P	2	421	P	272	P	2	EST
201989_s_at	cAMP responsive element binding protein-like 2	CREBL2	241	P	288	P	1	253	P	326	P	1	325	P	223	P	1	EST
201991_s_at	kinesin family member 5B	KIF5B	498	P	619	P	1	821	P	590	P	1	921	P	639	P	1	EST
201994_at	mortality factor 4 like 2	MORF4L2	2055	P	699	P	3	1610	P	425	P	4	1053	P	379	P	3	Homo sapiens MORF-related gene X (KIAA0026), mRNA.
201995_at	exostoses (multiple) 1	EXT1	238	P	119	P	2	65	A	71	A	1	131	P	75	P	2	Homo sapiens exostoses (multiple) 1 (EXT1), mRNA.
201998_at	sialyltransferase 1 (beta-galactoside alpha-2,6-sialyltransferase)	SIAT1	97	A	313	P	0	239	P	279	P	1	242	P	378	M	1	EST
201999_s_at	t-complex-associated-testis-expressed 1-like 1	TCTEL1	993	P	1552	P	1	1577	P	610	P	3	820	P	914	P	1	Homo sapiens t-complex-associated-testis-expressed 1-like 1 (TCTEL1), mRNA.
202001_s_at	NADH dehydrogenase (ubiquinone) 1 alpha subcomplex, 6, 14kDa	NDUFA6	1390	P	948	P	1	1010	P	493	P	2	424	P	316	P	1	Homo sapiens NADH dehydrogenase (ubiquinone) 1 alpha subcomplex, 6 (14kD, B14) (NDUFA6), mRNA.
202003_s_at	acetyl-Coenzyme A acyltransferase 2 (mitochondrial 3-oxoacyl-Coenzyme A thiolase)	ACAA2	178	A	94	A	2	89	A	88	A	1	377	P	30	A	12	Homo sapiens acetyl-Coenzyme A acyltransferase 2 (mitochondrial 3-oxoacyl-Coenzyme A thiolase) (ACAA2), nuclear gene encoding mitochondrial protein, mRNA.
202005_at	suppression of tumorigenicity 14 (colon carcinoma, matriptase, epithin)	ST14	161	P	84	A	2	43	A	65	A	1	117	P	39	A	3	Homo sapiens suppression of tumorigenicity 14 (colon carcinoma, matriptase, epithin) (ST14), mRNA.
202006_at	protein tyrosine phosphatase, non-receptor type 12	PTPN12	63	A	108	A	1	97	A	192	A	1	98	P	122	A	1	Homo sapiens protein tyrosine phosphatase, non-receptor type 12 (PTPN12), mRNA.
202008_s_at	nidogen (enactin)	NID	36	A	50	A	1	33	A	34	A	1	20	A	57	A	0	Homo sapiens nidogen (enactin) (NID), mRNA.
202009_at	PTK9L protein tyrosine kinase 9-like (A6-related protein)	PTK9L	67	A	250	P	0	154	P	237	A	1	260	P	345	P	1	Homo sapiens protein tyrosine kinase 9-like (A6-related protein) (PTK9L), mRNA.
202011_at	tight junction protein 1 (zona occludens 1)	TJP1	322	P	64	A	5	469	P	47	A	10	75	P	47	A	2	Homo sapiens tight junction protein 1 (zona occludens 1) (TJP1), mRNA.
202012_s_at	exostoses (multiple) 2	EXT2	121	P	91	A	1	118	M	100	A	1	107	P	154	A	1	EST
202016_at	mesoderm specific transcript homolog (mouse)	MEST	346	P	135	P	3	359	P	98	P	4	120	P	58	A	2	Homo sapiens mesoderm specific transcript (mouse) homolog (MEST), mRNA.
202017_at	epoxide hydrolase 1, microsomal (xenobiotic)	EPHX1	63	A	24	A	3	48	A	45	A	1	6	A	34	A	0	Homo sapiens epoxide hydrolase 1, microsomal (xenobiotic) (EPHX1), mRNA.
202018_s_at	lactotransferrin	LTF	4	A	217	A	0	157	A	2385	P	0	50	A	415	A	0	Homo sapiens lactotransferrin (LTF), mRNA.
202020_s_at	LanC lantibiotic synthetase component C-like 1 (bacterial)	LANCL1	284	P	140	P	2	282	P	228	P	1	128	P	185	A	1	Homo sapiens LanC (bacterial lantibiotic synthetase component C)-like 1 (LANCL1), mRNA.
202022_at	aldolase C, fructose-bisphosphate	ALDOC	52	A	44	A	1	54	A	91	A	1	45	A	112	A	0	Homo sapiens aldolase C, fructose-bisphosphate (ALDOC), mRNA.
202023_at	ephrin-A1	EFNA1	594	P	10	A	59	359	P	42	A	9	84	A	12	A	7	Homo sapiens ephrin-A1 (EFNA1), mRNA.
202024_at	arsA arsenite transporter, ATP-binding, homolog 1 (bacterial)	ASNA1	270	P	102	A	3	201	P	186	A	1	82	P	213	P	0	Homo sapiens arsA (bacterial) arsenite transporter, ATP-binding, homolog 1 (ASNA1), mRNA.
202025_x_at	acetyl-Coenzyme A acyltransferase 1 (peroxisomal 3-oxoacyl-Coenzyme A thiolase)	ACAA1	112	P	200	P	1	166	P	302	P	1	299	P	259	P	1	Homo sapiens acetyl-Coenzyme A acyltransferase 1 (peroxisomal 3-oxoacyl-Coenzyme A thiolase) (ACAA1), nuclear gene encoding mitochondrial protein, mRNA.
202026_at	succinate dehydrogenase complex, subunit D, integral membrane protein	SDHD	74	P	69	P	1	156	P	18	A	8	120	P	69	A	2	Homo sapiens succinate dehydrogenase complex, subunit D, integral membrane protein (SDHD), nuclear gene encoding mitochondrial protein, mRNA.
202028_s_at	ribosomal protein L38	RPL38	635	P	464	P	1	872	P	839	P	1	344	P	844	P	0	Homo sapiens, ribosomal protein L38, clone MGC:1637, mRNA, complete cds.
202030_at	branched chain alpha-ketoacid dehydrogenase kinase	BCKDK	84	P	56	A	2	86	P	58	A	1	177	P	95	A	2	Homo sapiens branched chain alpha-ketoacid dehydrogenase kinase (BCKDK), mRNA.
202032_s_at	mannosidase, alpha, class 2A, member 2	MAN2A2	184	M	329	P	1	160	P	583	P	0	356	P	290	P	1	Homo sapiens mannosidase, alpha, class 2A, member 2 (MAN2A2), mRNA.
202037_s_at	secreted frizzled-related protein 1	SFRP1	55	A	31	A	2	50	A	95	A	1	48	A	52	A	1	Homo sapiens secreted frizzled-related protein 1 (SFRP1), mRNA.
202038_at	ubiquitination factor E4A (UFD2 homolog, yeast)	UBE4A	208	P	337	P	1	174	P	247	P	1	688	P	369	P	2	Homo sapiens ubiquitination factor E4A (homologous to yeast UFD2) (UBE4A), mRNA.
202039_at	TGFB1-induced anti-apoptotic factor 1	TIAF1	112	P	74	A	2	14	A	108	A	0	126	A	140	A	1	Homo sapiens TGFB1-induced anti-apoptotic factor 1 (TIAF1), mRNA.
202041_s_at	fibroblast growth factor (acidic) intracellular binding protein	FIBP	414	P	283	M	1	585	P	311	A	2	716	P	284	A	3	Homo sapiens fibroblast growth factor (acidic) intracellular binding protein (FIBP), mRNA.
202042_at	histidyl-tRNA synthetase	HARS	216	P	156	P	1	409	P	116	A	4	272	P	75	A	4	Homo sapiens histidyl-tRNA synthetase (HARS), mRNA.
202043_s_at	spermine synthase	SMS	269	P	143	P	2	205	P	53	P	4	90	P	44	A	2	Homo sapiens spermine synthase (SMS), mRNA.
202045_s_at	glucocorticoid receptor DNA binding factor 1	GRLF1	74	A	56	A	1	85	A	120	A	1	50	A	191	A	0	EST
202050_s_at	zinc finger protein 262	ZNF262	39	P	55	A	1	114	P	47	A	2	66	P	75	P	1	EST
202052_s_at	retinoic acid induced 14	RAI14	17	A	7	A	2	64	A	7	A	9	7	A	7	A	1	Homo sapiens novel retinal pigment epithelial gene (NORPEG), mRNA.
202054_s_at	aldehyde dehydrogenase 3 family, member A2	ALDH3A2	124	P	103	A	1	252	P	143	A	2	290	P	98	P	3	Homo sapiens aldehyde dehydrogenase 3 family, member A2 (ALDH3A2), mRNA.
202061_s_at	sel-1 suppressor of lin-12-like (C. elegans)	SEL1L	154	P	96	P	2	170	P	176	P	1	124	P	172	P	1	EST
202066_at	protein tyrosine phosphatase, receptor type, f polypeptide (PTPRF), interacting protein (liprin), alpha 1	PPFIA1	110	P	109	A	1	121	P	117	A	1	171	P	213	M	1	EST
202068_s_at	low density lipoprotein receptor (familial hypercholesterolemia)	LDLR	235	P	229	P	1	235	P	233	P	1	110	P	176	P	1	Homo sapiens low density lipoprotein receptor (familial hypercholesterolemia) (LDLR), mRNA.
202069_s_at	isocitrate dehydrogenase 3 (NAD+) alpha	IDH3A	109	P	44	A	2	46	P	47	P	1	109	P	36	A	3	EST
202071_at	syndecan 4 (amphiglycan, ryudocan)	SDC4	635	P	90	A	7	162	P	46	A	4	114	P	60	A	2	Homo sapiens syndecan 4 (amphiglycan, ryudocan) (SDC4), mRNA.
202073_at	optineurin	OPTN	107	P	121	P	1	92	P	422	P	0	48	P	178	P	0	EST
202075_s_at	phospholipid transfer protein	PLTP	3	A	39	A	0	20	A	20	A	1	22	A	73	A	0	Homo sapiens phospholipid transfer protein (PLTP), mRNA.
202076_at	baculoviral IAP repeat-containing 2	BIRC2	350	P	600	P	1	239	P	628	P	0	686	P	374	P	2	Homo sapiens baculoviral IAP repeat-containing 2 (BIRC2), mRNA.
202077_at	NADH dehydrogenase (ubiquinone) 1, alpha/beta subcomplex, 1, 8kDa	NDUFAB1	979	P	399	P	2	1529	P	384	P	4	656	P	575	P	1	Homo sapiens NADH dehydrogenase (ubiquinone) 1, alphabeta subcomplex, 1 (8kD, SDAP) (NDUFAB1), mRNA.
202078_at	COP9 constitutive photomorphogenic homolog subunit 3 (Arabidopsis)	COPS3	68	P	114	P	1	194	P	271	P	1	95	P	199	P	0	Homo sapiens COP9 (constitutive photomorphogenic, Arabidopsis, homolog) subunit 3 (COPS3), mRNA.
202081_at	immediate early protein	ETR101	6279	P	2896	P	2	1397	P	1586	P	1	1811	P	3289	P	1	Homo sapiens immediate early protein (ETR101), mRNA.
202082_s_at	SEC14-like 1 (S. cerevisiae)	SEC14L1	130	P	646	P	0	172	P	706	P	0	152	P	693	P	0	EST
202085_at	tight junction protein 2 (zona occludens 2)	TJP2	348	P	151	P	2	90	P	88	A	1	143	P	63	A	2	Homo sapiens tight junction protein 2 (zona occludens 2) (TJP2), mRNA.
202086_at	myxovirus (influenza virus) resistance 1, interferon-inducible protein p78 (mouse)	MX1	2127	P	4871	P	0	211	P	365	P	1	634	P	490	P	1	Homo sapiens myxovirus (influenza) resistance 1, homolog of murine (interferon-inducible protein p78) (MX1), mRNA.
202087_s_at	cathepsin L	CTSL	390	P	631	P	1	335	P	172	P	2	654	P	164	P	4	Homo sapiens cathepsin L (CTSL), mRNA.
202088_at	LIV-1 protein, estrogen regulated	LIV-1	3007	P	155	P	19	1502	P	131	P	11	339	P	176	P	2	EST
202090_s_at	ubiquinol-cytochrome c reductase (6.4kD) subunit	UQCR	1163	P	1151	P	1	1821	P	2376	P	1	936	P	2165	P	0	Homo sapiens ubiquinol-cytochrome c reductase (6.4kD) subunit (UQCR), mRNA.
202092_s_at	binder of Arl Two	BART1	154	M	224	A	1	165	A	180	A	1	97	A	263	A	0	EST
202095_s_at	baculoviral IAP repeat-containing 5 (survivin)	BIRC5	110	P	35	A	3	42	A	54	A	1	76	P	33	A	2	Homo sapiens baculoviral IAP repeat-containing 5 (survivin) (BIRC5), mRNA.
202096_s_at	benzodiazapine receptor (peripheral)	BZRP	686	P	630	P	1	1074	P	603	P	2	456	P	1511	P	0	Homo sapiens benzodiazapine receptor (peripheral) (BZRP), nuclear gene encoding mitochondrial protein, transcript variant PBR, mRNA.
202097_at	nucleoporin 153kDa	NUP153	589	P	294	P	2	144	P	273	P	1	251	P	247	P	1	Homo sapiens nucleoporin 153kD (NUP153), mRNA.
202100_at	v-ral simian leukemia viral oncogene homolog B (ras related; GTP binding protein)	RALB	186	P	455	P	0	278	P	356	P	1	202	P	584	P	0	EST
202102_s_at	bromodomain containing 4	BRD4	217	P	556	P	0	355	P	578	P	1	906	P	565	P	2	EST
202104_s_at	spastic paraplegia 7, paraplegin (pure and complicated autosomal recessive)	SPG7	45	A	22	A	2	28	A	15	A	2	55	A	5	A	11	Homo sapiens spastic paraplegia 7, paraplegin (pure and complicated autosomal recessive) (SPG7), mRNA.
202105_at	immunoglobulin (CD79A) binding protein 1	IGBP1	232	P	154	P	2	288	P	168	A	2	227	P	172	A	1	Homo sapiens immunoglobulin (CD79A) binding protein 1 (IGBP1), mRNA.
202106_at	golgi autoantigen, golgin subfamily a, 3	GOLGA3	246	P	105	A	2	244	P	75	A	3	176	P	167	A	1	Homo sapiens golgi autoantigen, golgin subfamily a, 3 (GOLGA3), mRNA.
202107_s_at	MCM2 minichromosome maintenance deficient 2, mitotin (S. cerevisiae)	MCM2	768	P	110	A	7	381	P	145	A	3	178	P	97	A	2	Homo sapiens minichromosome maintenance deficient (S. cerevisiae) 2 (mitotin) (MCM2), mRNA.
202108_at	peptidase D	PEPD	158	P	43	A	4	163	P	103	A	2	119	M	55	A	2	Homo sapiens peptidase D (PEPD), mRNA.
202109_at	partner of RAC1 (arfaptin 2)	POR1	192	A	169	A	1	178	A	84	A	2	105	A	114	A	1	Homo sapiens partner of RAC1 (arfaptin 2) (POR1), mRNA.
202110_at	cytochrome c oxidase subunit VIIb	COX7B	1027	P	747	P	1	1136	P	603	P	2	818	P	544	P	2	Homo sapiens cytochrome c oxidase subunit VIIb (COX7B), mRNA.
202111_at	solute carrier family 4, anion exchanger, member 2 (erythrocyte membrane protein band 3-like 1)	SLC4A2	5	A	8	A	1	4	A	10	A	0	7	A	13	A	1	Homo sapiens solute carrier family 4, anion exchanger, member 2 (erythrocyte membrane protein band 3-like 1) (SLC4A2), mRNA.
202112_at	von Willebrand factor	VWF	6	A	25	A	0	19	A	35	A	1	105	A	127	A	1	Homo sapiens von Willebrand factor (VWF), mRNA.
202114_at	sorting nexin 2	SNX2	194	P	298	P	1	256	P	169	P	2	397	P	223	P	2	Homo sapiens sorting nexin 2 (SNX2), mRNA.
202116_at	requiem, apoptosis response zinc finger gene	REQ	164	P	126	M	1	78	A	88	A	1	53	A	19	A	3	Homo sapiens requiem, apoptosis response zinc finger gene (REQ), mRNA.
202117_at	Rho GTPase activating protein 1	ARHGAP1	1382	P	897	P	2	407	P	743	P	1	987	P	586	P	2	EST
202118_s_at	copine III	CPNE3	339	P	75	P	5	94	P	136	P	1	71	P	77	M	1	EST
202121_s_at	putative breast adenocarcinoma marker (32kD)	BC-2	325	P	254	P	1	424	P	372	P	1	537	P	258	P	2	Homo sapiens putative breast adenocarcinoma marker (32kD) (BC-2), mRNA.
202122_s_at	cargo selection protein (mannose 6 phosphate receptor binding protein)	TIP47	142	P	248	A	1	363	A	303	M	1	124	A	291	A	0	Homo sapiens cargo selection protein (mannose 6 phosphate receptor binding protein) (TIP47), mRNA.
202123_s_at	v-abl Abelson murine leukemia viral oncogene homolog 1	ABL1	85	P	140	A	1	110	P	160	A	1	89	P	97	A	1	Homo sapiens v-abl Abelson murine leukemia viral oncogene homolog 1 (ABL1), transcript variant a, mRNA.
202125_s_at	amyotrophic lateral sclerosis 2 (juvenile) chromosome region, candidate 3	ALS2CR3	321	P	236	P	1	398	P	1653	P	0	209	P	360	P	1	Homo sapiens amyotrophic lateral sclerosis 2 (juvenile) chromosome region, candidate 3 (ALS2CR3), mRNA.
202127_at	PRP4 pre-mRNA processing factor 4 homolog B (yeast)	PRPF4B	83	P	213	P	0	82	P	214	P	0	163	P	101	M	2	Homo sapiens mRNA for KIAA0536 protein, partial cds.
202130_at	sudD suppressor of bimD6 homolog (A. nidulans)	SUDD	138	P	332	P	0	436	P	3516	P	0	439	P	1174	P	0	EST
202133_at	transcriptional co-activator with PDZ-binding motif (TAZ)	TAZ	2	A	3	A	1	75	P	9	A	8	1	A	4	A	0	EST
202135_s_at	ARP1 actin-related protein 1 homolog B, centractin beta (yeast)	ACTR1B	175	P	273	A	1	170	P	368	P	0	130	P	247	A	1	Homo sapiens ARP1 (actin-related protein 1, yeast) homolog B (centractin beta) (ACTR1B), mRNA.
202136_at	adenovirus 5 E1A binding protein	BS69	409	P	280	P	1	497	P	297	P	2	162	P	216	P	1	EST
202138_x_at	JTV1 gene	JTV1	336	P	198	M	2	560	P	203	A	3	456	P	271	A	2	Homo sapiens JTV1 gene (JTV1), mRNA.
202139_at	aldo-keto reductase family 7, member A2 (aflatoxin aldehyde reductase)	AKR7A2	150	P	86	P	2	215	P	106	A	2	140	P	123	A	1	Homo sapiens aldo-keto reductase family 7, member A2 (aflatoxin aldehyde reductase) (AKR7A2), mRNA.
202140_s_at	CDC-like kinase 3	CLK3	149	P	193	P	1	132	P	215	P	1	227	P	283	P	1	Homo sapiens CDC-like kinase 3 (CLK3), transcript variant phclk3, mRNA.
202141_s_at	COP9 homolog	COP9	448	P	186	P	2	330	P	199	P	2	310	P	184	P	2	Homo sapiens, COP9 homolog, clone MGC:1297, mRNA, complete cds.
202144_s_at	adenylosuccinate lyase	ADSL	718	P	376	P	2	1310	P	304	P	4	1282	P	353	P	4	Homo sapiens adenylosuccinate lyase (ADSL), mRNA.
202145_at	lymphocyte antigen 6 complex, locus E	LY6E	255	P	458	P	1	62	A	80	A	1	101	P	130	A	1	Homo sapiens lymphocyte antigen 6 complex, locus E (LY6E), mRNA.
202146_at	interferon-related developmental regulator 1	IFRD1	242	P	494	P	0	141	P	270	P	1	272	P	247	P	1	EST
202148_s_at	pyrroline-5-carboxylate reductase 1	PYCR1	324	P	29	A	11	253	A	38	A	7	73	P	26	A	3	Homo sapiens pyrroline-5-carboxylate reductase 1 (PYCR1), nuclear gene encoding mitochondrial protein, mRNA.
202149_at	enhancer of filamentation 1	HEF1	354	P	407	P	1	150	P	164	P	1	204	P	232	P	1	Human DNA sequence from clone RP4-761I2 on chromosome 6 Contains 3 part of the gene for enhancer of filamentation (HEF1), ESTs, STSs and CpG islands
202151_s_at	putative glialblastoma cell differentiation-related	GDBR1	118	A	76	A	2	165	A	321	P	1	212	P	135	P	2	Homo sapiens putative glialblastoma cell differentiation-related (GDBR1), mRNA.
202152_x_at	upstream transcription factor 2, c-fos interacting	USF2	77	A	44	A	2	41	A	46	A	1	100	A	56	A	2	Homo sapiens upstream transcription factor 2, c-fos interacting (USF2), mRNA.
202154_x_at	tubulin, beta, 4	TUBB4	206	P	60	M	3	457	P	176	P	3	228	P	138	A	2	Homo sapiens tubulin, beta, 4 (TUBB4), mRNA.
202155_s_at	nucleoporin 214kDa	NUP214	191	P	546	P	0	164	P	399	P	0	466	P	446	P	1	Homo sapiens nucleoporin 214kD (CAIN) (NUP214), mRNA.
202157_s_at	CUG triplet repeat, RNA binding protein 2	CUGBP2	170	P	2474	P	0	407	P	1605	P	0	1067	P	1680	P	1	Homo sapiens RNA-binding protein BRUNOL3 (BRUNOL3) mRNA, complete cds.
202159_at	phenylalanine-tRNA synthetase-like	FARSL	196	P	198	A	1	316	M	247	A	1	280	P	188	A	1	Homo sapiens phenylalanine-tRNA synthetase-like (FARSL), mRNA.
202160_at	CREB binding protein (Rubinstein-Taybi syndrome)	CREBBP	180	P	474	P	0	153	P	392	P	0	246	P	425	P	1	Homo sapiens CREB binding protein (Rubinstein-Taybi syndrome) (CREBBP), mRNA.
202161_at	protein kinase C-like 1	PRKCL1	44	A	125	A	0	86	A	102	A	1	123	A	97	A	1	Homo sapiens protein kinase C-like 1 (PRKCL1), mRNA.
202164_s_at	CCR4-NOT transcription complex, subunit 8	CNOT8	67	P	89	P	1	83	P	103	M	1	86	P	158	M	1	Homo sapiens CALIFp (CALIF) mRNA, complete cds.
202165_at	protein phosphatase 1, regulatory (inhibitor) subunit 2	PPP1R2	38	A	82	P	0	62	P	102	P	1	68	P	57	A	1	EST
202167_s_at	MMS19-like (MET18 homolog, S. cerevisiae)	MMS19L	121	P	174	P	1	159	P	146	M	1	134	P	163	A	1	Homo sapiens MMS19 (MET18 S. cerevisiae)-like (MMS19L), mRNA.
202168_at	TAF9 RNA polymerase II, TATA box binding protein (TBP)-associated factor, 32kDa	TAF9	138	P	126	A	1	161	P	60	P	3	108	P	84	P	1	Homo sapiens TATA box binding protein (TBP)-associated factor, RNA polymerase II, G, 32kD (TAF2G), mRNA.
202169_s_at	aminoadipate-semialdehyde dehydrogenase-phosphopantetheinyl transferase	AASDHPPT	205	P	92	A	2	124	P	90	P	1	96	P	81	P	1	Homo sapiens alpha-aminoadipic semialdehyde dehydrogenase-phosphopantetheinyl transferase mRNA, complete cds.
202172_at	Homo sapiens cDNA FLJ25295 fis, clone STM07531.		216	P	205	P	1	68	P	95	P	1	132	P	132	P	1	EST
202174_s_at	pericentriolar material 1	PCM1	107	P	98	A	1	106	P	117	A	1	240	P	126	A	2	Homo sapiens pericentriolar material 1 (PCM1), mRNA.
202176_at	excision repair cross-complementing rodent repair deficiency, complementation group 3 (xeroderma pigmentosum group B complementing)	ERCC3	106	P	79	A	1	124	P	117	A	1	112	P	96	A	1	Homo sapiens excision repair cross-complementing rodent repair deficiency, complementation group 3 (xeroderma pigmentosum group B complementing) (ERCC3), mRNA.
202178_at	protein kinase C, zeta	PRKCZ	148	A	107	A	1	133	A	82	A	2	131	A	32	A	4	Homo sapiens protein kinase C, zeta (PRKCZ), mRNA.
202179_at	bleomycin hydrolase	BLMH	7	A	20	A	0	67	A	14	A	5	19	A	30	A	1	Homo sapiens bleomycin hydrolase (BLMH), mRNA.
202180_s_at	major vault protein	MVP	171	P	151	A	1	84	M	52	A	2	105	P	142	A	1	Homo sapiens major vault protein (MVP), transcript variant 1, mRNA.
202182_at	GCN5 general control of amino-acid synthesis 5-like 2 (yeast)	GCN5L2	235	P	104	P	2	152	P	172	P	1	106	P	160	P	1	Homo sapiens GCN5 (general control of amino-acid synthesis, yeast, homolog)-like 2 (GCN5L2), mRNA.
202183_s_at	kinesin family member 22	KIF22	84	P	93	A	1	97	P	116	A	1	52	P	134	A	0	Homo sapiens kinesin-like 4 (KNSL4), mRNA.
202185_at	procollagen-lysine, 2-oxoglutarate 5-dioxygenase 3	PLOD3	168	P	207	P	1	184	P	282	P	1	229	P	327	P	1	Homo sapiens procollagen-lysine, 2-oxoglutarate 5-dioxygenase 3 (PLOD3), mRNA.
202187_s_at	protein phosphatase 2, regulatory subunit B (B56), alpha isoform	PPP2R5A	141	A	318	A	0	235	P	678	P	0	292	A	406	A	1	Homo sapiens protein phosphatase 2, regulatory subunit B (B56), alpha isoform (PPP2R5A), mRNA.
202191_s_at	growth arrest-specific 7	GAS7	75	P	472	P	0	78	P	257	P	0	817	P	433	P	2	EST
202193_at	LIM domain kinase 2	LIMK2	237	P	563	P	0	68	P	176	P	0	290	P	221	P	1	Homo sapiens LIM domain kinase 2 (LIMK2), transcript variant 2a, mRNA.
202196_s_at	dickkopf homolog 3 (Xenopus laevis)	DKK3	1	A	2	A	0	26	A	29	A	1	20	A	8	A	3	Homo sapiens dickkopf (Xenopus laevis) homolog 3 (DKK3), mRNA.
202197_at	myotubularin related protein 3	MTMR3	184	P	402	P	0	209	P	480	P	0	420	P	534	P	1	Homo sapiens myotubularin related protein 3 (MTMR3), mRNA.
202199_s_at	SFRS protein kinase 1	SRPK1	88	P	165	P	1	119	P	215	P	1	97	P	174	P	1	EST
202201_at	biliverdin reductase B (flavin reductase (NADPH))	BLVRB	682	P	1531	P	0	1075	P	3992	P	0	1047	P	3922	P	0	Homo sapiens biliverdin reductase B (flavin reductase (NADPH)) (BLVRB), mRNA.
202202_s_at	laminin, alpha 4	LAMA4	12	A	2	A	5	10	A	6	A	2	18	P	42	A	0	Homo sapiens laminin, alpha 4 (LAMA4), mRNA.
202203_s_at	autocrine motility factor receptor	AMFR	29	A	52	A	1	27	A	240	P	0	33	M	45	A	1	Homo sapiens autocrine motility factor receptor (AMFR), mRNA.
202205_at	vasodilator-stimulated phosphoprotein	VASP	159	P	453	P	0	90	P	354	P	0	50	P	384	P	0	Homo sapiens vasodilator-stimulated phosphoprotein (VASP), mRNA.
202207_at	ADP-ribosylation factor-like 7	ARL7	52	A	294	P	0	83	A	353	P	0	84	P	166	P	1	EST
202209_at	LSM3 homolog, U6 small nuclear RNA associated (S. cerevisiae)	LSM3	126	P	105	A	1	308	P	129	A	2	145	P	63	A	2	Homo sapiens Lsm3 protein (LSM3), mRNA.
202211_at	ADP-ribosylation factor GTPase activating protein 3	ARFGAP3	148	P	227	P	1	437	P	165	P	3	58	A	121	A	0	Homo sapiens, ADP-ribosylation factor GTPase activating protein 1, clone MGC:10272, mRNA, complete cds.
202212_at	pescadillo homolog 1, containing BRCT domain (zebrafish)	PES1	225	P	8	A	28	62	A	8	A	8	73	A	9	A	8	Homo sapiens pescadillo (zebrafish) homolog 1, containing BRCT domain (PES1), mRNA.
202213_s_at	cullin 4B	CUL4B	50	P	72	P	1	23	P	32	A	1	56	P	37	A	2	EST
202215_s_at	nuclear transcription factor Y, gamma	NFYC	100	P	140	P	1	48	P	93	P	1	117	P	125	P	1	Homo sapiens nuclear transcription factor Y, gamma (NFYC), mRNA.
202217_at	chromosome 21 open reading frame 33	C21orf33	508	P	322	P	2	566	P	253	A	2	440	P	425	P	1	Homo sapiens ES1 (zebrafish) protein, human homolog of (C21ORF33), mRNA.
202218_s_at	fatty acid desaturase 2	FADS2	10	A	18	A	1	10	A	48	A	0	3	A	10	A	0	Homo sapiens delta-6 fatty acid desaturase (FADSD6), mRNA.
202219_at	solute carrier family 6 (neurotransmitter transporter, creatine), member 8	SLC6A8	10	A	171	A	0	48	A	667	P	0	54	P	180	A	0	Homo sapiens solute carrier family 6 (neurotransmitter transporter, creatine), member 8 (SLC6A8), mRNA.
202221_s_at	E1A binding protein p300	EP300	42	A	112	P	0	15	A	42	A	0	38	P	49	A	1	EST
202222_s_at	desmin	DES	30	A	71	A	0	6	A	25	A	0	29	A	92	A	0	Homo sapiens desmin (DES), mRNA.
202223_at	integral membrane protein 1	ITM1	63	A	48	A	1	37	A	20	A	2	35	A	20	A	2	Homo sapiens integral membrane protein 1 (ITM1), mRNA.
202224_at	v-crk sarcoma virus CT10 oncogene homolog (avian)	CRK	68	P	61	A	1	168	P	94	A	2	170	P	147	P	1	EST
202227_s_at	bromodomain containing 8	BRD8	480	P	406	P	1	374	P	268	P	1	726	P	349	P	2	Homo sapiens thyroid hormone receptor coactivating protein (SMAP), mRNA.
202228_s_at	stromal cell derived factor receptor 1	SDFR1	432	P	563	P	1	315	P	397	P	1	618	P	462	P	1	Homo sapiens stromal cell derived factor receptor 1 (SDFR1), transcript variant alpha, mRNA.
202230_s_at	calcium homeostasis endoplasmic reticulum protein	CHERP	178	P	152	P	1	75	P	77	A	1	144	P	60	A	2	Homo sapiens protein with polyglutamine repeat; calcium (ca2+) homeostasis endoplasmic reticulum protein (ERPROT213-21), mRNA.
202232_s_at	dendritic cell protein	GA17	85	P	47	P	2	70	P	49	A	1	32	P	2	A	19	Homo sapiens dendritic cell protein (GA17), mRNA.
202233_s_at	ubiquinol-cytochrome c reductase hinge protein	UQCRH	382	P	500	P	1	1808	P	482	P	4	1082	P	558	P	2	Homo sapiens ubiquinol-cytochrome c reductase hinge protein (UQCRH), mRNA.
202236_s_at	solute carrier family 16 (monocarboxylic acid transporters), member 1	SLC16A1	31	A	23	A	1	24	A	27	A	1	4	A	24	A	0	Homo sapiens solute carrier family 16 (monocarboxylic acid transporters), member 1 (SLC16A1), mRNA.
202237_at	nicotinamide N-methyltransferase	NNMT	6	A	12	A	0	138	P	14	A	10	3	A	17	A	0	Homo sapiens nicotinamide N-methyltransferase (NNMT), mRNA.
202239_at	ADP-ribosyltransferase (NAD+; poly (ADP-ribose) polymerase)-like 1	ADPRTL1	90	A	317	A	0	187	A	320	A	1	301	P	306	A	1	Homo sapiens ADP-ribosyltransferase (NAD+; poly (ADP-ribose) polymerase)-like 1 (ADPRTL1), mRNA.
202240_at	polo-like kinase (Drosophila)	PLK	42	A	12	A	3	42	A	70	A	1	42	A	18	A	2	Homo sapiens polo (Drosophia)-like kinase (PLK), mRNA.
202241_at	phosphoprotein regulated by mitogenic pathways	C8FW	1945	P	1354	P	1	2088	P	507	P	4	862	P	942	P	1	Homo sapiens phosphoprotein regulated by mitogenic pathways (C8FW), mRNA.
202242_at	transmembrane 4 superfamily member 2	TM4SF2	36	A	19	A	2	35	A	77	A	0	4	A	29	A	0	Homo sapiens transmembrane 4 superfamily member 2 (TM4SF2), mRNA.
202244_at	proteasome (prosome, macropain) subunit, beta type, 4	PSMB4	1785	P	581	P	3	2272	P	721	P	3	1341	P	751	P	2	Homo sapiens proteasome (prosome, macropain) subunit, beta type, 4 (PSMB4), mRNA.
202245_at	lanosterol synthase (2,3-oxidosqualene-lanosterol cyclase)	LSS	129	A	224	A	1	124	A	148	A	1	109	A	138	A	1	EST
202246_s_at	cyclin-dependent kinase 4	CDK4	464	P	208	A	2	554	P	180	A	3	139	P	224	A	1	Homo sapiens cyclin-dependent kinase 4 (CDK4), mRNA.
202247_s_at	metastasis associated 1	MTA1	11	A	51	A	0	29	A	179	M	0	38	A	60	A	1	EST
202251_at	U4/U6-associated RNA splicing factor	HPRP3P	345	P	141	P	2	82	P	75	P	1	133	P	104	M	1	Homo sapiens U4U6-associated RNA splicing factor (HPRP3P), mRNA.
202252_at	RAB13, member RAS oncogene family	RAB13	1788	P	243	P	7	2346	P	458	P	5	424	P	186	P	2	Homo sapiens RAB13, member RAS oncogene family (RAB13), mRNA.
202253_s_at	dynamin 2	DNM2	35	A	42	A	1	48	A	6	A	7	75	A	22	A	3	Homo sapiens dynamin 2 (DNM2), mRNA.
202256_at	CD2 antigen (cytoplasmic tail) binding protein 2	CD2BP2	140	P	110	A	1	77	P	23	A	3	123	P	206	A	1	EST
202260_s_at	syntaxin binding protein 1	STXBP1	37	A	45	A	1	101	P	90	A	1	19	A	51	A	0	Homo sapiens syntaxin binding protein 1 (STXBP1), mRNA.
202261_at	transcription factor-like 1	TCFL1	457	P	206	P	2	268	P	217	P	1	111	P	285	P	0	Homo sapiens transcription factor-like 1 (TCFL1), mRNA.
202263_at	cytochrome b5 reductase 1 (B5R.1)	CYB5R1	136	P	111	A	1	110	A	219	P	1	120	P	124	A	1	Homo sapiens cytochrome b5 reductase 1 (B5R.1) (LOC51706), mRNA.
202264_s_at	translocase of outer mitochondrial membrane 40 homolog (yeast)	TOMM40	151	P	168	P	1	186	P	193	P	1	102	P	199	P	1	Homo sapiens DNA segment on chromosome 19 (unique) 1177 expressed sequence (D19S1177E), mRNA.
202265_at	B lymphoma Mo-MLV insertion region (mouse)	BMI1	512	P	163	P	3	164	P	123	P	1	125	P	106	P	1	Homo sapiens murine leukemia viral (bmi-1) oncogene homolog (BMI1), mRNA.
202267_at	laminin, gamma 2	LAMC2	154	P	93	A	2	74	A	120	A	1	127	P	50	A	3	Homo sapiens laminin, gamma 2 (nicein (100kD), kalinin (105kD), BM600 (100kD), Herlitz junctional epidermolysis bullosa)) (LAMC2), transcript variant 1, mRNA.
202268_s_at	amyloid beta precursor protein binding protein 1, 59kDa	APPBP1	114	P	84	M	1	176	P	77	A	2	103	P	4	A	23	Homo sapiens amyloid beta precursor protein-binding protein 1, 59kD (APPBP1), mRNA.
202270_at	guanylate binding protein 1, interferon-inducible, 67kDa	GBP1	419	P	1504	P	0	44	P	164	P	0	105	P	115	P	1	Homo sapiens guanylate binding protein 1, interferon-inducible, 67kD (GBP1), mRNA.
202273_at	platelet-derived growth factor receptor, beta polypeptide	PDGFRB	4	A	20	A	0	6	A	49	A	0	6	A	17	A	0	Homo sapiens platelet-derived growth factor receptor, beta polypeptide (PDGFRB), mRNA.
202274_at	actin, gamma 2, smooth muscle, enteric	ACTG2	7	A	24	A	0	10	A	20	A	0	16	A	113	A	0	Homo sapiens actin, gamma 2, smooth muscle, enteric (ACTG2), mRNA.
202276_at	Deleted in split-hand/split-foot 1 region	DSS1	457	P	211	P	2	692	P	192	P	4	241	P	208	P	1	Homo sapiens Deleted in split-handsplit-foot 1 region (DSS1), mRNA.
202277_at	Homo sapiens cDNA FLJ25478 fis, clone CBL03360.		179	P	174	P	1	140	P	102	P	1	194	P	179	P	1	EST
202282_at	hydroxyacyl-Coenzyme A dehydrogenase, type II	HADH2	1202	P	302	P	4	1187	P	289	P	4	761	P	300	P	3	Homo sapiens hydroxyacyl-Coenzyme A dehydrogenase, type II (HADH2), mRNA.
202283_at	serine (or cysteine) proteinase inhibitor, clade F (alpha-2 antiplasmin, pigment epithelium derived factor), member 1	SERPINF1	49	A	13	A	4	8	A	17	A	0	43	A	74	A	1	Homo sapiens serine (or cysteine) proteinase inhibitor, clade F (alpha-2 antiplasmin, pigment epithelium derived factor), member 1 (SERPINF1), mRNA.
202284_s_at	cyclin-dependent kinase inhibitor 1A (p21, Cip1)	CDKN1A	228	P	725	P	0	347	P	232	A	1	309	P	218	A	1	Homo sapiens cyclin-dependent kinase inhibitor 1A (p21, Cip1) (CDKN1A), mRNA.
202286_s_at	tumor-associated calcium signal transducer 2	TACSTD2	3502	P	12	A	292	1146	P	31	A	37	135	P	12	A	12	Human gastrointestinal tumor-associated antigen GA733-1 protein gene, complete cds, clone 05516
202289_s_at	transforming, acidic coiled-coil containing protein 2	TACC2	243	P	34	A	7	83	P	67	A	1	44	A	22	A	2	Homo sapiens transforming, acidic coiled-coil containing protein 2 (TACC2), mRNA.
202290_at	PDGFA associated protein 1	PDAP1	75	A	30	A	3	70	A	20	A	4	30	A	29	A	1	Homo sapiens PDGF associated protein (HASPP28), mRNA.
202292_x_at	lysophospholipase II	LYPLA2	197	P	432	P	0	319	P	464	P	1	333	P	526	P	1	Homo sapiens lysophospholipase II (LYPLA2), mRNA.
202294_at	stromal antigen 1	STAG1	83	P	94	A	1	103	P	117	A	1	98	P	86	A	1	EST
202295_s_at	cathepsin H	CTSH	477	P	855	P	1	688	P	466	P	1	1385	P	538	P	3	Homo sapiens cathepsin H (CTSH), mRNA.
202296_s_at	similar to S. cerevisiae RER1	RER1	223	P	334	P	1	340	P	371	P	1	347	P	435	P	1	Homo sapiens similar to S. cerevisiae RER1 (RER1), mRNA.
202298_at	NADH dehydrogenase (ubiquinone) 1 alpha subcomplex, 1, 7.5kDa	NDUFA1	757	P	618	P	1	2416	P	713	P	3	1284	P	598	P	2	Homo sapiens NADH dehydrogenase (ubiquinone) 1 alpha subcomplex, 1 (7.5kD, MWFE) (NDUFA1), nuclear gene encoding mitochondrial protein, mRNA.
202299_s_at	hepatitis B virus x interacting protein	HBXIP	405	P	276	P	1	787	P	619	P	1	256	P	331	P	1	Homo sapiens hepatitis B virus x-interacting protein (9.6kD) (XIP), mRNA.
202302_s_at	hypothetical protein FLJ11021 similar to splicing factor, arginine/serine-rich 4	FLJ11021	414	P	448	P	1	283	P	344	P	1	526	P	440	P	1	Homo sapiens hypothetical protein FLJ11021 similar to splicing factor, arginineserine-rich 4 (FLJ11021), mRNA.
202306_at	polymerase (RNA) II (DNA directed) polypeptide G	POLR2G	533	P	546	P	1	1276	P	388	A	3	560	P	544	P	1	Homo sapiens polymerase (RNA) II (DNA directed) polypeptide G (POLR2G), mRNA.
202308_at	sterol regulatory element binding transcription factor 1	SREBF1	73	A	91	A	1	26	A	71	A	0	104	A	36	A	3	Homo sapiens sterol regulatory element binding transcription factor 1 (SREBF1), mRNA.
202309_at	methylenetetrahydrofolate dehydrogenase (NADP+ dependent), methenyltetrahydrofolate cyclohydrolase, formyltetrahydrofolate synthetase	MTHFD1	405	P	198	A	2	302	P	190	A	2	210	P	145	A	1	Homo sapiens methylenetetrahydrofolate dehydrogenase (NADP+ dependent), methenyltetrahydrofolate cyclohydrolase, formyltetrahydrofolate synthetase (MTHFD1), mRNA.
202310_s_at	collagen, type I, alpha 1	COL1A1	2	A	7	A	0	2	A	10	A	0	1	A	3	A	0	Human proalpha 1 (I) chain of type I procollagen mRNA (partial).
202313_at	protein phosphatase 2 (formerly 2A), regulatory subunit B (PR 52), alpha isoform	PPP2R2A	156	P	288	P	1	140	P	219	P	1	192	P	178	P	1	Homo sapiens protein phosphatase 2 (formerly 2A), regulatory subunit B (PR 52), alpha isoform (PPP2R2A), mRNA.
202314_at	cytochrome P450, family 51, subfamily A, polypeptide 1	CYP51A1	111	P	37	A	3	59	P	31	A	2	25	P	4	A	6	Homo sapiens cytochrome P450, 51 (lanosterol 14-alpha-demethylase) (CYP51), mRNA.
202315_s_at	breakpoint cluster region	BCR	77	A	152	A	1	62	A	131	A	0	104	P	128	A	1	Homo sapiens breakpoint cluster region (BCR), transcript variant 1, mRNA.
202317_s_at	ubiquitination factor E4B (UFD2 homolog, yeast)	UBE4B	114	P	240	P	0	228	P	327	A	1	122	M	245	A	0	Homo sapiens ubiquitination factor E4B (homologous to yeast UFD2) (UBE4B), mRNA.
202322_s_at	geranylgeranyl diphosphate synthase 1	GGPS1	189	P	123	P	2	173	P	47	P	4	114	P	81	P	1	Homo sapiens geranylgeranyl diphosphate synthase 1 (GGPS1), mRNA.
202324_s_at	golgi complex associated protein 1, 60kDa	GOCAP1	656	P	170	P	4	415	P	134	P	3	155	P	128	P	1	Homo sapiens golgi resident protein GCP60 (GCP60), mRNA.
202325_s_at	ATP synthase, H+ transporting, mitochondrial F0 complex, subunit F6	ATP5J	671	P	310	P	2	875	P	428	P	2	484	P	369	P	1	Homo sapiens ATP synthase, H+ transporting, mitochondrial F0 complex, subunit F6 (ATP5J), mRNA.
202326_at	HLA-B associated transcript 8	BAT8	20	A	9	A	2	28	A	8	A	3	44	M	48	A	1	Homo sapiens ankyrin repeat-containing protein (G9A), mRNA.
202328_s_at	polycystic kidney disease 1 (autosomal dominant)	PKD1	19	A	85	A	0	53	A	72	A	1	70	A	23	A	3	Homo sapiens polycystic kidney disease 1 (autosomal dominant) (PKD1), mRNA.
202329_at	c-src tyrosine kinase	CSK	168	P	475	P	0	136	M	226	A	1	584	P	377	P	2	Homo sapiens c-src tyrosine kinase (CSK), mRNA.
202330_s_at	uracil-DNA glycosylase	UNG	235	P	59	A	4	79	P	9	A	9	47	P	39	A	1	Homo sapiens uracil-DNA glycosylase (UNG), mRNA.
202331_at	branched chain keto acid dehydrogenase E1, alpha polypeptide (maple syrup urine disease)	BCKDHA	207	P	124	A	2	159	P	174	P	1	305	P	149	A	2	Homo sapiens branched chain keto acid dehydrogenase E1, alpha polypeptide (maple syrup urine disease) (BCKDHA), mRNA.
202332_at	casein kinase 1, epsilon	CSNK1E	81	P	4	A	20	39	P	58	A	1	89	P	68	A	1	Homo sapiens casein kinase 1, epsilon (CSNK1E), mRNA.
202334_s_at	ubiquitin-conjugating enzyme E2B (RAD6 homolog)	UBE2B	165	P	416	P	0	142	P	395	P	0	155	P	351	P	0	EST
202336_s_at	peptidylglycine alpha-amidating monooxygenase	PAM	1015	P	117	A	9	34	A	67	A	1	76	P	140	A	1	Homo sapiens peptidylglycine alpha-amidating monooxygenase (PAM), mRNA.
202337_at	polyamine-modulated factor 1	PMF1	361	P	180	P	2	225	P	134	A	2	224	P	167	A	1	Homo sapiens polyamine-modulated factor 1 (PMF1), mRNA.
202338_at	thymidine kinase 1, soluble	TK1	257	P	88	A	3	116	A	31	A	4	51	A	22	A	2	Homo sapiens thymidine kinase 1, soluble (TK1), mRNA.
202345_s_at	fatty acid binding protein 5 (psoriasis-associated)	FABP5	50	P	23	A	2	73	M	43	A	2	108	P	20	A	5	Homo sapiens fatty acid binding protein 5 (psoriasis-associated) (FABP5), mRNA.
202346_at	huntingtin interacting protein 2	HIP2	43	P	40	P	1	49	P	53	P	1	54	P	63	P	1	Homo sapiens huntingtin interacting protein 2 (HIP2), mRNA.
202348_s_at	dystonia 1, torsion (autosomal dominant; torsin A)	DYT1	113	M	156	M	1	107	P	152	A	1	202	P	188	M	1	Homo sapiens, dystonia 1, torsion (autosomal dominant; torsin A), clone MGC:1558, mRNA, complete cds.
202350_s_at	matrilin 2	MATN2	18	P	22	A	1	5	A	4	A	1	19	A	24	A	1	Homo sapiens matrilin 2 (MATN2) precursor, transcript variant 1, mRNA.
202351_at	integrin, alpha V (vitronectin receptor, alpha polypeptide, antigen CD51)	ITGAV	198	P	55	A	4	204	P	49	A	4	98	P	102	A	1	EST
202352_s_at	proteasome (prosome, macropain) 26S subunit, non-ATPase, 12	PSMD12	181	P	108	A	2	212	P	178	A	1	188	P	169	P	1	EST
202355_s_at	general transcription factor IIF, polypeptide 1, 74kDa	GTF2F1	140	P	125	P	1	138	P	101	P	1	77	P	59	P	1	Homo sapiens, general transcription factor IIF, polypeptide 1 (74kD subunit), clone MGC:1732, mRNA, complete cds.
202357_s_at	B-factor, properdin	BF	1605	P	58	A	28	33	A	8	A	4	25	A	5	A	5	Homo sapiens B-factor, properdin (BF), mRNA.
202360_at	mastermind-like 1 (Drosophila)	MAML1	217	P	246	P	1	169	P	180	P	1	215	P	277	P	1	Homo sapiens mastermind (Drosophila), homolog of (MAML1), mRNA.
202361_at	SEC24 related gene family, member C (S. cerevisiae)	SEC24C	222	P	194	A	1	166	P	145	A	1	245	P	213	A	1	Homo sapiens SEC24 (S. cerevisiae) related gene family, member C (SEC24C), mRNA.
202362_at	RAP1A, member of RAS oncogene family	RAP1A	197	P	405	P	0	192	P	382	P	1	257	P	324	P	1	Homo sapiens RAP1A, member of RAS oncogene family (RAP1A), mRNA.
202363_at	sparc/osteonectin, cwcv and kazal-like domains proteoglycan (testican)	SPOCK	6	A	56	A	0	652	P	25	A	26	32	A	7	A	5	Homo sapiens testican-1 mRNA, complete cds.
202364_at	MAX interacting protein 1	MXI1	116	P	1315	P	0	503	P	4144	P	0	209	P	1665	P	0	Homo sapiens MAX-interacting protein 1 (MXI1), mRNA.
202365_at	hypothetical protein MGC5139	MGC5139	224	P	92	P	2	234	P	87	P	3	158	P	86	P	2	Homo sapiens, clone MGC:5139, mRNA, complete cds.
202369_s_at	TRAM-like protein	KIAA0057	78	A	174	P	0	41	A	134	P	0	112	P	127	P	1	Homo sapiens TRAM-like protein (KIAA0057), mRNA.
202370_s_at	core-binding factor, beta subunit	CBFB	232	P	382	P	1	341	P	410	P	1	541	P	303	P	2	Homo sapiens core-binding factor, beta subunit (CBFB), transcript variant 2, mRNA.
202373_s_at	rab3 GTPase-activating protein, non-catalytic subunit (150kD)	RAB3-GAP150	138	P	160	A	1	265	M	217	A	1	220	M	272	A	1	Homo sapiens rGAP-iso mRNA, complete cds.
202375_at	SEC24 related gene family, member D (S. cerevisiae)	SEC24D	29	P	41	P	1	45	P	10	A	4	24	P	5	A	5	Homo sapiens SEC24 (S. cerevisiae) related gene family, member D (SEC24D), mRNA.
202376_at	serine (or cysteine) proteinase inhibitor, clade A (alpha-1 antiproteinase, antitrypsin), member 3	SERPINA3	2252	P	31	A	73	3317	P	71	A	47	40	A	110	A	0	Homo sapiens serine (or cysteine) proteinase inhibitor, clade A (alpha-1 antiproteinase, antitrypsin), member 3 (SERPINA3), mRNA.
202377_at	leptin receptor gene-related protein	HSOBRGRP	166	P	347	P	0	150	P	216	P	1	314	P	217	P	1	EST
202381_at	a disintegrin and metalloproteinase domain 9 (meltrin gamma)	ADAM9	123	P	36	A	3	763	P	59	P	13	138	P	132	P	1	Homo sapiens a disintegrin and metalloproteinase domain 9 (meltrin gamma) (ADAM9), mRNA.
202382_s_at	glucosamine-6-phosphate isomerase	GNPI	191	P	85	A	2	146	P	62	A	2	167	P	39	A	4	Homo sapiens glucosamine-6-phosphate isomerase (GNPI), mRNA.
202383_at	Smcx homolog, X chromosome (mouse)	SMCX	98	A	77	A	1	110	A	151	A	1	52	A	185	P	0	Homo sapiens SMC (mouse) homolog, X chromosome (SMCX), mRNA.
202384_s_at	Treacher Collins-Franceschetti syndrome 1	TCOF1	40	P	73	A	1	52	P	35	A	2	77	P	45	A	2	EST
202388_at	regulator of G-protein signalling 2, 24kDa	RGS2	220	P	4031	P	0	692	P	3865	P	0	3500	P	4915	P	1	Homo sapiens regulator of G-protein signalling 2, 24kD (RGS2), mRNA.
202390_s_at	huntingtin (Huntington disease)	HD	44	A	57	A	1	62	A	117	A	1	149	P	181	A	1	Homo sapiens huntingtin (Huntington disease) (HD), mRNA.
202391_at	brain abundant, membrane attached signal protein 1	BASP1	327	P	2956	P	0	1036	P	2203	P	0	1656	P	2848	P	1	Homo sapiens brain acid-soluble protein 1 (BASP1), mRNA.
202392_s_at	phosphatidylserine decarboxylase	PISD	88	P	206	P	0	72	A	233	P	0	200	P	315	P	1	Homo sapiens phosphatidylserine decarboxylase (PISD), mRNA.
202393_s_at	TGFB inducible early growth response	TIEG	253	P	327	P	1	192	P	152	P	1	337	P	170	P	2	Homo sapiens TGFB inducible early growth response (TIEG), mRNA.
202395_at	N-ethylmaleimide-sensitive factor	NSF	568	P	184	A	3	651	P	39	A	17	410	P	243	A	2	Homo sapiens N-ethylmaleimide-sensitive factor (NSF), mRNA.
202396_at	transcription elongation regulator 1 (CA150)	TCERG1	221	P	84	P	3	89	P	57	A	2	129	P	40	P	3	Homo sapiens transcription factor CA150 (CA150), mRNA.
202397_at	nuclear transport factor 2	NUTF2	123	P	160	P	1	122	P	180	P	1	80	P	197	P	0	Homo sapiens nuclear transport factor 2 (placental protein 15) (PP15), mRNA.
202399_s_at	adaptor-related protein complex 3, sigma 2 subunit	AP3S2	653	P	407	P	2	332	P	272	A	1	285	P	288	A	1	Homo sapiens adaptor-related protein complex 3, sigma 2 subunit (AP3S2), mRNA.
202401_s_at	serum response factor (c-fos serum response element-binding transcription factor)	SRF	156	P	50	A	3	176	P	62	A	3	129	P	17	A	7	Homo sapiens serum response factor (c-fos serum response element-binding transcription factor) (SRF), mRNA.
202403_s_at	collagen, type I, alpha 2	COL1A2	24	A	31	A	1	25	A	16	A	2	30	A	31	A	1	EST
202405_at	TIA1 cytotoxic granule-associated RNA binding protein-like 1	TIAL1	50	P	72	P	1	40	P	91	P	0	56	P	58	A	1	EST
202409_at	Homo sapiens, clone MGC:52263 IMAGE:4123447, mRNA, complete cds		35	A	42	A	1	16	A	82	A	0	10	A	57	A	0	Human DNA for insulin-like growth factor II (IGF-2); exon 7 and additional ORF
202411_at	interferon, alpha-inducible protein 27	IFI27	782	P	1593	P	0	168	P	1069	P	0	70	A	175	M	0	Homo sapiens interferon, alpha-inducible protein 27 (IFI27), mRNA.
202413_s_at	ubiquitin specific protease 1	USP1	183	P	139	P	1	180	P	150	P	1	333	P	132	P	3	Homo sapiens ubiquitin specific protease 1 (USP1), mRNA.
202414_at	excision repair cross-complementing rodent repair deficiency, complementation group 5 (xeroderma pigmentosum, complementation group G (Cockayne syndrome))	ERCC5	134	P	119	P	1	44	A	116	P	0	242	P	205	P	1	Homo sapiens excision repair cross-complementing rodent repair deficiency, complementation group 5 (xeroderma pigmentosum, complementation group G (Cockayne syndrome)) (ERCC5), mRNA.
202415_s_at	hsp70-interacting protein	HSPBP1	139	M	9	A	15	40	A	18	A	2	63	A	56	A	1	Homo sapiens hsp70-interacting protein (HSPBP1), mRNA.
202416_at	DnaJ (Hsp40) homolog, subfamily C, member 7	DNAJC7	218	P	328	A	1	82	P	454	A	0	211	P	606	P	0	Homo sapiens tetratricopeptide repeat domain 2 (TTC2), mRNA.
202417_at	Kelch-like ECH-associated protein 1	KEAP1	182	A	52	A	3	175	A	19	A	9	82	A	31	A	3	Homo sapiens Kelch-like ECH-associated protein 1 (KIAA0132), mRNA.
202418_at	Yip1p-interacting factor	YIF1P	445	P	128	A	3	351	P	120	A	3	171	P	181	A	1	Homo sapiens putative transmembrane protein; homolog of yeast Golgi membrane protein Yif1p (Yip1p-interacting factor) (54TM), mRNA.
202419_at	follicular lymphoma variant translocation 1	FVT1	133	P	112	A	1	150	P	91	A	2	195	P	193	A	1	Homo sapiens follicular lymphoma variant translocation 1 (FVT1), mRNA.
202420_s_at	DEAD/H (Asp-Glu-Ala-Asp/His) box polypeptide 9 (RNA helicase A, nuclear DNA helicase II; leukophysin)	DDX9	403	P	162	P	2	329	P	395	P	1	318	P	351	P	1	Homo sapiens DEADH (Asp-Glu-Ala-AspHis) box polypeptide 9 (RNA helicase A, nuclear DNA helicase II; leukophysin) (DDX9), transcript variant 1, mRNA.
202421_at	immunoglobulin superfamily, member 3	IGSF3	335	P	92	A	4	103	P	116	A	1	35	A	100	A	0	Homo sapiens mRNA for KIAA0466 protein, partial cds.
202422_s_at	fatty-acid-Coenzyme A ligase, long-chain 4	FACL4	15	P	64	P	0	10	A	16	A	1	40	P	26	A	1	Homo sapiens fatty-acid-Coenzyme A ligase, long-chain 4 (FACL4), transcript variant 2, mRNA.
202423_at	runt-related transcription factor binding protein 2	RUNXBP2	305	P	481	P	1	224	P	344	P	1	344	P	406	P	1	Homo sapiens zinc finger protein 220 (ZNF220), mRNA.
202424_at	mitogen-activated protein kinase kinase 2	MAP2K2	249	A	262	P	1	156	P	99	P	2	104	P	158	A	1	Homo sapiens mitogen-activated protein kinase kinase 2 (MAP2K2), mRNA.
202428_x_at	diazepam binding inhibitor (GABA receptor modulator, acyl-Coenzyme A binding protein)	DBI	1418	P	359	P	4	1023	P	314	P	3	788	P	239	P	3	Homo sapiens diazepam binding inhibitor (GABA receptor modulator, acyl-Coenzyme A binding protein) (DBI), mRNA.
202429_s_at	protein phosphatase 3 (formerly 2B), catalytic subunit, alpha isoform (calcineurin A alpha)	PPP3CA	86	P	137	P	1	1116	P	129	P	9	113	P	152	P	1	Homo sapiens mRNA; cDNA DKFZp761L0516 (from clone DKFZp761L0516); complete cds.
202431_s_at	v-myc myelocytomatosis viral oncogene homolog (avian)	MYC	247	P	33	A	7	84	A	40	A	2	31	A	25	A	1	Homo sapiens v-myc avian myelocytomatosis viral oncogene homolog (MYC), mRNA.
202432_at	protein phosphatase 3 (formerly 2B), catalytic subunit, beta isoform (calcineurin A beta)	PPP3CB	90	P	225	P	0	146	P	264	P	1	496	P	214	P	2	Homo sapiens protein phosphatase 3 (formerly 2B), catalytic subunit, beta isoform (calcineurin A beta) (PPP3CB), mRNA.
202433_at	UDP-galactose transporter related	UGTREL1	277	P	143	A	2	225	P	170	A	1	193	P	158	M	1	Homo sapiens UDP-galactose transporter related (UGTREL1), mRNA.
202437_s_at	cytochrome P450, family 1, subfamily B, polypeptide 1	CYP1B1	25	A	131	P	0	44	P	84	P	1	275	P	169	P	2	Homo sapiens cytochrome P450, subfamily I (dioxin-inducible), polypeptide 1 (glaucoma 3, primary infantile) (CYP1B1), mRNA.
202439_s_at	iduronate 2-sulfatase (Hunter syndrome)	IDS	50	A	155	P	0	46	A	177	P	0	118	P	308	P	0	Homo sapiens iduronate 2-sulfatase (Hunter syndrome) (IDS), transcript variant 1, mRNA.
202440_s_at	suppression of tumorigenicity 5	ST5	119	P	14	A	9	36	A	30	A	1	22	A	24	A	1	Homo sapiens suppression of tumorigenicity 5 (ST5), mRNA.
202441_at	similar to Caenorhabditis elegans protein C42C1.9	KEO4	518	P	212	A	2	192	M	227	A	1	211	P	226	A	1	EST
202442_at	adaptor-related protein complex 3, sigma 1 subunit	AP3S1	423	P	626	P	1	560	P	737	P	1	588	P	433	P	1	Homo sapiens adaptor-related protein complex 3, sigma 1 subunit (AP3S1), mRNA.
202446_s_at	phospholipid scramblase 1	PLSCR1	853	P	1733	P	0	247	P	442	P	1	580	P	544	P	1	EST
202447_at	2,4-dienoyl CoA reductase 1, mitochondrial	DECR1	716	P	589	P	1	592	P	646	P	1	788	P	451	P	2	Homo sapiens 2,4-dienoyl CoA reductase 1, mitochondrial (DECR1), nuclear gene encoding mitochondrial protein, mRNA.
202448_s_at	ZYG homolog	ZYG	47	P	100	P	0	93	A	106	P	1	39	P	143	A	0	EST
202449_s_at	retinoid X receptor, alpha	RXRA	542	P	490	P	1	191	P	722	P	0	416	P	885	P	0	Homo sapiens retinoid X receptor, alpha (RXRA), mRNA.
202450_s_at	cathepsin K (pycnodysostosis)	CTSK	88	P	185	P	0	84	P	154	A	1	229	P	144	A	2	Homo sapiens cathepsin K (pycnodysostosis) (CTSK), mRNA.
202451_at	general transcription factor IIH, polypeptide 1, 62kDa	GTF2H1	241	P	155	P	2	174	P	90	P	2	168	P	100	P	2	Homo sapiens, general transcription factor IIH, polypeptide 1 (62kD subunit), clone MGC:8323, mRNA, complete cds.
202454_s_at	v-erb-b2 erythroblastic leukemia viral oncogene homolog 3 (avian)	ERBB3	134	P	12	A	11	116	P	31	A	4	50	P	22	A	2	Homo sapiens v-erb-b2 avian erythroblastic leukemia viral oncogene homolog 3 (ERBB3), mRNA.
202455_at	histone deacetylase 5	HDAC5	50	A	95	A	1	67	A	117	A	1	171	A	82	A	2	Homo sapiens histone deacetylase 5 (HDAC5), mRNA.
202458_at	protease, serine, 23	SPUVE	133	P	159	A	1	88	P	136	A	1	123	P	69	A	2	Homo sapiens protease, serine, 23 (SPUVE), mRNA.
202461_at	eukaryotic translation initiation factor 2B, subunit 2 beta, 39kDa	EIF2B2	191	P	139	A	1	246	P	193	P	1	157	P	160	P	1	Homo sapiens eukaryotic translation initiation factor 2B, subunit 2 (beta, 39kD) (EIF2B2), mRNA.
202464_s_at	6-phosphofructo-2-kinase/fructose-2,6-biphosphatase 3	PFKFB3	245	P	822	P	0	106	A	406	P	0	380	P	395	P	1	Homo sapiens 6-phosphofructo-2-kinasefructose-2,6-biphosphatase 3 (PFKFB3), mRNA.
202465_at	procollagen C-endopeptidase enhancer	PCOLCE	14	A	8	A	2	8	A	17	A	0	9	A	15	A	1	Homo sapiens procollagen C-endopeptidase enhancer (PCOLCE), mRNA.
202466_at	polymerase (DNA directed) sigma	POLS	403	P	408	P	1	312	P	311	P	1	422	P	336	P	1	Homo sapiens topoisomerase-related function protein 4-1 (TRF4), mRNA.
202467_s_at	thyroid receptor interacting protein 15	TRIP15	684	P	339	P	2	667	P	362	P	2	796	P	355	P	2	Homo sapiens thyroid receptor interacting protein 15 (TRIP15), mRNA.
202468_s_at	catenin (cadherin-associated protein), alpha-like 1	CTNNAL1	24	A	110	P	0	244	P	345	P	1	56	P	265	P	0	Homo sapiens catenin (cadherin-associated protein), alpha-like 1 (CTNNAL1), mRNA.
202469_s_at	Homo sapiens cDNA FLJ36446 fis, clone THYMU2013051.		283	P	85	P	3	214	P	102	P	2	272	P	111	P	2	EST
202471_s_at	isocitrate dehydrogenase 3 (NAD+) gamma	IDH3G	101	P	143	A	1	107	P	166	A	1	214	P	141	A	2	Homo sapiens isocitrate dehydrogenase 3 (NAD+) gamma (IDH3G), mRNA.
202472_at	mannose phosphate isomerase	MPI	51	A	112	A	0	82	A	13	A	6	55	A	28	A	2	Homo sapiens mannose phosphate isomerase (MPI), mRNA.
202474_s_at	host cell factor C1 (VP16-accessory protein)	HCFC1	88	P	214	P	0	99	P	249	P	0	85	P	191	P	0	Homo sapiens host cell factor C1 (VP16-accessory protein) (HCFC1), mRNA.
202475_at	seven transmembrane domain protein	NIFIE14	972	P	233	P	4	682	P	149	P	5	409	P	107	P	4	Homo sapiens seven transmembrane domain protein (NIFIE14), mRNA.
202477_s_at	tubulin, gamma complex associated protein 2	TUBGCP2	70	P	88	A	1	63	A	60	A	1	181	P	122	A	1	Homo sapiens gamma-tubulin complex protein 2 (GCP2), mRNA.
202481_at	short-chain dehydrogenase/reductase 1	SDR1	93	A	138	A	1	232	P	216	A	1	66	M	63	A	1	Homo sapiens short-chain dehydrogenasereductase 1 (SDR1), mRNA.
202483_s_at	RAN binding protein 1	RANBP1	148	P	146	A	1	528	P	175	A	3	127	P	183	A	1	Homo sapiens RAN binding protein 1 (RANBP1), mRNA.
202484_s_at	methyl-CpG binding domain protein 2	MBD2	222	P	388	P	1	282	P	173	P	2	617	P	275	P	2	Homo sapiens methyl-CpG binding protein MBD2 (MBD2) mRNA, complete cds.
202486_at	AFG3 ATPase family gene 3-like 2 (yeast)	AFG3L2	183	P	76	A	2	230	P	166	A	1	209	P	90	A	2	Homo sapiens AFG3 (ATPase family gene 3, yeast)-like 2 (AFG3L2), nuclear gene encoding mitochondrial protein, mRNA.
202488_s_at	FXYD domain containing ion transport regulator 3	FXYD3	738	P	335	P	2	393	P	430	P	1	178	P	414	P	0	Homo sapiens FXYD domain-containing ion transport regulator 3 (FXYD3), transcript variant 1, mRNA.
202491_s_at	inhibitor of kappa light polypeptide gene enhancer in B-cells, kinase complex-associated protein	IKBKAP	226	P	144	A	2	151	P	118	P	1	107	P	144	M	1	Homo sapiens inhibitor of kappa light polypeptide gene enhancer in B-cells, kinase complex-associated protein (IKBKAP), mRNA.
202493_x_at	chorionic somatomammotropin hormone 1 (placental lactogen)	CSH1	3	A	3	A	1	2	A	3	A	1	2	A	3	A	0	Homo sapiens chorionic somatomammotropin hormone 1 (placental lactogen) (CSH1), transcript variant 1, mRNA.
202495_at	tubulin-specific chaperone c	TBCC	227	P	162	P	1	89	P	78	P	1	186	P	152	P	1	Homo sapiens tubulin-specific chaperone c (TBCC), mRNA.
202496_at	autoantigen	RCD-8	40	A	25	A	2	26	A	63	A	0	108	P	40	A	3	Homo sapiens autoantigen (RCD-8), mRNA.
202499_s_at	solute carrier family 2 (facilitated glucose transporter), member 3	SLC2A3	62	P	1370	P	0	98	P	981	P	0	526	P	784	P	1	Homo sapiens solute carrier family 2 (facilitated glucose transporter), member 3 (SLC2A3), mRNA.
202500_at	DnaJ (Hsp40) homolog, subfamily B, member 2	DNAJB2	283	P	199	P	1	202	P	188	P	1	16	A	220	M	0	Homo sapiens heat shock protein, neuronal DNAJ-like 1 (HSJ1), mRNA.
202501_at	microtubule-associated protein, RP/EB family, member 2	MAPRE2	47	P	313	P	0	135	P	358	P	0	177	P	210	P	1	Homo sapiens microtubule-associated protein, RPEB family, member 2 (MAPRE2), mRNA.
202502_at	acyl-Coenzyme A dehydrogenase, C-4 to C-12 straight chain	ACADM	128	P	73	P	2	58	P	49	P	1	66	P	39	P	2	Homo sapiens acyl-Coenzyme A dehydrogenase, C-4 to C-12 straight chain (ACADM), nuclear gene encoding mitochondrial protein, mRNA.
202504_at	tripartite motif-containing 29	TRIM29	94	A	41	A	2	14	A	7	A	2	42	A	57	A	1	Homo sapiens ataxia-telangiectasia group D-associated protein (ATDC), mRNA.
202505_at	small nuclear ribonucleoprotein polypeptide B''	SNRPB2	463	P	320	P	1	318	P	358	A	1	377	P	338	M	1	Homo sapiens small nuclear ribonucleoprotein polypeptide B (SNRPB2), mRNA.
202506_at	sperm specific antigen 2	SSFA2	90	P	124	P	1	33	P	77	P	0	92	P	109	P	1	Homo sapiens sperm specific antigen 2 (SSFA2), mRNA.
202508_s_at	synaptosomal-associated protein, 25kDa	SNAP25	17	A	21	A	1	25	A	41	A	1	12	A	6	A	2	Homo sapiens synaptosomal-associated protein, 25kD (SNAP25), mRNA.
202510_s_at	tumor necrosis factor, alpha-induced protein 2	TNFAIP2	654	P	715	P	1	178	P	775	P	0	828	P	495	P	2	Homo sapiens tumor necrosis factor, alpha-induced protein 2 (TNFAIP2), mRNA.
202513_s_at	protein phosphatase 2, regulatory subunit B (B56), delta isoform	PPP2R5D	216	A	301	A	1	242	P	565	A	0	211	P	625	A	0	Homo sapiens protein phosphatase 2, regulatory subunit B (B56), delta isoform (PPP2R5D), mRNA.
202515_at	Homo sapiens, clone IMAGE:4798592, mRNA		184	P	201	P	1	131	P	196	P	1	169	P	165	P	1	EST
202517_at	collapsin response mediator protein 1	CRMP1	12	A	123	A	0	39	A	62	A	1	31	A	90	A	0	Homo sapiens collapsin response mediator protein 1 (CRMP1), mRNA.
202518_at	B-cell CLL/lymphoma 7B	BCL7B	108	P	106	P	1	76	P	49	A	2	96	P	39	A	2	Homo sapiens B-cell CLLlymphoma 7B (BCL7B), mRNA.
202520_s_at	mutL homolog 1, colon cancer, nonpolyposis type 2 (E. coli)	MLH1	368	P	207	A	2	336	P	269	A	1	254	P	271	A	1	Homo sapiens mutL (E. coli) homolog 1 (colon cancer, nonpolyposis type 2) (MLH1), mRNA.
202521_at	CCCTC-binding factor (zinc finger protein)	CTCF	176	P	159	P	1	188	P	183	M	1	195	P	167	A	1	Homo sapiens CCCTC-binding factor (zinc finger protein) (CTCF), mRNA.
202522_at	phosphotidylinositol transfer protein, beta	PITPNB	550	P	474	P	1	634	P	451	P	1	525	P	387	A	1	Human DNA sequence from clone RP3-353E16 on chromosome 22q11.22-12.3 Contains the 5 part of the MN1 gene for meningioma (disrupted in balanced translocation) 1, the PITPNB gene for phosphatidylinositol transfer protein beta, ESTs, STSs, GSSs and ...
202525_at	protease, serine, 8 (prostasin)	PRSS8	106	P	76	A	1	108	A	135	A	1	64	P	67	A	1	Homo sapiens protease, serine, 8 (prostasin) (PRSS8), mRNA.
202527_s_at	MAD, mothers against decapentaplegic homolog 4 (Drosophila)	MADH4	12	A	30	P	0	22	P	38	P	1	19	P	20	A	1	Homo sapiens MAD (mothers against decapentaplegic, Drosophila) homolog 4 (MADH4), mRNA.
202528_at	galactose-4-epimerase, UDP-	GALE	75	P	12	A	6	54	A	14	A	4	39	A	4	A	10	Homo sapiens galactose-4-epimerase, UDP- (GALE), mRNA.
202529_at	phosphoribosyl pyrophosphate synthetase-associated protein 1	PRPSAP1	295	P	211	P	1	182	P	224	P	1	231	P	248	P	1	Homo sapiens phosphoribosyl pyrophosphate synthetase-associated protein 1 (PRPSAP1), mRNA.
202530_at	mitogen-activated protein kinase 14	MAPK14	141	P	485	P	0	100	P	472	P	0	424	P	726	P	1	Homo sapiens mitogen-activated protein kinase 14 (MAPK14), mRNA.
202531_at	interferon regulatory factor 1	IRF1	380	P	818	P	0	388	P	533	P	1	225	P	492	A	0	Homo sapiens interferon regulatory factor 1 (IRF1), mRNA.
202532_s_at	dihydrofolate reductase	DHFR	88	P	75	M	1	54	A	100	A	1	56	P	71	A	1	Homo sapiens, dihydrofolate reductase, clone MGC:857, mRNA, complete cds.
202535_at	Fas (TNFRSF6)-associated via death domain	FADD	138	P	88	A	2	61	A	66	A	1	162	P	140	A	1	Homo sapiens Fas (TNFRSF6)-associated via death domain (FADD), mRNA.
202539_s_at	3-hydroxy-3-methylglutaryl-Coenzyme A reductase	HMGCR	74	P	36	A	2	76	P	75	A	1	77	P	82	A	1	EST
202542_s_at	small inducible cytokine subfamily E, member 1 (endothelial monocyte-activating)	SCYE1	160	P	189	P	1	186	P	265	P	1	244	P	161	P	2	Homo sapiens small inducible cytokine subfamily E, member 1 (endothelial monocyte-activating) (SCYE1), mRNA.
202544_at	glia maturation factor, beta	GMFB	408	P	326	P	1	353	P	352	P	1	415	P	509	P	1	Homo sapiens glia maturation factor, beta (GMFB), mRNA.
202545_at	protein kinase C, delta	PRKCD	41	A	80	A	1	12	A	15	A	1	235	P	23	A	10	Homo sapiens protein kinase C, delta (PRKCD), mRNA.
202546_at	vesicle-associated membrane protein 8 (endobrevin)	VAMP8	212	P	86	P	2	138	P	117	A	1	202	P	119	P	2	Homo sapiens vesicle-associated membrane protein 8 (endobrevin) (VAMP8), mRNA.
202548_s_at	Rho guanine nucleotide exchange factor (GEF) 7	ARHGEF7	213	P	156	A	1	100	M	130	A	1	149	P	170	A	1	Homo sapiens PAK-interacting exchange factor beta (P85SPR), mRNA.
202550_s_at	VAMP (vesicle-associated membrane protein)-associated protein B and C	VAPB	269	P	232	P	1	299	P	150	A	2	370	P	203	A	2	Homo sapiens VAMP (vesicle-associated membrane protein)-associated protein B and C (VAPB), mRNA.
202551_s_at	cysteine-rich motor neuron 1	CRIM1	22	A	2	A	14	12	A	5	A	2	9	A	3	A	3	EST
202554_s_at	glutathione S-transferase M3 (brain)	GSTM3	54	P	63	A	1	135	P	85	A	2	49	A	64	A	1	EST
202555_s_at	myosin, light polypeptide kinase	MYLK	34	A	210	M	0	31	A	118	A	0	115	P	78	A	1	Homo sapiens myosin, light polypeptide kinase (MYLK), mRNA.
202556_s_at	microspherule protein 1	MCRS1	157	P	164	A	1	141	P	174	A	1	124	A	161	A	1	Homo sapiens microspherule protein 1 (MCRS1), mRNA.
202557_at	stress 70 protein chaperone, microsome-associated, 60kDa	STCH	26	P	17	A	1	22	A	2	A	10	14	P	37	A	0	EST
202561_at	tankyrase, TRF1-interacting ankyrin-related ADP-ribose polymerase	TNKS	59	P	88	P	1	107	P	83	A	1	59	P	82	P	1	Homo sapiens clone 24585 mRNA sequence.
202562_s_at	chromosome 14 open reading frame 1	C14orf1	287	P	32	A	9	146	P	44	A	3	28	A	8	A	3	Homo sapiens mRNA; cDNA DKFZp564H0664 (from clone DKFZp564H0664); complete cds.
202564_x_at	ADP-ribosylation factor-like 2	ARL2	182	M	52	A	4	213	P	140	A	2	112	M	156	A	1	Homo sapiens ADP-ribosylation factor-like 2 (ARL2), mRNA.
202565_s_at	supervillin	SVIL	177	P	250	P	1	92	P	89	P	1	289	P	229	P	1	Homo sapiens supervillin (SVIL), transcript variant 1, mRNA.
202567_at	small nuclear ribonucleoprotein D3 polypeptide 18kDa	SNRPD3	1199	P	256	P	5	1870	P	283	A	7	685	P	201	A	3	Homo sapiens small nuclear ribonucleoprotein D3 polypeptide (18kD) (SNRPD3), mRNA.
202569_s_at	MAP/microtubule affinity-regulating kinase 3	MARK3	94	P	115	P	1	32	P	55	A	1	49	P	61	P	1	Homo sapiens MAPmicrotubule affinity-regulating kinase 3 (MARK3), mRNA.
202573_at	casein kinase 1, gamma 2	CSNK1G2	202	P	688	P	0	273	P	385	P	1	352	P	450	P	1	EST
202575_at	cellular retinoic acid binding protein 2	CRABP2	4338	P	8	A	542	82	A	82	A	1	7	A	100	A	0	Homo sapiens cellular retinoic acid-binding protein 2 (CRABP2), mRNA.
202581_at	heat shock 70kDa protein 1B	HSPA1B	567	P	135	P	4	173	P	58	A	3	127	P	68	A	2	Homo sapiens heat shock 70kD protein 1B (HSPA1B), mRNA.
202582_s_at	RAN binding protein 9	RANBP9	1009	P	715	P	1	460	P	439	P	1	309	P	338	P	1	Homo sapiens RANBPM mRNA, complete cds.
202584_at	nuclear transcription factor, X-box binding 1	NFX1	72	M	115	A	1	96	A	102	A	1	66	A	42	A	2	EST
202586_at	polymerase (RNA) II (DNA directed) polypeptide L, 7.6kDa	POLR2L	17	A	4	A	4	8	A	6	A	1	14	A	5	A	3	EST
202587_s_at	adenylate kinase 1	AK1	145	A	107	P	1	91	P	318	P	0	50	A	138	P	0	Homo sapiens, adenylate kinase 1, clone MGC:1808, mRNA, complete cds.
202589_at	thymidylate synthetase	TYMS	582	P	167	P	3	449	P	190	P	2	224	P	127	P	2	Homo sapiens thymidylate synthetase (TYMS), mRNA.
202590_s_at	pyruvate dehydrogenase kinase, isoenzyme 2	PDK2	54	P	44	A	1	7	A	185	A	0	50	A	25	A	2	EST
202591_s_at	single-stranded DNA binding protein	SSBP1	406	P	127	P	3	550	P	66	A	8	247	P	83	P	3	Homo sapiens single-stranded DNA-binding protein (SSBP), mRNA.
202592_at	GCN5 general control of amino-acid synthesis 5-like 1 (yeast)	GCN5L1	251	P	355	P	1	301	A	349	A	1	415	P	303	A	1	Homo sapiens GCN5 (general control of amino-acid synthesis, yeast, homolog)-like 1 (GCN5L1), mRNA.
202593_s_at	membrane interacting protein of RGS16	MIR16	30	A	50	A	1	68	M	85	A	1	29	A	58	M	1	Homo sapiens membrane interacting protein of RGS16 (MIR16), mRNA.
202596_at	endosulfine alpha	ENSA	1427	P	1010	P	1	1983	P	956	P	2	768	P	788	P	1	Homo sapiens, endosulfine alpha, clone MGC:8394, mRNA, complete cds.
202597_at	ESTs, Weakly similar to YYY1_HUMAN Very very hypothetical protein RMSA-1 [H.sapiens]		756	P	89	A	9	1254	P	118	A	11	231	P	85	A	3	EST
202598_at	S100 calcium binding protein A13	S100A13	709	P	79	A	9	244	P	40	A	6	87	P	25	A	4	Homo sapiens S100 calcium-binding protein A13 (S100A13), mRNA.
202600_s_at	nuclear receptor interacting protein 1	NRIP1	128	P	116	M	1	39	P	14	A	3	0	A	18	A	0	EST
202602_s_at	HIV TAT specific factor 1	HTATSF1	368	P	128	P	3	169	P	106	P	2	220	P	139	P	2	Homo sapiens HIV TAT specific factor 1 (HTATSF1), mRNA.
202603_at	a disintegrin and metalloproteinase domain 10	ADAM10	623	P	535	P	1	356	P	492	P	1	917	P	781	P	1	EST
202605_at	glucuronidase, beta	GUSB	560	P	314	P	2	437	P	212	A	2	1413	P	234	M	6	Homo sapiens glucuronidase, beta (GUSB), mRNA.
202606_s_at	tousled-like kinase 1	TLK1	51	P	46	P	1	76	P	71	P	1	70	P	91	P	1	Homo sapiens tousled-like kinase 1 (TLK1), mRNA.
202607_at	N-deacetylase/N-sulfotransferase (heparan glucosaminyl) 1	NDST1	50	M	76	P	1	52	A	122	P	0	38	A	135	M	0	EST
202609_at	epidermal growth factor receptor pathway substrate 8	EPS8	141	P	3	A	54	36	P	47	A	1	41	P	6	A	7	Homo sapiens epidermal growth factor receptor pathway substrate 8 (EPS8), mRNA.
202611_s_at	cofactor required for Sp1 transcriptional activation, subunit 2, 150kDa	CRSP2	30	P	26	A	1	20	A	3	A	8	36	P	26	A	1	EST
202613_at	CTP synthase	CTPS	139	P	82	P	2	248	P	36	A	7	53	P	29	A	2	Homo sapiens CTP synthase (CTPS), mRNA.
202614_at	chromosome 4 open reading frame 1	C4orf1	135	P	88	P	2	174	P	73	P	2	135	P	62	P	2	Homo sapiens chromosome 4 open reading frame 1 (C4ORF1), mRNA.
202615_at	Homo sapiens mRNA; cDNA DKFZp686D0521 (from clone DKFZp686D0521)		90	A	402	P	0	312	P	761	P	0	333	P	784	P	0	EST
202616_s_at	methyl CpG binding protein 2 (Rett syndrome)	MECP2	36	A	19	A	2	21	A	17	A	1	38	A	11	A	4	EST
202620_s_at	procollagen-lysine, 2-oxoglutarate 5-dioxygenase (lysine hydroxylase) 2	PLOD2	4	A	29	A	0	64	P	12	A	5	22	P	7	A	3	Homo sapiens procollagen-lysine, 2-oxoglutarate 5-dioxygenase (lysine hydroxylase) 2 (PLOD2), mRNA.
202621_at	interferon regulatory factor 3	IRF3	97	P	98	A	1	57	A	71	A	1	173	P	101	A	2	Homo sapiens interferon regulatory factor 3 (IRF3), mRNA.
202622_s_at	spinocerebellar ataxia 2 (olivopontocerebellar ataxia 2, autosomal dominant, ataxin 2)	SCA2	6	A	50	A	0	37	A	15	A	2	67	P	45	A	1	Homo sapiens spinocerebellar ataxia 2 (olivopontocerebellar ataxia 2, autosomal dominant, ataxin 2) (SCA2), mRNA.
202625_at	v-yes-1 Yamaguchi sarcoma viral related oncogene homolog	LYN	72	P	528	P	0	91	P	233	P	0	710	P	201	P	4	EST
202627_s_at	serine (or cysteine) proteinase inhibitor, clade E (nexin, plasminogen activator inhibitor type 1), member 1	SERPINE1	5	A	5	A	1	5	A	10	A	0	4	A	16	A	0	EST
202630_at	amyloid beta precursor protein (cytoplasmic tail) binding protein 2	APPBP2	126	P	145	P	1	96	P	55	A	2	56	P	63	A	1	EST
202632_at	diptheria toxin resistance protein required for diphthamide biosynthesis-like 1 (S. cerevisiae)	DPH2L1	22	A	10	A	2	55	A	23	A	2	27	A	24	A	1	Homo sapiens diptheria toxin resistance protein required for diphthamide biosynthesis (Saccharomyces)-like 1 (DPH2L1), mRNA.
202633_at	topoisomerase (DNA) II binding protein	TOPBP1	218	P	44	A	5	84	P	68	A	1	169	P	93	P	2	Homo sapiens topoisomerase (DNA) II binding protein (TOPBP1), mRNA.
202634_at	polymerase (RNA) II (DNA directed) polypeptide K, 7.0kDa	POLR2K	294	P	150	P	2	96	P	137	P	1	84	P	79	A	1	EST
202636_at	zinc finger protein 103 homolog (mouse)	ZFP103	336	P	199	A	2	198	P	189	A	1	217	P	235	A	1	Homo sapiens zinc finger protein homologous to Zfp103 in mouse (ZFP103), mRNA.
202638_s_at	intercellular adhesion molecule 1 (CD54), human rhinovirus receptor	ICAM1	55	A	48	A	1	67	P	74	A	1	89	P	62	A	1	Homo sapiens intercellular adhesion molecule 1 (CD54), human rhinovirus receptor (ICAM1), mRNA.
202639_s_at	RAN binding protein 3	RANBP3	43	A	57	A	1	12	A	24	A	1	9	A	37	A	0	EST
202641_at	ADP-ribosylation factor-like 3	ARL3	211	P	156	P	1	282	P	137	A	2	147	P	143	P	1	Homo sapiens ADP-ribosylation factor-like 3 (ARL3), mRNA.
202642_s_at	transformation/transcription domain-associated protein	TRRAP	95	P	99	A	1	70	A	110	P	1	86	P	77	A	1	Homo sapiens transformationtranscription domain-associated protein (TRRAP), mRNA.
202644_s_at	tumor necrosis factor, alpha-induced protein 3	TNFAIP3	741	P	1310	P	1	499	P	896	P	1	921	P	665	P	1	Homo sapiens tumor necrosis factor, alpha-induced protein 3 (TNFAIP3), mRNA.
202645_s_at	multiple endocrine neoplasia I	MEN1	137	P	139	M	1	122	P	227	P	1	74	P	165	A	0	Homo sapiens multiple endocrine neoplasia I (MEN1), mRNA.
202646_s_at	NRAS-related gene	D1S155E	568	P	475	P	1	670	P	537	P	1	433	P	365	P	1	EST
202652_at	amyloid beta (A4) precursor protein-binding, family B, member 1 (Fe65)	APBB1	12	A	18	A	1	12	A	77	A	0	4	A	22	A	0	Homo sapiens amyloid beta (A4) precursor protein-binding, family B, member 1 (Fe65) (APBB1), mRNA.
202653_s_at	axotrophin	AXOT	112	P	319	P	0	70	P	63	P	1	127	P	136	P	1	Homo sapiens, hypothetical protein DKFZp586F1122 similar to axotrophin, clone IMAGE:3449089, mRNA, partial cds.
202655_at	arginine-rich, mutated in early stage tumors	ARMET	224	P	223	P	1	728	P	439	P	2	293	P	312	P	1	Homo sapiens arginine-rich, mutated in early stage tumors (ARMET), mRNA.
202658_at	peroxisomal biogenesis factor 11B	PEX11B	200	P	113	A	2	232	P	75	A	3	135	P	118	A	1	Homo sapiens peroxisomal biogenesis factor 11B (PEX11B), mRNA.
202659_at	proteasome (prosome, macropain) subunit, beta type, 10	PSMB10	424	P	760	P	1	637	P	640	P	1	972	P	682	P	1	Homo sapiens proteasome (prosome, macropain) subunit, beta type, 10 (PSMB10), mRNA.
202660_at	ESTs, Highly similar to IP3S_HUMAN Inositol 1,4,5-trisphosphate receptor type 2 (Type 2 inositol 1,4,5-trisphosphate receptor) (Type 2 InsP3 receptor) (IP3 receptor isoform 2) (InsP3R2) [H.sapiens]		52	P	77	P	1	43	A	78	P	1	55	P	66	A	1	EST
202664_at	Homo sapiens, clone IMAGE:5264268, mRNA		32	P	1152	P	0	126	P	527	P	0	579	P	602	P	1	EST
202666_s_at	BAF53	BAF53A	143	P	39	P	4	44	P	19	A	2	32	P	65	P	0	Homo sapiens BAF53 (BAF53A), mRNA.
202667_s_at	HLA class II region expressed gene KE4	HKE4	80	P	21	A	4	106	P	106	A	1	50	P	94	A	1	Homo sapiens HLA class II region expressed gene KE4 (HKE4), mRNA.
202668_at	ephrin-B2	EFNB2	599	P	21	A	28	28	A	30	A	1	142	M	64	A	2	EST
202670_at	mitogen-activated protein kinase kinase 1	MAP2K1	145	P	172	P	1	474	P	230	P	2	501	P	321	P	2	EST
202671_s_at	pyridoxal (pyridoxine, vitamin B6) kinase	PDXK	208	P	113	P	2	444	P	71	A	6	273	P	181	P	2	Homo sapiens pyridoxal (pyridoxine, vitamin B6) kinase (PDXK), mRNA.
202672_s_at	activating transcription factor 3	ATF3	241	P	459	P	1	2259	P	130	P	17	155	P	87	A	2	Homo sapiens activating transcription factor 3 (ATF3), mRNA.
202673_at	dolichyl-phosphate mannosyltransferase polypeptide 1, catalytic subunit	DPM1	422	P	223	P	2	338	P	171	P	2	350	P	198	P	2	Homo sapiens dolichyl-phosphate mannosyltransferase polypeptide 1, catalytic subunit (DPM1), mRNA.
202674_s_at	LIM domain only 7	LMO7	15	A	21	A	1	2	A	23	A	0	13	A	27	A	0	Homo sapiens LIM domain only 7 (LMO7), mRNA.
202675_at	succinate dehydrogenase complex, subunit B, iron sulfur (Ip)	SDHB	29	P	80	P	0	115	P	121	P	1	88	P	138	P	1	Homo sapiens succinate dehydrogenase complex, subunit B, iron sulfur (Ip) (SDHB), nuclear gene encoding mitochondrial protein, mRNA.
202678_at	general transcription factor IIA, 2, 12kDa	GTF2A2	123	P	50	A	2	193	P	69	M	3	124	P	79	A	2	Homo sapiens general transcription factor IIA, 2 (12kD subunit) (GTF2A2), mRNA.
202679_at	Niemann-Pick disease, type C1	NPC1	66	P	136	P	0	127	P	166	P	1	101	P	201	P	1	Homo sapiens Niemann-Pick disease, type C1 (NPC1), mRNA.
202680_at	general transcription factor IIE, polypeptide 2, beta 34kDa	GTF2E2	179	P	158	A	1	252	P	201	A	1	254	P	231	A	1	Homo sapiens general transcription factor IIE, polypeptide 2 (beta subunit, 34kD) (GTF2E2), mRNA.
202683_s_at	RNA (guanine-7-) methyltransferase	RNMT	84	P	102	P	1	110	P	149	P	1	125	P	109	A	1	Homo sapiens RNA (guanine-7-) methyltransferase (RNMT), mRNA.
202686_s_at	AXL receptor tyrosine kinase	AXL	36	A	58	A	1	10	A	18	A	1	28	A	60	A	0	Homo sapiens AXL receptor tyrosine kinase (AXL), transcript variant 1, mRNA.
202688_at	tumor necrosis factor (ligand) superfamily, member 10	TNFSF10	1478	P	2374	P	1	411	P	297	P	1	939	P	408	P	2	Homo sapiens tumor necrosis factor (ligand) superfamily, member 10 (TNFSF10), mRNA.
202689_at	chromosome 3p21.1 gene sequence	HUMAGCGB	114	A	137	A	1	46	A	30	A	2	128	A	105	A	1	Homo sapiens chromosome 3p21.1 gene sequence (HUMAGCGB), mRNA.
202690_s_at	small nuclear ribonucleoprotein D1 polypeptide 16kDa	SNRPD1	240	P	115	P	2	381	P	117	P	3	127	P	88	A	1	Homo sapiens, small nuclear ribonucleoprotein D1 polypeptide (16kD), clone MGC:2222, mRNA, complete cds.
202692_s_at	upstream binding transcription factor, RNA polymerase I	UBTF	42	A	30	A	1	15	A	94	A	0	20	A	39	A	1	Homo sapiens upstream binding transcription factor, RNA polymerase I (UBTF), mRNA.
202693_s_at	serine/threonine kinase 17a (apoptosis-inducing)	STK17A	47	A	262	P	0	102	P	379	P	0	139	P	105	P	1	EST
202696_at	oxidative-stress responsive 1	OSR1	45	P	102	A	0	104	A	202	P	1	143	P	87	A	2	Homo sapiens oxidative-stress responsive 1 (OSR1), mRNA.
202697_at	cleavage and polyadenylation specific factor 5, 25 kDa	CPSF5	71	P	60	P	1	177	P	119	P	1	83	P	102	P	1	Homo sapiens cleavage and polyadenylation specific factor 5, 25 kD subunit (CPSF5), mRNA.
202702_at	tripartite motif-containing 26	TRIM26	345	P	291	P	1	133	A	178	A	1	311	P	268	A	1	Homo sapiens zinc finger protein 173 (ZNF173), mRNA.
202703_at	dual specificity phosphatase 11 (RNA/RNP complex 1-interacting)	DUSP11	131	P	104	A	1	150	P	104	A	1	101	P	373	A	0	Homo sapiens dual specificity phosphatase 11 (RNARNP complex 1-interacting) (DUSP11), mRNA.
202704_at	transducer of ERBB2, 1	TOB1	1505	P	209	P	7	184	P	215	P	1	118	P	398	P	0	EST
202705_at	cyclin B2	CCNB2	210	P	63	A	3	178	P	46	A	4	231	P	21	A	11	Homo sapiens cyclin B2 (CCNB2), mRNA.
202706_s_at	uridine monophosphate synthetase (orotate phosphoribosyl transferase and orotidine-5'-decarboxylase)	UMPS	267	P	125	P	2	199	P	71	A	3	78	P	113	P	1	Homo sapiens clone TA-UMPSpoly mRNA for UMP synthase, complete cds.
202708_s_at	histone 2, H2be	HIST2H2BE	237	P	413	P	1	590	P	453	P	1	149	P	302	P	0	Homo sapiens H2B histone family, member Q (H2BFQ), mRNA.
202709_at	fibromodulin	FMOD	159	P	73	P	2	501	P	103	P	5	41	P	149	P	0	Homo sapiens fibromodulin (FMOD), mRNA.
202710_at	BET1 homolog (S. cerevisiae)	BET1	121	P	95	P	1	124	P	56	A	2	82	P	56	A	1	Homo sapiens, Golgi vesicular membrane trafficking protein p18, clone MGC:5210, mRNA, complete cds.
202711_at	ephrin-B1	EFNB1	8	A	52	A	0	4	A	72	A	0	23	A	66	A	0	Homo sapiens ephrin-B1 (EFNB1), mRNA.
202712_s_at	creatine kinase, mitochondrial 1 (ubiquitous)	CKMT1	343	P	88	A	4	134	P	90	A	1	94	P	149	A	1	Homo sapiens creatine kinase, mitochondrial 1 (ubiquitous) (CKMT1), nuclear gene encoding mitochondrial protein, mRNA.
202715_at	carbamoyl-phosphate synthetase 2, aspartate transcarbamylase, and dihydroorotase	CAD	92	P	59	A	2	100	A	10	A	10	29	A	27	A	1	Homo sapiens carbamoyl-phosphate synthetase 2, aspartate transcarbamylase, and dihydroorotase (CAD), nuclear gene encoding mitochondrial protein, mRNA.
202716_at	protein tyrosine phosphatase, non-receptor type 1	PTPN1	141	P	268	P	1	96	P	110	A	1	140	P	268	P	1	Homo sapiens protein tyrosine phosphatase, non-receptor type 1 (PTPN1), mRNA.
202717_s_at	CDC16 cell division cycle 16 homolog (S. cerevisiae)	CDC16	61	P	84	P	1	89	P	143	P	1	77	P	123	P	1	Homo sapiens CDC16 (cell division cycle 16, S. cerevisiae, homolog) (CDC16), mRNA.
202718_at	insulin-like growth factor binding protein 2, 36kDa	IGFBP2	6	A	9	A	1	14	A	28	A	1	11	A	19	A	1	Homo sapiens insulin-like growth factor binding protein 2 (36kD) (IGFBP2), mRNA.
202722_s_at	glutamine-fructose-6-phosphate transaminase 1	GFPT1	150	P	59	A	3	174	P	42	A	4	139	P	102	A	1	Homo sapiens glutamine-fructose-6-phosphate transaminase 1 (GFPT1), mRNA.
202724_s_at	forkhead box O1A (rhabdomyosarcoma)	FOXO1A	67	P	236	P	0	61	P	106	P	1	198	P	184	P	1	Homo sapiens forkhead box O1A (rhabdomyosarcoma) (FOXO1A), mRNA.
202725_at	polymerase (RNA) II (DNA directed) polypeptide A, 220kDa	POLR2A	82	A	273	A	0	122	A	136	A	1	163	P	230	A	1	Homo sapiens polymerase (RNA) II (DNA directed) polypeptide A (220kD) (POLR2A), mRNA.
202726_at	ligase I, DNA, ATP-dependent	LIG1	231	P	140	A	2	78	A	89	A	1	52	A	110	A	0	Homo sapiens ligase I, DNA, ATP-dependent (LIG1), mRNA.
202727_s_at	interferon gamma receptor 1	IFNGR1	369	P	754	P	0	472	P	638	P	1	943	P	1007	P	1	Homo sapiens interferon gamma receptor 1 (IFNGR1), mRNA.
202729_s_at	latent transforming growth factor beta binding protein 1	LTBP1	6	A	190	P	0	130	P	178	A	1	142	P	126	M	1	Homo sapiens latent transforming growth factor beta binding protein 1 (LTBP1), mRNA.
202731_at	programmed cell death 4 (neoplastic transformation inhibitor)	PDCD4	108	P	99	P	1	98	P	46	A	2	64	P	57	P	1	Homo sapiens programmed cell death 4 (PDCD4), mRNA.
202732_at	protein kinase (cAMP-dependent, catalytic) inhibitor gamma	PKIG	38	A	88	A	0	170	P	89	A	2	80	A	75	A	1	Homo sapiens protein kinase (cAMP-dependent, catalytic) inhibitor gamma (PKIG), mRNA.
202733_at	procollagen-proline, 2-oxoglutarate 4-dioxygenase (proline 4-hydroxylase), alpha polypeptide II	P4HA2	254	P	58	A	4	80	P	45	A	2	70	P	74	A	1	Homo sapiens procollagen-proline, 2-oxoglutarate 4-dioxygenase (proline 4-hydroxylase), alpha polypeptide II (P4HA2), mRNA.
202734_at	thyroid hormone receptor interactor 10	TRIP10	122	P	97	A	1	131	P	91	A	1	67	P	125	P	1	Homo sapiens thyroid hormone receptor interactor 10 (TRIP10), mRNA.
202735_at	emopamil binding protein (sterol isomerase)	EBP	108	P	54	A	2	101	A	67	A	2	85	A	56	A	2	Homo sapiens emopamil-binding protein (sterol isomerase) (EBP), mRNA.
202736_s_at	LSM4 homolog, U6 small nuclear RNA associated (S. cerevisiae)	LSM4	75	P	104	P	1	101	P	110	M	1	22	A	81	A	0	EST
202739_s_at	phosphorylase kinase, beta	PHKB	135	P	142	P	1	76	P	97	A	1	182	P	71	A	3	Homo sapiens phosphorylase kinase, beta (PHKB), mRNA.
202740_at	aminoacylase 1	ACY1	97	P	52	A	2	148	P	74	A	2	152	P	78	A	2	Homo sapiens aminoacylase 1 (ACY1), mRNA.
202742_s_at	protein kinase, cAMP-dependent, catalytic, beta	PRKACB	8	A	78	P	0	28	P	51	P	1	15	A	40	P	0	Homo sapiens protein kinase, cAMP-dependent, catalytic, beta (PRKACB), mRNA.
202743_at	phosphoinositide-3-kinase, regulatory subunit, polypeptide 3 (p55, gamma)	PIK3R3	180	P	28	A	6	66	A	34	A	2	46	A	46	A	1	EST
202744_at	solute carrier family 20 (phosphate transporter), member 2	SLC20A2	39	A	25	A	2	2	A	64	A	0	18	A	16	A	1	Homo sapiens solute carrier family 20 (phosphate transporter), member 2 (SLC20A2), mRNA.
202745_at	ubiquitin specific protease 8	USP8	58	P	75	M	1	52	A	26	A	2	42	A	13	A	3	Homo sapiens ubiquitin specific protease 8 (USP8), mRNA.
202746_at	integral membrane protein 2A	ITM2A	23	P	110	P	0	64	P	123	P	1	30	P	95	P	0	Human DNA sequence from PAC 696H22 on chromosome Xq21.1-21.2. Contains a mouse E25 like gene, a Kinesin like pseudogene and ESTs
202748_at	guanylate binding protein 2, interferon-inducible	GBP2	854	P	1787	P	0	206	P	744	P	0	681	P	665	P	1	Homo sapiens guanylate binding protein 2, interferon-inducible (GBP2), mRNA.
202749_at	tryptophan rich basic protein	WRB	140	P	128	P	1	139	P	160	P	1	61	P	61	A	1	Homo sapiens tryptophan rich basic protein (WRB), mRNA.
202756_s_at	glypican 1	GPC1	115	A	13	A	9	13	A	11	A	1	26	A	53	A	0	Homo sapiens glypican 1 (GPC1), mRNA.
202758_s_at	regulatory factor X-associated ankyrin-containing protein	RFXANK	106	P	11	A	10	66	A	78	A	1	56	P	91	A	1	Homo sapiens regulatory factor X-associated ankyrin-containing protein (RFXANK), mRNA.
202760_s_at	A kinase (PRKA) anchor protein 2	AKAP2	77	P	147	P	1	60	P	83	A	1	18	M	62	A	0	Homo sapiens A kinase (PRKA) anchor protein 2 (AKAP2), mRNA.
202762_at	Rho-associated, coiled-coil containing protein kinase 2	ROCK2	2	A	83	A	0	57	A	12	A	5	59	A	23	A	3	Homo sapiens mRNA; cDNA DKFZp586L0218 (from clone DKFZp586L0218).
202763_at	caspase 3, apoptosis-related cysteine protease	CASP3	60	M	91	P	1	103	P	98	P	1	56	P	154	P	0	Homo sapiens caspase 3, apoptosis-related cysteine protease (CASP3), mRNA.
202764_at	stromal interaction molecule 1	STIM1	87	P	100	P	1	32	A	109	P	0	88	P	138	P	1	Homo sapiens stromal interaction molecule 1 (STIM1), mRNA.
202766_s_at	fibrillin 1 (Marfan syndrome)	FBN1	15	A	16	A	1	35	A	33	A	1	24	A	21	A	1	Homo sapiens fibrillin 1 (Marfan syndrome) (FBN1), mRNA.
202767_at	acid phosphatase 2, lysosomal	ACP2	86	P	184	P	0	116	P	102	A	1	134	P	99	P	1	Homo sapiens acid phosphatase 2, lysosomal (ACP2), mRNA.
202768_at	FBJ murine osteosarcoma viral oncogene homolog B	FOSB	866	P	15	A	57	144	P	21	A	7	140	P	11	A	13	Homo sapiens FBJ murine osteosarcoma viral oncogene homolog B (FOSB), mRNA.
202769_at	cyclin G2	CCNG2	510	P	364	P	1	565	P	440	P	1	390	P	452	P	1	EST
202772_at	3-hydroxymethyl-3-methylglutaryl-Coenzyme A lyase (hydroxymethylglutaricaciduria)	HMGCL	201	P	193	P	1	295	P	286	M	1	214	P	265	P	1	Homo sapiens 3-hydroxymethyl-3-methylglutaryl-Coenzyme A lyase (hydroxymethylglutaricaciduria) (HMGCL), mRNA.
202774_s_at	splicing factor, arginine/serine-rich 8 (suppressor-of-white-apricot homolog, Drosophila)	SFRS8	221	P	207	A	1	154	M	212	P	1	123	P	245	P	1	EST
202776_at	acidic 82 kDa protein mRNA	HSU15552	302	P	184	P	2	190	P	242	P	1	183	P	182	P	1	Homo sapiens acidic 82 kDa protein mRNA (HSU15552), mRNA.
202777_at	soc-2 suppressor of clear homolog (C. elegans)	SHOC2	147	P	227	P	1	187	P	326	P	1	260	P	345	P	1	Homo sapiens suppressor of clear, C. elegans, homolog of (SHOC2), mRNA.
202778_s_at	zinc finger protein 198	ZNF198	241	P	321	P	1	205	P	256	P	1	149	P	220	P	1	Homo sapiens zinc finger protein 198 (ZNF198), mRNA.
202779_s_at	ubiquitin carrier protein	E2-EPF	27	A	28	A	1	104	P	25	A	4	17	A	12	A	1	Homo sapiens ubiquitin carrier protein (E2-EPF), mRNA.
202780_at	3-oxoacid CoA transferase	OXCT	59	A	32	A	2	184	P	163	A	1	58	A	43	A	1	Homo sapiens 3-oxoacid CoA transferase (OXCT), nuclear gene encoding mitochondrial protein, mRNA.
202781_s_at	skeletal muscle and kidney enriched inositol phosphatase	SKIP	59	P	194	M	0	119	P	384	P	0	79	P	218	A	0	EST
202783_at	nicotinamide nucleotide transhydrogenase	NNT	12	A	38	A	0	7	A	18	A	0	23	P	49	P	0	Human nicotinamide nucleotide transhydrogenase mRNA, nuclear gene encoding mitochondrial protein, complete cds.
202785_at	NADH dehydrogenase (ubiquinone) 1 alpha subcomplex, 7, 14.5kDa	NDUFA7	157	P	7	A	23	251	P	19	A	13	73	A	9	A	8	Homo sapiens NADH dehydrogenase (ubiquinone) 1 alpha subcomplex, 7 (14.5kD, B14.5a) (NDUFA7), mRNA.
202786_at	serine threonine kinase 39 (STE20/SPS1 homolog, yeast)	STK39	408	P	83	P	5	276	P	51	A	5	64	P	26	A	2	Homo sapiens Ste-20 related kinase (SPAK), mRNA.
202787_s_at	mitogen-activated protein kinase-activated protein kinase 3	MAPKAPK3	45	P	107	P	0	50	A	92	A	1	114	P	113	P	1	Human mitogen activated protein kinase activated protein kinase-3 mRNA, complete cds.
202789_at			76	A	178	P	0	96	A	182	A	1	49	A	92	A	1	Human DNA sequence from clone RP3-511B24 on chromosome 20q11.2-12. Contains the 3 end of the TOP1 gene for topoisomerase (DNA) I, the PLCG1 gene for phospholipase C gamma 1, gene KIAA0395 for a possible homeobox protein, a 60S Ribosomal Protein L...
202790_at	claudin 7	CLDN7	135	M	14	A	10	7	A	46	A	0	117	A	20	A	6	Homo sapiens claudin 7 (CLDN7), mRNA.
202793_at	putative protein similar to nessy (Drosophila)	C3F	25	M	6	A	4	33	A	18	A	2	19	A	30	A	1	Homo sapiens putative protein similar to nessy (Drosophila) (C3F), mRNA.
202794_at	inositol polyphosphate-1-phosphatase	INPP1	263	P	210	P	1	110	P	171	P	1	412	P	164	P	3	Homo sapiens inositol polyphosphate-1-phosphatase (INPP1), mRNA.
202796_at	synaptopodin	KIAA1029	5	A	32	A	0	3	A	11	A	0	16	A	31	A	1	Homo sapiens synaptopodin (KIAA1029), mRNA.
202798_at	SEC24 related gene family, member B (S. cerevisiae)	SEC24B	149	P	110	P	1	194	P	81	P	2	166	P	81	P	2	Homo sapiens SEC24 (S. cerevisiae) related gene family, member B (SEC24B), mRNA.
202799_at	ClpP caseinolytic protease, ATP-dependent, proteolytic subunit homolog (E. coli)	CLPP	109	A	11	A	10	168	P	54	A	3	40	A	88	A	0	Homo sapiens ClpP (caseinolytic protease, ATP-dependent, proteolytic subunit, E. coli) homolog (CLPP), nuclear gene encoding mitochondrial protein, mRNA.
2028_s_at	E2F transcription factor 1	E2F1	64	P	78	P	1	19	A	78	P	0	43	A	120	A	0
202800_at	solute carrier family 1 (glial high affinity glutamate transporter), member 3	SLC1A3	4	A	7	A	1	6	A	27	A	0	13	A	36	A	0	Homo sapiens solute carrier family 1 (glial high affinity glutamate transporter), member 3 (SLC1A3), nuclear gene encoding mitochondrial protein, mRNA.
202801_at	protein kinase, cAMP-dependent, catalytic, alpha	PRKACA	136	A	208	A	1	97	A	146	A	1	119	A	199	A	1	Homo sapiens protein kinase, cAMP-dependent, catalytic, alpha (PRKACA), mRNA.
202803_s_at	integrin, beta 2 (antigen CD18 (p95), lymphocyte function-associated antigen 1; macrophage antigen 1 (mac-1) beta subunit)	ITGB2	259	P	1702	P	0	524	P	2186	P	0	3435	P	3216	P	1	Homo sapiens integrin, beta 2 (antigen CD18 (p95), lymphocyte function-associated antigen 1; macrophage antigen 1 (mac-1) beta subunit) (ITGB2), mRNA.
202804_at	ATP-binding cassette, sub-family C (CFTR/MRP), member 1	ABCC1	209	P	237	P	1	209	P	164	P	1	208	P	152	P	1	EST
202806_at	drebrin 1	DBN1	58	A	87	A	1	11	A	23	A	0	63	A	13	A	5	Homo sapiens drebrin 1 (DBN1), mRNA.
202807_s_at	target of myb1 (chicken)	TOM1	66	P	122	M	1	54	A	155	A	0	90	P	115	A	1	Homo sapiens target of myb1 (chicken) homolog (TOM1), mRNA.
202810_at	developmentally regulated GTP binding protein 1	DRG1	419	P	269	P	2	609	P	453	P	1	314	P	440	P	1	Homo sapiens developmentally regulated GTP-binding protein 1 (DRG1), mRNA.
202811_at	associated molecule with the SH3 domain of STAM	AMSH	371	P	254	P	1	252	P	174	P	1	175	P	167	P	1	Homo sapiens associated molecule with the SH3 domain of STAM (AMSH), mRNA.
202812_at	glucosidase, alpha; acid (Pompe disease, glycogen storage disease type II)	GAA	146	P	90	A	2	66	A	82	A	1	285	P	124	A	2	Homo sapiens glucosidase, alpha; acid (Pompe disease, glycogen storage disease type II) (GAA), mRNA.
202813_at	TAR (HIV) RNA binding protein 1	TARBP1	96	P	66	A	1	108	P	228	A	0	73	A	126	A	1	Homo sapiens TAR (HIV) RNA-binding protein 1 (TARBP1), mRNA.
202814_s_at	HMBA-inducible	HIS1	412	P	197	P	2	118	P	188	P	1	82	P	330	M	0	EST
202816_s_at	synovial sarcoma translocation, chromosome 18	SS18	22	P	33	A	1	38	P	41	A	1	35	P	58	A	1	EST
202818_s_at	transcription elongation factor B (SIII), polypeptide 3 (110kDa, elongin A)	TCEB3	153	P	227	P	1	305	P	298	P	1	109	P	324	A	0	EST
202820_at	aryl hydrocarbon receptor	AHR	286	P	47	P	6	23	P	70	M	0	43	P	40	A	1	Homo sapiens aryl hydrocarbon receptor (AHR), mRNA.
202822_at	LIM domain containing preferred translocation partner in lipoma	LPP	602	P	482	P	1	547	P	282	P	2	385	P	294	P	1	EST
202824_s_at	transcription elongation factor B (SIII), polypeptide 1 (15kDa, elongin C)	TCEB1	420	P	183	P	2	445	P	90	A	5	511	P	232	P	2	Homo sapiens transcription elongation factor B (SIII), polypeptide 1 (15kD, elongin C) (TCEB1), mRNA.
202825_at	solute carrier family 25 (mitochondrial carrier; adenine nucleotide translocator), member 4	SLC25A4	86	M	38	A	2	271	P	68	A	4	42	A	131	A	0	Homo sapiens solute carrier family 25 (mitochondrial carrier; adenine nucleotide translocator), member 4 (SLC25A4), nuclear gene encoding mitochondrial protein, mRNA.
202826_at	serine protease inhibitor, Kunitz type 1	SPINT1	140	P	24	A	6	19	A	19	A	1	36	A	25	A	1	Homo sapiens serine protease inhibitor, Kunitz type 1 (SPINT1), mRNA.
202829_s_at	synaptobrevin-like 1	SYBL1	244	P	334	P	1	254	P	280	P	1	386	P	228	P	2	Homo sapiens synaptobrevin-like 1 (SYBL1), mRNA.
202831_at	glutathione peroxidase 2 (gastrointestinal)	GPX2	28	A	30	A	1	58	A	65	A	1	276	P	64	A	4	Homo sapiens glutathione peroxidase 2 (gastrointestinal) (GPX2), mRNA.
202834_at	angiotensinogen (serine (or cysteine) proteinase inhibitor, clade A (alpha-1 antiproteinase, antitrypsin), member 8)	AGT	45	A	86	P	1	93	P	136	P	1	38	P	88	A	0	Homo sapiens serine (or cysteine) proteinase inhibitor, clade A (alpha-1 antiproteinase, antitrypsin), member 8 (SERPINA8), mRNA.
202836_s_at	similar to S. pombe dim1+	DIM1	461	P	315	P	1	1074	P	475	P	2	1128	P	374	P	3	Homo sapiens similar to S. pombe dim1+ (DIM1), mRNA.
202838_at	fucosidase, alpha-L- 1, tissue	FUCA1	275	P	134	A	2	239	P	96	A	2	570	P	239	M	2	Homo sapiens fucosidase, alpha-L- 1, tissue (FUCA1), mRNA.
202839_s_at	NADH dehydrogenase (ubiquinone) 1 beta subcomplex, 7, 18kDa	NDUFB7	111	P	50	A	2	169	P	10	A	17	26	A	55	A	0	Homo sapiens NADH dehydrogenase (ubiquinone) 1 beta subcomplex, 7 (18kD, B18) (NDUFB7), mRNA.
202840_at	TAF15 RNA polymerase II, TATA box binding protein (TBP)-associated factor, 68kDa	TAF15	99	P	207	P	0	122	P	218	P	1	70	P	285	P	0	Homo sapiens TATA box binding protein (TBP)-associated factor, RNA polymerase II, N, 68kD (RNA-binding protein 56) (TAF2N), mRNA.
202842_s_at	DnaJ (Hsp40) homolog, subfamily B, member 9	DNAJB9	466	P	226	P	2	316	P	195	P	2	182	P	197	P	1	Homo sapiens mRNA; cDNA DKFZp564F1862 (from clone DKFZp564F1862); complete cds.
202845_s_at	ralA binding protein 1	RALBP1	97	P	183	P	1	177	P	535	P	0	192	P	376	P	1	Homo sapiens ralA binding protein 1 (RALBP1), mRNA.
202846_s_at	phosphatidylinositol glycan, class C	PIGC	309	P	249	P	1	214	P	227	A	1	169	P	187	A	1	Homo sapiens phosphatidylinositol glycan, class C (PIGC), mRNA.
202847_at	phosphoenolpyruvate carboxykinase 2 (mitochondrial)	PCK2	251	P	135	A	2	175	P	144	A	1	342	P	106	A	3	Homo sapiens phosphoenolpyruvate carboxykinase 2 (mitochondrial) (PCK2), mRNA.
202850_at	ATP-binding cassette, sub-family D (ALD), member 3	ABCD3	235	P	56	M	4	82	P	69	P	1	71	P	58	A	1	Homo sapiens ATP-binding cassette, sub-family D (ALD), member 3 (ABCD3), mRNA.
202853_s_at	RYK receptor-like tyrosine kinase	RYK	250	P	134	A	2	163	P	148	A	1	61	P	91	P	1	Homo sapiens RYK receptor-like tyrosine kinase (RYK), mRNA.
202854_at	hypoxanthine phosphoribosyltransferase 1 (Lesch-Nyhan syndrome)	HPRT1	362	P	163	P	2	356	P	100	P	4	387	P	154	P	3	Homo sapiens hypoxanthine phosphoribosyltransferase 1 (Lesch-Nyhan syndrome) (HPRT1), mRNA.
202855_s_at	solute carrier family 16 (monocarboxylic acid transporters), member 3	SLC16A3	7	A	46	A	0	6	A	15	A	0	13	A	37	A	0	EST
202857_at	transmembrane protein 4	TMEM4	885	P	220	P	4	908	P	129	P	7	386	P	228	P	2	Homo sapiens transmembrane protein 4 (TMEM4), mRNA.
202858_at	U2(RNU2) small nuclear RNA auxillary factor 1	U2AF1	571	P	218	A	3	655	P	449	A	1	580	P	765	A	1	Homo sapiens U2(RNU2) small nuclear RNA auxillary factor 1 (non-standard symbol) (U2AF1), mRNA.
202862_at	fumarylacetoacetate hydrolase (fumarylacetoacetase)	FAH	167	P	26	A	6	107	P	47	A	2	50	P	45	A	1	Homo sapiens fumarylacetoacetate (FAH), mRNA.
202863_at	nuclear antigen Sp100	SP100	352	P	796	P	0	94	P	275	P	0	363	P	264	P	1	Homo sapiens nuclear antigen Sp100 (SP100), mRNA.
202868_s_at	POP4 (processing of precursor , S. cerevisiae) homolog	POP4	252	P	137	A	2	265	P	229	P	1	130	P	213	P	1	Homo sapiens POP4 (processing of precursor , S. cerevisiae) homolog (POP4), mRNA.
202870_s_at	CDC20 cell division cycle 20 homolog (S. cerevisiae)	CDC20	63	P	39	A	2	101	P	5	A	19	116	A	6	A	19	Homo sapiens CDC20 (cell division cycle 20, S. cerevisiae, homolog) (CDC20), mRNA.
202871_at	TNF receptor-associated factor 4	TRAF4	145	P	8	A	17	125	A	59	A	2	27	A	11	A	3	Homo sapiens TNF receptor-associated factor 4 (TRAF4), mRNA.
202872_at	ATPase, H+ transporting, lysosomal 42kDa, V1 subunit C, isoform 1	ATP6V1C1	105	P	141	P	1	73	P	55	A	1	128	P	110	A	1	EST
202876_s_at	pre-B-cell leukemia transcription factor 2	PBX2	61	M	688	P	0	139	P	576	P	0	453	P	480	P	1	Homo sapiens pre-B-cell leukemia transcription factor 2 (PBX2), mRNA.
202878_s_at	complement component 1, q subcomponent, receptor 1	C1QR1	93	P	148	P	1	91	A	252	M	0	1036	P	425	P	2	Homo sapiens complement component C1q receptor (C1QR), mRNA.
202880_s_at	pleckstrin homology, Sec7 and coiled/coil domains 1(cytohesin 1)	PSCD1	318	P	514	P	1	211	P	329	P	1	242	P	245	P	1	Homo sapiens pleckstrin homology, Sec7 and coiledcoil domains 1(cytohesin 1) (PSCD1), transcript variant 1, mRNA.
202886_s_at	protein phosphatase 2 (formerly 2A), regulatory subunit A (PR 65), beta isoform	PPP2R1B	63	P	52	A	1	116	P	10	A	12	37	P	28	A	1	Protein phosphatase 2A 65 kDa regulatory subunit-beta mRNA, complete cds.
202888_s_at	alanyl (membrane) aminopeptidase (aminopeptidase N, aminopeptidase M, microsomal aminopeptidase, CD13, p150)	ANPEP	32	P	215	P	0	25	A	113	P	0	361	P	238	P	2	Homo sapiens alanyl (membrane) aminopeptidase (aminopeptidase N, aminopeptidase M, microsomal aminopeptidase, CD13, p150) (ANPEP), mRNA.
202890_at	microtubule-associated protein 7	MAP7	245	P	3	A	88	177	P	5	A	37	54	P	25	A	2	EST
202891_at	nitrilase 1	NIT1	185	P	120	P	2	268	P	241	P	1	114	P	157	A	1	Homo sapiens nitrilase 1 (NIT1), mRNA.
202892_at	CDC23 (cell division cycle 23, yeast, homolog)	CDC23	126	P	115	P	1	60	P	103	A	1	63	P	119	P	1	Homo sapiens CDC23 (cell division cycle 23, yeast, homolog) (CDC23), mRNA.
202893_at	unc-13-like (C. elegans)	UNC13	186	P	60	A	3	295	P	89	A	3	67	A	150	A	0	Homo sapiens UNC13 (C. elegans)-like (UNC13), mRNA.
202894_at	EphB4	EPHB4	387	P	54	A	7	40	A	37	A	1	38	A	34	A	1	Homo sapiens EphB4 (EPHB4) mRNA.
202896_s_at	protein tyrosine phosphatase, non-receptor type substrate 1	PTPNS1	88	A	123	P	1	83	P	123	P	1	146	P	192	P	1	Homo sapiens protein tyrosine phosphatase, non-receptor type substrate 1 (PTPNS1), mRNA.
202900_s_at	nucleoporin 88kDa	NUP88	103	P	76	A	1	162	P	98	P	2	242	P	75	A	3	Homo sapiens nucleoporin 88kD (NUP88), mRNA.
202902_s_at	cathepsin S	CTSS	341	P	1316	P	0	434	P	1227	P	0	1062	P	2025	P	1	Homo sapiens cathepsin S (CTSS), mRNA.
202904_s_at	LSM5 homolog, U6 small nuclear RNA associated (S. cerevisiae)	LSM5	43	P	18	A	2	19	A	1	A	18	10	A	0	A	52	Homo sapiens U6 snRNA-associated Sm-like protein (LSM5), mRNA.
202907_s_at	Nijmegen breakage syndrome 1 (nibrin)	NBS1	400	P	524	P	1	232	P	334	P	1	230	P	295	P	1	Homo sapiens Nijmegen breakage syndrome 1 (nibrin) (NBS1), mRNA.
202908_at	Wolfram syndrome 1 (wolframin)	WFS1	275	P	108	A	3	76	A	113	A	1	81	P	154	M	1	Homo sapiens Wolfram syndrome 1 (wolframin) (WFS1), mRNA.
202910_s_at	CD97 antigen	CD97	74	A	606	P	0	52	A	260	A	0	857	P	618	P	1	Homo sapiens CD97 antigen (CD97), mRNA.
202911_at	mutS homolog 6 (E. coli)	MSH6	272	P	167	A	2	201	P	150	A	1	121	A	75	A	2	Homo sapiens mutS (E. coli) homolog 6 (MSH6), mRNA.
202912_at	adrenomedullin	ADM	95	M	714	P	0	184	P	297	P	1	833	P	1249	P	1	Homo sapiens adrenomedullin (ADM), mRNA.
202917_s_at	S100 calcium binding protein A8 (calgranulin A)	S100A8	3111	P	13814	P	0	7218	P	22496	P	0	9583	P	17208	P	1	Homo sapiens S100 calcium-binding protein A8 (calgranulin A) (S100A8), mRNA.
202920_at	Homo sapiens, clone IMAGE:4246029, mRNA		15	A	28	A	1	16	A	31	A	1	6	A	5	A	1	EST
202922_at	glutamate-cysteine ligase, catalytic subunit	GCLC	119	P	139	P	1	126	P	459	P	0	131	P	116	P	1	EST
202924_s_at	pleiomorphic adenoma gene-like 2	PLAGL2	56	A	171	P	0	61	A	47	A	1	124	P	79	A	2	EST
202926_at	neuroblastoma-amplified protein	NAG	140	M	112	A	1	139	M	148	A	1	70	P	69	A	1	Homo sapiens neuroblastoma-amplified protein (LOC51594), mRNA.
202927_at	protein (peptidyl-prolyl cis/trans isomerase) NIMA-interacting 1	PIN1	105	M	5	A	22	4	A	8	A	0	42	A	13	A	3	Homo sapiens protein (peptidyl-prolyl cistrans isomerase) NIMA-interacting 1 (PIN1), mRNA.
202929_s_at	D-dopachrome tautomerase	DDT	91	P	63	A	1	196	P	14	A	14	38	P	41	A	1	Homo sapiens D-dopachrome tautomerase (DDT), mRNA.
202930_s_at	succinate-CoA ligase, ADP-forming, beta subunit	SUCLA2	129	P	50	P	3	70	P	13	A	5	89	P	21	A	4	Homo sapiens succinate-CoA ligase, ADP-forming, beta subunit (SUCLA2), mRNA.
202933_s_at	v-yes-1 Yamaguchi sarcoma viral oncogene homolog 1	YES1	3	A	62	A	0	120	P	79	A	2	59	P	47	A	1	Homo sapiens v-yes-1 Yamaguchi sarcoma viral oncogene homolog 1 (YES1), mRNA.
202934_at	hexokinase 2	HK2	255	P	281	A	1	49	A	65	A	1	170	P	226	P	1	EST
202936_s_at	SRY (sex determining region Y)-box 9 (campomelic dysplasia, autosomal sex-reversal)	SOX9	317	P	13	A	24	177	A	30	A	6	102	P	36	A	3	Homo sapiens SRY (sex determining region Y)-box 9 (campomelic dysplasia, autosomal sex-reversal) (SOX9), mRNA.
202939_at	zinc metalloproteinase (STE24 homolog, yeast)	ZMPSTE24	253	P	200	P	1	430	P	244	P	2	334	P	266	P	1	Homo sapiens zinc metalloproteinase, STE24 (yeast, homolog) (ZMPSTE24), mRNA.
202941_at	NADH dehydrogenase (ubiquinone) flavoprotein 2, 24kDa	NDUFV2	145	P	121	A	1	520	P	59	A	9	233	P	88	A	3	Homo sapiens NADH dehydrogenase (ubiquinone) flavoprotein 2 (24kD) (NDUFV2), mRNA.
202942_at	electron-transfer-flavoprotein, beta polypeptide	ETFB	837	P	27	A	31	809	P	70	A	12	358	P	81	A	4	Homo sapiens electron-transfer-flavoprotein, beta polypeptide (ETFB), mRNA.
202943_s_at	N-acetylgalactosaminidase, alpha-	NAGA	105	P	190	M	1	108	A	214	A	1	218	P	194	P	1	Human alpha-N-acetylgalactosaminidase mRNA, complete cds.
202945_at	folylpolyglutamate synthase	FPGS	21	A	31	A	1	62	A	32	A	2	66	A	52	A	1	Homo sapiens folylpolyglutamate synthase (FPGS), mRNA.
202947_s_at	glycophorin C (Gerbich blood group)	GYPC	102	A	2001	P	0	850	P	6020	P	0	282	P	2902	P	0	Homo sapiens glycophorin C (Gerbich blood group) (GYPC), transcript variant 1, mRNA.
202948_at	interleukin 1 receptor, type I	IL1R1	125	P	181	P	1	95	P	155	P	1	65	A	104	A	1	Homo sapiens interleukin 1 receptor, type I (IL1R1), mRNA.
202949_s_at	four and a half LIM domains 2	FHL2	9	A	31	A	0	170	A	59	A	3	451	P	32	A	14	Homo sapiens four and a half LIM domains 2 (FHL2), mRNA.
202950_at	crystallin, zeta (quinone reductase)	CRYZ	108	P	37	A	3	44	P	97	A	0	64	P	66	A	1	Homo sapiens crystallin, zeta (quinone reductase) (CRYZ), mRNA.
202951_at	serine/threonine kinase 38	STK38	406	P	663	P	1	154	P	487	P	0	697	P	654	P	1	EST
202953_at	complement component 1, q subcomponent, beta polypeptide	C1QB	12	A	45	A	0	39	A	13	A	3	104	P	38	A	3	Homo sapiens complement component 1, q subcomponent, beta polypeptide (C1QB), mRNA.
202954_at	ubiquitin-conjugating enzyme E2C	UBE2C	149	P	266	A	1	191	P	164	A	1	161	P	156	A	1	Homo sapiens ubiquitin carrier protein E2-C (UBCH10), mRNA.
202957_at	hematopoietic cell-specific Lyn substrate 1	HCLS1	176	P	1447	P	0	416	P	1213	P	0	1544	P	2070	P	1	Homo sapiens hematopoietic cell-specific Lyn substrate 1 (HCLS1), mRNA.
202958_at	protein tyrosine phosphatase, non-receptor type 9	PTPN9	77	M	129	A	1	108	A	130	A	1	104	A	174	A	1	Homo sapiens protein tyrosine phosphatase, non-receptor type 9 (PTPN9), mRNA.
202959_at	methylmalonyl Coenzyme A mutase	MUT	94	P	102	P	1	48	P	77	P	1	83	P	51	A	2	EST
202961_s_at	ATP synthase, H+ transporting, mitochondrial F0 complex, subunit f, isoform 2	ATP5J2	873	P	474	P	2	1396	P	795	P	2	927	P	569	P	2	Homo sapiens ATP synthase, H+ transporting, mitochondrial F0 complex, subunit f, isoform 2 (ATP5J2), mRNA.
202962_at	kinesin family member 13B	KIF13B	183	P	177	P	1	236	P	170	A	1	168	P	144	A	1	Homo sapiens kinesin family member 13B (KIF13B), mRNA.
202963_at	regulatory factor X, 5 (influences HLA class II expression)	RFX5	206	P	175	P	1	220	P	185	A	1	241	P	132	A	2	EST
202965_s_at	calpain 6	CAPN6	7	A	13	A	1	1	A	4	A	0	2	A	12	A	0	Homo sapiens calpain 6 (CAPN6), mRNA.
202967_at	glutathione S-transferase A4	GSTA4	178	P	135	A	1	296	P	155	P	2	116	A	68	A	2	Homo sapiens glutathione S-transferase A4 (GSTA4), mRNA.
202969_at	dual-specificity tyrosine-(Y)-phosphorylation regulated kinase 2	DYRK2	86	P	65	P	1	33	P	74	P	0	55	P	20	A	3	EST
202974_at	membrane protein, palmitoylated 1, 55kDa	MPP1	99	A	710	P	0	417	P	5628	P	0	672	P	1742	P	0	Homo sapiens membrane protein, palmitoylated 1 (55kD) (MPP1), mRNA.
202979_s_at	HCF-binding transcription factor Zhangfei	ZF	52	P	35	P	1	28	P	12	A	2	17	A	34	P	1	Homo sapiens HCF-binding transcription factor Zhangfei (ZF), mRNA.
202980_s_at	seven in absentia homolog 1 (Drosophila)	SIAH1	25	A	5	A	5	41	P	15	A	3	8	A	6	A	1	EST
202982_s_at	peroxisomal long-chain acyl-coA thioesterase	ZAP128	42	A	6	A	8	10	A	7	A	1	45	A	10	A	5	Homo sapiens peroxisomal long-chain acyl-coA thioesterase (ZAP128), mRNA.
202983_at	SWI/SNF related, matrix associated, actin dependent regulator of chromatin, subfamily a, member 3	SMARCA3	233	P	43	A	5	119	P	113	P	1	35	P	92	P	0	EST
202984_s_at	BCL2-associated athanogene 5	BAG5	28	P	24	A	1	13	A	16	A	1	4	A	2	A	2	EST
202990_at	phosphorylase, glycogen; liver (Hers disease, glycogen storage disease type VI)	PYGL	219	P	281	P	1	96	P	599	P	0	411	P	739	P	1	Homo sapiens phosphorylase, glycogen; liver (Hers disease, glycogen storage disease type VI) (PYGL), mRNA.
202991_at	START domain containing 3	STARD3	72	A	8	A	8	13	A	6	A	2	8	A	26	A	0	Homo sapiens steroidogenic acute regulatory protein related (MLN64), mRNA.
202992_at	complement component 7	C7	17	A	11	A	2	2	A	21	A	0	46	A	38	A	1	Homo sapiens complement component 7 (C7), mRNA.
202995_s_at	fibulin 1	FBLN1	28	A	52	P	1	54	M	70	A	1	15	A	83	A	0	Homo sapiens fibulin 1 (FBLN1), transcript variant D, mRNA.
202996_at	polymerase (DNA-directed), delta 4	POLD4	57	A	145	A	0	278	P	78	A	4	27	A	68	A	0	Homo sapiens polymerase (DNA-directed), delta 4 (POLD4), mRNA.
202998_s_at	lysyl oxidase-like 2	LOXL2	23	A	73	A	0	43	A	56	A	1	43	A	6	A	7	Homo sapiens lysyl oxidase-like 2 (LOXL2), mRNA.
203001_s_at	stathmin-like 2	STMN2	4	A	24	A	0	3	A	9	A	0	10	A	11	A	1	Homo sapiens superiorcervical ganglia, neural specific 10 (SCGN10), mRNA.
203002_at	angiomotin like 2	AMOTL2	196	P	33	A	6	26	A	62	A	0	29	A	40	A	1	Homo sapiens Leman coiled-coil protein (LCCP), mRNA.
203003_at	MADS box transcription enhancer factor 2, polypeptide D (myocyte enhancer factor 2D)	MEF2D	27	A	85	P	0	36	A	74	A	0	46	P	108	P	0	EST
203005_at	lymphotoxin beta receptor (TNFR superfamily, member 3)	LTBR	113	P	30	A	4	88	P	64	A	1	163	P	215	A	1	Homo sapiens lymphotoxin beta receptor (TNFR superfamily, member 3 (LTBR), mRNA.
203006_at	inositol polyphosphate-5-phosphatase, 40kDa	INPP5A	222	P	306	P	1	218	P	179	P	1	280	P	290	P	1	Homo sapiens inositol polyphosphate-5-phosphatase, 40kD (INPP5A), mRNA.
203008_x_at	ATP binding protein associated with cell differentiation	APACD	231	P	92	A	3	160	P	97	A	2	254	P	150	A	2	Homo sapiens ATP binding protein associated with cell differentiation (APACD), mRNA.
203010_at	signal transducer and activator of transcription 5A	STAT5A	161	M	330	P	0	202	A	173	A	1	203	P	412	A	0	Homo sapiens signal transducer and activator of transcription 5A (STAT5A), mRNA.
203011_at	inositol(myo)-1(or 4)-monophosphatase 1	IMPA1	191	P	201	P	1	158	P	225	P	1	107	P	124	P	1	Homo sapiens inositol(myo)-1(or 4)-monophosphatase 1 (IMPA1), mRNA.
203013_at	suppressor of S. cerevisiae gcr2	HSGT1	84	M	46	A	2	77	A	110	A	1	48	A	104	A	0	Homo sapiens suppressor of S. cerevisiae gcr2 (HSGT1), mRNA.
203021_at	secretory leukocyte protease inhibitor (antileukoproteinase)	SLPI	314	P	228	A	1	210	M	353	A	1	184	P	358	A	1	Homo sapiens secretory leukocyte protease inhibitor (antileukoproteinase) (SLPI), mRNA.
203022_at	ribonuclease H2, large subunit	RNASEH2A	227	P	50	P	4	134	P	46	A	3	72	P	53	P	1	Homo sapiens ribonuclease HI, large subunit (RNASEHI), mRNA.
203025_at	ARD1 homolog, N-acetyltransferase (S. cerevisiae)	ARD1	278	P	133	A	2	278	P	52	A	5	183	P	205	A	1	Homo sapiens N-acetyltransferase, homolog of S. cerevisiae ARD1 (ARD1), mRNA.
203027_s_at	mevalonate (diphospho) decarboxylase	MVD	3	A	20	A	0	3	A	30	A	0	3	A	78	A	0	EST
203028_s_at	cytochrome b-245, alpha polypeptide	CYBA	254	A	1253	P	0	514	P	991	P	1	57	A	1333	P	0	Homo sapiens cytochrome b-245, alpha polypeptide (CYBA), mRNA.
203029_s_at	protein tyrosine phosphatase, receptor type, N polypeptide 2	PTPRN2	210	P	11	A	18	65	A	13	A	5	35	A	20	A	2	Homo sapiens protein tyrosine phosphatase, receptor type, N polypeptide 2 (PTPRN2), mRNA.
203031_s_at	uroporphyrinogen III synthase (congenital erythropoietic porphyria)	UROS	118	P	24	A	5	140	P	66	A	2	70	P	34	A	2	Homo sapiens uroporphyrinogen III synthase (congenital erythropoietic porphyria) (UROS), mRNA.
203032_s_at	fumarate hydratase	FH	15	A	19	A	1	4	A	45	A	0	9	A	37	A	0	EST
203034_s_at	ribosomal protein L27a	RPL27A	4956	P	4402	P	1	11347	P	7164	P	2	4121	P	6280	P	1	Homo sapiens ribosomal protein L27a (RPL27A), mRNA.
203035_s_at	protein inhibitor of activated STAT3	PIAS3	181	P	78	A	2	64	A	29	A	2	68	P	30	A	2	Homo sapiens protein inhibitor of activated STAT3 (PIAS3), mRNA.
203038_at	protein tyrosine phosphatase, receptor type, K	PTPRK	918	P	4	A	255	190	P	8	A	25	103	P	35	A	3	Homo sapiens protein tyrosine phosphatase, receptor type, K (PTPRK), mRNA.
203039_s_at	NADH dehydrogenase (ubiquinone) Fe-S protein 1, 75kDa (NADH-coenzyme Q reductase)	NDUFS1	99	P	63	A	2	162	P	74	P	2	105	P	100	A	1	Homo sapiens NADH dehydrogenase (ubiquinone) Fe-S protein 1 (75kD) (NADH-coenzyme Q reductase) (NDUFS1), mRNA.
203040_s_at	hydroxymethylbilane synthase	HMBS	167	P	248	P	1	420	P	571	P	1	142	P	446	P	0	Homo sapiens hydroxymethylbilane synthase (HMBS), mRNA.
203043_at	Ac-like transposable element	ALTE	54	A	42	A	1	63	A	34	A	2	198	P	60	A	3	Homo sapiens Ac-like transposable element (ALTE), mRNA.
203045_at	ninjurin 1	NINJ1	163	M	339	A	0	133	A	94	A	1	390	P	242	A	2	Homo sapiens ninjurin 1 (NINJ1), mRNA.
203046_s_at	timeless homolog (Drosophila)	TIMELESS	123	P	106	P	1	76	P	145	A	1	123	P	87	A	1	Homo sapiens timeless (Drosophila) homolog (TIMELESS), mRNA.
203050_at	tumor protein p53 binding protein, 1	TP53BP1	160	A	27	A	6	133	A	60	A	2	135	A	71	A	2	Homo sapiens tumor protein p53-binding protein, 1 (TP53BP1), mRNA.
203052_at	complement component 2	C2	79	P	184	P	0	72	A	114	A	1	54	M	175	A	0	Homo sapiens complement component 2 (C2), mRNA.
203053_at	breast carcinoma amplified sequence 2	BCAS2	160	P	171	P	1	216	P	134	P	2	140	P	156	A	1	Homo sapiens breast carcinoma amplified sequence 2 (BCAS2), mRNA.
203054_s_at	T-cell leukemia translocation altered gene	TCTA	271	P	266	P	1	337	P	190	A	2	265	P	254	A	1	Homo sapiens T-cell leukemia translocation altered gene (TCTA), mRNA.
203055_s_at	Rho guanine nucleotide exchange factor (GEF) 1	ARHGEF1	77	A	199	A	0	109	A	154	A	1	121	A	334	A	0	Homo sapiens Rho guanine nucleotide exchange factor (GEF) 1 (ARHGEF1), mRNA.
203057_s_at	PR domain containing 2, with ZNF domain	PRDM2	102	P	178	P	1	107	A	133	A	1	138	P	107	M	1	EST
203058_s_at	3'-phosphoadenosine 5'-phosphosulfate synthase 2	PAPSS2	150	P	67	A	2	83	P	81	A	1	44	P	63	A	1	EST
203064_s_at	interleukin enhancer binding factor 1	ILF1	278	P	217	P	1	188	P	226	P	1	207	P	168	A	1	Homo sapiens interleukin enhancer binding factor 1 (ILF1), mRNA.
203065_s_at	caveolin 1, caveolae protein, 22kDa	CAV1	6	A	26	A	0	7	A	39	A	0	9	A	35	A	0	Homo sapiens caveolin 1, caveolae protein, 22kD (CAV1), mRNA.
203067_at	E3-binding protein	PDX1	141	P	74	A	2	151	P	66	P	2	182	P	75	M	2	Homo sapiens Pyruvate dehydrogenase complex, lipoyl-containing component X; E3-binding protein (PDX1), mRNA.
203071_at	sema domain, immunoglobulin domain (Ig), short basic domain, secreted, (semaphorin) 3B	SEMA3B	50	A	7	A	7	4	A	5	A	1	4	A	18	A	0	Homo sapiens sema domain, immunoglobulin domain (Ig), short basic domain, secreted, (semaphorin) 3B (SEMA3B), mRNA.
203072_at	myosin IE	MYO1E	37	A	82	A	0	66	A	4	A	18	51	A	7	A	7	Homo sapiens myosin IC (MYO1C), mRNA.
203073_at	component of oligomeric golgi complex 2	COG2	280	P	140	P	2	173	P	71	A	2	175	P	206	P	1	Homo sapiens low density lipoprotein receptor defect C complementing (LDLC), mRNA.
203074_at	annexin A8	ANXA8	92	P	154	P	1	137	P	332	P	0	104	P	158	A	1	Homo sapiens annexin A8 (ANXA8), mRNA.
203075_at	MAD, mothers against decapentaplegic homolog 2 (Drosophila)	MADH2	355	P	322	P	1	427	P	315	P	1	624	P	326	P	2	EST
203078_at	cullin 2	CUL2	37	P	44	A	1	22	A	26	A	1	20	M	20	A	1	Human CUL-2 (cul-2) mRNA, complete cds.
203080_s_at	bromodomain adjacent to zinc finger domain, 2B	BAZ2B	81	P	246	P	0	83	P	106	P	1	191	P	80	P	2	Homo sapiens bromodomain adjacent to zinc finger domain, 2B (BAZ2B), mRNA.
203081_at	catenin, beta interacting protein 1	CTNNBIP1	14	A	104	A	0	25	A	60	A	0	37	P	40	A	1	Homo sapiens beta-catenin-interacting protein ICAT (LOC56998), mRNA.
203083_at	thrombospondin 2	THBS2	24	A	15	A	2	32	A	52	A	1	16	A	74	A	0	Homo sapiens thrombospondin 2 (THBS2), mRNA.
203085_s_at	transforming growth factor, beta 1 (Camurati-Engelmann disease)	TGFB1	14	A	5	A	3	6	A	53	A	0	42	A	9	A	5	Homo sapiens, Similar to transforming growth factor, beta 1, clone MGC:3119, mRNA, complete cds.
203087_s_at	kinesin heavy chain member 2	KIF2	69	P	139	P	0	90	P	84	P	1	146	P	79	P	2	Homo sapiens kinesin heavy chain member 2 (KIF2), mRNA.
203088_at	fibulin 5	FBLN5	15	A	10	A	2	9	A	58	A	0	8	A	20	A	0	Homo sapiens fibulin 5 (FBLN5), mRNA.
203090_at	stromal cell-derived factor 2	SDF2	244	P	207	A	1	168	P	207	A	1	163	P	265	A	1	Homo sapiens stromal cell-derived factor 2 (SDF2), mRNA.
203091_at	far upstream element (FUSE) binding protein 1	FUBP1	63	A	49	A	1	47	A	85	A	1	84	A	90	A	1	Homo sapiens far upstream element (FUSE) binding protein 1 (FUBP1), mRNA.
203093_s_at	translocase of inner mitochondrial membrane 44 homolog (yeast)	TIMM44	49	A	16	A	3	96	M	78	A	1	19	A	81	A	0	Homo sapiens translocase of inner mitochondrial membrane 44 (yeast) homolog (TIM44), mRNA.
203095_at	mitochondrial translational initiation factor 2	MTIF2	526	P	199	P	3	213	P	112	A	2	290	P	84	A	3	Homo sapiens mitochondrial translational initiation factor 2 (MTIF2), nuclear gene encoding mitochondrial protein, mRNA.
203097_s_at	PDZ domain containing guanine nucleotide exchange factor(GEF)1	PDZ-GEF1	111	P	237	P	0	346	P	315	P	1	509	P	419	P	1	Homo sapiens PDZ domain containing guanine nucleotide exchange factor(GEF)1 (PDZ-GEF1), mRNA.
203098_at	chromodomain protein, Y chromosome-like	CDYL	156	P	67	A	2	90	A	19	A	5	102	P	30	A	3	Homo sapiens mRNA; cDNA DKFZp586C1622 (from clone DKFZp586C1622); partial cds.
203102_s_at	mannosyl (alpha-1,6-)-glycoprotein beta-1,2-N-acetylglucosaminyltransferase	MGAT2	60	P	27	A	2	29	A	23	A	1	54	P	10	A	5	Homo sapiens mannosyl (alpha-1,6-)-glycoprotein beta-1,2-N-acetylglucosaminyltransferase (MGAT2), mRNA.
203103_s_at	nuclear matrix protein NMP200 related to splicing factor PRP19	NMP200	442	P	182	A	2	172	A	66	A	3	120	A	143	A	1	Homo sapiens nuclear matrix protein NMP200 related to splicing factor PRP19 (NMP200), mRNA.
203104_at	colony stimulating factor 1 receptor, formerly McDonough feline sarcoma viral (v-fms) oncogene homolog	CSF1R	82	A	381	P	0	103	A	337	P	0	374	P	348	P	1	Homo sapiens colony stimulating factor 1 receptor, formerly McDonough feline sarcoma viral (v-fms) oncogene homolog (CSF1R), mRNA.
203105_s_at	dynamin 1-like	DNM1L	28	M	10	A	3	57	P	84	A	1	85	P	26	A	3	Homo sapiens dynamin 1-like (DNM1L), transcript variant 1, mRNA.
203108_at	retinoic acid induced 3	RAI3	1099	P	11	A	102	10	A	10	A	1	258	P	14	A	18	Homo sapiens retinoic acid induced 3 (RAI3), mRNA.
203109_at	ubiquitin-conjugating enzyme E2M (UBC12 homolog, yeast)	UBE2M	40	A	20	A	2	74	A	26	A	3	8	A	25	A	0	Homo sapiens ubiquitin-conjugating enzyme E2M (homologous to yeast UBC12) (UBE2M), mRNA.
203110_at	PTK2B protein tyrosine kinase 2 beta	PTK2B	53	A	453	P	0	85	A	284	A	0	214	P	250	P	1	Human cell adhesion kinase beta (CAKbeta) mRNA, complete cds.
203113_s_at	eukaryotic translation elongation factor 1 delta (guanine nucleotide exchange protein)	EEF1D	3994	P	329	P	12	2128	P	444	P	5	860	P	396	P	2	Homo sapiens eukaryotic translation elongation factor 1 delta (guanine nucleotide exchange protein) (EEF1D), mRNA.
203114_at	Sjogren's syndrome/scleroderma autoantigen 1	SSSCA1	58	A	4	A	13	121	A	18	A	7	41	A	8	A	5	Homo sapiens Sjogrens syndromescleroderma autoantigen 1 (SSSCA1), mRNA.
203116_s_at	ferrochelatase (protoporphyria)	FECH	59	A	209	M	0	328	P	2413	P	0	194	P	767	P	0	Homo sapiens ferrochelatase (protoporphyria) (FECH), nuclear gene encoding mitochondrial protein, mRNA.
203118_at	proprotein convertase subtilisin/kexin type 7	PCSK7	51	A	138	A	0	105	A	197	A	1	149	A	183	A	1	Homo sapiens proprotein convertase subtilisinkexin type 7 (PCSK7), mRNA.
203120_at	tumor protein p53 binding protein, 2	TP53BP2	55	P	34	A	2	114	P	16	A	7	60	P	35	A	2	Homo sapiens tumor protein p53-binding protein, 2 (TP53BP2), mRNA.
203123_s_at	solute carrier family 11 (proton-coupled divalent metal ion transporters), member 2	SLC11A2	121	P	150	P	1	108	P	119	A	1	46	A	90	A	1	EST
203126_at	inositol(myo)-1(or 4)-monophosphatase 2	IMPA2	38	A	152	A	0	158	A	221	A	1	330	P	358	P	1	Homo sapiens inositol(myo)-1(or 4)-monophosphatase 2 (IMPA2), mRNA.
203130_s_at	kinesin family member 5C	KIF5C	713	P	113	A	6	647	P	76	A	8	50	A	116	A	0	Homo sapiens kinesin family member 5C (KIF5C), mRNA.
203131_at	platelet-derived growth factor receptor, alpha polypeptide	PDGFRA	50	A	12	A	4	26	A	56	A	0	33	A	55	A	1	Homo sapiens platelet-derived growth factor receptor, alpha polypeptide (PDGFRA), mRNA.
203132_at	retinoblastoma 1 (including osteosarcoma)	RB1	361	P	525	P	1	98	P	54	P	2	146	P	98	P	1	Homo sapiens retinoblastoma 1 (including osteosarcoma) (RB1), mRNA.
203133_at	protein translocation complex beta	SEC61B	1544	P	766	P	2	2438	P	754	P	3	788	P	743	P	1	Homo sapiens protein translocation complex beta (SEC61B), mRNA.
203135_at	TATA box binding protein	TBP	201	P	106	A	2	133	P	161	A	1	157	P	50	A	3	Homo sapiens TATA box binding protein (TBP), mRNA.
203136_at	Rab acceptor 1 (prenylated)	RABAC1	695	P	259	P	3	708	P	296	P	2	197	P	333	P	1	Homo sapiens Rab acceptor 1 (prenylated) (RABAC1), mRNA.
203138_at	histone acetyltransferase 1	HAT1	117	P	64	P	2	160	P	75	P	2	118	P	130	P	1	Homo sapiens histone acetyltransferase 1 (HAT1), mRNA.
203139_at	death-associated protein kinase 1	DAPK1	59	A	226	P	0	118	P	175	A	1	512	P	252	M	2	Homo sapiens death-associated protein kinase 1 (DAPK1), mRNA.
203140_at	B-cell CLL/lymphoma 6 (zinc finger protein 51)	BCL6	360	P	1772	P	0	163	P	743	P	0	1188	P	1159	P	1	Homo sapiens B-cell CLLlymphoma 6 (zinc finger protein 51) (BCL6), mRNA.
203142_s_at	adaptor-related protein complex 3, beta 1 subunit	AP3B1	147	P	113	A	1	149	P	294	A	1	146	P	216	P	1	Homo sapiens adaptor-related protein complex 3, beta 1 subunit (AP3B1), mRNA.
203145_at	sperm associated antigen 5	SPAG5	84	P	53	A	2	91	A	53	A	2	53	P	51	A	1	Homo sapiens mitotic spindle coiled-coil related protein (DEEPEST), mRNA.
203146_s_at	gamma-aminobutyric acid (GABA) B receptor, 1	GABBR1	62	A	156	A	0	39	A	110	A	0	176	A	71	A	2	Homo sapiens gamma-aminobutyric acid (GABA) B receptor, 1 (GABBR1), transcript variant 1, mRNA.
203149_at	poliovirus receptor-related 2 (herpesvirus entry mediator B)	PVRL2	117	A	190	P	1	150	A	94	A	2	61	A	239	A	0	Homo sapiens poliovirus receptor-related 2 (herpesvirus entry mediator B) (PVRL2), mRNA.
203150_at	Rab9 effector p40	RAB9P40	114	P	100	A	1	128	P	54	A	2	132	P	210	A	1	Homo sapiens Rab9 effector p40 (RAB9P40), mRNA.
203151_at	microtubule-associated protein 1A	MAP1A	90	A	181	A	0	175	P	233	A	1	119	P	237	A	1	EST
203152_at	mitochondrial ribosomal protein L40	MRPL40	167	P	14	A	12	397	P	71	A	6	197	P	78	A	3	Homo sapiens nuclear localization signal deleted in velocardiofacial syndrome (NLVCF), mRNA.
203153_at	interferon-induced protein with tetratricopeptide repeats 1	IFIT1	733	P	2852	P	0	50	A	194	A	0	179	P	335	A	1	Homo sapiens interferon-induced protein with tetratricopeptide repeats 1 (IFIT1), mRNA.
203155_at	SET domain, bifurcated 1	SETDB1	126	P	131	A	1	88	P	8	A	12	267	P	31	A	9	Homo sapiens SET domain, bifurcated 1 (SETDB1), mRNA.
203156_at	A kinase (PRKA) anchor protein 11	AKAP11	80	P	64	P	1	31	P	55	A	1	89	P	72	P	1	Homo sapiens A-kinase anchoring protein 220 (LOC51707), mRNA.
203160_s_at	ring finger protein (C3HC4 type) 8	RNF8	109	P	86	A	1	84	A	154	A	1	96	P	90	A	1	Homo sapiens cDNA FLJ12013 fis, clone HEMBB1001673, highly similar to Homo sapiens gene for new zinc finger protein.
203162_s_at	katanin p80 (WD40-containing) subunit B 1	KATNB1	118	P	329	P	0	133	P	206	P	1	365	P	284	P	1	Homo sapiens katanin p80 (WD40-containing) subunit B 1 (KATNB1), mRNA.
203164_at	solute carrier family 33 (acetyl-CoA transporter), member 1	SLC33A1	148	P	80	P	2	102	P	90	M	1	150	P	85	P	2	EST
203166_at	craniofacial development protein 1	CFDP1	238	P	176	A	1	175	P	153	A	1	185	P	164	A	1	Homo sapiens craniofacial development protein 1 (CFDP1), mRNA.
203167_at	tissue inhibitor of metalloproteinase 2	TIMP2	8	A	192	M	0	13	A	58	A	0	454	P	85	A	5	Homo sapiens tissue inhibitor of metalloproteinase 2 (TIMP2), mRNA.
203168_at	cAMP responsive element binding protein-like 1	CREBL1	120	A	95	A	1	17	A	197	A	0	150	P	87	A	2	Homo sapiens cAMP responsive element binding protein-like 1 (CREBL1), mRNA.
203174_s_at	ADP-ribosylation factor related protein 1	ARFRP1	118	A	138	A	1	67	A	268	A	0	52	A	220	A	0	Homo sapiens ADP-ribosylation factor related protein 1 (ARFRP1), mRNA.
203175_at	ras homolog gene family, member G (rho G)	ARHG	303	P	1606	P	0	250	P	575	P	0	1509	P	1183	P	1	Homo sapiens ras homolog gene family, member G (rho G) (ARHG), mRNA.
203176_s_at	transcription factor A, mitochondrial	TFAM	105	P	63	A	2	119	P	102	A	1	21	A	131	A	0	EST
203179_at	galactose-1-phosphate uridylyltransferase	GALT	130	P	236	P	1	94	A	200	P	0	118	P	254	P	0	Homo sapiens galactose-1-phosphate uridylyltransferase (GALT), mRNA.
203180_at	aldehyde dehydrogenase 1 family, member A3	ALDH1A3	6	A	10	A	1	251	P	7	A	34	2	A	5	A	0	Homo sapiens aldehyde dehydrogenase 1 family, member A3 (ALDH1A3), mRNA.
203182_s_at	SFRS protein kinase 2	SRPK2	81	P	145	P	1	87	P	144	P	1	104	P	164	P	1	Homo sapiens SFRS protein kinase 2 (SRPK2), mRNA.
203183_s_at	SWI/SNF related, matrix associated, actin dependent regulator of chromatin, subfamily d, member 1	SMARCD1	52	A	91	P	1	92	M	83	P	1	36	A	155	A	0	Homo sapiens SWISNF related, matrix associated, actin dependent regulator of chromatin, subfamily d, member 1 (SMARCD1), mRNA.
203184_at	fibrillin 2 (congenital contractural arachnodactyly)	FBN2	30	P	55	A	1	40	A	45	A	1	97	P	122	P	1	Homo sapiens fibrillin 2 (congenital contractural arachnodactyly) (FBN2), mRNA.
203185_at	Ras association (RalGDS/AF-6) domain family 2	RASSF2	77	P	564	P	0	176	P	423	P	0	590	P	764	P	1	Homo sapiens Ras association (RalGDSAF-6) domain family 2 (RASSF2), mRNA.
203186_s_at	S100 calcium binding protein A4 (calcium protein, calvasculin, metastasin, murine placental homolog)	S100A4	150	P	862	P	0	298	P	1041	P	0	1507	P	1153	P	1	Homo sapiens S100 calcium-binding protein A4 (calcium protein, calvasculin, metastasin, murine placental homolog) (S100A4), transcript variant 1, mRNA.
203187_at	dedicator of cyto-kinesis 1	DOCK1	49	P	128	A	0	122	P	209	A	1	74	A	153	A	0	Homo sapiens dedicator of cyto-kinesis 1 (DOCK1), mRNA.
203188_at	UDP-GlcNAc:betaGal beta-1,3-N-acetylglucosaminyltransferase 6	B3GNT6	65	P	95	A	1	107	A	218	P	0	72	A	200	A	0	Homo sapiens i-beta-1,3-N-acetylglucosaminyltransferase (BETA3GNTI), mRNA.
203190_at	NADH dehydrogenase (ubiquinone) Fe-S protein 8, 23kDa (NADH-coenzyme Q reductase)	NDUFS8	303	P	87	A	3	594	P	121	A	5	199	P	67	A	3	Homo sapiens NADH dehydrogenase (ubiquinone) Fe-S protein 8 (23kD) (NADH-coenzyme Q reductase) (NDUFS8), mRNA.
203192_at	ATP-binding cassette, sub-family B (MDR/TAP), member 6	ABCB6	93	A	27	A	3	154	A	119	A	1	25	A	117	A	0	Homo sapiens ATP-binding cassette, sub-family B (MDRTAP), member 6 (ABCB6), nuclear gene encoding mitochondrial protein, mRNA.
203196_at	ATP-binding cassette, sub-family C (CFTR/MRP), member 4	ABCC4	27	A	87	A	0	181	P	79	P	2	40	M	105	P	0	EST
203198_at	cyclin-dependent kinase 9 (CDC2-related kinase)	CDK9	8	A	20	A	0	24	A	9	A	3	5	A	16	A	0	Homo sapiens cyclin-dependent kinase 9 (CDC2-related kinase) (CDK9), mRNA.
203200_s_at	5-methyltetrahydrofolate-homocysteine methyltransferase reductase	MTRR	344	P	154	P	2	158	P	191	P	1	119	P	158	P	1	Homo sapiens 5-methyltetrahydrofolate-homocysteine methyltransferase reductase (MTRR), transcript variant 2, mRNA.
203201_at	phosphomannomutase 2	PMM2	86	P	42	A	2	45	A	40	A	1	64	P	12	A	5	Homo sapiens phosphomannomutase 2 (PMM2), mRNA.
203202_at	HIV-1 rev binding protein 2	HRB2	224	P	90	P	2	157	P	43	A	4	54	P	48	A	1	EST
203209_at	replication factor C (activator 1) 5, 36.5kDa	RFC5	142	P	80	A	2	57	A	81	P	1	76	P	80	M	1	Homo sapiens, replication factor C (activator 1) 5 (36.5kD), clone MGC:1155, mRNA, complete cds.
203213_at	cell division cycle 2, G1 to S and G2 to M	CDC2	110	P	43	A	3	48	P	12	A	4	32	A	20	A	2	EST
203216_s_at	myosin VI	MYO6	674	P	8	A	80	176	P	7	A	25	38	P	29	A	1	Homo sapiens myosin VI (MYO6), mRNA.
203217_s_at	sialyltransferase 9 (CMP-NeuAc:lactosylceramide alpha-2,3-sialyltransferase; GM3 synthase)	SIAT9	168	P	344	P	0	93	P	219	P	0	253	P	118	A	2	Homo sapiens sialyltransferase 9 (CMP-NeuAc:lactosylceramide alpha-2,3-sialyltransferase; GM3 synthase) (SIAT9), mRNA.
203218_at	mitogen-activated protein kinase 9	MAPK9	171	P	85	A	2	92	A	10	A	10	158	P	12	A	14	EST
203221_at	transducin-like enhancer of split 1 (E(sp1) homolog, Drosophila)	TLE1	344	P	168	P	2	464	P	183	P	3	118	P	169	P	1	EST
203226_s_at	sarcoma amplified sequence	SAS	91	A	115	A	1	92	A	103	A	1	89	A	181	A	0	EST
203228_at	platelet-activating factor acetylhydrolase, isoform Ib, gamma subunit 29kDa	PAFAH1B3	192	A	6	A	30	283	A	68	A	4	45	A	32	A	1	Homo sapiens platelet-activating factor acetylhydrolase, isoform Ib, gamma subunit (29kD) (PAFAH1B3), mRNA.
203229_s_at	CDC-like kinase 2	CLK2	245	M	118	A	2	123	A	98	A	1	151	A	52	A	3	Homo sapiens CDC-like kinase 2 (CLK2), transcript variant phclk2, mRNA.
203230_at	dishevelled, dsh homolog 1 (Drosophila)	DVL1	57	A	113	P	1	106	P	76	A	1	78	P	112	M	1	Homo sapiens dishevelled 1 (DVL1) mRNA, complete cds.
203232_s_at	spinocerebellar ataxia 1 (olivopontocerebellar ataxia 1, autosomal dominant, ataxin 1)	SCA1	219	P	129	P	2	93	P	173	P	1	210	P	150	P	1	Homo sapiens spinocerebellar ataxia 1 (olivopontocerebellar ataxia 1, autosomal dominant, ataxin 1) (SCA1), mRNA.
203233_at	interleukin 4 receptor	IL4R	134	A	206	A	1	146	A	209	A	1	521	P	378	M	1	Homo sapiens interleukin 4 receptor (IL4R), mRNA.
203234_at	uridine phosphorylase	UP	56	P	305	P	0	92	A	248	M	0	619	P	476	P	1	Homo sapiens uridine phosphorylase (UP), mRNA.
203235_at	thimet oligopeptidase 1	THOP1	50	A	7	A	7	63	M	57	A	1	38	A	114	A	0	Homo sapiens thimet oligopeptidase 1 (THOP1), mRNA.
203236_s_at	lectin, galactoside-binding, soluble, 9 (galectin 9)	LGALS9	112	P	172	P	1	46	A	118	A	0	106	P	165	P	1	Homo sapiens lectin, galactoside-binding, soluble, 9 (galectin 9) (LGALS9), transcript variant long, mRNA.
203238_s_at	Notch homolog 3 (Drosophila)	NOTCH3	64	P	58	A	1	77	A	28	A	3	18	A	85	A	0	Homo sapiens Notch (Drosophila) homolog 3 (NOTCH3), mRNA.
203239_s_at	CCR4-NOT transcription complex, subunit 3	CNOT3	11	A	35	A	0	17	A	63	M	0	11	A	66	A	0	Homo sapiens CCR4-NOT transcription complex, subunit 3 (CNOT3), mRNA.
203240_at	Fc fragment of IgG binding protein	FCGBP	57	A	72	A	1	6	A	19	A	0	46	A	21	A	2	Homo sapiens IgG Fc binding protein (FC(GAMMA)BP) mRNA.
203241_at	UV radiation resistance associated gene	UVRAG	166	P	79	P	2	43	P	150	A	0	187	P	145	M	1	Homo sapiens UV radiation resistance associated gene (UVRAG), mRNA.
203243_s_at	LIM protein (similar to rat protein kinase C-binding enigma)	LIM	8	A	74	P	0	641	P	35	A	19	9	A	28	A	0	Homo sapiens LIM protein (similar to rat protein kinase C-binding enigma) (LIM), mRNA.
203244_at	peroxisome receptor 1	PXR1	106	P	78	A	1	106	P	105	A	1	136	P	108	A	1	Homo sapiens peroxisome receptor 1 (PXR1), mRNA.
203245_s_at	FLJ35348	FLJ35348	56	A	18	A	3	64	A	63	A	1	41	A	13	A	3	Homo sapiens, homologous to yeast nitrogen permease (candidate tumor suppressor), clone MGC:3527, mRNA, complete cds.
203247_s_at	zinc finger protein 24 (KOX 17)	ZNF24	152	P	215	P	1	259	P	254	A	1	71	P	252	P	0	Homo sapiens, zinc finger protein 24 (KOX 17), clone MGC:2057, mRNA, complete cds.
203252_at	tumor suppressor deleted in oral cancer-related 1	DOC-1R	100	P	56	A	2	164	M	103	A	2	99	P	64	A	2	Homo sapiens tumor suppressor deleted in oral cancer-related 1 (DOC-1R), mRNA.
203254_s_at	talin 1	TLN1	48	A	79	A	1	17	A	63	A	0	44	A	61	A	1	Homo sapiens talin (TLN), mRNA.
203256_at	cadherin 3, type 1, P-cadherin (placental)	CDH3	176	A	9	A	20	3	A	16	A	0	6	A	12	A	0	Homo sapiens cadherin 3, type 1, P-cadherin (placental) (CDH3), mRNA.
203258_at	DR1-associated protein 1 (negative cofactor 2 alpha)	DRAP1	71	P	107	P	1	42	A	12	A	4	10	A	12	A	1	Homo sapiens DR1-associated protein 1 (negative cofactor 2 alpha) (DRAP1), mRNA.
203261_at	likely ortholog of mouse dynactin 6	DCTN6	96	M	81	A	1	186	P	150	A	1	115	A	106	A	1	Homo sapiens novel RGD-containing protein (WS-3), mRNA.
203262_s_at	DNA segment on chromosome X (unique) 9928 expressed sequence	DXS9928E	233	P	120	A	2	362	P	80	A	5	568	P	153	A	4	Homo sapiens DNA segment on chromosome X (unique) 9928 expressed sequence (DXS9928E), mRNA.
203266_s_at	mitogen-activated protein kinase kinase 4	MAP2K4	59	P	72	M	1	85	P	84	P	1	117	P	113	P	1	Homo sapiens mitogen-activated protein kinase kinase 4 (MAP2K4), mRNA.
203267_s_at	developmentally regulated GTP binding protein 2	DRG2	19	A	7	A	3	13	A	9	A	1	11	A	6	A	2	EST
203269_at	neutral sphingomyelinase (N-SMase) activation associated factor	NSMAF	339	P	366	P	1	218	P	184	P	1	212	P	229	P	1	Homo sapiens neutral sphingomyelinase (N-SMase) activation associated factor (NSMAF), mRNA.
203270_at	deoxythymidylate kinase (thymidylate kinase)	DTYMK	85	A	13	A	7	12	A	12	A	1	40	A	18	A	2	Homo sapiens deoxythymidylate kinase (thymidylate kinase) (DTYMK), mRNA.
203271_s_at	unc-119 homolog (C. elegans)	UNC119	89	A	51	A	2	19	A	30	A	1	94	A	58	A	2	Homo sapiens unc119 (C.elegans) homolog (UNC119), mRNA.
203273_s_at	lung cancer candidate	FUS1	102	P	122	A	1	82	M	68	A	1	52	P	212	P	0	Homo sapiens lung cancer candidate (FUS1), mRNA.
203274_at	coagulation factor VIII-associated (intronic transcript)	F8A	192	P	259	P	1	206	P	306	P	1	354	P	261	P	1	Homo sapiens coagulation factor VIII-associated (intronic transcript) (F8A), mRNA.
203275_at	interferon regulatory factor 2	IRF2	27	A	207	P	0	67	P	175	P	0	131	P	158	A	1	Homo sapiens interferon regulatory factor 2 (IRF2), mRNA.
203276_at	lamin B1	LMNB1	24	P	219	P	0	23	A	170	P	0	19	A	146	P	0	Homo sapiens lamin B1 (LMNB1), mRNA.
203277_at	DNA fragmentation factor, 45kDa, alpha polypeptide	DFFA	99	P	38	A	3	54	A	24	A	2	78	A	80	A	1	Homo sapiens DNA fragmentation factor, 45 kD, alpha polypeptide (DFFA), mRNA.
203282_at	glucan (1,4-alpha-), branching enzyme 1 (glycogen branching enzyme, Andersen disease, glycogen storage disease type IV)	GBE1	97	P	243	A	0	116	P	129	A	1	139	P	131	P	1	Homo sapiens glucan (1,4-alpha-), branching enzyme 1 (glycogen branching enzyme, Andersen disease, glycogen storage disease type IV) (GBE1), mRNA.
203284_s_at	heparan sulfate 2-O-sulfotransferase 1	HS2ST1	125	P	55	A	2	38	P	20	A	2	56	P	39	A	1	EST
203287_at	ladinin 1	LAD1	313	P	150	A	2	198	M	175	A	1	144	A	190	A	1	Homo sapiens ladinin 1 (LAD1), mRNA.
203289_s_at	Conserved gene telomeric to alpha globin cluster	CGTHBA	9	A	82	A	0	5	A	45	A	0	6	A	36	A	0	EST
203291_at	CCR4-NOT transcription complex, subunit 4	CNOT4	61	P	82	A	1	127	A	67	A	2	44	P	51	A	1	Homo sapiens CCR4-NOT transcription complex, subunit 4 (CNOT4), mRNA.
203292_s_at	vacuolar protein sorting 11 (yeast)	VPS11	193	M	245	A	1	178	M	244	A	1	273	P	266	P	1	Homo sapiens vacuolar protein sorting 11 (yeast homolog) (VPS11), mRNA.
203293_s_at	lectin, mannose-binding, 1	LMAN1	9	A	6	A	1	8	A	30	A	0	12	A	9	A	1	Homo sapiens lectin, mannose-binding, 1 (LMAN1), mRNA.
203296_s_at	ATPase, Na+/K+ transporting, alpha 2 (+) polypeptide	ATP1A2	23	A	20	A	1	16	A	6	A	3	13	P	40	A	0	Homo sapiens ATPase, Na+K+ transporting, alpha 2 (+) polypeptide (ATP1A2), mRNA.
203297_s_at	jumonji homolog (mouse)	JMJ	1010	P	517	P	2	362	P	388	P	1	1049	P	515	P	2	EST
203299_s_at	adaptor-related protein complex 1, sigma 2 subunit	AP1S2	85	A	257	A	0	104	A	265	M	0	215	P	300	A	1	Homo sapiens DC22 mRNA, complete cds.
203301_s_at	cyclin D binding myb-like transcription factor 1	DMTF1	199	P	205	P	1	110	A	163	A	1	124	P	120	A	1	Homo sapiens cyclin D binding Myb-like transcription factor 1 (DMTF), mRNA.
203302_at	deoxycytidine kinase	DCK	40	P	72	P	1	62	P	106	P	1	52	P	74	P	1	Homo sapiens deoxycytidine kinase (DCK), mRNA.
203303_at	t-complex-associated-testis-expressed 1-like	TCTE1L	459	P	217	P	2	416	P	239	P	2	227	P	169	P	1	Homo sapiens t-complex-associated-testis-expressed 1-like (TCTE1L), mRNA.
203304_at	putative transmembrane protein	NMA	1040	P	128	P	8	141	P	74	A	2	53	P	41	A	1	Homo sapiens putative transmembrane protein (NMA), mRNA.
203305_at	coagulation factor XIII, A1 polypeptide	F13A1	75	P	1067	P	0	265	P	1241	P	0	1736	P	1194	P	1	Homo sapiens coagulation factor XIII, A1 polypeptide (F13A1), mRNA.
203306_s_at	solute carrier family 35 (CMP-sialic acid transporter), member 1	SLC35A1	344	P	264	P	1	159	P	152	P	1	366	P	223	P	2	Homo sapiens solute carrier family 35 (CMP-sialic acid transporter), member 1 (SLC35A1), mRNA.
203307_at	guanine nucleotide binding protein-like 1	GNL1	66	P	137	A	0	54	A	118	A	0	70	A	115	A	1	Homo sapiens guanine nucleotide binding protein-like 1 (GNL1), mRNA.
203309_s_at	Hermansky-Pudlak syndrome 1	HPS1	106	P	188	P	1	97	P	304	P	0	110	P	385	P	0	Homo sapiens Hermansky-Pudlak syndrome (HPS), mRNA.
203310_at	syntaxin binding protein 3	STXBP3	114	P	211	P	1	97	P	100	P	1	137	P	149	P	1	Homo sapiens syntaxin binding protein 3 (STXBP3), mRNA.
203313_s_at	TGFB-induced factor (TALE family homeobox)	TGIF	74	P	19	A	4	114	P	79	A	1	31	P	58	A	1	Homo sapiens TG-interacting factor (TALE family homeobox) (TGIF), mRNA.
203314_at	Pseudoautosomal GTP-binding protein-like	PGPL	217	P	97	A	2	196	P	102	P	2	154	P	92	A	2	Homo sapiens Pseudoautosomal GTP-binding protein-like (PGPL), mRNA.
203315_at	NCK adaptor protein 2	NCK2	204	A	692	M	0	231	A	433	A	1	403	P	295	A	1	Homo sapiens, NCK adaptor protein 2, clone MGC:1698, mRNA, complete cds.
203316_s_at	small nuclear ribonucleoprotein polypeptide E	SNRPE	906	P	208	P	4	791	P	103	P	8	332	P	95	P	3	Homo sapiens small nuclear ribonucleoprotein polypeptide E (SNRPE), mRNA.
203317_at	SEC7 homolog	TIC	45	P	154	P	0	63	P	75	A	1	267	P	88	P	3	Homo sapiens SEC7 homolog (TIC), mRNA.
203319_s_at	zinc finger protein 148 (pHZ-52)	ZNF148	60	P	47	P	1	82	P	74	P	1	31	P	31	A	1	Human CACCC box-binding protein mRNA, complete cds.
203320_at	lymphocyte adaptor protein	LNK	69	P	395	P	0	89	P	312	P	0	556	P	242	P	2	Homo sapiens lymphocyte adaptor protein (LNK), mRNA.
203323_at	Homo sapiens cDNA: FLJ20860 fis, clone ADKA01632.		70	P	68	P	1	32	P	33	A	1	24	A	30	P	1	EST
203325_s_at	collagen, type V, alpha 1	COL5A1	4	A	7	A	1	3	A	10	A	0	3	A	62	A	0	EST
203327_at	insulin-degrading enzyme	IDE	165	P	71	A	2	242	P	64	A	4	139	P	84	A	2	EST
203329_at	protein tyrosine phosphatase, receptor type, M	PTPRM	35	A	61	M	1	56	A	112	P	1	47	A	87	P	1	Homo sapiens protein tyrosine phosphatase, receptor type, M (PTPRM), mRNA.
203330_s_at	syntaxin 5A	STX5A	35	A	39	A	1	37	A	59	A	1	27	A	52	A	1	Homo sapiens syntaxin 5A (STX5A), mRNA.
203332_s_at	inositol polyphosphate-5-phosphatase, 145kDa	INPP5D	112	A	567	P	0	151	P	349	P	0	422	P	278	P	2	Homo sapiens inositol polyphosphate-5-phosphatase, 145kD (INPP5D), mRNA.
203333_at	kinesin-associated protein 3	KIFAP3	52	A	25	A	2	66	A	15	A	4	31	A	23	A	1	Homo sapiens smg GDS-ASSOCIATED PROTEIN (SMAP), mRNA.
203334_at	DEAD/H (Asp-Glu-Ala-Asp/His) box polypeptide 8 (RNA helicase)	DDX8	79	A	18	A	4	11	A	5	A	2	84	A	18	A	5	Homo sapiens DEADH (Asp-Glu-Ala-AspHis) box polypeptide 8 (RNA helicase) (DDX8), mRNA.
203335_at	phytanoyl-CoA hydroxylase (Refsum disease)	PHYH	129	P	49	A	3	322	P	84	P	4	104	P	63	P	2	Homo sapiens phytanoyl-CoA hydroxylase (Refsum disease) (PHYH), mRNA.
203336_s_at	integrin cytoplasmic domain-associated protein 1	ICAP-1A	111	P	81	A	1	193	P	80	P	2	245	P	116	P	2	EST
203338_at	protein phosphatase 2, regulatory subunit B (B56), epsilon isoform	PPP2R5E	71	P	96	P	1	82	P	126	P	1	80	P	81	P	1	Homo sapiens protein phosphatase 2, regulatory subunit B (B56), epsilon isoform (PPP2R5E), mRNA.
203340_s_at	solute carrier family 25 (mitochondrial carrier, Aralar), member 12	SLC25A12	67	P	61	A	1	44	A	54	A	1	74	M	107	A	1	Homo sapiens solute carrier family 25 (mitochondrial carrier, Aralar), member 12 (SLC25A12), mRNA.
203341_at	CCAAT-box-binding transcription factor	CBF2	155	P	50	A	3	112	P	87	A	1	153	P	64	A	2	Homo sapiens CCAAT-box-binding transcription factor (CBF2), mRNA.
203342_at	translocase of inner mitochondrial membrane 17 homolog B (yeast)	TIMM17B	242	P	145	A	2	227	P	189	A	1	42	A	201	A	0	Homo sapiens translocase of inner mitochondrial membrane 17 (yeast) homolog B (TIM17B), mRNA.
203343_at	UDP-glucose dehydrogenase	UGDH	252	P	66	A	4	360	P	14	A	26	62	P	50	A	1	Homo sapiens UDP-glucose dehydrogenase (UGDH), mRNA.
203344_s_at	retinoblastoma binding protein 8	RBBP8	122	P	185	P	1	113	P	166	M	1	232	P	130	P	2	Homo sapiens retinoblastoma-binding protein 8 (RBBP8), mRNA.
203345_s_at	likely ortholog of mouse metal response element binding transcription factor 2	M96	280	P	365	P	1	158	P	324	P	0	383	P	420	P	1	EST
203349_s_at	ets variant gene 5 (ets-related molecule)	ETV5	7	A	66	A	0	39	A	16	A	2	31	A	16	A	2	Homo sapiens ets variant gene 5 (ets-related molecule) (ETV5), mRNA.
203350_at	adaptor-related protein complex 1, gamma 1 subunit	AP1G1	86	A	24	A	4	46	A	28	A	2	75	A	36	A	2	Homo sapiens adaptor-related protein complex 1, gamma 1 subunit (AP1G1), mRNA.
203351_s_at	origin recognition complex, subunit 4-like (yeast)	ORC4L	135	P	117	P	1	186	P	113	M	2	110	P	72	A	2	Homo sapiens origin recognition complex subunit 4 (ORC4L) mRNA, complete cds.
203353_s_at	methyl-CpG binding domain protein 1	MBD1	153	A	259	A	1	158	A	178	A	1	199	P	325	A	1	Homo sapiens methyl-CpG binding domain protein 1 (MBD1), transcript variant 1, mRNA.
203356_at	Homo sapiens cDNA FLJ36423 fis, clone THYMU2011308.		34	A	28	A	1	75	P	21	A	4	15	A	52	A	0	EST
203358_s_at	enhancer of zeste homolog 2 (Drosophila)	EZH2	73	P	24	A	3	37	A	8	A	5	43	P	30	A	1	Homo sapiens enhancer of zeste (Drosophila) homolog 2 (EZH2), mRNA.
203359_s_at	c-myc binding protein	MYCBP	134	P	186	P	1	170	P	146	P	1	175	P	207	P	1	EST
203362_s_at	MAD2 mitotic arrest deficient-like 1 (yeast)	MAD2L1	79	P	17	A	5	47	P	29	A	2	32	A	39	A	1	Homo sapiens MAD2 (mitotic arrest deficient, yeast, homolog)-like 1 (MAD2L1), mRNA.
203365_s_at	matrix metalloproteinase 15 (membrane-inserted)	MMP15	3	A	9	A	0	14	A	18	A	1	6	A	13	A	0	Homo sapiens matrix metalloproteinase 15 (membrane-inserted) (MMP15), mRNA.
203366_at	polymerase (DNA directed), gamma	POLG	83	P	176	P	0	58	P	61	A	1	103	P	128	A	1	Homo sapiens polymerase (DNA directed), gamma (POLG), nuclear gene encoding mitochondrial protein, mRNA.
203367_at	dual specificity phosphatase 14	DUSP14	200	P	88	A	2	291	P	94	A	3	89	A	80	A	1	Homo sapiens MKP-1 like protein tyrosine phosphatase (MKP-L), mRNA.
203370_s_at	enigma (LIM domain protein)	ENIGMA	18	A	106	A	0	48	A	32	A	1	76	P	71	A	1	Homo sapiens enigma (LIM domain protein) (ENIGMA), mRNA.
203371_s_at	NADH dehydrogenase (ubiquinone) 1 beta subcomplex, 3, 12kDa	NDUFB3	490	P	524	P	1	718	P	461	P	2	635	P	601	P	1	Homo sapiens NADH dehydrogenase (ubiquinone) 1 beta subcomplex, 3 (12kD, B12) (NDUFB3), mRNA.
203373_at	suppressor of cytokine signaling 2	SOCS2	150	P	162	P	1	343	P	126	P	3	30	A	84	P	0	Homo sapiens STAT induced STAT inhibitor-2 (STATI2), mRNA.
203375_s_at	tripeptidyl peptidase II	TPP2	52	P	56	P	1	55	P	62	P	1	47	P	74	A	1	Homo sapiens tripeptidyl peptidase II (TPP2), mRNA.
203376_at	pre-mRNA splicing factor 17	PRP17	110	P	311	P	0	173	P	210	P	1	322	P	247	P	1	EST
203378_at	PCF11p homolog	PCF11	65	P	104	P	1	70	P	135	P	1	68	P	151	P	0	Homo sapiens mRNA for KIAA0824 protein, partial cds.
203379_at	ribosomal protein S6 kinase, 90kDa, polypeptide 1	RPS6KA1	90	P	286	P	0	134	P	249	P	1	368	P	370	P	1	Homo sapiens ribosomal protein S6 kinase, 90kD, polypeptide 1 (RPS6KA1), mRNA.
203382_s_at	apolipoprotein E	APOE	3	A	3	A	1	5	A	4	A	1	96	A	5	A	20	Homo sapiens apolipoprotein E (APOE), mRNA.
203383_s_at	golgi autoantigen, golgin subfamily a, 1	GOLGA1	143	A	20	A	7	65	A	23	A	3	126	A	225	M	1	EST
203385_at	diacylglycerol kinase, alpha 80kDa	DGKA	108	P	152	A	1	82	A	152	A	1	133	P	188	A	1	Homo sapiens diacylglycerol kinase, alpha (80kD) (DGKA), mRNA.
203388_at	arrestin, beta 2	ARRB2	14	A	271	M	0	7	A	104	A	0	182	P	133	A	1	Homo sapiens arrestin, beta 2 (ARRB2), mRNA.
203389_at	kinesin family member 3C	KIF3C	30	A	82	A	0	65	A	114	A	1	64	A	89	A	1	Homo sapiens kinesin-related protein (KIF3C) mRNA, complete cds.
203391_at	FK506 binding protein 2, 13kDa	FKBP2	233	P	18	A	13	211	P	26	A	8	51	A	20	A	2	Homo sapiens FK506-binding protein 2 (13kD) (FKBP2), mRNA.
203392_s_at	C-terminal binding protein 1	CTBP1	86	A	168	A	1	156	P	123	A	1	90	P	114	A	1	Homo sapiens C-terminal binding protein 1 (CTBP1), mRNA.
203395_s_at	hairy and enhancer of split 1, (Drosophila)	HES1	147	P	48	A	3	112	P	94	P	1	64	P	74	A	1	Homo sapiens hairy (Drosophila)-homolog (HRY), mRNA.
203396_at	proteasome (prosome, macropain) subunit, alpha type, 4	PSMA4	686	P	662	P	1	1023	P	395	P	3	634	P	404	P	2	Homo sapiens proteasome (prosome, macropain) subunit, alpha type, 4 (PSMA4), mRNA.
203397_s_at	UDP-N-acetyl-alpha-D-galactosamine:polypeptide N-acetylgalactosaminyltransferase 3 (GalNAc-T3)	GALNT3	245	P	135	M	2	111	P	90	A	1	33	A	53	A	1	EST
203399_x_at	pregnancy specific beta-1-glycoprotein 3	PSG3	3	A	29	A	0	17	M	22	A	1	20	A	10	A	2	Homo sapiens pregnancy specific beta-1-glycoprotein 3 (PSG3), mRNA.
203400_s_at	transferrin	TF	21	A	41	A	1	6	A	76	A	0	7	A	40	A	0	Homo sapiens transferrin (TF), mRNA.
203401_at	phosphoribosyl pyrophosphate synthetase 2	PRPS2	127	P	123	P	1	107	P	55	M	2	112	P	56	P	2	Homo sapiens phosphoribosyl pyrophosphate synthetase 2 (PRPS2), mRNA.
203402_at	potassium voltage-gated channel, shaker-related subfamily, beta member 2	KCNAB2	55	A	201	P	0	75	A	277	P	0	201	P	215	P	1	EST
203403_s_at	ring finger protein (C3H2C3 type) 6	RNF6	119	P	88	P	1	115	P	99	P	1	176	P	93	P	2	Homo sapiens ring finger protein (C3H2C3 type) 6 (RNF6), mRNA.
203405_at	Down syndrome critical region gene 2	DSCR2	224	P	71	A	3	170	P	52	A	3	92	P	52	A	2	Homo sapiens Down syndrome critical region gene 2 (DSCR2), mRNA.
203406_at	microfibrillar-associated protein 1	MFAP1	315	P	345	P	1	342	P	254	P	1	273	P	368	P	1	Homo sapiens microfibrillar-associated protein 1 (MFAP1), mRNA.
203407_at	periplakin	PPL	186	P	4	A	45	71	A	6	A	11	96	A	14	A	7	Homo sapiens periplakin (PPL), mRNA.
203408_s_at	special AT-rich sequence binding protein 1 (binds to nuclear matrix/scaffold-associating DNA's)	SATB1	68	A	357	P	0	156	P	210	P	1	317	P	355	P	1	Homo sapiens special AT-rich sequence binding protein 1 (binds to nuclear matrixscaffold-associating DNAs) (SATB1), mRNA.
203409_at	damage-specific DNA binding protein 2, 48kDa	DDB2	267	P	207	P	1	82	P	154	A	1	136	P	134	A	1	Homo sapiens damage-specific DNA binding protein 2 (48kD) (DDB2), mRNA.
203410_at	adaptor-related protein complex 3, mu 2 subunit	AP3M2	246	P	139	A	2	119	A	117	A	1	78	P	28	A	3	Homo sapiens adaptor-related protein complex 3, mu 2 subunit (AP3M2), mRNA.
203411_s_at	lamin A/C	LMNA	431	P	80	A	5	170	P	104	A	2	183	P	155	A	1	Homo sapiens lamin AC (LMNA), mRNA.
203412_at	leucine-zipper-like transcriptional regulator, 1	LZTR1	118	P	155	A	1	131	A	61	A	2	150	P	113	A	1	Homo sapiens leucine-zipper-like transcriptional regulator, 1 (LZTR1), mRNA.
203413_at	NEL-like 2 (chicken)	NELL2	63	A	326	P	0	269	P	363	P	1	56	A	395	P	0	Homo sapiens nel (chicken)-like 2 (NELL2), mRNA.
203414_at	monocyte to macrophage differentiation-associated	MMD	70	P	653	P	0	173	P	434	P	0	528	P	338	P	2	Homo sapiens monocyte to macrophage differentiation-associated (MMD), mRNA.
203415_at	programmed cell death 6	PDCD6	115	P	62	A	2	288	P	194	P	1	182	P	171	P	1	Homo sapiens programmed cell death 6 (PDCD6), mRNA.
203416_at	CD53 antigen	CD53	413	P	2910	P	0	959	P	2753	P	0	2146	P	3571	P	1	Homo sapiens CD53 antigen (CD53), mRNA.
203417_at	microfibrillar-associated protein 2	MFAP2	20	A	12	A	2	7	A	12	A	1	5	A	12	A	0	Homo sapiens microfibrillar-associated protein 2 (MFAP2), transcript variant 1, mRNA.
203418_at	cyclin A2	CCNA2	4	A	7	A	1	10	A	90	A	0	44	A	47	A	1	Homo sapiens cyclin A2 (CCNA2), mRNA.
203420_at	family with sequence similarity 8, member A1	FAM8A1	447	P	1154	P	0	184	P	650	P	0	307	P	504	P	1	Homo sapiens Autosomal Highly Conserved Protein (AHCP), mRNA.
203421_at	p53-induced protein	PIG11	66	A	18	A	4	10	A	27	A	0	10	A	37	A	0	Homo sapiens p53-induced protein (PIG11), mRNA.
203422_at	polymerase (DNA directed), delta 1, catalytic subunit 125kDa	POLD1	94	A	71	A	1	71	A	125	A	1	70	A	20	A	3	Homo sapiens polymerase (DNA directed), delta 1, catalytic subunit (125kD) (POLD1), mRNA.
203423_at	retinol binding protein 1, cellular	RBP1	40	A	88	A	0	33	A	49	A	1	16	A	19	A	1	Homo sapiens retinol-binding protein 1, cellular (RBP1), mRNA.
203426_s_at	insulin-like growth factor binding protein 5	IGFBP5	84	P	27	A	3	8	A	13	A	1	3	A	11	A	0	Human insulin-like growth factor binding protein 5 (IGFBP-5) mRNA, complete cds.
203429_s_at	chromosome 1 open reading frame 9	C1orf9	104	P	113	P	1	82	P	98	P	1	75	P	49	A	2	Homo sapiens membrane protein CH1 (CH1), mRNA.
203430_at	heme binding protein 2	HEBP2	592	P	340	P	2	918	P	426	P	2	362	P	371	P	1	Homo sapiens putative heme-binding protein (SOUL), mRNA.
203433_at	5,10-methenyltetrahydrofolate synthetase (5-formyltetrahydrofolate cyclo-ligase)	MTHFS	59	P	142	P	0	165	P	197	P	1	156	P	56	A	3	Homo sapiens 5,10-methenyltetrahydrofolate synthetase (5-formyltetrahydrofolate cyclo-ligase) (MTHFS), mRNA.
203434_s_at	membrane metallo-endopeptidase (neutral endopeptidase, enkephalinase, CALLA, CD10)	MME	4	A	92	A	0	7	A	106	A	0	17	A	97	A	0	EST
203436_at	ribonuclease P (30kD)	RPP30	126	P	163	M	1	116	P	83	A	1	142	P	93	P	2	Homo sapiens ribonuclease P (30kD) (RPP30), mRNA.
203437_at	chromosome 17 open reading frame 35	C17orf35	95	P	201	P	0	198	P	258	P	1	251	P	334	P	1	Homo sapiens putative receptor protein (PMI), mRNA.
203439_s_at	stanniocalcin 2	STC2	77	P	91	M	1	41	A	107	A	0	62	P	119	A	1	Homo sapiens, stanniocalcin 2, clone MGC:1881, mRNA, complete cds.
203440_at	cadherin 2, type 1, N-cadherin (neuronal)	CDH2	8	A	3	A	2	18	A	12	A	1	0	A	3	A	0	Human N-cadherin mRNA, complete cds.
203443_at			11	A	16	A	1	27	A	28	A	1	23	A	24	A	1	Homo sapiens MTA1-L1 gene, complete cds
203445_s_at	conserved gene amplified in osteosarcoma	OS4	520	P	555	P	1	563	P	739	P	1	1008	P	928	P	1	Homo sapiens conserved gene amplified in osteosarcoma (OS4), mRNA.
203446_s_at	oculocerebrorenal syndrome of Lowe	OCRL	116	A	104	A	1	192	P	128	A	1	44	A	131	A	0	Homo sapiens oculocerebrorenal syndrome of Lowe (OCRL), transcript variant a, mRNA.
203447_at	proteasome (prosome, macropain) 26S subunit, non-ATPase, 5	PSMD5	163	P	136	M	1	171	P	73	A	2	102	P	106	A	1	EST
203449_s_at	telomeric repeat binding factor (NIMA-interacting) 1	TERF1	185	P	116	P	2	94	P	31	A	3	52	P	28	A	2	Homo sapiens telomeric repeat binding factor (NIMA-interacting) 1 (TERF1), transcript variant 1, mRNA.
203453_at	sodium channel, nonvoltage-gated 1 alpha	SCNN1A	893	P	12	A	74	40	A	14	A	3	81	P	8	A	10	Homo sapiens sodium channel, nonvoltage-gated 1 alpha (SCNN1A), mRNA.
203454_s_at	ATX1 antioxidant protein 1 homolog (yeast)	ATOX1	311	P	131	A	2	259	P	63	A	4	141	P	34	A	4	Homo sapiens ATX1 (antioxidant protein 1, yeast) homolog 1 (ATOX1), mRNA.
203455_s_at	spermidine/spermine N1-acetyltransferase	SAT	1842	P	4321	P	0	1274	P	2516	P	1	1186	P	2043	P	1	Homo sapiens spermidinespermine N1-acetyltransferase (SAT), mRNA.
203457_at	syntaxin 7	STX7	47	M	82	A	1	53	A	131	M	0	25	A	159	M	0	Homo sapiens syntaxin 7 (STX7), mRNA.
203458_at	sepiapterin reductase (7,8-dihydrobiopterin:NADP+ oxidoreductase)	SPR	353	P	145	A	2	171	P	96	A	2	106	A	92	A	1	EST
203459_s_at	vacuolar protein sorting 16 (yeast)	VPS16	251	P	202	P	1	143	P	148	P	1	713	P	247	P	3	Homo sapiens vacuolar protein sorting 16 (yeast homolog) (VPS16), mRNA.
203460_s_at	presenilin 1 (Alzheimer disease 3)	PSEN1	119	P	192	P	1	137	P	190	P	1	312	P	208	P	2	Homo sapiens presenilin 1 (Alzheimer disease 3) (PSEN1), transcript variant I-463, mRNA.
203461_at	chromodomain helicase DNA binding protein 2	CHD2	48	P	48	A	1	40	P	65	A	1	58	M	86	P	1	Homo sapiens chromodomain helicase DNA binding protein 2 (CHD2), mRNA.
203466_at	MpV17 transgene, murine homolog, glomerulosclerosis	MPV17	97	P	20	A	5	98	A	53	A	2	94	P	45	A	2	Homo sapiens MpV17 transgene, murine homolog, glomerulosclerosis (MPV17), mRNA.
203467_at	phosphomannomutase 1	PMM1	71	A	42	A	2	95	A	20	A	5	73	A	13	A	6	Homo sapiens phosphomannomutase 1 (PMM1), mRNA.
203469_s_at	cyclin-dependent kinase (CDC2-like) 10	CDK10	6	A	7	A	1	6	A	11	A	1	11	A	23	A	0	Homo sapiens cyclin-dependent kinase (CDC2-like) 10 (CDK10), mRNA.
203471_s_at	pleckstrin	PLEK	120	A	796	P	0	184	P	382	P	0	679	P	524	P	1	Homo sapiens pleckstrin (PLEK), mRNA.
203473_at	solute carrier family 21 (organic anion transporter), member 9	SLC21A9	27	A	39	A	1	11	A	46	A	0	35	A	12	A	3	Homo sapiens solute carrier family 21 (organic anion transporter), member 9 (SLC21A9), mRNA.
203474_at	IQ motif containing GTPase activating protein 2	IQGAP2	108	P	233	P	0	136	P	260	P	1	215	P	255	P	1	Homo sapiens IQ motif containing GTPase activating protein 2 (IQGAP2), mRNA.
203475_at	cytochrome P450, family 19, subfamily A, polypeptide 1	CYP19A1	52	A	76	A	1	24	A	37	A	1	46	A	122	A	0	Homo sapiens cytochrome P450, subfamily XIX (aromatization of androgens) (CYP19), mRNA.
203476_at	trophoblast glycoprotein	TPBG	229	P	46	P	5	78	P	72	P	1	38	P	82	A	0	Homo sapiens 5T4 oncofetal trophoblast glycoprotein (5T4), mRNA.
203477_at	collagen, type XV, alpha 1	COL15A1	3	A	35	A	0	12	A	11	A	1	7	A	30	A	0	Homo sapiens collagen, type XV, alpha 1 (COL15A1), mRNA.
203478_at	NADH dehydrogenase (ubiquinone) 1, subcomplex unknown, 1, 6kDa	NDUFC1	156	P	36	A	4	546	P	29	A	19	190	P	70	A	3	Homo sapiens NADH dehydrogenase (ubiquinone) 1, subcomplex unknown, 1 (6kD, KFYI) (NDUFC1), mRNA.
203484_at	Sec61 gamma	SEC61G	255	P	46	A	6	471	P	108	P	4	197	P	62	A	3	Homo sapiens Sec61 gamma (SEC61G), mRNA.
203485_at	reticulon 1	RTN1	30	A	114	P	0	54	P	31	A	2	195	P	92	P	2	Homo sapiens reticulon 1 (RTN1), mRNA.
203497_at	PPAR binding protein	PPARBP	162	P	81	P	2	132	P	81	A	2	161	P	71	P	2	Homo sapiens PPAR binding protein (PPARBP), mRNA.
203498_at	Down syndrome critical region gene 1-like 1	DSCR1L1	26	P	43	A	1	42	A	86	A	0	22	A	59	A	0	Homo sapiens Down syndrome critical region gene 1-like 1 (DSCR1L1), mRNA.
203499_at	EphA2	EPHA2	174	A	4	A	48	38	A	36	A	1	56	A	12	A	5	Homo sapiens EphA2 (EPHA2), mRNA.
203501_at	plasma glutamate carboxypeptidase	PGCP	79	M	318	P	0	72	A	199	P	0	134	P	214	P	1	Homo sapiens plasma glutamate carboxypeptidase (PGCP), mRNA.
203502_at	2,3-bisphosphoglycerate mutase	BPGM	94	P	216	P	0	94	P	682	P	0	63	P	196	P	0	Homo sapiens 2,3-bisphosphoglycerate mutase (BPGM), mRNA.
203504_s_at	ATP-binding cassette, sub-family A (ABC1), member 1	ABCA1	68	A	82	P	1	47	P	93	P	1	54	P	103	P	1	Homo sapiens ATP-binding cassette, sub-family A (ABC1), member 1 (ABCA1), mRNA.
203506_s_at	trinucleotide repeat containing 11 (THR-associated protein, 230kDa subunit)	TNRC11	44	A	48	A	1	28	A	50	A	1	47	A	41	A	1	Homo sapiens trinucleotide repeat containing 11 (THR-associated protein, 230 kDa subunit) (TNRC11), mRNA.
203507_at	CD68 antigen	CD68	25	A	140	M	0	36	A	48	A	1	99	P	26	A	4	Homo sapiens CD68 antigen (CD68), mRNA.
203508_at	tumor necrosis factor receptor superfamily, member 1B	TNFRSF1B	64	P	856	P	0	125	A	290	P	0	1781	P	625	P	3	Homo sapiens tumor necrosis factor receptor superfamily, member 1B (TNFRSF1B), mRNA.
203509_at	sortilin-related receptor, L(DLR class) A repeats-containing	SORL1	346	P	2246	P	0	984	P	2661	P	0	3982	P	3763	P	1	Homo sapiens sortilin-related receptor, L(DLR class) A repeats-containing (SORL1), mRNA.
203511_s_at	similar to yeast BET3 (S. cerevisiae)	BET3	110	P	149	A	1	238	P	240	P	1	161	P	215	A	1	Homo sapiens bet3 (BET3) mRNA, complete cds.
203514_at	mitogen-activated protein kinase kinase kinase 3	MAP3K3	134	P	346	P	0	110	P	113	A	1	515	P	343	P	2	EST
203515_s_at	phosphomevalonate kinase	PMVK	313	P	236	P	1	384	P	258	P	1	97	P	225	M	0	Homo sapiens phosphomevalonate kinase (PMVK), mRNA.
203516_at	syntrophin, alpha 1 (dystrophin-associated protein A1, 59kDa, acidic component)	SNTA1	86	P	98	P	1	110	P	200	P	1	88	P	255	P	0	Homo sapiens syntrophin, alpha 1(dystrophin-associated protein A1, 59kD, acidic component) (SNTA1), mRNA.
203517_at	metaxin 2	MTX2	214	P	60	P	4	250	P	44	P	6	123	P	44	A	3	Homo sapiens metaxin 2 (MTX2), mRNA.
203521_s_at	endocrine regulator	ZFP318	38	P	31	A	1	67	P	10	A	7	106	P	27	A	4	Homo sapiens endocrine regulator (HRIHFB2436), mRNA.
203522_at	copper chaperone for superoxide dismutase	CCS	141	P	61	A	2	137	P	91	A	2	66	P	155	P	0	Homo sapiens copper chaperone for superoxide dismutase (CCS), mRNA.
203523_at	lymphocyte-specific protein 1	LSP1	27	A	426	P	0	99	A	283	P	0	96	A	214	P	0	Homo sapiens lymphocyte-specific protein 1 (LSP1), mRNA.
203524_s_at	mercaptopyruvate sulfurtransferase	MPST	222	P	125	A	2	302	P	141	A	2	129	P	107	A	1	Homo sapiens mercaptopyruvate sulfurtransferase (MPST), mRNA.
203525_s_at	adenomatosis polyposis coli	APC	24	P	78	P	0	15	M	68	A	0	75	P	63	A	1	EST
203528_at	sema domain, immunoglobulin domain (Ig), transmembrane domain (TM) and short cytoplasmic domain, (semaphorin) 4D	SEMA4D	27	A	383	P	0	85	A	325	A	0	275	P	291	P	1	Homo sapiens sema domain, immunoglobulin domain (Ig), transmembrane domain (TM) and short cytoplasmic domain, (semaphorin) 4D (SEMA4D), mRNA.
203529_at	protein phosphatase 6, catalytic subunit	PPP6C	770	P	826	P	1	724	P	484	P	1	915	P	653	P	1	Homo sapiens serinethreonine protein phosphatase catalytic subunit (LOC51723), mRNA.
203530_s_at	syntaxin 4A (placental)	STX4A	160	P	201	P	1	153	P	171	A	1	431	P	247	P	2	Homo sapiens syntaxin 4A (placental) (STX4A), mRNA.
203531_at	Homo sapiens, clone IMAGE:4820631, mRNA		238	P	140	P	2	208	P	148	P	1	216	P	153	P	1	EST
203534_at	LSM1 homolog, U6 small nuclear RNA associated (S. cerevisiae)	LSM1	311	P	413	A	1	412	A	463	A	1	405	P	499	A	1	Homo sapiens Lsm1 protein (LSM1), mRNA.
203535_at	S100 calcium binding protein A9 (calgranulin B)	S100A9	1102	P	5651	P	0	1266	P	5204	P	0	7916	P	7341	P	1	Homo sapiens S100 calcium-binding protein A9 (calgranulin B) (S100A9), mRNA.
203536_s_at	WD40 protein Ciao1	CIAO1	72	A	19	A	4	52	A	8	A	6	68	A	13	A	5	Homo sapiens WD40 protein Ciao1 (CIAO1), mRNA.
203537_at	phosphoribosyl pyrophosphate synthetase-associated protein 2	PRPSAP2	111	P	102	P	1	149	P	152	P	1	158	P	120	A	1	Homo sapiens phosphoribosyl pyrophosphate synthetase-associated protein 2 (PRPSAP2), mRNA.
203538_at	calcium modulating ligand	CAMLG	452	P	220	P	2	714	P	233	P	3	102	P	338	P	0	Homo sapiens calcium modulating ligand (CAMLG), mRNA.
203540_at	glial fibrillary acidic protein	GFAP	6	A	16	A	0	42	A	20	A	2	8	A	86	A	0	Homo sapiens glial fibrillary acidic protein (GFAP), mRNA.
203543_s_at	basic transcription element binding protein 1	BTEB1	2	A	37	A	0	13	A	2	A	6	8	A	2	A	4	Homo sapiens basic transcription element binding protein 1 (BTEB1), mRNA.
203544_s_at	signal transducing adaptor molecule (SH3 domain and ITAM motif) 1	STAM	105	P	79	P	1	119	P	112	P	1	94	P	45	A	2	Homo sapiens signal transducing adaptor molecule (SH3 domain and ITAM motif) 1 (STAM), mRNA.
203547_at	CD4 antigen (p55)	CD4	94	A	95	A	1	77	A	40	A	2	100	P	50	A	2	Human chromosome 12p13 sequence
203549_s_at	lipoprotein lipase	LPL	2	A	76	A	0	30	A	71	A	0	36	A	45	A	1	Homo sapiens lipoprotein lipase (LPL), mRNA.
203550_s_at	chromosome 1 open reading frame 2	C1orf2	206	P	45	A	5	252	P	59	A	4	258	P	42	A	6	Homo sapiens chromosome 1 open reading frame 2 (C1ORF2), mRNA.
203551_s_at	COX11 homolog, cytochrome c oxidase assembly protein (yeast)	COX11	46	P	26	A	2	76	P	131	A	1	70	P	52	A	1	Homo sapiens COX11 (yeast) homolog, cytochrome c oxidase assembly protein (COX11), mRNA.
203552_at	mitogen-activated protein kinase kinase kinase kinase 5	MAP4K5	96	P	56	P	2	32	P	39	P	1	30	P	39	A	1	EST
203554_x_at	pituitary tumor-transforming 1	PTTG1	232	P	117	A	2	345	P	555	A	1	376	P	90	A	4	Homo sapiens pituitary tumor-transforming 1 (PTTG1), mRNA.
203555_at	protein tyrosine phosphatase, non-receptor type 18 (brain-derived)	PTPN18	44	A	65	A	1	61	A	40	A	2	77	A	31	A	2	Homo sapiens protein tyrosine phosphatase, non-receptor type 18 (brain-derived) (PTPN18), mRNA.
203557_s_at	6-pyruvoyl-tetrahydropterin synthase/dimerization cofactor of hepatocyte nuclear factor 1 alpha (TCF1)	PCBD	103	A	14	A	7	320	P	42	A	8	16	A	56	A	0	Homo sapiens 6-pyruvoyl-tetrahydropterin synthasedimerization cofactor of hepatocyte nuclear factor 1 alpha (TCF1) (PCBD), mRNA.
203559_s_at	amiloride binding protein 1 (amine oxidase (copper-containing))	ABP1	41	P	110	M	0	45	A	60	P	1	68	P	29	A	2	Homo sapiens amiloride binding protein 1 (amine oxidase (copper-containing)) (ABP1), mRNA.
203560_at	gamma-glutamyl hydrolase (conjugase, folylpolygammaglutamyl hydrolase)	GGH	37	M	85	A	0	101	P	58	A	2	179	P	42	A	4	Homo sapiens gamma-glutamyl hydrolase (conjugase, folylpolygammaglutamyl hydrolase) (GGH), mRNA.
203561_at	Fc fragment of IgG, low affinity IIa, receptor for (CD32)	FCGR2A	57	P	594	P	0	88	P	454	P	0	1127	P	526	P	2	Homo sapiens Fc fragment of IgG, low affinity IIa, receptor for (CD32) (FCGR2A), mRNA.
203562_at	fasciculation and elongation protein zeta 1 (zygin I)	FEZ1	41	A	75	A	1	45	M	99	P	0	24	A	96	M	0	Homo sapiens fasciculation and elongation protein zeta 1 (zygin I) (FEZ1), transcript variant 1, mRNA.
203563_at	actin filament associated protein	AFAP	8	A	17	A	0	1	A	20	A	0	1	A	12	A	0	Homo sapiens actin filament associated protein (AFAP), mRNA.
203564_at	Fanconi anemia, complementation group G	FANCG	228	A	75	A	3	87	A	54	A	2	8	A	21	A	0	Homo sapiens Fanconi anemia, complementation group G (FANCG), mRNA.
203565_s_at	menage a trois 1 (CAK assembly factor)	MNAT1	42	A	10	A	4	60	A	9	A	7	24	A	13	A	2	Homo sapiens menage a trois 1 (CAK assembly factor) (MNAT1), mRNA.
203566_s_at	amylo-1, 6-glucosidase, 4-alpha-glucanotransferase (glycogen debranching enzyme, glycogen storage disease type III)	AGL	10	P	67	P	0	79	P	56	A	1	46	P	42	P	1	Homo sapiens amylo-1,6-glucosidase, 4-alpha-glucanotransferase (glycogen debranching enzyme, glycogen storage disease type III) (AGL), transcript variant 5, mRNA.
203569_s_at	oral-facial-digital syndrome 1	OFD1	555	P	399	P	1	324	P	333	P	1	447	P	268	P	2	Homo sapiens chromosome X open reading frame 5 (CXORF5), mRNA.
203570_at	lysyl oxidase-like 1	LOXL1	46	A	6	A	7	3	A	8	A	0	7	A	10	A	1	Homo sapiens lysyl oxidase-like 1 (LOXL1), mRNA.
203571_s_at	adipose specific 2	APM2	166	M	3	A	56	243	P	6	A	40	14	A	3	A	5	Homo sapiens adipose specific 2 (APM2), mRNA.
203572_s_at	TAF6 RNA polymerase II, TATA box binding protein (TBP)-associated factor, 80kDa	TAF6	213	P	182	P	1	68	A	150	P	0	156	P	81	A	2	Homo sapiens TATA box binding protein (TBP)-associated factor, RNA polymerase II, E, 7085kD (TAF2E), mRNA.
203573_s_at	Rab geranylgeranyltransferase, alpha subunit	RABGGTA	74	P	124	P	1	82	P	146	P	1	74	P	114	A	1	Homo sapiens Rab geranylgeranyltransferase, alpha subunit (RABGGTA), mRNA.
203574_at	nuclear factor, interleukin 3 regulated	NFIL3	175	P	888	P	0	456	P	367	P	1	518	P	330	P	2	Homo sapiens nuclear factor, interleukin 3 regulated (NFIL3), mRNA.
203575_at	casein kinase 2, alpha prime polypeptide	CSNK2A2	55	M	88	P	1	85	P	48	A	2	116	P	93	P	1	Homo sapiens casein kinase 2, alpha prime polypeptide (CSNK2A2), mRNA.
203576_at	branched chain aminotransferase 2, mitochondrial	BCAT2	125	P	16	A	8	150	P	7	A	21	36	A	8	A	4	Homo sapiens branched chain aminotransferase 2, mitochondrial (BCAT2), mRNA.
203577_at	general transcription factor IIH, polypeptide 4, 52kDa	GTF2H4	39	P	54	A	1	26	A	65	A	0	71	P	31	A	2	Homo sapiens general transcription factor IIH, polypeptide 4 (52kD subunit) (GTF2H4), mRNA.
203579_s_at	solute carrier family 7 (cationic amino acid transporter, y+ system), member 6	SLC7A6	50	A	36	A	1	36	P	69	A	1	40	P	26	A	2	EST
203581_at	RAB4A, member RAS oncogene family	RAB4A	318	P	110	P	3	358	P	146	P	2	119	P	86	P	1	Homo sapiens, RAB4, member RAS oncogene family, clone MGC:1486, mRNA, complete cds.
203585_at	zinc finger protein 185 (LIM domain)	ZNF185	312	P	277	P	1	50	A	229	P	0	270	P	406	P	1	Homo sapiens zinc finger protein 185 (LIM domain) (ZNF185), mRNA.
203586_s_at	ADP-ribosylation factor 4-like	ARF4L	88	P	183	A	0	60	P	135	P	0	50	A	146	A	0	Homo sapiens ADP-ribosylation factor 4-like (ARF4L), mRNA.
203588_s_at	transcription factor Dp-2 (E2F dimerization partner 2)	TFDP2	39	A	84	A	0	85	A	84	A	1	51	A	50	A	1	EST
203590_at	dynein, cytoplasmic, light intermediate polypeptide 2	DNCLI2	95	M	34	A	3	200	A	114	A	2	64	A	93	A	1	Homo sapiens dynein, cytoplasmic, light intermediate polypeptide 2 (DNCLI2), mRNA.
203591_s_at	colony stimulating factor 3 receptor (granulocyte)	CSF3R	59	A	406	P	0	94	A	248	P	0	303	P	375	P	1	Homo sapiens colony stimulating factor 3 receptor (granulocyte) (CSF3R), mRNA.
203592_s_at	follistatin-like 3 (secreted glycoprotein)	FSTL3	15	A	115	A	0	62	A	99	A	1	54	A	156	A	0	Homo sapiens follistatin-like 3 (secreted glycoprotein) (FSTL3), mRNA.
203593_at	CD2-associated protein	CD2AP	139	P	74	P	2	121	P	61	P	2	41	A	31	A	1	Homo sapiens CD2-associated protein (CD2AP), mRNA.
203594_at	RTC domain containing 1	RTCD1	129	P	39	A	3	144	P	125	P	1	183	P	68	P	3	Homo sapiens RNA 3-terminal phosphate cyclase (RPC), mRNA.
203595_s_at	retinoic acid- and interferon-inducible protein (58kD)	RI58	227	P	418	P	1	32	A	82	A	0	56	A	55	A	1	EST
203599_s_at	WW domain binding protein 4 (formin binding protein 21)	WBP4	56	P	49	A	1	53	A	11	A	5	45	A	67	P	1	Homo sapiens WW domain binding protein 4 (formin binding protein 21) (WBP4), mRNA.
203600_s_at	chromosome 4 open reading frame 8	C4orf8	135	P	219	A	1	166	P	203	A	1	238	P	180	A	1	Homo sapiens gene with multiple splice variants near HD locus on 4p16.3 (RES4-22), mRNA.
203602_s_at	zinc finger protein 151 (pHZ-67)	ZNF151	109	P	105	M	1	80	M	137	A	1	99	P	132	P	1	Homo sapiens zinc finger protein 151 (pHZ-67) (ZNF151), mRNA.
203603_s_at	zinc finger homeobox 1b	ZFHX1B	12	A	85	P	0	1	A	51	A	0	47	P	34	P	1	Homo sapiens zinc finger homeobox 1B (ZFHX1B), mRNA.
203605_at	signal recognition particle 54kDa	SRP54	457	P	280	P	2	339	P	171	P	2	211	P	141	P	1	Homo sapiens signal recognition particle 54kD (SRP54), mRNA.
203606_at	NADH dehydrogenase (ubiquinone) Fe-S protein 6, 13kDa (NADH-coenzyme Q reductase)	NDUFS6	1369	P	422	P	3	1588	P	357	A	4	968	P	512	A	2	Homo sapiens NADH dehydrogenase (ubiquinone) Fe-S protein 6 (13kD) (NADH-coenzyme Q reductase) (NDUFS6), mRNA.
203608_at	aldehyde dehydrogenase 5 family, member A1 (succinate-semialdehyde dehydrogenase)	ALDH5A1	5	A	2	A	2	21	A	48	A	0	3	A	3	A	1	Human DNA sequence from clone 73M23 on chromosome 6p22.2-22.3. Contains the 5 part of the possibly alternatively spliced gene for Phosphatidylinositol-glycan-specific Phospholipase D 1 precursor (EC 3.1.4.50, PIGPLD1, Glycoprotein Phospholipase D...
203610_s_at	tripartite motif-containing 38	TRIM38	107	P	447	P	0	35	A	169	P	0	108	P	202	A	1	EST
203611_at	telomeric repeat binding factor 2	TERF2	88	P	122	P	1	108	P	142	A	1	105	P	158	P	1	Homo sapiens telomeric repeat binding factor 2 (TERF2), mRNA.
203612_at	bystin-like	BYSL	102	M	102	A	1	174	A	105	A	2	49	A	185	A	0	Homo sapiens bystin-like (BYSL), mRNA.
203613_s_at	NADH dehydrogenase (ubiquinone) 1 beta subcomplex, 6, 17kDa	NDUFB6	642	P	442	P	1	657	P	366	P	2	298	P	439	P	1	Homo sapiens NADH dehydrogenase (ubiquinone) 1 beta subcomplex, 6 (17kD, B17) (NDUFB6), mRNA.
203615_x_at	sulfotransferase family, cytosolic, 1A, phenol-preferring, member 1	SULT1A1	262	P	265	P	1	220	P	496	P	0	513	P	286	P	2	Homo sapiens sulfotransferase family, cytosolic, 1A, phenol-preferring, member 1 (SULT1A1), mRNA.
203616_at	polymerase (DNA directed), beta	POLB	853	P	853	P	1	571	P	233	A	2	399	P	303	A	1	Homo sapiens polymerase (DNA directed), beta (POLB), mRNA.
203618_at	Fas apoptotic inhibitory molecule 2	FAIM2	20	A	23	A	1	58	A	90	A	1	53	A	117	A	0	Homo sapiens mRNA for KIAA0950 protein, partial cds.
203621_at	NADH dehydrogenase (ubiquinone) 1 beta subcomplex, 5, 16kDa	NDUFB5	351	P	154	P	2	336	P	142	A	2	261	P	213	P	1	Homo sapiens NADH dehydrogenase (ubiquinone) 1 beta subcomplex, 5 (16kD, SGDH) (NDUFB5), mRNA.
203622_s_at	putatative 28 kDa protein	LOC56902	220	P	166	A	1	124	P	135	A	1	74	P	133	A	1	Homo sapiens putatative 28 kDa protein (LOC56902), mRNA.
203623_at	likely ortholog of mouse plexin 3	PLXN3	57	A	43	A	1	58	A	71	A	1	13	A	76	A	0	EST
203624_at	DNA segment on chromosome X and Y (unique) 155 expressed sequence	DXYS155E	176	P	287	P	1	118	A	345	A	0	249	P	238	A	1	Homo sapiens DNA segment on chromosome X and Y (unique) 155 expressed sequence (DXYS155E), mRNA.
203627_at	insulin-like growth factor 1 receptor	IGF1R	15	A	69	A	0	52	A	89	A	1	37	P	92	A	0	EST
203629_s_at	component of oligomeric golgi complex 5	COG5	88	P	62	P	1	78	P	26	A	3	38	A	5	A	8	EST
203632_s_at	G protein-coupled receptor, family C, group 5, member B	GPRC5B	19	A	9	A	2	38	A	16	A	2	5	A	21	A	0	Homo sapiens G protein-coupled receptor, family C, group 5, member B (GPRC5B), mRNA.
203635_at	Down syndrome critical region gene 3	DSCR3	36	A	53	A	1	9	A	30	A	0	107	A	19	A	6	Homo sapiens Down syndrome critical region gene 3 (DSCR3), mRNA.
203637_s_at	midline 1 (Opitz/BBB syndrome)	MID1	19	A	70	A	0	128	P	31	A	4	26	P	84	A	0	Homo sapiens midline 1 (OpitzBBB syndrome) (MID1), mRNA.
203643_at	Ets2 repressor factor	ERF	14	A	24	A	1	57	A	114	A	1	9	A	78	A	0	Homo sapiens Ets2 repressor factor (ERF), mRNA.
203645_s_at	CD163 antigen	CD163	24	A	133	P	0	51	M	154	M	0	685	P	203	P	3	Homo sapiens CD163 antigen (CD163), mRNA.
203646_at	ferredoxin 1	FDX1	70	P	48	A	1	32	P	53	A	1	47	P	65	A	1	Homo sapiens ferredoxin 1 (FDX1), nuclear gene encoding mitochondrial protein, mRNA.
203649_s_at	phospholipase A2, group IIA (platelets, synovial fluid)	PLA2G2A	198	P	140	A	1	129	P	51	A	3	14	A	7	A	2	Homo sapiens phospholipase A2, group IIA (platelets, synovial fluid) (PLA2G2A), nuclear gene encoding mitochondrial protein, mRNA.
203650_at	protein C receptor, endothelial (EPCR)	PROCR	28	A	23	A	1	45	A	4	A	10	18	A	4	A	4	Homo sapiens protein C receptor, endothelial (EPCR) (PROCR), mRNA.
203652_at	mitogen-activated protein kinase kinase kinase 11	MAP3K11	184	P	261	P	1	148	P	172	P	1	435	P	178	A	2	Homo sapiens mitogen-activated protein kinase kinase kinase 11 (MAP3K11), mRNA.
203654_s_at	coilin	COIL	177	P	73	A	2	56	P	24	A	2	75	P	25	A	3	Homo sapiens coilin (COIL), mRNA.
203655_at	X-ray repair complementing defective repair in Chinese hamster cells 1	XRCC1	81	P	32	P	3	36	A	106	A	0	147	P	96	P	2	Homo sapiens X-ray repair complementing defective repair in Chinese hamster cells 1 (XRCC1), mRNA.
203657_s_at	cathepsin F	CTSF	335	P	90	A	4	96	P	150	A	1	43	A	50	A	1	Homo sapiens cathepsin F (CTSF), mRNA.
203658_at	solute carrier family 25 (carnitine/acylcarnitine translocase), member 20	SLC25A20	83	P	189	P	0	126	P	162	P	1	122	P	403	P	0	Homo sapiens, carnitineacylcarnitine translocase, clone MGC:1207, mRNA, complete cds.
203659_s_at	ret finger protein 2	RFP2	156	P	131	P	1	143	P	218	P	1	179	P	220	P	1	Homo sapiens ret finger protein 2 (RFP2), mRNA.
203660_s_at	pericentrin 2 (kendrin)	PCNT2	139	P	163	A	1	67	A	91	A	1	199	P	56	A	4	Homo sapiens pericentrin (PCNT), mRNA.
203663_s_at	cytochrome c oxidase subunit Va	COX5A	525	P	287	P	2	527	P	205	A	3	576	P	155	P	4	Homo sapiens cytochrome c oxidase subunit Va (COX5A), mRNA.
203664_s_at	polymerase (RNA) II (DNA directed) polypeptide D	POLR2D	82	P	40	A	2	74	A	4	A	19	64	P	19	A	3	Homo sapiens polymerase (RNA) II (DNA directed) polypeptide D (POLR2D), mRNA.
203665_at	heme oxygenase (decycling) 1	HMOX1	86	M	317	P	0	128	P	100	P	1	158	P	234	P	1	Homo sapiens heme oxygenase (decycling) 1 (HMOX1), mRNA.
203666_at	chemokine (C-X-C motif) ligand 12 (stromal cell-derived factor 1)	CXCL12	81	P	117	P	1	77	A	70	A	1	54	P	96	A	1	Homo sapiens stromal cell-derived factor 1 (SDF1), mRNA.
203667_at	tubulin-specific chaperone a	TBCA	1335	P	600	P	2	1240	P	450	P	3	811	P	426	P	2	Homo sapiens tubulin-specific chaperone a (TBCA), mRNA.
203668_at	mannosidase, alpha, class 2C, member 1	MAN2C1	101	P	236	P	0	106	P	295	A	0	123	P	231	A	1	Homo sapiens mannosidase, alpha, class 2C, member 1 (MAN2C1), mRNA.
203669_s_at	diacylglycerol O-acyltransferase homolog 1 (mouse)	DGAT1	86	P	14	A	6	5	A	101	A	0	81	P	59	A	1	Homo sapiens diacylglycerol O-acyltransferase (mouse) homolog (DGAT), mRNA.
203671_at	thiopurine S-methyltransferase	TPMT	74	A	28	A	3	45	A	93	A	0	38	A	53	A	1	EST
203673_at	thyroglobulin	TG	38	A	101	A	0	13	A	9	A	1	6	A	145	A	0	Homo sapiens thyroglobulin (TG), mRNA.
203675_at	nucleobindin 2	NUCB2	149	P	91	P	2	120	P	78	P	2	59	P	47	M	1	Homo sapiens nucleobindin 2 (NUCB2), mRNA.
203676_at	glucosamine (N-acetyl)-6-sulfatase (Sanfilippo disease IIID)	GNS	2	A	18	A	0	18	A	15	A	1	37	A	45	A	1	Homo sapiens glucosamine (N-acetyl)-6-sulfatase (Sanfilippo disease IIID) (GNS), mRNA.
203677_s_at	TAR (HIV) RNA binding protein 2	TARBP2	81	A	124	A	1	116	A	194	A	1	67	A	181	A	0	Homo sapiens TAR (HIV) RNA-binding protein 2 (TARBP2), mRNA.
203679_at	interleukin 1 receptor-like 1 ligand	IL1RL1LG	63	P	46	A	1	201	P	138	A	1	114	P	16	A	7	Homo sapiens putative T1ST2 receptor binding protein (IL1RL1LG), mRNA.
203680_at	protein kinase, cAMP-dependent, regulatory, type II, beta	PRKAR2B	13	A	281	P	0	49	P	202	P	0	240	P	178	P	1	Homo sapiens protein kinase, cAMP-dependent, regulatory, type II, beta (PRKAR2B), mRNA.
203683_s_at	vascular endothelial growth factor B	VEGFB	8	A	24	A	0	3	A	46	A	0	7	A	17	A	0	Homo sapiens vascular endothelial growth factor B (VEGFB), mRNA.
203685_at	B-cell CLL/lymphoma 2	BCL2	98	P	155	P	1	81	P	176	P	0	68	P	191	A	0	Homo sapiens B-cell CLLlymphoma 2 (BCL2), nuclear gene encoding mitochondrial protein, transcript variant alpha, mRNA.
203686_at	N-methylpurine-DNA glycosylase	MPG	69	P	24	A	3	110	M	125	A	1	48	P	52	A	1	Homo sapiens N-methylpurine-DNA glycosylase (MPG), mRNA.
203688_at	polycystic kidney disease 2 (autosomal dominant)	PKD2	16	A	9	A	2	16	A	31	A	0	24	A	16	A	2	Homo sapiens polycystic kidney disease 2 (autosomal dominant) (PKD2), mRNA.
203689_s_at	fragile X mental retardation 1	FMR1	45	P	123	P	0	32	A	73	A	0	51	A	52	A	1	EST
203692_s_at	E2F transcription factor 3	E2F3	188	P	340	P	1	185	P	291	M	1	49	A	385	P	0	EST
203695_s_at	deafness, autosomal dominant 5	DFNA5	52	A	6	A	8	55	A	88	A	1	55	A	70	A	1	Homo sapiens deafness, autosomal dominant 5 (DFNA5), mRNA.
203697_at	frizzled-related protein	FRZB	21	A	11	A	2	26	A	28	A	1	18	A	8	A	2	Human Fritz mRNA, complete cds.
203700_s_at	deiodinase, iodothyronine, type II	DIO2	35	A	50	A	1	11	A	96	A	0	16	A	80	A	0	Homo sapiens deiodinase, iodothyronine, type II (DIO2), transcript variant 1, mRNA.
203704_s_at	ras responsive element binding protein 1	RREB1	127	P	117	P	1	97	P	63	M	2	112	P	135	P	1	EST
203706_s_at	frizzled homolog 7 (Drosophila)	FZD7	9	A	22	A	0	28	A	45	A	1	23	A	36	A	1	Homo sapiens frizzled (Drosophila) homolog 7 (FZD7), mRNA.
203707_at	zinc finger protein 263	ZNF263	133	P	198	M	1	115	P	101	A	1	113	P	159	A	1	Homo sapiens zinc finger protein 263 (ZNF263), mRNA.
203709_at	phosphorylase kinase, gamma 2 (testis)	PHKG2	72	A	75	A	1	32	A	15	A	2	72	A	21	A	3	Homo sapiens phosphorylase kinase, gamma 2 (testis) (PHKG2), mRNA.
203710_at	inositol 1,4,5-triphosphate receptor, type 1	ITPR1	33	A	71	M	0	54	P	64	A	1	92	P	99	P	1	Homo sapiens inositol 1,4,5-triphosphate receptor, type 1 (ITPR1), mRNA.
203711_s_at	3-hydroxyisobutyryl-Coenzyme A hydrolase	HIBCH	35	A	5	A	7	36	A	4	A	10	16	A	3	A	5	Homo sapiens 3-hydroxyisobutyryl-Coenzyme A hydrolase (HIBCH), mRNA.
203713_s_at	lethal giant larvae homolog 2 (Drosophila)	LLGL2	155	P	80	P	2	71	A	44	P	2	32	P	18	A	2	Homo sapiens lethal giant larvae (Drosophila) homolog 2 (LLGL2), mRNA.
203714_s_at	tubulin-specific chaperone e	TBCE	506	P	132	A	4	294	P	120	A	2	308	P	98	A	3	Homo sapiens tubulin-specific chaperone e (TBCE), mRNA.
203717_at	dipeptidylpeptidase 4 (CD26, adenosine deaminase complexing protein 2)	DPP4	21	A	166	A	0	118	P	40	A	3	34	A	63	A	1	Homo sapiens dipeptidylpeptidase IV (CD26, adenosine deaminase complexing protein 2) (DPP4), mRNA.
203718_at	neuropathy target esterase	NTE	66	P	262	P	0	73	M	150	P	0	218	P	200	P	1	Homo sapiens neuropathy target esterase (NTE), mRNA.
203719_at	excision repair cross-complementing rodent repair deficiency, complementation group 1 (includes overlapping antisense sequence)	ERCC1	139	A	98	A	1	164	P	141	A	1	197	P	81	A	2	Homo sapiens excision repair cross-complementing rodent repair deficiency, complementation group 1 (includes overlapping antisense sequence) (ERCC1), mRNA.
203722_at	aldehyde dehydrogenase 4 family, member A1	ALDH4A1	12	A	8	A	2	13	A	13	A	1	5	A	8	A	1	Homo sapiens aldehyde dehydrogenase 4 (glutamate gamma-semialdehyde dehydrogenase; pyrroline-5-carboxylate dehydrogenase) (ALDH4), mRNA.
203723_at	inositol 1,4,5-trisphosphate 3-kinase B	ITPKB	38	A	15	A	2	25	A	6	A	4	35	A	8	A	4	Homo sapiens inositol 1,4,5-trisphosphate 3-kinase B (ITPKB), mRNA.
203725_at	growth arrest and DNA-damage-inducible, alpha	GADD45A	86	A	68	A	1	76	P	278	P	0	63	P	143	P	0	Homo sapiens growth arrest and DNA-damage-inducible, alpha (GADD45A), mRNA.
203727_at	superkiller viralicidic activity 2-like (S. cerevisiae)	SKIV2L	222	P	173	P	1	203	A	355	A	1	173	P	238	A	1	Homo sapiens superkiller viralicidic activity 2 (S. cerevisiae homolog)-like (SKIV2L), mRNA.
203728_at	BCL2-antagonist/killer 1	BAK1	98	A	177	P	1	86	A	46	A	2	82	P	143	A	1	Homo sapiens BCL2-antagonistkiller 1 (BAK1), mRNA.
203729_at	epithelial membrane protein 3	EMP3	220	P	1326	P	0	359	P	778	P	0	289	P	889	P	0	Homo sapiens epithelial membrane protein 3 (EMP3), mRNA.
203730_s_at	zinc finger protein 95 homolog (mouse)	ZFP95	62	P	63	A	1	55	A	58	A	1	50	P	4	A	12	EST
203732_at	thyroid hormone receptor interactor 4	TRIP4	194	P	222	P	1	232	P	174	P	1	257	P	255	M	1	Homo sapiens thyroid hormone receptor interactor 4 (TRIP4), mRNA.
203734_at	FOXJ2 forkhead factor	FHX	222	P	222	P	1	160	P	360	P	0	179	P	486	P	0	Homo sapiens FOXJ2 forkhead factor (LOC55810), mRNA.
203739_at	zinc finger protein 217	ZNF217	50	P	121	P	0	196	P	125	P	2	95	P	180	P	1	Homo sapiens zinc finger protein 217 (ZNF217), mRNA.
203740_at	M-phase phosphoprotein 6	MPHOSPH6	322	P	175	A	2	280	P	193	A	1	318	P	208	A	2	Homo sapiens M-phase phosphoprotein 6 (MPHOSPH6), mRNA.
203741_s_at	adenylate cyclase 7	ADCY7	56	A	396	P	0	47	A	162	P	0	310	P	167	P	2	Homo sapiens adenylate cyclase 7 (ADCY7), mRNA.
203743_s_at	thymine-DNA glycosylase	TDG	684	P	203	P	3	270	P	134	P	2	585	P	231	P	3	Homo sapiens thymine-DNA glycosylase (TDG), mRNA.
203744_at	high-mobility group box 3	HMGB3	197	P	89	P	2	163	P	113	P	1	156	P	68	A	2	Homo sapiens high-mobility group (nonhistone chromosomal) protein 4 (HMG4), mRNA.
203745_at	holocytochrome c synthase (cytochrome c heme-lyase)	HCCS	102	P	124	A	1	63	P	62	A	1	72	P	84	A	1	EST
203749_s_at	retinoic acid receptor, alpha	RARA	38	A	189	P	0	21	A	47	A	0	59	P	72	A	1	EST
203752_s_at	jun D proto-oncogene	JUND	859	P	1154	P	1	999	P	1457	P	1	820	P	942	P	1	Homo sapiens jun D proto-oncogene (JUND), mRNA.
203753_at	transcription factor 4	TCF4	20	P	148	P	0	61	P	34	P	2	172	P	40	A	4	Homo sapiens transcription factor 4 (TCF4), mRNA.
203754_s_at	BRF1 homolog, subunit of RNA polymerase III transcription initiation factor IIIB (S. cerevisiae)	BRF1	15	A	15	A	1	15	A	33	A	0	23	A	23	A	1	Homo sapiens TATA box binding protein (TBP)-associated factor, RNA polymerase III, GTF3B subunit 2 (TAF3B2), mRNA.
203755_at	BUB1 budding uninhibited by benzimidazoles 1 homolog beta (yeast)	BUB1B	170	P	74	A	2	112	P	14	A	8	130	P	54	A	2	Homo sapiens budding uninhibited by benzimidazoles 1 (yeast homolog), beta (BUB1B), mRNA.
203757_s_at	carcinoembryonic antigen-related cell adhesion molecule 6 (non-specific cross reacting antigen)	CEACAM6	1376	P	10	A	140	8	A	125	A	0	846	P	24	A	35	Homo sapiens, carcinoembryonic antigen-related cell adhesion molecule 6 (non-specific cross reacting antigen), clone MGC:10467, mRNA, complete cds.
203758_at	cathepsin O	CTSO	129	P	195	P	1	270	P	224	P	1	82	P	214	P	0	EST
203759_at	sialyltransferase 4C (beta-galactoside alpha-2,3-sialyltransferase)	SIAT4C	74	P	53	A	1	10	A	23	A	0	46	A	25	A	2	Homo sapiens sialyltransferase 4C (beta-galactosidase alpha-2,3-sialytransferase) (SIAT4C), mRNA.
203761_at	Src-like-adaptor	SLA	83	A	812	P	0	101	A	270	P	0	482	P	548	P	1	Homo sapiens Src-like-adapter (SLA), mRNA.
203765_at	grancalcin, EF-hand calcium binding protein	GCA	194	P	1848	P	0	232	P	1084	P	0	612	P	903	P	1	Homo sapiens grancalcin (GCL), mRNA.
203766_s_at	leiomodin 1 (smooth muscle)	LMOD1	22	A	9	A	3	9	A	9	A	1	20	A	20	A	1	Homo sapiens leiomodin 1 (smooth muscle) (LMOD1), mRNA.
203767_s_at	steroid sulfatase (microsomal), arylsulfatase C, isozyme S	STS	299	P	33	A	9	24	A	18	A	1	42	P	6	A	7	EST
203771_s_at	biliverdin reductase A	BLVRA	26	A	7	A	4	5	A	5	A	1	6	A	10	A	1	EST
203774_at	5-methyltetrahydrofolate-homocysteine methyltransferase	MTR	128	P	82	P	2	53	A	62	A	1	74	P	65	A	1	Homo sapiens 5-methyltetrahydrofolate-homocysteine methyltransferase (MTR), mRNA.
203775_at	solute carrier family 25, member 13 (citrin)	SLC25A13	118	P	78	P	2	189	P	79	P	2	116	P	32	A	4	Homo sapiens solute carrier family 25, member 13 (citrin) (SLC25A13), mRNA.
203777_s_at	ribosomal protein S6 kinase, 70kDa, polypeptide 2	RPS6KB2	106	A	83	A	1	92	A	124	A	1	72	P	93	A	1	Homo sapiens ribosomal protein S6 kinase, 70kD, polypeptide 2 (RPS6KB2), mRNA.
203778_at	mannosidase, beta A, lysosomal	MANBA	139	A	193	P	1	94	A	112	A	1	710	P	246	P	3	Homo sapiens mannosidase, beta A, lysosomal (MANBA), mRNA.
203780_at	epithelial V-like antigen 1	EVA1	67	P	58	P	1	19	A	32	A	1	34	P	16	A	2	Homo sapiens epithelial V-like antigen 1 (EVA1) mRNA, complete cds.
203781_at	mitochondrial ribosomal protein L33	MRPL33	426	P	268	P	2	493	P	231	P	2	262	P	238	A	1	Homo sapiens chromosome 2 open reading frame 1 (C2ORF1), mRNA.
203782_s_at	polymerase (RNA) mitochondrial (DNA directed)	POLRMT	67	A	117	A	1	76	A	88	A	1	102	A	106	A	1	Homo sapiens polymerase (RNA) mitochondrial (DNA directed) (POLRMT), mRNA.
203787_at	single-stranded DNA binding protein 2	SSBP2	15	A	72	A	0	33	A	59	A	1	79	P	66	A	1	Homo sapiens single-stranded-DNA-binding protein (SSBP2), mRNA.
203788_s_at	sema domain, immunoglobulin domain (Ig), short basic domain, secreted, (semaphorin) 3C	SEMA3C	66	P	81	P	1	44	P	103	P	0	27	P	100	A	0	EST
203790_s_at	translational inhibitor protein p14.5	UK114	83	P	53	A	2	87	P	136	A	1	59	A	117	A	1	EST
203791_at	Dmx-like 1	DMXL1	86	P	63	P	1	79	P	19	A	4	54	P	15	A	4	Homo sapiens Dmx-like 1 (DMXL1), mRNA.
203796_s_at	B-cell CLL/lymphoma 7A	BCL7A	47	P	15	A	3	57	A	38	A	1	35	A	27	A	1	EST
203797_at	visinin-like 1	VSNL1	128	A	115	A	1	78	A	230	A	0	65	A	110	P	1	Homo sapiens visinin-like protein 1 (VSNL1) mRNA, complete cds.
203803_at	prenylcysteine lyase	PCL1	26	A	1	A	24	15	A	2	A	8	1	A	1	A	0	EST
203804_s_at	acid-inducible phosphoprotein	OA48-18	1468	P	1011	P	1	405	P	640	P	1	410	P	301	P	1	Homo sapiens acid-inducible phosphoprotein (OA48-18), mRNA.
203805_s_at	Fanconi anemia, complementation group A	FANCA	58	A	144	A	0	107	A	154	A	1	63	A	86	A	1	EST
203807_x_at	chorionic somatomammotropin hormone 2	CSH2	5	A	5	A	1	2	A	4	A	0	3	A	5	A	1	Homo sapiens chorionic somatomammotropin hormone 2 (CSH2), transcript variant 1, mRNA.
203808_at	v-akt murine thymoma viral oncogene homolog 2	AKT2	5	A	105	A	0	46	A	40	A	1	30	P	28	A	1	Human protein-serinethreonine (AKT2) mRNA, complete cds.
203810_at	DnaJ (Hsp40) homolog, subfamily B, member 4	DNAJB4	90	P	60	A	1	25	P	47	A	1	17	P	20	A	1	EST
203813_s_at	slit homolog 3 (Drosophila)	SLIT3	9	A	23	A	0	13	A	26	A	1	10	A	4	A	2	Homo sapiens slit (Drosophila) homolog 3 (SLIT3), mRNA.
203814_s_at	NAD(P)H dehydrogenase, quinone 2	NQO2	38	A	104	A	0	80	P	221	P	0	343	P	371	P	1	Homo sapiens NAD(P)H menadione oxidoreductase 2, dioxin-inducible (NMOR2), mRNA.
203815_at	glutathione S-transferase theta 1	GSTT1	130	P	10	A	14	7	A	8	A	1	23	A	47	A	0	Homo sapiens glutathione S-transferase theta 1 (GSTT1), mRNA.
203816_at	deoxyguanosine kinase	DGUOK	47	A	5	A	10	28	A	10	A	3	35	A	4	A	9	Homo sapiens deoxyguanosine kinase (DGUOK), mRNA.
203817_at	guanylate cyclase 1, soluble, beta 3	GUCY1B3	48	P	171	P	0	120	P	91	P	1	121	P	137	P	1	EST
203818_s_at	splicing factor 3a, subunit 3, 60kDa	SF3A3	58	P	121	P	0	78	P	64	A	1	52	P	89	A	1	Homo sapiens splicing factor 3a, subunit 3, 60kD (SF3A3), mRNA.
203820_s_at	IGF-II mRNA-binding protein 3	KOC1	6	A	70	P	0	3	A	55	A	0	48	P	45	A	1	Homo sapiens IGF-II mRNA-binding protein 3 (KOC1), mRNA.
203822_s_at	E74-like factor 2 (ets domain transcription factor)	ELF2	93	A	127	A	1	122	P	186	A	1	142	P	96	A	1	Homo sapiens E74-like factor 2 (ets domain transcription factor) (ELF2), mRNA.
203823_at	regulator of G-protein signalling 3	RGS3	210	P	254	A	1	61	A	155	A	0	261	P	200	A	1	Homo sapiens regulator of G-protein signalling 3 (RGS3), mRNA.
203824_at	transmembrane 4 superfamily member 3	TM4SF3	76	A	20	A	4	222	P	22	A	10	1697	P	39	A	43	Homo sapiens transmembrane 4 superfamily member 3 (TM4SF3), mRNA.
203825_at	bromodomain containing 3	BRD3	210	P	192	P	1	142	P	172	P	1	218	P	171	P	1	Homo sapiens bromodomain-containing 3 (BRD3), mRNA.
203826_s_at	phosphatidylinositol transfer protein, membrane-associated	PITPNM	42	A	46	A	1	57	A	171	A	0	110	A	55	A	2	Homo sapiens phosphatidylinositol transfer protein, membrane-associated (PITPNM), mRNA.
203828_s_at	natural killer cell transcript 4	NK4	3	A	7	A	0	6	A	7	A	1	2	A	7	A	0	Homo sapiens natural killer cell transcript 4 (NK4), mRNA.
203830_at	protein kinase Njmu-R1	NJMU-R1	21	A	20	A	1	7	A	2	A	4	10	A	2	A	6	Homo sapiens protein kinase Njmu-R1 (NJMU-R1), mRNA.
203832_at	small nuclear ribonucleoprotein polypeptide F	SNRPF	320	P	121	P	3	373	P	203	P	2	120	P	183	P	1	Homo sapiens small nuclear ribonucleoprotein polypeptide F (SNRPF), mRNA.
203833_s_at	trans-golgi network protein 2	TGOLN2	242	P	266	P	1	96	P	160	P	1	219	P	320	P	1	EST
203835_at	glycoprotein A repetitions predominant	GARP	10	A	16	A	1	6	A	53	A	0	10	A	20	A	1	Homo sapiens glycoprotein A repetitions predominant (GARP), mRNA.
203837_at	mitogen-activated protein kinase kinase kinase 5	MAP3K5	137	P	433	P	0	304	P	260	P	1	338	P	418	P	1	Homo sapiens mitogen-activated protein kinase kinase kinase 5 (MAP3K5), mRNA.
203839_s_at	activated p21cdc42Hs kinase	ACK1	28	A	142	P	0	57	A	127	A	0	224	P	122	A	2	Homo sapiens activated p21cdc42Hs kinase (ACK1), mRNA.
203843_at	ribosomal protein S6 kinase, 90kDa, polypeptide 3	RPS6KA3	9	A	74	A	0	46	P	131	A	0	103	P	119	A	1	EST
203844_at	von Hippel-Lindau syndrome	VHL	12	A	31	P	0	15	A	21	A	1	9	A	30	P	0	Homo sapiens von Hippel-Lindau syndrome (VHL), mRNA.
203845_at	p300/CBP-associated factor	PCAF	80	A	239	P	0	97	P	759	P	0	118	P	212	P	1	EST
203846_at	tripartite motif-containing 32	TRIM32	161	M	87	A	2	59	A	56	A	1	45	A	91	A	0	Homo sapiens, TAT-INTERACTIVE PROTEIN, 72-KD, clone MGC:4116, mRNA, complete cds.
203848_at	A kinase (PRKA) anchor protein 8	AKAP8	112	P	66	A	2	23	A	87	A	0	174	P	63	A	3	Homo sapiens mRNA; cDNA DKFZp586B1222 (from clone DKFZp586B1222); partial cds.
203849_s_at	axonal transport of synaptic vesicles	ATSV	2	A	6	A	0	3	A	8	A	0	7	A	7	A	1	EST
203851_at	insulin-like growth factor binding protein 6	IGFBP6	61	A	9	A	7	24	A	112	A	0	27	A	103	A	0	Homo sapiens insulin-like growth factor binding protein 6 (IGFBP6), mRNA.
203852_s_at	survival of motor neuron 1, telomeric	SMN1	49	P	31	A	2	30	P	31	A	1	36	P	38	P	1	Homo sapiens survival of motor neuron 1, telomeric (SMN1), transcript variant d, mRNA.
203853_s_at	GRB2-associated binding protein 2	GAB2	125	A	353	A	0	140	A	291	A	0	396	M	443	A	1	Homo sapiens GRB2-associated binding protein 2 (GAB2), mRNA.
203854_at	I factor (complement)	IF	24	P	46	P	1	3	A	84	A	0	16	A	35	A	0	Homo sapiens I factor (complement) (IF), mRNA.
203856_at	vaccinia related kinase 1	VRK1	74	A	69	A	1	27	A	61	A	0	67	A	47	A	1	Homo sapiens vaccinia related kinase 1 (VRK1), mRNA.
203857_s_at	for protein disulfide isomerase-related	PDIR	268	P	116	A	2	318	P	132	A	2	114	P	107	A	1	Homo sapiens for protein disulfide isomerase-related (PDIR), mRNA.
203858_s_at	COX10 homolog, cytochrome c oxidase assembly protein, heme A: farnesyltransferase (yeast)	COX10	194	P	167	A	1	230	P	212	A	1	120	A	308	A	0	Homo sapiens COX10 (yeast) homolog, cytochrome c oxidase assembly protein (heme A: farnesyltransferase) (COX10), mRNA.
203859_s_at	paralemmin	PALM	34	A	16	A	2	75	A	196	A	0	40	A	24	A	2	Homo sapiens paralemmin (PALM), mRNA.
203860_at	propionyl Coenzyme A carboxylase, alpha polypeptide	PCCA	56	P	49	A	1	38	A	3	A	12	83	P	50	A	2	Homo sapiens propionyl Coenzyme A carboxylase, alpha polypeptide (PCCA), nuclear gene encoding mitochondrial protein, mRNA.
203862_s_at	actinin, alpha 2	ACTN2	3	A	17	A	0	2	A	8	A	0	9	A	11	A	1	EST
203865_s_at	adenosine deaminase, RNA-specific, B1 (RED1 homolog rat)	ADARB1	15	A	12	A	1	18	A	72	A	0	35	A	9	A	4	Homo sapiens adenosine deaminase, RNA-specific, B1 (homolog of rat RED1) (ADARB1), transcript variant DRABA2b, mRNA.
203867_s_at	hypothetical protein similar to beta-transducin family	FLJ10458	156	M	39	A	4	157	A	19	A	8	69	A	17	A	4	Homo sapiens hypothetical protein similar to beta-transducin family (FLJ10458), mRNA.
203868_s_at	vascular cell adhesion molecule 1	VCAM1	20	P	56	A	0	26	A	91	A	0	24	P	112	P	0	Homo sapiens vascular cell adhesion molecule 1 (VCAM1), mRNA.
203871_at	sentrin/SUMO-specific protease 3	SENP3	16	A	21	A	1	52	A	23	A	2	62	A	71	A	1	Homo sapiens sentrinSUMO-specific protease 3 (SENP3), mRNA.
203872_at	actin, alpha 1, skeletal muscle	ACTA1	12	A	30	A	0	14	A	47	A	0	6	A	15	A	0	Homo sapiens actin, alpha 1, skeletal muscle (ACTA1), mRNA.
203874_s_at	SWI/SNF related, matrix associated, actin dependent regulator of chromatin, subfamily a, member 1	SMARCA1	19	P	24	A	1	127	P	16	A	8	22	P	53	A	0	Homo sapiens SWISNF related, matrix associated, actin dependent regulator of chromatin, subfamily a, member 1 (SMARCA1), mRNA.
203878_s_at	matrix metalloproteinase 11 (stromelysin 3)	MMP11	32	A	38	A	1	11	A	91	A	0	29	A	112	A	0	Homo sapiens matrix metalloproteinase 11 (stromelysin 3) (MMP11), mRNA.
203879_at	phosphoinositide-3-kinase, catalytic, delta polypeptide	PIK3CD	96	P	810	P	0	172	P	639	P	0	787	P	850	P	1	Human phosphatidylinositol 3-kinase catalytic subunit p110delta mRNA, complete cds.
203880_at	COX17 homolog, cytochrome c oxidase assembly protein (yeast)	COX17	583	P	176	P	3	763	P	110	M	7	357	P	144	P	2	Homo sapiens COX17 (yeast) homolog, cytochrome c oxidase assembly protein (COX17), mRNA.
203881_s_at	dystrophin (muscular dystrophy, Duchenne and Becker types)	DMD	11	A	24	A	0	2	A	2	A	1	7	A	18	A	0	Homo sapiens dystrophin (muscular dystrophy, Duchenne and Becker types), includes DXS142, DXS164, DXS206, DXS230, DXS239, DXS268, DXS269, DXS270, DXS272 (DMD), transcript variant Dp427p2, mRNA.
203882_at	interferon-stimulated transcription factor 3, gamma 48kDa	ISGF3G	299	P	508	P	1	225	P	296	A	1	379	P	274	A	1	Homo sapiens interferon-stimulated transcription factor 3, gamma (48kD) (ISGF3G), mRNA.
203886_s_at	fibulin 2	FBLN2	6	A	8	A	1	6	A	21	A	0	3	A	11	A	0	Homo sapiens fibulin 2 (FBLN2), mRNA.
203887_s_at	thrombomodulin	THBD	3	A	103	P	0	2	A	73	A	0	203	P	72	A	3	Homo sapiens thrombomodulin (THBD), mRNA.
203889_at	secretory granule, neuroendocrine protein 1 (7B2 protein)	SGNE1	14	A	35	A	0	25	A	76	A	0	16	A	68	A	0	Homo sapiens secretory granule, neuroendocrine protein 1 (7B2 protein) (SGNE1), mRNA.
203890_s_at	death-associated protein kinase 3	DAPK3	15	A	47	A	0	17	P	26	A	1	6	A	13	A	0	EST
203892_at	WAP four-disulfide core domain 2	WFDC2	52	P	118	A	0	66	P	72	A	1	53	P	116	A	0	Homo sapiens epididymis-specific, whey-acidic protein type, four-disulfide core; putative ovarian carcinoma marker (HE4), mRNA.
203893_at	TAF9 RNA polymerase II, TATA box binding protein (TBP)-associated factor, 32kDa	TAF9	85	P	16	A	5	142	P	73	A	2	58	P	28	A	2	Homo sapiens adrenal gland protein AD-004 (LOC51578), mRNA.
203894_at	tubulin, gamma 2	TUBG2	88	P	84	A	1	28	A	93	A	0	24	M	57	A	0	Homo sapiens tubulin, gamma 2 (TUBG2), mRNA.
203895_at	Homo sapiens mRNA; cDNA DKFZp434E235 (from clone DKFZp434E235)		77	M	11	A	7	31	P	29	A	1	32	P	15	A	2	EST
203898_at	calcitonin gene-related peptide-receptor component protein	RCP9	83	P	74	P	1	49	P	70	A	1	31	A	31	P	1	EST
203901_at	mitogen-activated protein kinase kinase kinase 7 interacting protein 1	MAP3K7IP1	16	A	5	A	3	21	A	8	A	2	37	A	52	A	1	Homo sapiens transforming growth factor beta-activated kinase-binding protein 1 (TAB1), mRNA.
203903_s_at	hephaestin	HEPH	36	A	38	A	1	23	A	63	A	0	118	P	34	A	3	Homo sapiens hephaestin (HEPH), mRNA.
203904_x_at	kangai 1 (suppression of tumorigenicity 6, prostate; CD82 antigen (R2 leukocyte antigen, antigen detected by monoclonal and antibody IA4))	KAI1	120	A	41	A	3	87	A	59	A	1	34	A	43	A	1	Homo sapiens kangai 1 (suppression of tumorigenicity 6, prostate; CD82 antigen (R2 leukocyte antigen, antigen detected by monoclonal and antibody IA4)) (KAI1), mRNA.
203905_at	poly(A)-specific ribonuclease (deadenylation nuclease)	PARN	463	P	95	A	5	295	P	98	A	3	286	P	207	A	1	Homo sapiens poly(A)-specific ribonuclease (deadenylation nuclease) (PARN), mRNA.
203908_at	solute carrier family 4, sodium bicarbonate cotransporter, member 4	SLC4A4	22	A	43	P	1	262	P	26	A	10	9	A	68	A	0	Homo sapiens solute carrier family 4, sodium bicarbonate cotransporter, member 4 (SLC4A4), mRNA.
203909_at	solute carrier family 9 (sodium/hydrogen exchanger), isoform 6	SLC9A6	62	P	157	P	0	113	P	204	P	1	165	P	250	A	1	Homo sapiens solute carrier family 9 (sodiumhydrogen exchanger), isoform 6 (SLC9A6), mRNA.
203910_at	PTPL1-associated RhoGAP 1	PARG1	84	P	72	P	1	246	P	27	A	9	27	P	107	P	0	Homo sapiens PTPL1-associated RhoGAP 1 (PARG1), mRNA.
203911_at	RAP1, GTPase activating protein 1	RAP1GA1	264	P	52	A	5	192	P	247	M	1	53	A	143	A	0	Homo sapiens RAP1, GTPase activating protein 1 (RAP1GA1), mRNA.
203912_s_at	deoxyribonuclease I-like 1	DNASE1L1	142	P	67	A	2	76	A	16	A	5	334	P	24	A	14	Homo sapiens deoxyribonuclease I-like 1 (DNASE1L1), mRNA.
203915_at	chemokine (C-X-C motif) ligand 9	CXCL9	99	P	124	A	1	499	P	188	A	3	100	P	228	P	0	Homo sapiens monokine induced by gamma interferon (MIG), mRNA.
203916_at	N-deacetylase/N-sulfotransferase (heparan glucosaminyl) 2	NDST2	24	A	90	A	0	55	A	89	A	1	328	P	141	A	2	Homo sapiens N-deacetylaseN-sulfotransferase (heparan glucosaminyl) 2 (NDST2), mRNA.
203917_at	coxsackie virus and adenovirus receptor	CXADR	326	P	54	A	6	601	P	75	A	8	273	P	13	A	20	Homo sapiens coxsackie virus and adenovirus receptor (CXADR), mRNA.
203918_at	protocadherin 1 (cadherin-like 1)	PCDH1	33	A	17	A	2	11	A	39	A	0	29	A	13	A	2	Homo sapiens protocadherin 1 (cadherin-like 1) (PCDH1), mRNA.
203919_at	transcription elongation factor A (SII), 2	TCEA2	6	A	5	A	1	34	A	12	A	3	36	A	12	A	3	Homo sapiens transcription elongation factor A (SII), 2 (TCEA2), mRNA.
203920_at	nuclear receptor subfamily 1, group H, member 3	NR1H3	97	A	38	A	3	55	A	15	A	4	82	M	8	A	10	Homo sapiens nuclear receptor subfamily 1, group H, member 3 (NR1H3), mRNA.
203921_at	carbohydrate (N-acetylglucosamine-6-O) sulfotransferase 2	CHST2	20	A	101	P	0	41	P	113	M	0	106	P	142	P	1	Homo sapiens carbohydrate (chondroitin 6keratan) sulfotransferase 2 (CHST2), mRNA.
203923_s_at	cytochrome b-245, beta polypeptide (chronic granulomatous disease)	CYBB	78	P	295	P	0	43	A	154	P	0	401	P	188	P	2	Homo sapiens cytochrome b-245, beta polypeptide (chronic granulomatous disease) (CYBB), mRNA.
203924_at	glutathione S-transferase A1	GSTA1	16	A	42	A	0	8	A	34	A	0	9	A	46	A	0	Homo sapiens glutathione S-transferase A2 (GSTA2), mRNA.
203925_at	glutamate-cysteine ligase, modifier subunit	GCLM	34	P	47	P	1	53	P	60	A	1	31	P	43	A	1	Homo sapiens glutamate-cysteine ligase, modifier subunit (GCLM), mRNA.
203927_at	nuclear factor of kappa light polypeptide gene enhancer in B-cells inhibitor, epsilon	NFKBIE	80	P	125	A	1	110	A	138	A	1	194	P	100	A	2	Homo sapiens nuclear factor of kappa light polypeptide gene enhancer in B-cells inhibitor, epsilon (NFKBIE), mRNA.
203929_s_at	microtubule-associated protein tau	MAPT	192	P	39	A	5	90	A	77	A	1	17	A	56	A	0	EST
203931_s_at	mitochondrial ribosomal protein L12	MRPL12	282	P	54	A	5	243	P	118	A	2	74	P	46	A	2	Homo sapiens mitochondrial ribosomal protein L12 (MRPL12), mRNA.
203932_at	major histocompatibility complex, class II, DM beta	HLA-DMB	208	P	411	P	1	426	P	514	P	1	598	P	405	P	1	Homo sapiens major histocompatibility complex, class II, DM beta (HLA-DMB), mRNA.
203934_at	kinase insert domain receptor (a type III receptor tyrosine kinase)	KDR	20	A	44	A	0	30	A	10	A	3	9	A	24	A	0	Homo sapiens kinase insert domain receptor (a type III receptor tyrosine kinase) (KDR), mRNA.
203935_at	activin A receptor, type I	ACVR1	74	P	106	P	1	65	P	71	A	1	70	P	63	A	1	Homo sapiens activin A receptor, type I (ACVR1), mRNA.
203936_s_at	matrix metalloproteinase 9 (gelatinase B, 92kDa gelatinase, 92kDa type IV collagenase)	MMP9	51	P	501	P	0	283	P	2128	P	0	1550	P	2623	P	1	Homo sapiens matrix metalloproteinase 9 (gelatinase B, 92kD gelatinase, 92kD type IV collagenase) (MMP9), mRNA.
203938_s_at	TATA box binding protein (TBP)-associated factor, RNA polymerase I, C, 110kDa	TAF1C	64	A	73	A	1	10	A	49	A	0	97	P	37	A	3	Homo sapiens TATA box binding protein (TBP)-associated factor, RNA polymerase I, C, 110kD (TAF1C), mRNA.
203939_at	5'-nucleotidase, ecto (CD73)	NT5E	15	A	8	A	2	5	A	57	A	0	14	A	6	A	2	Homo sapiens 5 nucleotidase (CD73) (NT5), mRNA.
203942_s_at	MAP/microtubule affinity-regulating kinase 2	MARK2	32	M	20	A	2	10	A	23	A	0	27	A	11	A	3	Homo sapiens ELKL motif kinase (EMK1), transcript variant 1, mRNA.
203943_at	kinesin family member 3B	KIF3B	130	P	74	P	2	117	P	73	M	2	117	P	78	P	1	Homo sapiens kinesin family member 3B (KIF3B), mRNA.
203944_x_at	butyrophilin, subfamily 2, member A1	BTN2A1	367	P	423	P	1	191	P	448	P	0	591	P	596	P	1	Homo sapiens butyrophilin, subfamily 2, member A1 (BTN2A1), mRNA.
203945_at	arginase, type II	ARG2	92	P	258	P	0	300	P	340	P	1	63	P	304	P	0	Homo sapiens arginase, type II (ARG2), nuclear gene encoding mitochondrial protein, mRNA.
203947_at	cleavage stimulation factor, 3' pre-RNA, subunit 3, 77kDa	CSTF3	223	P	235	P	1	218	P	94	P	2	214	P	261	P	1	Homo sapiens cleavage stimulation factor, 3 pre-RNA, subunit 3, 77kD (CSTF3), mRNA.
203948_s_at	myeloperoxidase	MPO	18	A	13	A	1	4	A	60	A	0	24	A	63	A	0	Human myeloperoxidase mRNA, complete cds.
203950_s_at	chloride channel 6	CLCN6	30	A	110	A	0	15	A	26	A	1	103	A	138	A	1	Homo sapiens chloride channel 6 (CLCN6), transcript variant ClC-6a, mRNA.
203951_at	calponin 1, basic, smooth muscle	CNN1	6	A	7	A	1	21	A	33	A	1	4	A	12	A	0	Homo sapiens calponin 1, basic, smooth muscle (CNN1), mRNA.
203952_at	activating transcription factor 6	ATF6	17	A	17	A	1	62	A	38	A	2	72	P	188	A	0	Homo sapiens activating transcription factor 6 (ATF6), mRNA.
203953_s_at	claudin 3	CLDN3	94	P	2	A	47	88	A	3	A	28	2	A	2	A	1	EST
203957_at	E2F transcription factor 6	E2F6	51	A	8	A	6	9	A	14	A	1	32	A	11	A	3	Homo sapiens E2F transcription factor 6 (E2F6), mRNA.
203960_s_at	HSPCO34 protein	LOC51668	3	A	37	A	0	24	A	4	A	7	17	A	2	A	10	Homo sapiens HSPCO34 protein (LOC51668), mRNA.
203961_at	nebulette	NEBL	331	P	80	M	4	30	A	34	A	1	95	P	47	A	2	Human DNA sequence from clone RP11-56H7 on chromosome 10. Contains ESTs, STSs and GSSs. Contains the gene for the nebulette protein (NEBL, actin-binding Z-disc protein)
[truncated: 6,797 more rows]

## Sheet: C) Selected Genes
Affy ID	Gene Name	Gene Symbol	BrCa Blood Signal	BrCa Blood Detection	BrCa CTC Signal	BrCa CTC Detection	BrCa Ratio	BrCa Log2 Ratio	PrCa Blood Signal	PrCa Blood Detection	PrCa CTC Signal	PrCa CTC Detection	PrCa Ratio	PrCa Log2 Ratio	CoCa Blood Signal	CoCa Blood Detection	CoCa CTC Signal	CoCa CTC Detection	CoCa Ratio	CoCa Log2 Ratio	Descriptions
205979_at	secretoglobin, family 2A, member 1	SCGB2A1	1.5	A	1207.4	P	804.933	9.65273	2.6	A	1.2	A	0.461538	-1.11548	3.1	A	0.8	A	0.258065	-1.9542	gb:NM_002407.1 /DEF=Homo sapiens mammaglobin 2 (MGB2), mRNA. /FEA=mRNA /GEN=MGB2 /PROD=mammaglobin 2 /DB_XREF=gi:4505170 /UG=Hs.97644 mammaglobin 2 /FL=gb:AF071219.1 gb:NM_002407.1
202575_at	cellular retinoic acid binding protein 2	CRABP2	8	A	4338	P	542.25	9.08281	81.6	A	82.5	A	1.01103	0.015825	100.2	A	7.3	A	0.0728543	-3.77884	gb:NM_001878.2 /DEF=Homo sapiens cellular retinoic acid-binding protein 2 (CRABP2), mRNA. /FEA=mRNA /GEN=CRABP2 /PROD=cellular retinoic acid-binding protein 2 /DB_XREF=gi:6382069 /UG=Hs.183650 cellular retinoic acid-binding protein 2 /FL=gb:BC001109.1 gb
209016_s_at	keratin 7	KRT7	2.4	A	1296.5	P	540.208	9.07737	8.9	A	4.7	A	0.52809	-0.921145	6.7	A	2.7	A	0.402985	-1.3112	gb:BC002700.1 /DEF=Homo sapiens, Similar to keratin 7, clone MGC:3625, mRNA, complete cds. /FEA=mRNA /PROD=Similar to keratin 7 /DB_XREF=gi:12803726 /UG=Hs.23881 keratin 7 /FL=gb:BC002700.1 gb:NM_005556.1
205916_at	S100 calcium binding protein A7 (psoriasin 1)	S100A7	8.2	A	3653.9	P	445.598	8.7996	12	A	9.7	A	0.808333	-0.306978	8.6	A	4	A	0.465116	-1.10434	gb:NM_002963.2 /DEF=Homo sapiens S100 calcium-binding protein A7 (psoriasin 1) (S100A7), mRNA. /FEA=mRNA /GEN=S100A7 /PROD=S100 calcium-binding protein A7 /DB_XREF=gi:9845518 /UG=Hs.112408 S100 calcium-binding protein A7 (psoriasin 1) /FL=gb:M86757.1 gb:
206799_at	secretoglobin, family 1D, member 2	SCGB1D2	9.4	A	3221.6	P	342.723	8.4209	5.7	A	9.5	A	1.66667	0.736966	7.7	A	10.8	A	1.4026	0.488101	gb:NM_006551.2 /DEF=Homo sapiens lipophilin B (uteroglobin family member), prostatein-like (LPHB), mRNA. /FEA=mRNA /GEN=LPHB /PROD=lipophilin B precursor /DB_XREF=gi:10947028 /UG=Hs.204096 lipophilin B (uteroglobin family member), prostatein-like /FL=gb:
205980_s_at	Rho GTPase activating protein 8	ARHGAP8	1.9	A	306.2	P	161.158	7.33233	12.6	A	90.4	A	7.1746	2.8429	17.1	A	28.2	A	1.64912	0.721699	gb:NM_015366.1 /DEF=Homo sapiens Rho GTPase activating protein 8 (ARHGAP8), mRNA. /FEA=mRNA /GEN=ARHGAP8 /PROD=Rho GTPase activating protein 8 /DB_XREF=gi:7656903 /UG=Hs.102336 Rho GTPase activating protein 8 /FL=gb:NM_015366.1
204734_at	keratin 15	KRT15	5	A	793.4	P	158.68	7.30998	7.1	A	2.1	A	0.295775	-1.75743	6	A	1.6	A	0.266667	-1.90689	gb:NM_002275.1 /DEF=Homo sapiens keratin 15 (KRT15), mRNA. /FEA=mRNA /GEN=KRT15 /PROD=keratin 15 /DB_XREF=gi:4504914 /UG=Hs.80342 keratin 15 /FL=gb:BC002641.1 gb:NM_002275.1
214451_at	transcription factor AP-2 beta (activating enhancer binding protein 2 beta)	TFAP2B	3.1	A	490.6	P	158.258	7.30614	8.2	A	6.2	A	0.756098	-0.403356	12.7	A	14.7	A	1.15748	0.210988	Consensus includes gb:NM_003221.1 /DEF=Homo sapiens transcription factor AP-2 beta (activating enhancer-binding protein 2 beta) (TFAP2B), mRNA. /FEA=CDS /GEN=TFAP2B /PROD=transcription factor AP-2 beta (activatingenhancer-binding protein 2 beta) /DB_XREF
204818_at	hydroxysteroid (17-beta) dehydrogenase 2	HSD17B2	3.5	A	353.3	P	100.943	6.6574	2.8	A	1.5	A	0.535714	-0.900464	16	A	0.5	A	0.03125	-5	gb:NM_002153.1 /DEF=Homo sapiens hydroxysteroid (17-beta) dehydrogenase 2 (HSD17B2), mRNA. /FEA=mRNA /GEN=HSD17B2 /PROD=hydroxysteroid (17-beta) dehydrogenase 2 /DB_XREF=gi:4504502 /UG=Hs.155109 hydroxysteroid (17-beta) dehydrogenase 2 /FL=gb:L11708.1 gb
204041_at	monoamine oxidase B	MAOB	15.4	A	1531	P	99.4156	6.6354	10.1	A	28.9	A	2.86139	1.51671	10.2	A	5	A	0.490196	-1.02857	gb:NM_000898.1 /DEF=Homo sapiens monoamine oxidase B (MAOB), nuclear gene encoding mitochondrial protein, mRNA. /FEA=mRNA /GEN=MAOB /PROD=monoamine oxidase B /DB_XREF=gi:4505092 /UG=Hs.82163 monoamine oxidase B /FL=gb:M69177.1 gb:NM_000898.1
205829_at	hydroxysteroid (17-beta) dehydrogenase 1	HSD17B1	2.3	A	221.5	P	96.3043	6.58953	7.6	A	3.9	A	0.513158	-0.962525	3.3	A	11.1	A	3.36364	1.75002	gb:NM_000413.1 /DEF=Homo sapiens hydroxysteroid (17-beta) dehydrogenase 1 (HSD17B1), mRNA. /FEA=mRNA /GEN=HSD17B1 /PROD=hydroxysteroid (17-beta) dehydrogenase 1 /DB_XREF=gi:4504500 /UG=Hs.85279 hydroxysteroid (17-beta) dehydrogenase 1 /FL=gb:M36263.1 gb:
204400_at	embryonal Fyn-associated substrate	EFS	1.4	A	125.1	P	89.3571	6.48151	38.3	A	14.6	A	0.381201	-1.39138	19	A	12.2	A	0.642105	-0.639118	gb:NM_005864.1 /DEF=Homo sapiens signal transduction protein (SH3 containing) (EFS2), mRNA. /FEA=mRNA /GEN=EFS2 /PROD=signal transduction protein (SH3 containing) /DB_XREF=gi:5031680 /UG=Hs.24587 signal transduction protein (SH3 containing) /FL=gb:AB0014
203963_at	carbonic anhydrase XII	CA12	14.5	A	1232	P	84.9655	6.40881	61.6	A	55.2	A	0.896104	-0.158262	52.1	A	39.9	A	0.765835	-0.384895	gb:NM_001218.2 /DEF=Homo sapiens carbonic anhydrase XII (CA12), mRNA. /FEA=mRNA /GEN=CA12 /PROD=carbonic anhydrase XII precursor /DB_XREF=gi:9951924 /UG=Hs.5338 carbonic anhydrase XII /FL=gb:AF037335.1 gb:AF051882.1 gb:NM_001218.2
221024_s_at	solute carrier family 2 (facilitated glucose transporter), member 10	SLC2A10	5.7	A	460.3	P	80.7544	6.33547	7.4	A	55.2	A	7.45946	2.89907	12.2	A	8.3	A	0.680328	-0.555698	gb:NM_030777.1 /DEF=Homo sapiens solute carrier family 2 (facilitated glucose transporter), member 10 (SLC2A10), mRNA. /FEA=mRNA /GEN=SLC2A10 /PROD=solute carrier family 2 (facilitated glucosetransporter), member 10 /DB_XREF=gi:13540546 /FL=gb:NM_030777.
201015_s_at	junction plakoglobin	JUP	7.7	A	560.5	P	72.7922	6.18571	18	A	32.8	A	1.82222	0.865699	16.4	A	100.5	A	6.12805	2.61543	gb:NM_021991.1 /DEF=Homo sapiens junction plakoglobin (JUP), transcript variant 2, mRNA. /FEA=mRNA /GEN=JUP /PROD=junction plakoglobin, isoform 1 /DB_XREF=gi:12056467 /UG=Hs.2340 junction plakoglobin /FL=gb:NM_021991.1 gb:BC000441.1
206509_at	prolactin-induced protein	PIP	34.2	A	2299.9	P	67.2485	6.07143	97.7	A	39.2	A	0.401228	-1.3175	36.8	A	41.3	A	1.12228	0.166436	gb:NM_002652.1 /DEF=Homo sapiens prolactin-induced protein (PIP), mRNA. /FEA=mRNA /GEN=PIP /PROD=prolactin-induced protein /DB_XREF=gi:4505820 /UG=Hs.99949 prolactin-induced protein /FL=gb:J03460.1 gb:NM_002652.1
41660_at	cadherin, EGF LAG seven-pass G-type receptor 1 (flamingo homolog, Drosophila)	CELSR1	2.5	A	163.1	P	65.24	6.02768	7.7	A	2.2	A	0.285714	-1.80735	7.8	A	10.7	A	1.37179	0.456065	Cluster Incl. AL031588:dJ1163J1.1 (ortholog of mouse transmembrane receptor Celsr1 (KIAA0279 LIKE EGF-like domain containing protein similar to rat MEG /cds=(0,4433) /gb=AL031588 /gi=4007108 /ug=Hs.123043 /len=6438
206378_at	secretoglobin, family 2A, member 2	SCGB2A2	100	P	6231	P	62.31	5.96139	52.9	A	7	A	0.132325	-2.91784	62.1	A	0.8	A	0.0128824	-6.27845	gb:NM_002411.1 /DEF=Homo sapiens mammaglobin 1 (MGB1), mRNA. /FEA=mRNA /GEN=MGB1 /PROD=mammaglobin 1 /DB_XREF=gi:4505168 /UG=Hs.46452 mammaglobin 1 /FL=gb:U33147.1 gb:NM_002411.1
220414_at	calmodulin-like skin protein	CLSP	12.2	A	645.6	P	52.918	5.72569	13.8	A	8.6	A	0.623188	-0.68226	60.4	A	6.9	A	0.114238	-3.12988	gb:NM_017422.2 /DEF=Homo sapiens calmodulin-like skin protein (CLSP), mRNA. /FEA=mRNA /GEN=CLSP /PROD=calmodulin-like skin protein /DB_XREF=gi:13699870 /UG=Hs.180142 calmodulin-like skin protein /FL=gb:NM_017422.2 gb:AF172852.1
205319_at	prostate stem cell antigen	PSCA	9.8	A	501.5	P	51.1735	5.67732	5.2	A	1.7	A	0.326923	-1.61298	7.8	A	0.9	A	0.115385	-3.11548	gb:NM_005672.1 /DEF=Homo sapiens prostate stem cell antigen (PSCA), mRNA. /FEA=mRNA /GEN=PSCA /PROD=prostate stem cell antigen /DB_XREF=gi:5031994 /UG=Hs.20166 prostate stem cell antigen /FL=gb:AF043498.1 gb:NM_005672.1
203953_s_at	claudin 3	CLDN3	2	A	94.3	P	47.15	5.55919	3.2	A	88.3	A	27.5938	4.78627	1.9	A	1.5	A	0.789474	-0.341037	Consensus includes gb:BE791251 /FEA=EST /DB_XREF=gi:10212449 /DB_XREF=est:601583966F1 /CLONE=IMAGE:3938249 /UG=Hs.25640 claudin 3 /FL=gb:AB000714.1 gb:NM_001306.1
221872_at	retinoic acid receptor responder (tazarotene induced) 1	RARRES1	5.7	A	267.8	P	46.9825	5.55405	63.7	A	6.8	A	0.10675	-3.22769	11.1	A	33.8	A	3.04505	1.60646	Consensus includes gb:AI669229 /FEA=EST /DB_XREF=gi:4834003 /DB_XREF=est:wc13e06.x1 /CLONE=IMAGE:2315074 /UG=Hs.82547 retinoic acid receptor responder (tazarotene induced) 1
218995_s_at	endothelin 1	EDN1	8.5	A	390.7	P	45.9647	5.52245	36.9	A	145.2	A	3.93496	1.97635	15.8	A	37.6	A	2.37975	1.25081	gb:NM_001955.1 /DEF=Homo sapiens endothelin 1 (EDN1), mRNA. /FEA=mRNA /GEN=EDN1 /PROD=endothelin 1 /DB_XREF=gi:4503460 /UG=Hs.2271 endothelin 1 /FL=gb:NM_001955.1
203407_at	periplakin	PPL	4.1	A	186.1	P	45.3902	5.50431	6.5	A	71.3	A	10.9692	3.45539	14.2	A	95.5	A	6.72535	2.74961	gb:NM_002705.1 /DEF=Homo sapiens periplakin (PPL), mRNA. /FEA=mRNA /GEN=PPL /PROD=periplakin /DB_XREF=gi:4505992 /UG=Hs.74304 periplakin /FL=gb:AF001691.1 gb:NM_002705.1
205473_at	ATPase, H+ transporting, lysosomal 56/58kDa, V1 subunit B, isoform 1 (Renal tubular acidosis with deafness)	ATP6V1B1	5.8	A	182.7	P	31.5	4.97728	15.1	A	6.1	A	0.403974	-1.30767	5.6	A	3.9	A	0.696429	-0.521953	gb:NM_001692.1 /DEF=Homo sapiens ATPase, H+ transporting, lysosomal (vacuolar proton pump), beta polypeptide, 5658kD, isoform 1 (ATP6B1), mRNA. /FEA=mRNA /GEN=ATP6B1 /PROD=ATPase, H+ transporting, lysosomal (vacuolarproton pump), beta polypeptide, 5658kD
202357_s_at	B-factor, properdin	BF	57.6	A	1605	P	27.8646	4.80036	8.2	A	33.4	A	4.07317	2.02615	5	A	25	A	5	2.32193	gb:NM_001710.1 /DEF=Homo sapiens B-factor, properdin (BF), mRNA. /FEA=mRNA /GEN=BF /PROD=B-factor, properdin /DB_XREF=gi:4502396 /UG=Hs.69771 B-factor, properdin /FL=gb:BC004143.1 gb:L15702.1 gb:NM_001710.1 gb:S67310.1
202212_at	pescadillo homolog 1, containing BRCT domain (zebrafish)	PES1	8.1	A	225	P	27.7778	4.79586	8.1	A	62.2	A	7.67901	2.94092	8.8	A	72.7	A	8.26136	3.04638	gb:NM_014303.1 /DEF=Homo sapiens pescadillo (zebrafish) homolog 1, containing BRCT domain (PES1), mRNA. /FEA=mRNA /GEN=PES1 /PROD=pescadillo (zebrafish) homolog 1, containingBRCT domain /DB_XREF=gi:7657454 /UG=Hs.13501 pescadillo (zebrafish) homolog 1, c
209587_at	paired-like homeodomain transcription factor 1	PITX1	2.6	A	66.5	P	25.5769	4.67677	8.4	A	5.7	A	0.678571	-0.559427	58.8	A	3	A	0.0510204	-4.29278	gb:U70370.1 /DEF=Human hindlimb expressed homeobox protein backfoot (Bft) mRNA, complete cds. /FEA=mRNA /GEN=Bft /PROD=hindlimb expressed homeobox protein backfoot /DB_XREF=gi:1870670 /UG=Hs.84136 paired-like homeodomain transcription factor 1 /FL=gb:BC0
204379_s_at	fibroblast growth factor receptor 3 (achondroplasia, thanatophoric dwarfism)	FGFR3	8.5	A	212.7	P	25.0235	4.64521	9	A	33.9	A	3.76667	1.91329	60.3	A	54.6	A	0.905473	-0.143257	gb:NM_000142.2 /DEF=Homo sapiens fibroblast growth factor receptor 3 (achondroplasia, thanatophoric dwarfism) (FGFR3), transcript variant 1, mRNA. /FEA=mRNA /GEN=FGFR3 /PROD=fibroblast growth factor receptor 3, isoform 1precursor /DB_XREF=gi:13112046 /UG
218677_at	S100 calcium binding protein A14	S100A14	104.6	A	2484.9	P	23.7562	4.57023	107.8	A	33.4	A	0.309833	-1.69044	120.1	A	141	P	1.17402	0.231459	gb:NM_020672.1 /DEF=Homo sapiens S100-type calcium binding protein A14 (LOC57402), mRNA. /FEA=mRNA /GEN=LOC57402 /PROD=S100-type calcium binding protein A14 /DB_XREF=gi:10190711 /UG=Hs.288998 S100-type calcium binding protein A14 /FL=gb:NM_020672.1 gb:BC
209183_s_at	decidual protein induced by progesterone	DEPP	13.3	A	295.2	P	22.1955	4.47219	19.6	A	222.2	A	11.3367	3.50293	14.8	A	14.1	A	0.952703	-0.069902	gb:AL136653.1 /DEF=Homo sapiens mRNA; cDNA DKFZp564P1263 (from clone DKFZp564P1263); complete cds. /FEA=mRNA /GEN=DKFZp564P1263 /PROD=hypothetical protein /DB_XREF=gi:6807650 /UG=Hs.93675 decidual protein induced by progesterone /FL=gb:AB022718.1 gb:NM_0
218976_at	J domain containing protein 1	JDP1	18	A	381.1	P	21.1722	4.4041	18.3	A	58.5	A	3.19672	1.67659	11.4	A	7	A	0.614035	-0.703607	gb:NM_021800.1 /DEF=Homo sapiens J domain containing protein 1 (JDP1), mRNA. /FEA=mRNA /GEN=JDP1 /PROD=J domain containing protein 1 /DB_XREF=gi:11141870 /UG=Hs.260720 J domain containing protein 1 /FL=gb:NM_021800.1 gb:AF176012.1
36499_at	cadherin, EGF LAG seven-pass G-type receptor 2 (flamingo homolog, Drosophila)	CELSR2	14.2	A	290.5	P	20.4577	4.35458	58.2	A	21	A	0.360825	-1.47063	57.8	A	12.5	A	0.216263	-2.20914	Cluster Incl. D87469:Human mRNA for KIAA0279 gene, partial cds /cds=(0,7226) /gb=D87469 /gi=1665820 /ug=Hs.57652 /len=8924
208165_s_at	protease, serine, 16 (thymus)	PRSS16	11.6	A	233.1	P	20.0948	4.32875	11.8	A	48	A	4.0678	2.02425	6.4	A	18.1	A	2.82812	1.49985	gb:NM_005865.1 /DEF=Homo sapiens protease, serine, 16 (thymus) (PRSS16), mRNA. /FEA=mRNA /GEN=PRSS16 /PROD=protease, serine, 16 (thymus) /DB_XREF=gi:5031992 /UG=Hs.274407 protease, serine, 16 (thymus) /FL=gb:AF052514.1 gb:NM_005865.1
207621_s_at	phosphatidylethanolamine N-methyltransferase	PEMT	6.2	A	119.7	P	19.3065	4.27101	59.6	A	96.5	A	1.61913	0.695217	24.7	A	61.3	A	2.48178	1.31138	gb:NM_007169.1 /DEF=Homo sapiens phosphatidylethanolamine N-methyltransferase (PEMT), mRNA. /FEA=mRNA /GEN=PEMT /PROD=phosphatidylethanolamine N-methyltransferase /DB_XREF=gi:6005827 /UG=Hs.15192 phosphatidylethanolamine N-methyltransferase /FL=gb:AB0298
204284_at	protein phosphatase 1, regulatory (inhibitor) subunit 3C	PPP1R3C	7.5	A	139.8	P	18.64	4.22033	38.1	A	11	A	0.288714	-1.79229	14.9	A	21.4	A	1.43624	0.522298	Consensus includes gb:N26005 /FEA=EST /DB_XREF=gi:1140353 /DB_XREF=est:yx88f04.s1 /CLONE=IMAGE:268831 /UG=Hs.303090 protein phosphatase 1, regulatory (inhibitor) subunit 5 /FL=gb:NM_005398.1
203029_s_at	protein tyrosine phosphatase, receptor type, N polypeptide 2	PTPRN2	11.4	A	210.2	P	18.4386	4.20466	12.9	A	64.7	A	5.0155	2.32639	20.4	A	34.9	A	1.71078	0.774658	gb:NM_002847.1 /DEF=Homo sapiens protein tyrosine phosphatase, receptor type, N polypeptide 2 (PTPRN2), mRNA. /FEA=mRNA /GEN=PTPRN2 /PROD=protein tyrosine phosphatase, receptor type, Npolypeptide 2 /DB_XREF=gi:11386148 /UG=Hs.74624 protein tyrosine phosp
204679_at	potassium channel, subfamily K, member 1	KCNK1	30	A	527.7	P	17.59	4.13668	26.5	A	57.7	A	2.17736	1.12258	13.2	A	42	A	3.18182	1.66985	gb:NM_002245.1 /DEF=Homo sapiens potassium channel, subfamily K, member 1 (TWIK-1) (KCNK1), mRNA. /FEA=mRNA /GEN=KCNK1 /PROD=potassium channel, subfamily K, member 1(TWIK-1) /DB_XREF=gi:4504846 /UG=Hs.79351 potassium channel, subfamily K, member 1 (TWIK-
202871_at	TNF receptor-associated factor 4	TRAF4	8.4	A	145.1	P	17.2738	4.11051	59.3	A	124.6	A	2.10118	1.0712	10.7	A	27	A	2.52336	1.33535	gb:NM_004295.1 /DEF=Homo sapiens TNF receptor-associated factor 4 (TRAF4), mRNA. /FEA=mRNA /GEN=TRAF4 /PROD=TNF receptor-associated factor 4 /DB_XREF=gi:4759251 /UG=Hs.8375 TNF receptor-associated factor 4 /FL=gb:BC001769.1 gb:NM_004295.1
220625_s_at	E74-like factor 5 (ets domain transcription factor)	ELF5	14.8	A	246.6	P	16.6622	4.0585	52.3	A	48.1	A	0.919694	-0.120774	6.7	A	8	A	1.19403	0.255839	gb:AF115403.1 /DEF=Homo sapiens Ets transcription factor ESE-2b mRNA, complete cds. /FEA=mRNA /PROD=Ets transcription factor ESE-2b /DB_XREF=gi:4559274 /UG=Hs.11713 E74-like factor 5 (ets domain transcription factor) /FL=gb:AF049703.1 gb:NM_001422.1 gb:AF
823_at	chemokine (C-X3-C motif) ligand 1	CX3CL1	73	A	1155	P	15.8219	3.98385	39.2	A	50.5	A	1.28827	0.36543	44	A	37	A	0.840909	-0.249978	U84487 /FEATURE= /DEFINITION=HSU84487 Human CX3C chemokine precursor, mRNA, alternatively spliced, complete cds
207861_at	chemokine (C-C motif) ligand 22	CCL22	34.5	A	539.9	P	15.6493	3.96802	10.4	A	9.4	A	0.903846	-0.145851	21.9	A	8.8	A	0.401826	-1.31536	gb:NM_002990.1 /DEF=Homo sapiens small inducible cytokine subfamily A (Cys-Cys), member 22 (SCYA22), mRNA. /FEA=mRNA /GEN=SCYA22 /PROD=small inducible cytokine subfamily A (Cys-Cys),member 22 /DB_XREF=gi:4506836 /UG=Hs.97203 small inducible cytokine subf
205937_at	cell growth regulatory with EF-hand domain	CGR11	6.4	A	94.8	P	14.8125	3.88874	6.8	A	23.9	A	3.51471	1.8134	9.3	A	12.7	A	1.36559	0.449526	gb:NM_006569.1 /DEF=Homo sapiens cell growth regulatory with EF-hand domain (CGR11), mRNA. /FEA=mRNA /GEN=CGR11 /PROD=cell growth regulatory with EF-hand domain /DB_XREF=gi:5729762 /UG=Hs.159525 cell growth regulatory with EF-hand domain /FL=gb:U66468.1
207813_s_at	ferredoxin reductase	FDXR	8	A	117.7	P	14.7125	3.87897	4.6	A	7.6	A	1.65217	0.724366	7.8	A	29	A	3.71795	1.89451	gb:NM_004110.2 /DEF=Homo sapiens ferredoxin reductase (FDXR), transcript variant 2, nuclear gene encoding mitochondrial protein, mRNA. /FEA=mRNA /GEN=FDXR /PROD=ferredoxin reductase isoform 2 precursor /DB_XREF=gi:13435351 /UG=Hs.69745 ferredoxin reducta
218587_s_at	x 010 protein	MDS010	9.7	A	142.2	P	14.6598	3.87379	7.5	A	75.7	A	10.0933	3.33533	32.6	A	117.9	A	3.61656	1.85462	gb:NM_020231.1 /DEF=Homo sapiens x 010 protein (MDS010), mRNA. /FEA=mRNA /GEN=MDS010 /PROD=x 010 protein /DB_XREF=gi:9910427 /UG=Hs.159397 x 010 protein /FL=gb:AF168711.1 gb:NM_020231.1
216836_s_at	v-erb-b2 erythroblastic leukemia viral oncogene homolog 2, neuro/glioblastoma derived oncogene homolog (avian)	ERBB2	19	A	265.4	P	13.9684	3.8041	60.2	A	59	A	0.980066	-0.0290485	20.1	A	41.1	A	2.04478	1.03194	Consensus includes gb:X03363.1 /DEF=Human c-erb-B-2 mRNA. /FEA=mRNA /DB_XREF=gi:31197 /UG=Hs.323910 v-erb-b2 avian erythroblastic leukemia viral oncogene homolog 2 (neuroglioblastoma derived oncogene homolog)
203815_at	glutathione S-transferase theta 1	GSTT1	9.5	A	129.9	P	13.6737	3.77333	8.4	A	6.7	A	0.797619	-0.326228	47.2	A	23.4	A	0.495763	-1.01228	gb:NM_000853.1 /DEF=Homo sapiens glutathione S-transferase theta 1 (GSTT1), mRNA. /FEA=mRNA /GEN=GSTT1 /PROD=glutathione S-transferase theta 1 /DB_XREF=gi:4504184 /UG=Hs.77490 glutathione S-transferase theta 1 /FL=gb:NM_000853.1
205066_s_at	ectonucleotide pyrophosphatase/phosphodiesterase 1	ENPP1	19.1	A	261	P	13.6649	3.77241	58.7	A	27.1	A	0.46167	-1.11507	24.1	A	1	A	0.0414938	-4.59096	gb:NM_006208.1 /DEF=Homo sapiens ectonucleotide pyrophosphatasephosphodiesterase 1 (ENPP1), mRNA. /FEA=mRNA /GEN=ENPP1 /PROD=ectonucleotide pyrophosphatasephosphodiesterase1 /DB_XREF=gi:13324676 /UG=Hs.11951 ectonucleotide pyrophosphatasephosphodiesteras
218686_s_at	likely ortholog of mouse epidermal growth factor receptor, related sequence	EGFR-RS	20.3	A	274.2	P	13.5074	3.75568	26.1	A	127.9	A	4.90038	2.29289	89.8	A	85.4	A	0.951002	-0.0724794	gb:NM_022450.1 /DEF=Homo sapiens hypothetical protein FLJ22357 similar to epidermal growth factor receptor-related protein (FLJ22357), mRNA. /FEA=mRNA /GEN=FLJ22357 /PROD=hypothetical protein FLJ22357 similar toepidermal growth factor receptor-related p
205242_at	chemokine (C-X-C motif) ligand 13 (B-cell chemoattractant)	CXCL13	10.7	A	138	P	12.8972	3.68899	9.9	A	1.2	A	0.121212	-3.04439	6.1	A	3.7	A	0.606557	-0.721284	gb:NM_006419.1 /DEF=Homo sapiens small inducible cytokine B subfamily (Cys-X-Cys motif), member 13 (B-cell chemoattractant) (SCYB13), mRNA. /FEA=mRNA /GEN=SCYB13 /PROD=small inducible cytokine B subfamily (Cys-X-Cysmotif), member 13 (B-cell chemoattracta
204306_s_at	CD151 antigen	CD151	21.3	A	239.7	P	11.2535	3.4923	23.5	A	102.3	A	4.35319	2.12207	19.5	A	9.4	A	0.482051	-1.05274	gb:NM_004357.1 /DEF=Homo sapiens CD151 antigen (CD151), mRNA. /FEA=mRNA /GEN=CD151 /PROD=CD151 antigen /DB_XREF=gi:4757941 /UG=Hs.75564 CD151 antigen /FL=gb:BC001374.1 gb:D29963.1 gb:NM_004357.1 gb:U14650.1
210096_at	cytochrome P450, family 4, subfamily B, polypeptide 1	CYP4B1	58.2	A	643.8	P	11.0619	3.46752	6.5	A	5.4	A	0.830769	-0.26748	19.9	A	16.1	A	0.809045	-0.305708	gb:J02871.1 /DEF=Human lung cytochrome P450 (IV subfamily) BI protein, complete cds. /FEA=mRNA /DB_XREF=gi:180968 /UG=Hs.687 cytochrome P450, subfamily IVB, polypeptide 1 /FL=gb:NM_000779.2 gb:J02871.1
205225_at	estrogen receptor 1	ESR1	92.8	A	878.8	P	9.46983	3.24334	18.3	A	27.2	A	1.48634	0.571763	70.3	A	20.5	A	0.291607	-1.7779	gb:NM_000125.1 /DEF=Homo sapiens estrogen receptor 1 (ESR1), mRNA. /FEA=mRNA /GEN=ESR1 /PROD=estrogen receptor 1 /DB_XREF=gi:4503602 /UG=Hs.1657 estrogen receptor 1 /FL=gb:NM_000125.1
209854_s_at	kallikrein 2, prostatic	KLK2	4.9	A	8.9	A	1.81633	0.861024	9.7	A	3323.2	P	342.598	8.42037	25.8	A	3.3	A	0.127907	-2.96683	Consensus includes gb:AA595465 /FEA=EST /DB_XREF=gi:2410815 /DB_XREF=est:no34e09.s1 /CLONE=IMAGE:1102600 /UG=Hs.181350 kallikrein 2, prostatic /FL=gb:AF188745.1 gb:AF188747.1
204582_s_at	kallikrein 3, (prostate specific antigen)	KLK3	31.7	A	134.9	A	4.25552	2.08934	15.3	A	5224.3	P	341.458	8.41556	19.2	A	3.7	A	0.192708	-2.37551	gb:NM_001648.1 /DEF=Homo sapiens kallikrein 3, (prostate specific antigen) (KLK3), mRNA. /FEA=mRNA /GEN=KLK3 /PROD=kallikrein 3, (prostate specific antigen) /DB_XREF=gi:4502172 /UG=Hs.171995 kallikrein 3, (prostate specific antigen) /FL=gb:BC005307.1 gb:
217771_at	golgi phosphoprotein 2	GOLPH2	8.4	A	56	A	6.66667	2.73697	4.6	A	462.4	P	100.522	6.65136	5.7	A	38.7	A	6.78947	2.7633	gb:NM_016548.1 /DEF=Homo sapiens golgi membrane protein GP73 (LOC51280), mRNA. /FEA=mRNA /GEN=LOC51280 /PROD=golgi membrane protein GP73 /DB_XREF=gi:7706084 /UG=Hs.182793 golgi membrane protein GP73 /FL=gb:BC001740.1 gb:AF236056.1 gb:NM_016548.1
210297_s_at	microseminoprotein, beta-	MSMB	36.4	A	2.6	A	0.0714286	-3.80735	7.3	A	694	P	95.0685	6.5709	3.4	A	14.1	A	4.14706	2.05209	gb:U22178.1 /DEF=Human prostatic secretory protein 57 mRNA, complete cds. /FEA=mRNA /PROD=PSP57 /DB_XREF=gi:885984 /UG=Hs.183752 microseminoprotein, beta- /FL=gb:U22178.1
207030_s_at	cysteine and glycine-rich protein 2	CSRP2	18	A	13.7	A	0.761111	-0.393821	5.3	A	454.9	P	85.8302	6.42341	24.1	A	33.3	A	1.38174	0.466489	gb:NM_001321.1 /DEF=Homo sapiens cysteine and glycine-rich protein 2 (CSRP2), mRNA. /FEA=mRNA /GEN=CSRP2 /PROD=cysteine and glycine-rich protein 2 /DB_XREF=gi:4503100 /UG=Hs.10526 cysteine and glycine-rich protein 2 /FL=gb:BC000992.2 gb:U57646.1 gb:NM_001
206001_at	neuropeptide Y	NPY	36.3	A	47.7	A	1.31405	0.39402	89.9	A	6758.4	P	75.1769	6.23222	31.2	A	4.8	A	0.153846	-2.70044	gb:NM_000905.1 /DEF=Homo sapiens neuropeptide Y (NPY), mRNA. /FEA=mRNA /GEN=NPY /PROD=neuropeptide Y /DB_XREF=gi:4505448 /UG=Hs.1832 neuropeptide Y /FL=gb:K01911.1 gb:M15789.1 gb:NM_000905.1
205924_at	RAB3B, member RAS oncogene family	RAB3B	8.9	A	5	A	0.561798	-0.831877	4.2	A	201.9	P	48.0714	5.58711	6.7	A	4.6	A	0.686567	-0.542527	gb:BC005035.1 /DEF=Homo sapiens, RAB3B, member RAS oncogene family, clone MGC:12720, mRNA, complete cds. /FEA=mRNA /PROD=RAB3B, member RAS oncogene family /DB_XREF=gi:13477154 /UG=Hs.123072 RAB3B, member RAS oncogene family /FL=gb:BC005035.1 gb:NM_002867
203180_at	aldehyde dehydrogenase 1 family, member A3	ALDH1A3	9.9	A	6.5	A	0.656566	-0.606989	7.3	A	251.4	P	34.4384	5.10594	5.3	A	2.3	A	0.433962	-1.20436	gb:NM_000693.1 /DEF=Homo sapiens aldehyde dehydrogenase 1 family, member A3 (ALDH1A3), mRNA. /FEA=mRNA /GEN=ALDH1A3 /PROD=aldehyde dehydrogenase 1A3 /DB_XREF=gi:4502040 /UG=Hs.75746 aldehyde dehydrogenase 1 family, member A3 /FL=gb:NM_000693.1 gb:U07919.
202363_at	sparc/osteonectin, cwcv and kazal-like domains proteoglycan (testican)	SPOCK	56.1	A	5.5	A	0.0980392	-3.3505	25.3	A	652.3	P	25.7826	4.68833	6.7	A	31.5	A	4.70149	2.23312	gb:AF231124.1 /DEF=Homo sapiens testican-1 mRNA, complete cds. /FEA=mRNA /PROD=testican-1 /DB_XREF=gi:7248844 /UG=Hs.93029 sparcosteonectin, cwcv and kazal-like domains proteoglycan (testican) /FL=gb:NM_004598.1 gb:AF231124.1
205311_at	dopa decarboxylase (aromatic L-amino acid decarboxylase)	DDC	46.6	A	2.5	A	0.0536481	-4.22033	7.8	A	199.8	P	25.6154	4.67894	39.1	A	68.7	A	1.75703	0.813141	gb:NM_000790.1 /DEF=Homo sapiens dopa decarboxylase (aromatic L-amino acid decarboxylase) (DDC), mRNA. /FEA=mRNA /GEN=DDC /PROD=dopa decarboxylase (aromatic L-amino aciddecarboxylase) /DB_XREF=gi:4503280 /UG=Hs.150403 dopa decarboxylase (aromatic L-amino
210576_at	cytochrome P450, family 4, subfamily F, polypeptide 8	CYP4F8	5.9	A	16	A	2.71186	1.43929	8.8	A	205.1	P	23.3068	4.54268	5.3	A	1.6	A	0.301887	-1.72792	gb:AF133298.1 /DEF=Homo sapiens cytochrome P450 (CYP4F8) mRNA, complete cds. /FEA=mRNA /GEN=CYP4F8 /PROD=cytochrome P450 /DB_XREF=gi:5733408 /UG=Hs.268554 cytochrome P450, subfamily IVF, polypeptide 8 /FL=gb:NM_007253.2 gb:AF133298.1
204934_s_at	hepsin (transmembrane protease, serine 1)	HPN	42.8	A	47.7	A	1.11449	0.156378	5	A	111.1	P	22.22	4.47379	104.3	A	3.2	A	0.0306807	-5.02652	gb:NM_002151.1 /DEF=Homo sapiens hepsin (transmembrane protease, serine 1) (HPN), mRNA. /FEA=mRNA /GEN=HPN /PROD=hepsin (transmembrane protease, serine 1) /DB_XREF=gi:4504480 /UG=Hs.823 hepsin (transmembrane protease, serine 1) /FL=gb:M18930.1 gb:NM_00215
206167_s_at	Rho GTPase activating protein 6	ARHGAP6	70.3	A	7.9	A	0.112376	-3.1536	12.8	A	248	P	19.375	4.27612	48.6	A	56.6	A	1.16461	0.219846	gb:NM_001174.2 /DEF=Homo sapiens Rho GTPase activating protein 6 (ARHGAP6), transcript variant 2, mRNA. /FEA=mRNA /GEN=ARHGAP6 /PROD=Rho GTPase activating protein 6 isoform 2 /DB_XREF=gi:7382476 /UG=Hs.250830 Rho GTPase activating protein 6 /FL=gb:AF0222
213793_s_at	homer homolog 1 (Drosophila)	HOMER1	24.6	A	4	A	0.162602	-2.62059	4.6	A	83.8	P	18.2174	4.18724	1.4	A	29.4	A	21	4.39232	Consensus includes gb:BE550452 /FEA=EST /DB_XREF=gi:9792144 /DB_XREF=est:7a25f02.x1 /CLONE=IMAGE:3219771 /UG=Hs.9192 Homer, neuronal immediate early gene, 1B
210163_at	chemokine (C-X-C motif) ligand 11	CXCL11	24.1	A	6.1	A	0.253112	-1.98215	27.5	A	332.3	P	12.0836	3.59498	24	A	1.3	A	0.0541667	-4.20645	gb:AF030514.1 /DEF=Homo sapiens interferon stimulated T-cell alpha chemoattractant precursor, mRNA, complete cds. /FEA=mRNA /PROD=interferon stimulated T-cell alphachemoattractant precursor /DB_XREF=gi:3219692 /UG=Hs.103982 small inducible cytokine subfa
205968_at	potassium voltage-gated channel, delayed-rectifier, subfamily S, member 3	KCNS3	15.8	A	96	A	6.07595	2.60311	12.5	A	147.2	P	11.776	3.55778	14.2	A	27.9	A	1.96479	0.974374	gb:NM_002252.1 /DEF=Homo sapiens potassium voltage-gated channel, delayed-rectifier, subfamily S, member 3 (KCNS3), mRNA. /FEA=mRNA /GEN=KCNS3 /PROD=potassium voltage-gated channel,delayed-rectifier, subfamily S, member 3 /DB_XREF=gi:4504862 /UG=Hs.47584
211110_s_at	androgen receptor (dihydrotestosterone receptor; testicular feminization; spinal and bulbar muscular atrophy; Kennedy disease)	AR	46.1	A	82.2	A	1.78308	0.834372	27.6	A	292.4	P	10.5942	3.4052	60.3	A	29.6	A	0.490879	-1.02656	gb:AF162704.1 /DEF=Homo sapiens cell-line MDA-MB-453 androgen receptor mRNA, complete cds. /FEA=mRNA /PROD=androgen receptor /DB_XREF=gi:5639998 /UG=Hs.99915 androgen receptor (dihydrotestosterone receptor; testicular feminization; spinal and bulbar musc
205051_s_at	v-kit Hardy-Zuckerman 4 feline sarcoma viral oncogene homolog	KIT	13.1	A	13.7	A	1.0458	0.0646091	7.9	A	80.3	P	10.1646	3.34548	15.6	A	16.3	A	1.04487	0.0633259	gb:NM_000222.1 /DEF=Homo sapiens v-kit Hardy-Zuckerman 4 feline sarcoma viral oncogene homolog (KIT), mRNA. /FEA=mRNA /GEN=KIT /PROD=v-kit Hardy-Zuckerman 4 feline sarcoma viraloncogene homolog precursor /DB_XREF=gi:4557694 /UG=Hs.81665 v-kit Hardy-Zucke
33767_at	neurofilament, heavy polypeptide 200kDa	NEFH	28.3	A	2	A	0.0706714	-3.82273	10.1	A	99.6	P	9.86139	3.30179	36.3	A	21.1	A	0.581267	-0.782727	Cluster Incl. X15306:H.sapiens NF-H gene, exon 1 (and joined CDS) /cds=(0,3062) /gb=X15306 /gi=35028 /ug=Hs.198760 /len=3750
202237_at	nicotinamide N-methyltransferase	NNMT	12.5	A	6	A	0.48	-1.05889	14	A	137.7	P	9.83571	3.29803	17.4	A	2.9	A	0.166667	-2.58496	gb:NM_006169.1 /DEF=Homo sapiens nicotinamide N-methyltransferase (NNMT), mRNA. /FEA=mRNA /GEN=NNMT /PROD=nicotinamide N-methyltransferase /DB_XREF=gi:5453789 /UG=Hs.76669 nicotinamide N-methyltransferase /FL=gb:BC000234.1 gb:U08021.1 gb:NM_006169.1
205509_at	carboxypeptidase B1 (tissue)	CPB1	30.7	A	25.9	A	0.843648	-0.245287	16.2	A	147.3	P	9.09259	3.18469	64.8	A	30.6	A	0.472222	-1.08246	gb:NM_001871.1 /DEF=Homo sapiens carboxypeptidase B1 (tissue) (CPB1), mRNA. /FEA=mRNA /GEN=CPB1 /PROD=pancreatic carboxypeptidase B1 precursor /DB_XREF=gi:4503002 /UG=Hs.180884 carboxypeptidase B1 (tissue) /FL=gb:NM_001871.1 gb:M81057.1
202133_at	transcriptional co-activator with PDZ-binding motif (TAZ)	TAZ	2.8	A	2.2	A	0.785714	-0.347923	9	A	75.3	P	8.36667	3.06465	4.2	A	1	A	0.238095	-2.07039	Consensus includes gb:BF674349 /FEA=EST /DB_XREF=gi:11948244 /DB_XREF=est:602137094F1 /CLONE=IMAGE:4273679 /UG=Hs.24341 transcriptional co-activator with PDZ-binding motif (TAZ) /FL=gb:NM_015472.1
200947_s_at	glutamate dehydrogenase 1	GLUD1	11.9	A	118.2	A	9.93277	3.3122	17.6	A	142.2	P	8.07955	3.01427	25.3	A	81.4	A	3.21739	1.68589	gb:NM_005271.1 /DEF=Homo sapiens glutamate dehydrogenase 1 (GLUD1), mRNA. /FEA=mRNA /GEN=GLUD1 /PROD=glutamate dehydrogenase 1 /DB_XREF=gi:4885280 /UG=Hs.77508 glutamate dehydrogenase 1 /FL=gb:J03248.1 gb:M37154.1 gb:M20867.1 gb:NM_005271.1
203557_s_at	6-pyruvoyl-tetrahydropterin synthase/dimerization cofactor of hepatocyte nuclear factor 1 alpha (TCF1)	PCBD	14	A	102.8	A	7.34286	2.87634	42.1	A	320.4	P	7.61045	2.92798	56.4	A	15.7	A	0.278369	-1.84493	gb:NM_000281.1 /DEF=Homo sapiens 6-pyruvoyl-tetrahydropterin synthasedimerization cofactor of hepatocyte nuclear factor 1 alpha (TCF1) (PCBD), mRNA. /FEA=mRNA /GEN=PCBD /PROD=pterin-4 alpha-carbinolamine dehydrataseprecursor /DB_XREF=gi:4557830 /UG=Hs.31
201976_s_at	myosin X	MYO10	20.9	A	11	A	0.526316	-0.925999	14.3	A	107.8	P	7.53846	2.91427	50.3	A	58.7	A	1.167	0.222802	gb:NM_012334.1 /DEF=Homo sapiens myosin X (MYO10), mRNA. /FEA=mRNA /GEN=MYO10 /PROD=myosin X /DB_XREF=gi:11037056 /UG=Hs.61638 myosin X /FL=gb:NM_012334.1 gb:AF234532.1 gb:AF247457.2
205819_at	macrophage receptor with collagenous structure	MARCO	25.4	A	7.5	A	0.295276	-1.75987	22.3	A	28.3	A	1.26906	0.343758	17.8	A	558.5	P	31.3764	4.97161	gb:NM_006770.1 /DEF=Homo sapiens macrophage receptor with collagenous structure (MARCO), mRNA. /FEA=mRNA /GEN=MARCO /PROD=macrophage receptor with collagenous structure /DB_XREF=gi:5803079 /UG=Hs.67726 macrophage receptor with collagenous structure /FL=g
219508_at	glucosaminyl (N-acetyl) transferase 3, mucin type	GCNT3	7.1	A	51.1	A	7.19718	2.84743	35.2	A	6	A	0.170455	-2.55254	5.9	A	127.3	P	21.5763	4.43137	gb:NM_004751.1 /DEF=Homo sapiens glucosaminyl (N-acetyl) transferase 3, mucin type (GCNT3), mRNA. /FEA=mRNA /GEN=GCNT3 /PROD=glucosaminyl (N-acetyl) transferase 3, mucintype /DB_XREF=gi:4758421 /UG=Hs.194710 glucosaminyl (N-acetyl) transferase 3, mucin t
210220_at	frizzled homolog 2 (Drosophila)	FZD2	35	A	42	A	1.2	0.263034	43.4	A	4.8	A	0.110599	-3.17659	4.7	A	73.4	P	15.617	3.96505	gb:L37882.1 /DEF=Human frizzled gene product mRNA, complete cds. /FEA=mRNA /GEN=frizzled /DB_XREF=gi:736678 /UG=Hs.81217 frizzled (Drosophila) homolog 2 /FL=gb:AB017364.1 gb:NM_001466.2 gb:L37882.1
205892_s_at	fatty acid binding protein 1, liver	FABP1	3	A	3.9	A	1.3	0.378512	6.9	A	11.1	A	1.6087	0.685891	4.4	A	65.3	P	14.8409	3.89151	gb:NM_001443.1 /DEF=Homo sapiens fatty acid binding protein 1, liver (FABP1), mRNA. /FEA=mRNA /GEN=FABP1 /PROD=fatty acid binding protein 1, liver /DB_XREF=gi:4557576 /UG=Hs.5241 fatty acid binding protein 1, liver /FL=gb:M10050.1 gb:M10617.1 gb:NM_001443
202949_s_at	four and a half LIM domains 2	FHL2	31.1	A	9.4	A	0.302251	-1.72618	58.7	A	169.8	A	2.89267	1.5324	31.7	A	451	P	14.2271	3.83057	gb:NM_001450.1 /DEF=Homo sapiens four and a half LIM domains 2 (FHL2), mRNA. /FEA=mRNA /GEN=FHL2 /PROD=four and a half LIM domains 2 /DB_XREF=gi:4503722 /UG=Hs.8302 four and a half LIM domains 2 /FL=gb:U29332.1 gb:NM_001450.1
204259_at	matrix metalloproteinase 7 (matrilysin, uterine)	MMP7	70.1	A	36.1	A	0.514979	-0.957416	36.9	A	65.3	A	1.76965	0.823462	28.9	A	402.3	P	13.9204	3.79913	gb:NM_002423.2 /DEF=Homo sapiens matrix metalloproteinase 7 (matrilysin, uterine) (MMP7), mRNA. /FEA=mRNA /GEN=MMP7 /PROD=matrix metalloproteinase 7 preproprotein /DB_XREF=gi:13027804 /UG=Hs.2256 matrix metalloproteinase 7 (matrilysin, uterine) /FL=gb:NM
206756_at	carbohydrate (N-acetylglucosamine 6-O) sulfotransferase 7	CHST7	98.5	A	2.3	A	0.0233503	-5.42042	11.6	A	4.8	A	0.413793	-1.27302	9.8	A	133	P	13.5714	3.7625	gb:NM_019886.1 /DEF=Homo sapiens carbohydrate (N-acetylglucosamine 6-O) sulfotransferase 7 (CHST7), mRNA. /FEA=mRNA /GEN=CHST7 /PROD=carbohydrate (N-acetylglucosamine 6-O)sulfotransferase 7 /DB_XREF=gi:9845239 /UG=Hs.138155 carbohydrate (N-acetylglucosam
202003_s_at	acetyl-Coenzyme A acyltransferase 2 (mitochondrial 3-oxoacyl-Coenzyme A thiolase)	ACAA2	93.7	A	177.8	A	1.89755	0.924134	87.5	A	88.8	A	1.01486	0.0212767	30.3	A	377.4	P	12.4554	3.6387	gb:NM_006111.1 /DEF=Homo sapiens acetyl-Coenzyme A acyltransferase 2 (mitochondrial 3-oxoacyl-Coenzyme A thiolase) (ACAA2), nuclear gene encoding mitochondrial protein, mRNA. /FEA=mRNA /GEN=ACAA2 /PROD=acetyl-Coenzyme A acyltransferase 2(mitochondrial 3-
218755_at	kinesin family member 20A	KIF20A	7.4	A	93.2	A	12.5946	3.65473	9.1	A	53.1	A	5.83516	2.54477	7.8	A	81.8	P	10.4872	3.39055	gb:NM_005733.1 /DEF=Homo sapiens RAB6 interacting, kinesin-like (rabkinesin6) (RAB6KIFL), mRNA. /FEA=mRNA /GEN=RAB6KIFL /PROD=RAB6 interacting, kinesin-like (rabkinesin6) /DB_XREF=gi:5032012 /UG=Hs.73625 RAB6 interacting, kinesin-like (rabkinesin6) /FL=g
202545_at	protein kinase C, delta	PRKCD	80.3	A	40.7	A	0.506849	-0.980371	15.2	A	11.7	A	0.769737	-0.377563	22.6	A	235.1	P	10.4027	3.37888	gb:NM_006254.1 /DEF=Homo sapiens protein kinase C, delta (PRKCD), mRNA. /FEA=mRNA /GEN=PRKCD /PROD=protein kinase C, delta /DB_XREF=gi:5453969 /UG=Hs.155342 protein kinase C, delta /FL=gb:L07860.1 gb:L07861.1 gb:D10495.1 gb:NM_006254.1
205506_at	villin 1	VIL1	32.3	A	4.2	A	0.130031	-2.94307	40.3	A	5.4	A	0.133995	-2.89975	7.9	A	80.1	P	10.1392	3.34188	gb:NM_007127.1 /DEF=Homo sapiens villin 1 (VIL1), mRNA. /FEA=mRNA /GEN=VIL1 /PROD=villin 1 /DB_XREF=gi:6005943 /UG=Hs.166068 villin 1 /FL=gb:NM_007127.1
218555_at	anaphase-promoting complex subunit 2	ANAPC2	117.9	A	113	A	0.958439	-0.0612409	28.6	A	64.8	A	2.26573	1.17998	9.2	A	87.4	P	9.5	3.24793	gb:NM_013366.2 /DEF=Homo sapiens anaphase-promoting complex subunit 2 (APC2), mRNA. /FEA=mRNA /GEN=APC2 /PROD=anaphase-promoting complex 2 /DB_XREF=gi:7549800 /UG=Hs.23076 anaphase-promoting complex subunit 2 /FL=gb:AF191337.1 gb:NM_013366.2
219278_at	mitogen-activated protein kinase kinase kinase 6	MAP3K6	5.1	A	17	A	3.33333	1.73697	37.5	A	57.5	A	1.53333	0.616671	9.5	A	86.7	P	9.12632	3.19003	gb:NM_004672.1 /DEF=Homo sapiens mitogen-activated protein kinase kinase kinase 6 (MAP3K6), mRNA. /FEA=mRNA /GEN=MAP3K6 /PROD=mitogen-activated protein kinase kinase kinase6 /DB_XREF=gi:4758701 /UG=Hs.194694 mitogen-activated protein kinase kinase kinase
206130_s_at	asialoglycoprotein receptor 2	ASGR2	39	A	5.6	A	0.14359	-2.79998	43.7	A	17.3	A	0.395881	-1.33686	27.9	A	249.4	P	8.93907	3.16012	gb:NM_001181.1 /DEF=Homo sapiens asialoglycoprotein receptor 2 (ASGR2), mRNA. /FEA=mRNA /GEN=ASGR2 /PROD=asialoglycoprotein receptor 2 /DB_XREF=gi:4502252 /UG=Hs.1259 asialoglycoprotein receptor 2 /FL=gb:M11025.1 gb:NM_001181.1
220974_x_at	similar to rat tricarboxylate carrier-like protein	BA108L7.2	42.1	A	61.3	A	1.45606	0.542067	19.7	A	4.7	A	0.238579	-2.06746	19	A	168.4	P	8.86316	3.14782	gb:NM_030971.1 /DEF=Homo sapiens similar to rat tricarboxylate carrier-like protein (BA108L7.2), mRNA. /FEA=mRNA /GEN=BA108L7.2 /PROD=similar to rat tricarboxylate carrier-likeprotein /DB_XREF=gi:13569945 /FL=gb:NM_030971.1
205997_at	a disintegrin and metalloproteinase domain 28	ADAM28	3.9	A	2	A	0.512821	-0.963474	16.6	A	30.3	A	1.8253	0.868135	14	A	123.4	P	8.81429	3.13984	gb:NM_021778.1 /DEF=Homo sapiens a disintegrin and metalloproteinase domain 28 (ADAM28), transcript variant 2, mRNA. /FEA=mRNA /GEN=ADAM28 /PROD=a disintegrin and metalloproteinase domain 28,isoform 2 preproprotein /DB_XREF=gi:11496995 /UG=Hs.174030 a di
219452_at	putative dipeptidase	LOC64174	161.6	A	6.1	A	0.0377475	-4.72747	105.2	A	12.1	A	0.115019	-3.12006	54.5	A	475.5	P	8.72477	3.12512	gb:NM_022355.1 /DEF=Homo sapiens putative dipeptidase (LOC64174), mRNA. /FEA=mRNA /GEN=LOC64174 /PROD=putative dipeptidase /DB_XREF=gi:11641268 /UG=Hs.115537 putative dipeptidase /FL=gb:NM_022355.1
205025_at	GLI-Kruppel family member HKR3	HKR3	6.1	A	18.4	A	3.01639	1.59282	7.2	A	6.3	A	0.875	-0.192645	7.5	A	65.2	P	8.69333	3.11991	gb:NM_005341.1 /DEF=Homo sapiens GLI-Kruppel family member HKR3 (HKR3), mRNA. /FEA=mRNA /GEN=HKR3 /PROD=GLI-Kruppel family member HKR3 /DB_XREF=gi:4885418 /UG=Hs.2364 GLI-Kruppel family member HKR3 /FL=gb:L16896.1 gb:NM_005341.1
206074_s_at	high mobility group AT-hook 1	HMGA1	47.1	A	89.3	A	1.89597	0.922933	12	A	42.8	A	3.56667	1.83458	22.3	A	193.3	P	8.66816	3.11573	gb:NM_002131.1 /DEF=Homo sapiens high-mobility group (nonhistone chromosomal) protein isoforms I and Y (HMGIY), mRNA. /FEA=mRNA /GEN=HMGIY /PROD=high-mobility group (nonhistone chromosomal)protein isoforms I and Y /DB_XREF=gi:4504432 /UG=Hs.139800 high-m
201884_at	carcinoembryonic antigen-related cell adhesion molecule 5	CEACAM5	78.1	P	222.6	P	2.85019	1.51106	71.7	A	24.2	A	0.337517	-1.56697	73.7	A	552.8	P	7.50068	2.90702	gb:NM_004363.1 /DEF=Homo sapiens carcinoembryonic antigen-related cell adhesion molecule 5 (CEACAM5), mRNA. /FEA=mRNA /GEN=CEACAM5 /PROD=carcinoembryonic antigen-related cell adhesionmolecule 5 /DB_XREF=gi:11386170 /UG=Hs.220529 carcinoembryonic antigen-
201650_at	keratin 19	KRT19	2	A	8045.2	P	4022.6	11.9739	2.1	A	628	P	299.048	8.22423	3.3	A	118.5	P	35.9091	5.16628	gb:NM_002276.1 /DEF=Homo sapiens keratin 19 (KRT19), mRNA. /FEA=mRNA /GEN=KRT19 /PROD=keratin 19 /DB_XREF=gi:4504916 /UG=Hs.182265 keratin 19 /FL=gb:BC002539.1 gb:NM_002276.1
202286_s_at	tumor-associated calcium signal transducer 2	TACSTD2	12	A	3502	P	291.833	8.189	30.6	A	1145.9	P	37.4477	5.22681	11.5	A	134.6	P	11.7043	3.54897	Consensus includes gb:J04152 /DEF=Human gastrointestinal tumor-associated antigen GA733-1 protein gene, complete cds, clone 05516 /FEA=mRNA /DB_XREF=gi:182893 /UG=Hs.23582 tumor-associated calcium signal transducer 2 /FL=gb:NM_002353.1
201839_s_at	tumor-associated calcium signal transducer 1	TACSTD1	2.5	A	728.6	P	291.44	8.18706	16.2	A	634.4	P	39.1605	5.29133	4.9	A	680.2	P	138.816	7.11703	gb:NM_002354.1 /DEF=Homo sapiens tumor-associated calcium signal transducer 1 (TACSTD1), mRNA. /FEA=mRNA /GEN=TACSTD1 /PROD=tumor-associated calcium signal transducer 1precursor /DB_XREF=gi:4505058 /UG=Hs.692 tumor-associated calcium signal transducer 1
203038_at	protein tyrosine phosphatase, receptor type, K	PTPRK	3.6	A	918	P	255	7.99435	7.5	A	190.5	P	25.4	4.66676	34.7	A	103.2	P	2.97406	1.57244	gb:NM_002844.1 /DEF=Homo sapiens protein tyrosine phosphatase, receptor type, K (PTPRK), mRNA. /FEA=mRNA /GEN=PTPRK /PROD=protein tyrosine phosphatase, receptor type, K /DB_XREF=gi:4506316 /UG=Hs.79005 protein tyrosine phosphatase, receptor type, K /FL=g
209173_at	anterior gradient 2 homolog (Xenepus laevis)	AGR2	10.5	A	2015.3	P	191.933	7.58446	7.6	A	240.4	A	31.6316	4.98329	7.5	A	340.2	P	45.36	5.50335	gb:AF088867.1 /DEF=Homo sapiens putative secreted protein XAG mRNA, complete cds. /FEA=mRNA /PROD=putative secreted protein XAG /DB_XREF=gi:6652811 /UG=Hs.91011 anterior gradient 2 (Xenepus laevis) homolog /FL=gb:AF007791.1 gb:AF038451.1 gb:NM_006408.1 gb
204623_at	trefoil factor 3 (intestinal)	TFF3	48.9	A	4171.3	P	85.3027	6.41452	24.2	A	174.8	P	7.22314	2.85263	28.8	A	128.1	P	4.44792	2.15313	gb:NM_003226.1 /DEF=Homo sapiens trefoil factor 3 (intestinal) (TFF3), mRNA. /FEA=mRNA /GEN=TFF3 /PROD=trefoil factor 3 (intestinal) /DB_XREF=gi:4507452 /UG=Hs.82961 trefoil factor 3 (intestinal) /FL=gb:L08044.1 gb:L15203.1 gb:NM_003226.1
205009_at	trefoil factor 1 (breast cancer, estrogen-inducible sequence expressed in)	TFF1	106.7	A	7730.4	P	72.4499	6.17891	63.5	A	1522.4	P	23.9748	4.58345	79.5	A	163.8	P	2.06038	1.04291	gb:NM_003225.1 /DEF=Homo sapiens trefoil factor 1 (breast cancer, estrogen-inducible sequence expressed in) (TFF1), mRNA. /FEA=mRNA /GEN=TFF1 /PROD=trefoil factor 1 (breast cancer,estrogen-inducible sequence expressed in) /DB_XREF=gi:4507450 /UG=Hs.1406
201596_x_at	keratin 18	KRT18	127.4	A	8040.7	P	63.1138	5.97988	52.6	A	7112.1	P	135.211	7.07907	66	A	2742.3	P	41.55	5.37678	gb:NM_000224.1 /DEF=Homo sapiens keratin 18 (KRT18), mRNA. /FEA=mRNA /GEN=KRT18 /PROD=keratin 18 /DB_XREF=gi:4557887 /UG=Hs.65114 keratin 18 /FL=gb:BC000698.1 gb:BC000180.2 gb:BC004253.1 gb:M26326.1 gb:NM_000224.1
202768_at	FBJ murine osteosarcoma viral oncogene homolog B	FOSB	15.2	A	865.6	P	56.9474	5.83156	20.9	A	144.2	P	6.89952	2.7865	10.6	A	140.1	P	13.217	3.72432	gb:NM_006732.1 /DEF=Homo sapiens FBJ murine osteosarcoma viral oncogene homolog B (FOSB), mRNA. /FEA=mRNA /GEN=FOSB /PROD=FBJ murine osteosarcoma viral oncogene homologB /DB_XREF=gi:5803016 /UG=Hs.75678 FBJ murine osteosarcoma viral oncogene homolog B /F
202942_at	electron-transfer-flavoprotein, beta polypeptide	ETFB	27.4	A	837.1	P	30.5511	4.93315	70.3	A	809.2	P	11.5107	3.5249	81.4	A	357.8	P	4.39558	2.13605	gb:NM_001985.1 /DEF=Homo sapiens electron-transfer-flavoprotein, beta polypeptide (ETFB), mRNA. /FEA=mRNA /GEN=ETFB /PROD=electron-transfer-flavoprotein, betapolypeptide /DB_XREF=gi:4503608 /UG=Hs.74047 electron-transfer-flavoprotein, beta polypeptide /F
201892_s_at	IMP (inosine monophosphate) dehydrogenase 2	IMPDH2	109.4	A	1295.4	P	11.841	3.56571	30.3	A	5564.7	P	183.653	7.52084	106	A	624	P	5.88679	2.55748	gb:NM_000884.1 /DEF=Homo sapiens IMP (inosine monophosphate) dehydrogenase 2 (IMPDH2), mRNA. /FEA=mRNA /GEN=IMPDH2 /PROD=IMP (inosine monophosphate) dehydrogenase 2 /DB_XREF=gi:4504688 /UG=Hs.75432 IMP (inosine monophosphate) dehydrogenase 2 /FL=gb:J0420
217867_x_at	beta-site APP-cleaving enzyme 2	BACE2	99.9	A	1045.2	P	10.4625	3.38715	103	A	897.9	P	8.71748	3.12391	48.7	A	117.7	P	2.41684	1.27312	gb:NM_012105.1 /DEF=Homo sapiens beta-site APP-cleaving enzyme 2 (BACE2), mRNA. /FEA=mRNA /GEN=BACE2 /PROD=beta-site APP-cleaving enzyme 2 /DB_XREF=gi:6912263 /UG=Hs.271411 beta-site APP-cleaving enzyme 2 /FL=gb:AF117892.1 gb:AF050171.1 gb:AF200192.1 gb:A
218436_at	endoplasmic reticulum chaperone SIL1, homolog of yeast	SIL1	21.6	A	220.7	P	10.2176	3.35298	12	A	126.7	P	10.5583	3.40031	12.8	A	146	P	11.4062	3.51175	gb:NM_022464.1 /DEF=Homo sapiens endoplasmic reticulum chaperone SIL1, homolog of yeast (SIL1), mRNA. /FEA=mRNA /GEN=SIL1 /PROD=endoplasmic reticulum chaperone SIL1, homolog ofyeast /DB_XREF=gi:11968008 /UG=Hs.297875 endoplasmic reticulum chaperone SIL1,
202598_at	S100 calcium binding protein A13	S100A13	78.8	A	709.4	P	9.00254	3.17033	39.5	A	243.6	P	6.16709	2.62459	24.9	A	87.3	P	3.50602	1.80984	gb:NM_005979.1 /DEF=Homo sapiens S100 calcium-binding protein A13 (S100A13), mRNA. /FEA=mRNA /GEN=S100A13 /PROD=S100 calcium-binding protein A13 /DB_XREF=gi:5174658 /UG=Hs.14331 S100 calcium-binding protein A13 /FL=gb:BC000632.1 gb:NM_005979.1
210512_s_at	vascular endothelial growth factor	VEGF	68.8	A	385.1	P	5.59738	2.48475	9	A	167.9	P	18.6556	4.22153	3.5	A	45.5	P	13	3.70044	gb:AF022375.1 /DEF=Homo sapiens vascular endothelial growth factor mRNA, complete cds. /FEA=mRNA /PROD=vascular endothelial growth factor /DB_XREF=gi:3719220 /UG=Hs.73793 vascular endothelial growth factor /FL=gb:M32977.1 gb:AF022375.1 gb:NM_003376.1 gb:A
209094_at	dimethylarginine dimethylaminohydrolase 1	DDAH1	82.6	A	448.6	P	5.43099	2.44122	28.3	A	618.9	P	21.8693	4.45083	17.9	A	277.9	P	15.5251	3.95653	Consensus includes gb:AL078459 /DEF=Human DNA sequence from clone RP4-621F18 on chromosome 1p11.4-21.3. Contains the 3 end of the gene for ng,ng dimethylarginine dimethylaminohydrolase (EC 3.5.3.18), ESTs, STSs and GSSs /FEA=mRNA /DB_XREF=gi:5791502 /UG=H
204170_s_at	CDC28 protein kinase regulatory subunit 2	CKS2	72.3	A	389.8	P	5.39142	2.43067	10.9	A	596.1	P	54.6881	5.77315	20.1	A	192.8	P	9.59204	3.26184	gb:NM_001827.1 /DEF=Homo sapiens CDC28 protein kinase 2 (CKS2), mRNA. /FEA=mRNA /GEN=CKS2 /PROD=CDC28 protein kinase 2 /DB_XREF=gi:4502858 /UG=Hs.83758 CDC28 protein kinase 2 /FL=gb:NM_001827.1
204868_at	immature colon carcinoma transcript 1	ICT1	100.8	A	338.4	P	3.35714	1.74723	75.2	A	179.8	P	2.39096	1.25759	12.9	A	118.5	P	9.18605	3.19944	gb:NM_001545.1 /DEF=Homo sapiens immature colon carcinoma transcript 1 (ICT1), mRNA. /FEA=mRNA /GEN=ICT1 /PROD=immature colon carcinoma transcript 1 /DB_XREF=gi:4557656 /UG=Hs.9078 immature colon carcinoma transcript 1 /FL=gb:NM_001545.1
209605_at	thiosulfate sulfurtransferase (rhodanese)	TST	136.4	A	359.8	P	2.63783	1.39935	36.6	A	258.2	P	7.05464	2.81857	33	A	271.7	P	8.23333	3.04148	gb:D87292.1 /DEF=Homo sapiens mRNA for rhodanese, complete cds. /FEA=mRNA /PROD=rhodanese /DB_XREF=gi:1877030 /UG=Hs.248267 thiosulfate sulfurtransferase (rhodanese) /FL=gb:D87292.1
200017_at	ribosomal protein S27a	RPS27A	1218.4	P	1495.1	P	1.2271	0.295254	1235.5	P	1904.2	P	1.54124	0.62409	798.9	P	1362.9	P	1.70597	0.770593	gb:NM_002954.1 /DEF=Homo sapiens ribosomal protein S27a (RPS27A), mRNA. /FEA=mRNA /GEN=RPS27A /PROD=ribosomal protein S27a /DB_XREF=gi:4506712 /UG=Hs.3297 ribosomal protein S27a /FL=gb:BC001392.1 gb:BC005328.1 gb:NM_002954.1
AFFX-HSAC07/X00351_3_at	actin, beta	ACTB	4242.4	P	2958.8	P	0.697435	-0.519868	2551.1	P	3013.6	P	1.18129	0.240368	2687.5	P	4868.6	P	1.81157	0.857242	X00351 Human mRNA for beta-actin (_5, _M, _3 represent transcript regions 5 prime, Middle, and 3 prime respectively)
212588_at	protein tyrosine phosphatase, receptor type, C	PTPRC	2207.9	P	159.3	P	0.07215	-3.79286	2730.5	P	581.6	P	0.213001	-2.23107	2934.3	P	1636.4	P	0.55768	-0.842491	Consensus includes gb:Y00062.1 /DEF=Human mRNA for T200 leukocyte common antigen (CD45, LC-A). /FEA=mRNA /DB_XREF=gi:34275 /UG=Hs.170121 protein tyrosine phosphatase, receptor type, C
