# Supplementary material for: Global Gene Expression Profiling of Circulating Tumor Cells
Source: Oxford University Press journal article supplement (doi:10.1158/0008-5472.can-04-4330), 2005-06-15
Supplement: 00085472can044330-sup-smirnov_supplementary_table_2.xls [file 00085472can044330-sup-smirnov_supplementary_table_2.xls]

## Sheet: A) Primer Sequences
Oligonucleotide primer pairs used for real-time quantitative PCR gene expression measurements.
Genebank accession number is indicated for all genes.
1)	AF088867
Homo sapiens anterior gradient 2 homolog (Xenopus laevis) (AGR2), mRNA
a)	TTGCTTGACAACATGAAGAAAGC
b)	TTTCAAGTCTCAAGGCCTGACA
PRODUCT SIZE (BP): 101 bp
2)	NM_003226
Homo sapiens trefoil factor 3 (intestinal) (TFF3), mRNA
a)	GTGATTGCTGCCAGGCACT
b)	TTCGTTAAGACATCAGGCTCCA
PRODUCT SIZE (BP): 101
3)	NM_022464
Homo sapiens endoplasmic reticulum chaperone SIL1, homolog of yeast (SIL1), mRNA.
a)	AAATGGAAACCTGAAGGCCA
b)	GAGCCCATCACCCAACCAC
PRODUCT SIZE (BP): 101
4)	NM_012105
Homo sapiens beta-site APP-cleaving enzyme 2 (BACE2), transcript variant a, mRNA.
a)	GTGCTCTGAATGGGAGCCAG
b)	CCTCTACCTCAACGGGCAAA
PRODUCT SIZE (BP): 101
5)	NM_001545
Homo sapiens immature colon carcinoma transcript 1 (ICT1).
a)	TCGGGAAAGGCTGAGACAAA
b)	AGAAGAGCCCTCCCAGCTG
PRODUCT SIZE (BP): 101
6)	D87292
Homo sapiens thiosulfate sulfurtransferase (rhodanese) (TST), nuclear gene encoding mitochondrial protein, mRNA
a)	TTACTGTAACTGCGGCCGGT
b)	GCCTTGCACAGCAATTCTAAAAA
PRODUCT SIZE (BP): 101
7)	NM_002276
Homo sapiens keratin 19 (KRT19), mRNA.
GAGCATGAAAGCTGCCTTGG
GGGCTTCAATACCGCTGATC
PRODUCT SIZE (BP): 101
8)	NM_002407
Homo sapiens secretoglobin, family 2A, member 1 (SCGB2A1), mRNA.
a)	GCGCCTGCAGAGGCTATG
b)	CTGTCGTACACTGTATGCATCATCA
PRODUCT SIZE (BP): 101
9)	NM_002411
Homo sapiens secretoglobin, family 2A, member 2 (SCGB2A2), mRNA.
a)	CCAAACGGATGAAACTCTGAGC
b)	GAGCCAAAGGTCTTGCAGAAAG
PRODUCT SIZE (BP): 101
10)	NM_002963
Homo sapiens S100 calcium binding protein A7 (psoriasin 1) (S100A7), mRNA.
a)	GATTGACAAGCCAAGCCTGC
b)	CAAAGACGTCGGCGAGGTAA
PRODUCT SIZE (BP): 101
11)	NM_000898
Homo sapiens monoamine oxidase B (MAOB), nuclear gene encoding mitochondrial protein, mRNA.
a)	TGTCCCGTTGTGTGGGTTTA
b)	TGGAGACACACCGCACAAAA
PRODUCT SIZE (BP): 101
12)	NM_030777
Homo sapiens solute carrier family 2 (facilitated glucose transporter), member 10 (SLC2A10), mRNA.
a)	ACAGTTATCAGGGATTTTTATTTGTAGTC
b)	TTGCCAAACCTTGTATCCAAAGT
PRODUCT SIZE (BP): 91
13)	NM_003221
Homo sapiens transcription factor AP-2 beta (activating enhancer binding protein 2 beta) (TFAP2B), mRNA
a)	AGAGCTGGTTGACTGAGACGC
b)	GTTGGGAGACGGGTGAGGT
PRODUCT SIZE (BP): 101
14)	NM_002652
Homo sapiens prolactin-induced protein (PIP), mRNA.
a)	TGCCTATGTGACGACAATCCA
b)	GCAGATGCCTAATTCCCGAA
PRODUCT SIZE (BP): 105
15)	NM_000125
Homo sapiens estrogen receptor 1 (ESR1), mRNA.
a)	GGAAAAGGCTCAAATGCCAA
b)	AAAGCAAAGCTGCGACAAAAC
PRODUCT SIZE (BP): 101
16)	NM_017422
Homo sapiens calmodulin-like 5 (CALML5), mRNA.
a)	TTTTGTGCTGGGACTCTCCG
b)	GCGCAAAGCCTTCCTCC
PRODUCT SIZE (BP): 76
17)	J02871
Homo sapiens cytochrome P450, family 4, subfamily B, polypeptide 1 (CYP4B1), mRNA.
a)	AAATGCAGCAGAAACTTACATTCCA
b)	CTATTTGGTGGTACCCAGCCA
PRODUCT SIZE (BP): 101
18)	AF188747
Homo sapiens kallikrein 2, prostatic (KLK2), mRNA.
a)	GCTCGGGATTGGTGTGAAGA
b)	AGACCATGACATTCCCCCAC
PRODUCT SIZE (BP): 101
19)	U22178
Homo sapiens microseminoprotein, beta- (MSMB), transcript variant PSP57, mRNA.
a)	TGAATGTTCTCCTGGGCAGC
b)	TGAATCTCCTGGAACTCCCTCAT
PRODUCT SIZE (BP): 101
20)	NM_000905
Homo sapiens neuropeptide Y (NPY), mRNA.
a)	TCCAGCCCAGAGACACTGATT
b)	AGGGTCTTCAAGCCGAGTTCT
PRODUCT SIZE (BP): 81
21)	NM_000790
Homo sapiens dopa decarboxylase (aromatic L-amino acid decarboxylase) (DDC), mRNA.
a)	AGCCAGCTGCAGGAATCAAA
b)	CACAGACAGCTGAGTTCCATGAAG
PRODUCT SIZE (BP): 101
22)	AF162704
Homo sapiens androgen receptor (dihydrotestosterone receptor; testicular feminization; spinal and bulbar muscular atrophy; Kennedy disease) (AR), mRNA.
a)	TCTACCAGCTCACCAAGCTCC
b)	CACGCTCACCATGTGTGACTT
PRODUCT SIZE (BP): 101
23)	NM_002151
Homo sapiens hepsin (transmembrane protease, serine 1) (HPN), transcript variant 2, mRNA.
AAGCCAGGCGTCTACACCAA
GGTCAGAGCTGGGTCACCAT
PRODUCT SIZE (BP): 101
24)	NM_006770
Homo sapiens macrophage receptor with collagenous structure (MARCO), mRNA.
a)	CGTCAGGATTGTCGGCAGTA
b)	TGGCATCAGAATTTTGCCACT
PRODUCT SIZE (BP): 101
25)	NM_001443
Homo sapiens fatty acid binding protein 1, liver (FABP1), mRNA.
a)	GTGTCGGAAATCGTGCAGAA
b)	AGCTCACATTCCTCCCCCA
PRODUCT SIZE (BP): 101
26)	NM_007127
Homo sapiens villin 1 (VIL1), mRNA.
a)	GTGTGGACCCCAGCAGGA
b)	CTTCCATCGAGGCAGAGCA
PRODUCT SIZE (BP): 101
27)	NM_001181
Homo sapiens asialoglycoprotein receptor 2 (ASGR2), transcript variant 1, mRNA.
a)	GCACACCTCTGGCTAACCCA
b)	TTCCCCATACCCCTGTCTCA
PRODUCT SIZE (BP): 101
28)	NM_021778
Homo sapiens a disintegrin and metalloproteinase domain 28 (ADAM28), transcript variant 2, mRNA.
a)	TCATAAAGACACAAACGCACTTCC
b)	TTGCTTAGCTGTTGCTTCATGC
PRODUCT SIZE (BP): 101
29)	NM_004363
Homo sapiens carcinoembryonic antigen-related cell adhesion molecule 5 (CEACAM5), mRNA.
a)	CCACCAAGATCAAGCAGAGAAAA
b)	TTATCAAATTGCTGTAAGAGTGGATAGC
PRODUCT SIZE (BP): 93
30)	NM_005979
Homo sapiens S100 calcium-binding protein A13 (S100A13),mRNA.
a)	GCCCCTTGAGGACATCAGC
b) TGAAGAAGGTGGTGACCACG
PRODUCT SIZE (BP): 101
31)	NM_020672
Homo sapiens S100-type calcium binding protein A14 (LOC57402), mRNA.
a)	CCTGTACCCTAGCCTGCACC
b) ACCCATGAGCTCCCCAGAG
PRODUCT SIZE (BP): 101
32)	NM_080388
Homo sapiens S100 calcium binding protein A16 (S100A16), mRNA.
a)	TGATGTTCCTGCCAAATTCCT
b) TGCTACCACTGCCACCAAGAG
PRODUCT SIZE (BP): 101
33)	AF022375
Homo sapiens vascular endothelial growth factor (VEGF),mRNA.
a)	AGATCCGCAGACGTGTAAATGTT
b) TCGGCTTGTCACATCTGCAA
PRODUCT SIZE (BP): 101
34)	NM_019010
Homo sapiens keratin 20 (KRT20), mRNA.
a)	GAAGGAGATGCTGCTGAGGTT
b) CCCCTTCTAATCACTGCAGAGTATTAAT
PRODUCT SIZE (BP): 108
35)	NM_001648
Homo sapiens kallikrein 3, (prostate specific antigen) (KLK3),mRNA
a)	ATTGAAGTCCTCCAGACAACCCTC
b) CACGTATAACAGCTCTTTATTTCTG
PRODUCT SIZE (BP): 77
36)	NM_001101
Homo sapiens actin, beta (ACTB),mRNA.
a)	gatgagattggcatggcttt
b) gtcaccttcaccgttccagt
PRODUCT SIZE (BP): 107
37) NM_002954
Homo sapiens ribosomal protein S27a (RPS27A),mRNA.
a)	tcgtggtggtgctaagaaaa
b) tctcgacgaaggcgactaat
PRODUCT SIZE (BP): 141

## Sheet: B) Samples and Results RT-PCR 
Sample ID	Patient ID	Study	Cancer Type	Gender	Stage at Blood Draw	Sample Originator	CTC Count	ACTB	RPS27A	KRT19	AGR2	TFF3	SIL1	BACE2	ICT1	TST	SCGB2A1	S100A7	MGB1	CLSP	TFAPB2	ESR1	SLC2A10	PIP	CYP4B1	MAOB	KLK2	NPY	MSMB	DDC	AR	HPN	KLK3	ADAM28	ASGR2	FABP1	MARCO	VIL1	KRT20	CEACAM5	S100A13	S100A14	S100A16	VEGF
1C	029FC	IMMC007	Colorectal	M	T3N0M0	Fox Chase Cancer Center	2	12.1453	13.7492	3.55672	2.16242	6.49925	3.96743	5.15889	5.63736	8.13843	0	0.207149	2.80573	0.403948	0.0796358	2.53499	3.44331	0	1.03789	2.41288	0.0203612	0	0.0789376	0.415055	0.258614	0.94286	0	7.42764	8.42026	6.5377	6.61228	1.72278	4.80447	4.68683	5.5088	4.16375	2.39055	0.329593
2C	030JLM	IMMC007	Colorectal	F	T3N2M1	Fox Chase Cancer Center	1	14.5075	13.7492	1.49102	4.00066	7.66872	6.12871	5.36421	8.68636	10.8574	0	0.198659	1.84459	0.00794591	0.00632972	3.93506	2.00969	0.928108	0.380913	4.55592	0.0614205	0	0.0623013	0.0463644	0.0694743	0.104885	0	7.00263	11.5538	3.88719	11.6828	2.09824	1.1652	2.39479	6.47133	1.53398	1.73378	2.33379
3C	036GB	IMMC007	Colorectal	M	T2N1M0	Fox Chase Cancer Center	2	15.624	13.7492	4.7078	6.6761	9.09023	7.15449	7.7925	8.82604	11.6506	0	1.05958	3.2842	0.644484	0.31796	4.01169	2.05871	1.82086	3.01092	6.57373	1.17508	0	0.396832	0.0402599	0.119792	1.02822	0	8.75877	11.1419	6.19331	12.5957	4.10156	4.80355	5.31999	8.51549	7.37847	7.19588	4.33978
4C	037FM	IMMC007	Colorectal	M	T3N1M0	Fox Chase Cancer Center	1	14.5012	13.7492	6.96887	7.47951	8.84313	7.11621	7.6705	9.33309	11.4315	0	2.20338	5.78058	0.139589	0.00691904	0.000771876	4.3767	0.643744	0.900138	4.92116	1.30683	1.43093	0.725161	0.520075	1.28283	0.173054	0	9.21	11.0876	7.61751	12.4239	3.89071	6.03425	6.21775	8.00522	8.80487	6.53244	2.19911
5C	038PCS	IMMC007	Colorectal	F	T3N0M1	Fox Chase Cancer Center	1	15.1345	13.7492	1.77635	2.76629	7.04988	7.10378	5.718	8.1543	11.8063	0	0.493378	2.08037	0.175828	0.0163519	3.35209	1.68583	0.00546414	0.134377	5.41151	0.544319	0	0.0821995	0.0485516	0.224231	0.165529	0	7.22397	11.1505	0.306387	10.1263	4.34239	0	3.00161	8.62495	2.11547	0	4.63455
6C	039JJB	IMMC007	Colorectal	M	T2N0M0	Fox Chase Cancer Center	1	13.4146	13.7492	1.62718	2.78261	6.88636	2.85001	7.11069	6.98775	10.4343	0	1.234	3.5257	0.171285	0.123005	2.56266	3.26727	0	0.239143	0.00060885	0.480187	1.51609	1.50158	0.174398	1.07847	0.0915775	0	7.75444	9.19878	0.595338	6.99619	4.24362	0	0.277117	6.2303	0	4.27274	3.11596
7C	043RWS	IMMC007	Colorectal	M	T3N1M0	Fox Chase Cancer Center	5	15.3002	13.7492	4.33525	2.92804	8.50555	7.8825	6.11492	9.2239	10.7699	0	0.10301	2.89079	0.129786	0.168119	3.34914	4.22149	0.000172076	0.165348	5.43922	0.125041	0.284187	0.180978	1.19297	0.80513	1.0993	0.540869	6.97449	11.7786	4.43974	13.048	2.89218	4.79825	5.42602	7.23448	6.73138	5.45727	3.49327
8C	044LJF	IMMC007	Colorectal	M	T3N0M1	Fox Chase Cancer Center	3	13.2037	13.7492	5.22019	3.46718	6.05238	4.9723	7.33914	8.04723	10.1525	0	0.290572	4.07319	0.0428151	0.0174643	3.95276	2.13533	1.82295	0.230107	4.73052	0.22093	0.543404	0.174147	0.444369	0.448307	1.28748	0	8.75577	9.32956	1.48728	9.35459	2.86671	8.07212	6.35582	6.49957	7.21581	5.14068	2.43723
9C	046NLH	IMMC007	Colorectal	F	T3N1M1	Fox Chase Cancer Center	4	12.8177	13.7492	1.76094	3.28033	10.207	5.09015	8.98927	7.67461	9.61952	0	0.478965	4.14638	0.475708	0.242594	3.93135	5.30558	0.257847	0.281361	7.76537	0.00485598	0.360326	0.425093	1.44422	0.405538	0.353242	0	7.47538	7.73923	0.700962	7.49028	0.292513	0.664229	1.03782	7.28568	4.33459	7.93081	1.69593
10C	047DJB	IMMC007	Colorectal	M	T3N0M0	Fox Chase Cancer Center	4	15.2691	13.7492	6.63282	9.96715	9.62158	4.91564	5.85634	8.03972	11.9708	0	0.439733	5.33647	0.141503	0.00139675	1.87005	0.230647	0.000275885	0.184407	10.3411	0.155828	2.03412	0.610665	2.30306	2.73441	0.62875	0	5.83633	11.6182	5.50636	11.4298	6.44487	7.12351	8.05891	7.32636	7.58362	6.81168	0.738706
11C	048TVS	IMMC007	Colorectal	M	TxNxM1	Fox Chase Cancer Center	2	15.1027	13.7492	0.987699	0.298572	5.7902	7.84256	5.68931	9.27563	11.5666	0	0.210603	2.3375	0.0493055	0.237358	5.01599	2.18198	0	5.28228	6.34719	0.181931	0.410107	0.0596443	0.0296595	2.43999	0.741582	0	7.19299	11.9194	1.49084	12.5084	5.82114	0.425103	0	7.96472	1.40571	0.000739357	4.44324
12C	049AOF	IMMC007	Colorectal	M	T3N0M0	Fox Chase Cancer Center	5	16.0865	13.7492	4.32093	1.72997	8.98428	7.13883	6.7272	9.11138	11.8952	1.99637	1.95803	6.10584	0.748645	0.804047	0	3.74505	0.528584	0.897318	7.73158	1.56483	0	1.18505	0.333568	1.3948	1.12105	0	7.31305	11.8164	2.2577	13.0703	6.04181	5.12664	4.94951	7.54785	7.77359	5.34931	2.65699
13C	050BP	IMMC007	Colorectal	M	T3N0M1	Fox Chase Cancer Center	1	15.7865	13.7492	5.17402	8.19522	7.59166	8.07631	8.12109	9.07307	11.9328	0	3.04518	2.52743	2.3401	0.00612541	5.39435	4.38483	0.112156	1.29456	6.32827	1.12621	0	1.46323	1.88824	0.494123	2.05262	0	7.98598	8.68283	4.74102	7.92035	5.19093	1.46323	0	6.98562	2.78512	4.09989	2.7214
14C	001JM	IMMC007	Colorectal	M	T2N0M0	Fox Chase Cancer Center	2	16.7533	13.7492	2.44642	1.13069	9.89927	9.00034	10.6023	11.8184	13.1576	0	2.34674	2.3936	1.51532	2.58074	6.89292	5.45374	5.39737	1.7579	0.1126	1.40984	0	1.63197	1.30914	2.14239	2.45381	0	10.719	10.7934	3.36753	13.7694	7.7149	0	0	8.82978	0	0.0998443	8.22452
15C	002MTD	IMMC007	Colorectal	F	T3N1M1	Fox Chase Cancer Center	8	13.0848	13.7492	4.67667	6.3093	7.48266	7.32735	6.7653	9.71123	9.95719	0	2.05674	1.74705	0.399192	0.0309921	5.61649	4.21515	0.202811	0.307203	2.86664	0.0225422	1.3675	0.797716	0.00510083	0.150652	1.68361	0	7.7056	9.95644	4.93748	11.3641	3.77858	4.61545	4.96165	7.83328	6.8958	6.54938	0
16C	003MEO	IMMC007	Colorectal	F	T4N2M1	Fox Chase Cancer Center	3	14.9683	13.7492	3.51258	8.50923	9.49807	8.75711	8.8882	10.3597	11.3411	0	0.978197	0.318096	0.733958	0.167797	3.45259	1.36939	0	0.0173323	5.15948	0.23506	0	0.131524	0.277728	0.709559	0.978197	1.39512	9.65487	9.53023	7.20782	12.0067	5.43842	1.96374	4.17598	9.15776	8.57296	7.40034	1.71953
17C	004ELN	IMMC007	Colorectal	F	TxNxM1	Fox Chase Cancer Center	7	16.4424	13.7492	7.53898	4.17163	11.0328	9.06675	9.23143	10.1807	14.3171	0	5.18255	4.29802	0.823759	1.11157	5.35572	4.75617	1.33494	0.85411	8.9253	2.06497	0	3.16826	1.69882	3.10656	4.18776	0	8.41176	10.4881	7.06157	12.7176	8.40438	4.23732	2.41743	10.4693	9.9264	9.67936	4.932
18C	006REO	IMMC007	Colorectal	M	T3N2M1	Fox Chase Cancer Center	13	13.3166	13.7492	6.09488	6.97487	10.6651	8.4928	7.50846	10.3449	10.4642	0.00824014	2.11444	1.10138	0.408922	0.962324	5.99536	1.02411	0.000242895	0.0796299	3.39749	0.159918	0	0.0828997	1.55034	0.6655	0.858039	0	7.71866	7.76975	9.18257	10.6058	4.29836	5.48711	5.84567	9.21501	5.18085	7.34053	4.10642
19C	007HDS	IMMC007	Colorectal	F	T2N2M0	Fox Chase Cancer Center	1	14.1531	13.7492	4.64652	5.54761	6.54875	7.28201	7.46306	9.01539	10.6397	0	0.0974506	0.0965585	0.0385974	0.0189884	3.83566	2.66179	3.13305	0.114002	3.60943	0.0166639	0	0.114883	0.0036845	1.79451	0.0466256	0.00256744	9.52847	10.4238	2.699	11.2337	2.87968	4.89281	6.17493	7.58837	6.67347	4.72462	0.213904
20C	009YT	IMMC007	Colorectal	M	T3N0M0	Fox Chase Cancer Center	1	13.272	13.7492	2.90396	0.0694057	8.96587	5.7489	9.06406	8.9409	10.814	0	1.18397	2.24222	0.124049	0.00889629	3.86475	4.76228	0.045408	0.607646	6.17359	0.0926734	0.69914	0.607646	0.834438	2.86498	1.07205	0	9.69429	9.34546	1.2153	11.481	4.08003	0	2.00286	7.40178	3.95568	7.27509	4.13021
21C	010DAD	IMMC007	Colorectal	F	T3N1M0	Fox Chase Cancer Center	3	16.7465	13.7492	2.43827	0.937346	10.33	8.38708	8.437	9.6721	13.1714	0	1.22024	0.121179	0.476734	0.109301	3.26412	2.0498	2.09501	0.275636	8.68274	0.251406	2.33119	0.308076	1.33555	4.75572	2.99618	0	8.93053	10.8756	1.63292	13.8234	8.68383	0	1.4849	9.0436	0.0177891	6.68877	4.07199
22C	011JTB	IMMC007	Colorectal	F	T3N1M0	Fox Chase Cancer Center	8	14.6201	13.7492	7.78654	7.48904	9.65782	8.11434	8.39454	10.4838	11.084	0	5.24648	2.36071	2.54603	1.23454	5.7672	4.55097	1.86399	1.80163	4.40129	0.644529	0	1.94041	3.98648	2.36071	1.63381	0	9.20396	10.3785	10.0413	10.2065	7.54789	8.96384	8.88882	7.1	7.9559	8.78399	3.1464
23C	012TFM	IMMC007	Colorectal	M	T1N1M0	Fox Chase Cancer Center	10	18.3872	13.7492	4.45943	5.6717	9.80825	9.93412	10.3171	11.5753	14.8184	0	2.04848	3.62496	1.03936	2.0669	5.68295	7.09629	0.267061	0.965671	10.2108	0.791614	2.22701	1.21566	0.569293	6.50327	4.89282	0	11.1574	11.6272	3.75988	15.3563	10.761	0	2.52562	9.90021	5.15744	8.03216	8.54104
24C	014AB	IMMC007	Colorectal	F	T3N1M0	Fox Chase Cancer Center	1	15.5917	13.7492	0.556741	2.83538	5.19264	8.70159	3.95923	9.97551	11.3687	0	1.73429	1.68793	0.328275	0.084228	5.29836	0	0	6.57082	9.57671e-05	0.204209	0	0.93684	1.38998	0.0573896	0.519408	0	7.82784	10.765	0.783619	14.6078	2.92851	0	2.41513	8.96107	0.27879	1.78341	6.15056
25C	015DH	IMMC007	Colorectal	M	T3N2M1	Fox Chase Cancer Center	28	14.8235	13.7492	11.5457	13.6288	12.3093	6.4241	8.83856	10.5084	12.0744	0	0.471215	1.52888	0.0605153	0.471215	5.11547	3.30702	0.0019241	0.0761329	4.07657	0.0498389	0.350049	0.947226	6.84568	2.33509	4.38034	0	9.06363	9.15967	14.0788	10.5651	10.606	11.3772	11.7672	8.76627	12.6778	11.9134	7.76777
26C	016DBR	IMMC007	Colorectal	M	T3N0M0	Fox Chase Cancer Center	3	15.7893	13.7492	1.60531	0.262742	4.73724	8.51995	7.20152	10.0267	11.662	0	2.53487	1.2876	0.44393	0.139775	2.9304	0.312527	0.424126	0.322342	4.69654	0.700648	0	0.371918	0.0218868	0.590737	1.81862	0	8.86887	11.4635	1.1042	13.4922	4.07179	0	0	9.57642	1.76227	2.70278	4.0209
27C	017KB	IMMC007	Colorectal	M	T3N2M1	Fox Chase Cancer Center	105	15.9386	13.7492	9.33462	12.1269	12.2681	7.26432	6.58855	10.1851	11.115	1.5316	1.77539	2.07091	2.32654	0.389201	2.71465	4.70932	0.000338517	1.51542	6.71298	0.541644	0	0.553584	4.66414	0.0836225	1.59074	0	8.46996	10.5314	12.0032	12.638	8.32638	10.3876	11.4253	8.63868	11.1101	10.8003	6.93982
28C	019ED	IMMC007	Colorectal	F	T3N1M1	Fox Chase Cancer Center	17	13.7961	13.7492	2.18653	0.239492	5.09728	6.48617	6.4464	8.83019	9.52564	0	0.166862	0.28947	0.129128	0.00562819	4.72285	2.02996	1.19725	0.27093	3.60514	0.0188522	0.633562	0.0541822	0.275366	0.123234	0.0540789	0	9.26077	9.51057	2.9454	10.0642	3.00002	4.23703	4.84576	6.34625	5.18359	2.83554	1.06514
29C	024LK	IMMC007	Colorectal	F	T1N1M1	Fox Chase Cancer Center	2	16.4008	13.7492	2.14398	0.0804927	2.80062	8.84036	11.2134	10.9709	12.1041	0	1.36621	4.68218	0.237591	0.401356	6.42686	0	0.0467503	0.0999332	3.44217	0.669938	2.95805	1.01532	0.0255177	2.07885	0.516361	6.13338	10.4545	9.10975	1.92821	12.33	1.15569	0	0	9.48359	0	0	2.80062
30C	026AZ	IMMC007	Colorectal	M	T3N0M1	Fox Chase Cancer Center	6	14.6455	13.7492	5.11265	6.34069	8.66267	6.7564	7.53145	9.76173	10.9447	0	0.432594	0.94179	0.542147	0.0106516	3.82144	0.157005	0.0328382	2.84835	4.5958	0.193951	1.5141	0.123667	1.66574	2.24962	0.460018	3.21763	8.7495	11.2384	6.37961	12.0004	3.83168	5.71738	6.58622	8.22338	1.86695	5.37424	4.55488
1P	JM103	IMMC 11	Prostate	M	A / B	Jose G. Moreno, M.D. Thomas Jefferson University	3	13.4816	13.7492	0.616706	0.170565	0.0641182	6.53553	8.04073	8.69032	9.83846	0.00268591	0.162008	0.513831	0.4857	0.143501	5.36649	3.33745	0.38636	0.472909	3.33881	0.122487	0	0.176645	0.00211078	0.0373691	0.849183	0	9.73612	9.80508	0.488636	7.72455	0.278541	0	0	7.06302	0.0328176	0	0.698432
2P	8RG	IMMC 11	Prostate	M	A / B	Jose G. Moreno, M.D. Thomas Jefferson University	8	12.3658	13.7492	0.491378	0.231009	7.29902	5.66169	8.83597	8.40354	9.3818	0	0.338028	0.581263	0.0702673	0.0541888	6.22492	3.95207	4.73396	0.0217357	1.89416	0.0162692	0	0.0123881	0.0868107	0.19573	0.0674238	4.08756	10.2567	7.17907	0.410983	7.72967	0.35078	2.65496	1.04075	7.62115	0.0229943	6.64592	0.737645
3P	41CRM	IMMC 11	Prostate	M	D1.5	Jose G. Moreno, M.D. Thomas Jefferson University	26	16.2409	13.7492	2.07277	1.22817	8.41621	9.04767	7.97731	11.5386	12.6486	0.140241	1.81968	2.06896	0.687343	0.0699185	5.72153	5.20328	3.71708	1.11446	6.52865	0.882325	0	0.941873	0.174689	0.491167	0.687343	0	8.77857	12.6477	0.42056	15.642	3.5426	0	0	10.5423	6.15015	6.49621	6.82891
4P	85DLM	IMMC 11	Prostate	M	D1.5	Jose G. Moreno, M.D. Thomas Jefferson University	5	15.6064	13.7492	1.41206	0.0122799	7.34482	8.31891	8.46042	9.98658	11.6538	0	0.602726	3.19813	0.383919	0.100424	6.28205	2.85032	3.63528	0.163445	0.000345262	0.1498	0	1.00829	0.00598926	0.553159	0.124381	5.16036	8.53922	10.0958	1.28287	13.4762	1.46365	0	0.481362	8.13446	0	0	4.17078
5P	96EJK	IMMC 11	Prostate	M	D1.5	Jose G. Moreno, M.D. Thomas Jefferson University	5	14.09	13.7492	0.689631	1.58158	8.18353	6.2685	7.11493	8.90919	10.0141	0	0.202538	2.3218	0.900798	0.0262204	3.8707	3.51391	1.53261	0.0777699	0.00835913	0.0226142	0.454646	0.0628612	0.000396192	0.0821074	1.26744	0.12838	8.96195	9.93495	0.235178	10.688	0.144468	1.11552	0	8.01352	0	1.65828	3.99503
6P	112RRP	IMMC 11	Prostate	M	D1.5	Jose G. Moreno, M.D. Thomas Jefferson University	7	15.6564	13.7492	1.1449	0.6466	6.9591	8.54749	8.17881	10.113	11.9829	0	1.77635	1.2968	0.464107	0.010588	3.49032	4.40453	0.0268	0.0543522	4.11473	0.25334	0	0.347462	0.0148866	1.0308	0.654805	0	9.52397	11.8958	0.419859	12.2752	2.70505	0	0	8.20021	0.0866542	0.563331	4.28077
7P	160HG	IMMC 11	Prostate	M	D2	Jose G. Moreno, M.D. Thomas Jefferson University	5	15.2964	13.7492	5.74913	7.32643	6.56889	7.97383	9.92171	10.9619	11.027	0	1.00638	1.30579	8.031	0.0851269	7.17002	3.01782	4.92808	0.463241	0.020872	2.02289	3.1288	6.40384	0.304107	1.55484	0.270239	12.3991	10.1767	9.04038	1.26001	11.1983	0.819459	0.815381	0	9.36572	0.0269164	2.26642	3.35989
8P	83GAK	IMMC 11	Prostate	M	D2	Jose G. Moreno, M.D. Thomas Jefferson University	5	13.2543	13.7492	4.31477	9.29219	9.22146	4.57052	8.43881	8.79901	10.6394	0	4.56994	4.33255	0.00765124	0.00670387	4.51917	2.01045	3.38779	0.0614821	0.00473216	2.92679	0	1.8315	2.35645	3.08933	0.722857	11.0474	9.92568	8.16169	0.340136	10.5592	0.597184	1.21995	0.140847	9.37316	7.56437	5.67374	4.79338
9P	JM105	IMMC 11	Prostate	M	D3	Jose G. Moreno, M.D. Thomas Jefferson University	4	14.0827	13.7492	0.745794	0.134705	2.08907	6.58758	7.3409	8.79439	9.43983	0	0.286871	0.11267	0.0484132	0.00507728	3.78147	0.047626	1.21234	0.0327868	0.00924757	0.00511783	0	0.042499	1.63151	0.106636	0.0640668	0.191394	10.0878	9.43242	6.92664	11.8204	0.848793	4.2117	0	8.77587	0.00171609	3.97864	0.559568
10P	JM101	IMMC 11	Prostate	M	D3	Jose G. Moreno, M.D. Thomas Jefferson University	7	14.8303	13.7492	0.742784	2.27229	6.64371	8.25013	7.08136	10.2349	11.3374	0	0.415443	1.35406	0.42673	0.0164859	4.07701	3.40697	2.26782	0.243746	2.5917	0.0341356	0.260063	0.536482	0.442702	0.240095	1.78208	5.26962	9.07955	11.3941	4.59395	9.70522	0.87697	0	0	9.20351	0	2.3548	5.08287
11P	9AM	IMMC 11	Prostate	M	D3	Jose G. Moreno, M.D. Thomas Jefferson University	12	16.1667	13.7492	2.7747	1.94212	6.89239	8.67934	8.1067	10.865	11.4557	0.269399	3.04445	2.46531	0.383353	0.26768	2.52591	2.88255	3.53906	5.0451	0	0.746444	0	0.584602	0.786623	1.96882	0.810439	0	9.91085	11.4864	2.76101	13.0715	4.44267	0	0	11.0506	0	1.47895	5.75237
12P	89PD	IMMC 11	Prostate	M	D3	Jose G. Moreno, M.D. Thomas Jefferson University	7	15.2863	13.7492	3.86006	0.152354	5.93954	7.65077	7.21281	9.8704	9.73103	0	1.09677	0.235851	2.63433	0.0102365	0.114825	3.72451	8.63381e-05	0.515466	0.000727317	5.34316	7.76065	5.58302	6.63659	4.72286	4.44494	14.2261	9.93483	9.25003	6.53335	10.8183	0.864036	2.83813	0	8.66195	0	4.35209	0.641248
13P	110LJC	IMMC 11	Prostate	M	D3	Jose G. Moreno, M.D. Thomas Jefferson University	12	13.3004	13.7492	1.42182	0.220301	5.38449	6.62555	7.52761	9.89505	9.72021	0	4.93442	0.950771	2.87941	0.0169714	6.18605	3.09122	0	7.67159	4.6747	0.0227704	0	0.0187206	0.000963058	1.65787	0.0661109	6.27344	8.79228	7.927	4.24308	9.95067	4.0624	0	0.309314	7.85931	0.00164955	3.133	3.2131
14P	189HFB	IMMC 11	Prostate	M	D3	Jose G. Moreno, M.D. Thomas Jefferson University	6	15.8039	13.7492	3.614	4.51948	6.33653	8.76224	9.30771	10.2661	11.619	0	2.32721	1.21399	0.200763	0.836116	5.13039	3.87912	1.129	0.246761	5.49478	0.186812	0	5.76895	0.28524	3.93234	3.7858	10.6423	9.53204	11.6653	1.10448	14.2435	3.37349	0	0	9.11696	0.0547914	0	2.19291
15P	CM001	IMMC 31	Prostate	M	D3	Ken Pienta, M.D. University of Michigan Medical School	12	16.397	13.7492	10.5022	13.4328	11.9503	9.54701	11.7114	12.416	13.5247	2.86337	3.22652	4.326	1.21772	1.37787	7.11526	8.11738	0.0428109	0.0728511	13.9582	8.83873	18.5676	11.4748	1.16618	9.10301	10.1237	20.6493	12.7465	9.72022	2.77713	7.44621	7.2811	0	2.18482	10.7157	0	0.0404436	4.93338
16P	KZ008	IMMC 31	Prostate	M	D3	Ken Pienta, M.D. University of Michigan Medical School	3	15.0651	13.7492	1.61616	3.0378	7.17517	5.9402	7.04413	8.26007	12.1591	0	0.315483	0.88106	0.184381	0.0350818	3.27176	2.80178	0.637831	1.59987	7.64685	3.09704	0.672522	4.07202	0.395066	4.23782	2.82999	12.4483	7.42898	10.4216	0.550662	6.39619	7.17654	0	0	8.17266	0.165905	2.62386	3.41833
17P	JS009	IMMC 31	Prostate	M	D3	Ken Pienta, M.D. University of Michigan Medical School	63	15.1598	13.7492	10.3278	5.53883	11.5083	8.85955	8.63041	10.4512	12.2795	2.7327	1.14831	1.72882	4.87819	0.497048	3.33598	7.15223	2.04987	0.680812	7.77846	8.22568	0	10.8408	0.143034	9.25909	6.28349	16.262	8.48892	9.6808	1.14604	11.5274	6.56632	0	3.05661	8.76793	0	5.61674	2.18761
18P	VN010	IMMC 31	Prostate	M	D3	Ken Pienta, M.D. University of Michigan Medical School	77	16.8947	13.7492	4.71275	10.0947	12.2254	9.2645	9.73263	10.5252	13.0182	1.11518	1.63105	2.03699	0.694	0.258795	2.44889	7.64567	8.12965e-05	0.0190034	11.2595	9.40644	1.73004	9.14419	10.2773	10.1478	9.06831	17.4049	7.222	12.5168	7.27152	11.479	8.25124	4.77917	0	10.1458	6.21095	8.46613	5.77744
19P	DK011	IMMC 31	Prostate	M	D3	Ken Pienta, M.D. University of Michigan Medical School	27	14.7569	13.7492	7.72114	10.4198	7.28542	7.07245	6.46726	10.035	11.7503	1.55995	1.94271	1.27495	0.312521	0.0457926	5.99037	4.78576	0.000542714	0.7511	7.23119	6.73784	12.1034	6.42839	0.0296135	6.57861	5.90344	14.3951	9.08494	10.543	1.17832	7.00713	4.3181	0	0	8.97956	0.0495439	5.42751	0.219847
20P	DH018	IMMC 31	Prostate	M	D3	Ken Pienta, M.D. University of Michigan Medical School	121	14.7676	13.7492	6.90292	2.26499	5.70827	7.37047	6.2644	9.39745	10.7627	0.419469	0.112625	0.161306	0.057714	0.163557	4.0657	5.03163	0.00124642	0.0127281	4.00424	5.17362	6.97577	6.18872	4.16418	5.95441	3.8354	12.5649	6.90323	11.2863	0.730449	13.1381	1.18565	4.09401	0	8.71034	3.24714	2.16462	4.97749
21P	EB016	IMMC 31	Prostate	M	D3	Ken Pienta, M.D. University of Michigan Medical School	15	13.5947	13.7492	6.81474	8.4245	6.29719	4.94995	7.08361	8.69396	9.95941	0	0.372841	0.924118	5.07009	0.00966049	3.40472	3.74356	0	3.71097	0.00795678	4.80175	4.89589	4.89298	0.167472	6.26388	4.5194	13.183	8.70431	9.42983	0.696505	7.79872	0.765593	5.67377	2.30218	6.26131	0	0.00109096	2.38242
22P	TP017	IMMC 31	Prostate	M	D3	Ken Pienta, M.D. University of Michigan Medical School	4	13.3275	13.7492	2.00201	2.59547	6.03614	5.72491	7.45171	8.43359	10.0133	0	0.217927	0.59116	0.179715	0.00231075	5.06735	4.30544	0.000427569	3.0319	0.309251	0.126834	0	0.0868465	1.3878	2.21451	1.16587	7.42366	7.75299	7.86035	0.306836	7.22397	2.21451	0	0	7.31542	0	0	4.87695
23P	RP019	IMMC 31	Prostate	M	D3	Ken Pienta, M.D. University of Michigan Medical School	19	14.0338	13.7492	4.04688	14.1008	16.1094	7.51417	10.5118	10.331	11.2331	0	0.518909	1.17904	0.278308	0.00491494	3.22293	7.13893	0.00323453	6.80101	0.0112237	6.97394	3.2335	11.6573	0.0158719	9.73644	9.38931	18.5136	9.22918	9.66526	0.926074	9.62666	1.27501	0	0	7.71356	0	0	6.60381
24P	MK022	IMMC 31	Prostate	M	D3	Ken Pienta, M.D. University of Michigan Medical School	8	16.6587	13.7492	1.3724	1.72479	0.731902	9.91325	8.27788	11.7443	13.3708	0	1.72259	2.13253	0.865721	0.160973	2.51897	5.67644	0.0028137	0.112655	9.26519	0.286809	0	0.584389	0.0666985	0.154449	5.48335	2.48167	7.78421	13.248	2.03468	14.4701	6.57336	0	0	10.7829	0	6.22401	5.59145
25P	RC023	IMMC 31	Prostate	M	D3	Ken Pienta, M.D. University of Michigan Medical School	6	17.3978	13.7492	6.6469	9.80023	12.1482	8.38878	9.77132	10.3802	14.1078	5.87142	2.48886	2.87765	0.535813	0.78458	0	2.58741	0.502522	0.107312	10.1593	3.04307	10.284	10.6126	0.278942	8.32252	6.46714	16.2488	10.103	10.3403	2.23892	10.9253	9.63725	0	0	9.72302	0.0174987	3.0256	7.91344
26P	JN027	IMMC 31	Prostate	M	D3	Ken Pienta, M.D. University of Michigan Medical School	22	14.2543	13.7492	8.6096	9.41098	13.9415	3.04228	7.45529	9.18821	10.9709	0	0.558749	1.19918	1.72999	1.48886	0.00100339	6.92971	6.38334	12.2493	6.81505	5.47339	0	5.91423	0.0495685	5.88987	5.90075	14.6299	7.71426	10.6699	1.2814	11.8214	0.827243	0	1.35287	8.68509	3.31051	4.47306	1.43898
27P	KP00010	IMMC 31	Prostate	M	D3	Ken Pienta, M.D. University of Michigan Medical School	18	15.0959	13.7492	8.51824	9.48042	10.7256	8.91923	8.71566	9.18488	10.8143	3.57121	0.602984	1.38914	1.21513	0.0045688	6.25736	5.11671	0.00282195	0.0665183	6.3503	4.37407	9.22923	3.73291	0.176582	9.52703	5.52643	13.7621	7.60815	12.5727	0.567209	11.3597	3.944	5.61151	3.83342	8.99797	7.74242	5.9797	2.3089
28P	KP00017	IMMC 31	Prostate	M	D3	Ken Pienta, M.D. University of Michigan Medical School	42	14.1545	13.7492	5.91364	9.08876	9.14194	3.20574	9.39456	9.78524	10.9877	0	0.260968	0.133705	0.203525	0.0747526	4.54221	4.77755	4.152	0.204798	7.18803e-05	6.88024	8.87716	6.9657	0.0604746	9.69544	7.70598	15.4939	9.63639	11.1188	0.177818	11.2243	3.39194	0	0	8.47114	0.0160472	0.806866	1.85736
29P	KP00058	IMMC 31	Prostate	M	D3	Ken Pienta, M.D. University of Michigan Medical School	48	13.1261	13.7492	5.67227	12.1859	7.36695	6.49382	7.06309	9.02221	9.60212	0	0.0553546	1.04759	0.0259994	0.00622359	2.40856	4.91543	0.0752247	3.61962	4.45006	9.07079	0	9.26243	0.0205929	7.16308	6.01634	17.5167	8.69259	9.98719	4.00624	7.9886	2.74174	0	0	8.44813	0.070047	5.10182	3.88684
30P	KP00064	IMMC 31	Prostate	M	D3	Ken Pienta, M.D. University of Michigan Medical School	29	14.5817	13.7492	7.53056	10.2291	8.97827	8.97877	8.0168	9.54199	10.606	0.0299294	0.0548546	0.453269	0.139386	0.0400086	0	4.86444	0	3.55421	4.14636	2.37357	10.8494	7.17221	3.37386	3.71113	5.40121	12.421	8.00473	10.2468	0.884125	12.2238	2.95777	0	4.71294	9.58419	7.25025	5.02076	1.72278
31P	KP00066	IMMC 31	Prostate	M	D3	Ken Pienta, M.D. University of Michigan Medical School	17	15.2892	13.7492	7.86493	9.29391	8.32242	6.98703	7.5478	9.58174	11.2409	2.25953	1.92194	0.542368	0.14574	0.0466285	3.408	4.16219	10.4699	2.63296	6.11599	5.93955	9.71984	3.3056	0.0350838	6.56775	6.61263	15.3953	7.28713	10.2755	0.177693	9.82015	0.236619	0	2.6551	7.6412	0.454222	0	5.70594
1B	1003	IMMC 17	Breast	F	4	IMPATH Predictive Oncology, Los Angeles	3	15.2329	13.7492	2.5198	0.280981	6.48789	1.59118	6.70066	7.88217	11.9112	0	0.630262	0.94849	0.326431	0.0361738	0.0132058	0	0.824461	0.0700489	10.318	0.0711487	0	0.224199	0.00973539	0.430493	3.78523	3.71408	9.36956	7.43152	0.248015	8.5914	5.26346	0	0	8.60413	0	1.78558	3.34663
2B	1004	IMMC 17	Breast	F	4	IMPATH Predictive Oncology, Los Angeles	3	15.0961	13.7492	2.33288	2.69592	2.58127	6.72306	6.17932	8.76152	10.399	0	2.13887	0.618183	1.63299	0.582652	0	5.22109	2.58545	0.967354	7.72038	0.0917362	1.7752	1.98597	0.260625	4.46613	4.84745	3.81005	7.83071	5.74719	2.33039	7.71979	8.44301	0	0	8.94785	0.0508365	4.15762	4.09302
3B	1006	IMMC 17	Breast	F	4	IMPATH Predictive Oncology, Los Angeles	4	16.4755	13.7492	2.64008	4.27103	8.21887	8.9554	5.44934	10.0539	11.2437	0	0.707076	4.49843	0.232994	1.58064	3.58518	2.12529	2.15445	0.0271183	6.57904	0.210679	0.228065	1.47711	0.500025	0.0711515	1.21315	1.91986	8.60198	12.1255	3.71318	13.2285	4.86103	0	0.493193	9.26117	8.22274	4.0657	5.63083
4B	2440	IMMC 17	Breast	F	4	IMPATH Predictive Oncology, Los Angeles	3	17.4238	13.7492	4.77642	5.50744	8.63773	8.95384	6.93199	10.3403	13.2808	0	1.18002	1.62097	3.55771	0.0243098	5.55078	2.44202	3.40414	2.14353	11.8386	0.261428	0	0.915947	0.0168761	5.74653	4.7381	0	8.12287	13.0552	1.32258	13.2225	10.0079	0	1.22046	9.56295	7.87325	5.31798	7.31706
5B	27248	IMMC 17	Breast	F	4	IMPATH Predictive Oncology, Los Angeles	219	15.1804	13.7492	11.9401	12.2457	14.3344	7.63597	8.86468	9.80864	12.0978	8.39714	13.2723	16.1976	5.06859	7.897	5.42941	9.95125	11.7527	4.56819	9.82965	0.220462	0.00490498	2.54835	0.146751	5.07676	6.90665	1.15624	9.44181	11.5164	0.765707	9.5426	3.79849	3.33627	9.89514	11.1051	13.9561	12.0857	6.63808
6B	22488	IMMC 17	Breast	F	4	IMPATH Predictive Oncology, Los Angeles	46	13.7661	13.7492	7.67809	5.07499	6.8257	7.36761	5.93894	8.76008	10.1773	3.05678	0.218325	9.61671	10.9618	1.07481	4.94251	4.80145	9.50795	0.0591884	3.58525	0.0350758	0	3.05499	9.39179	0.0769767	1.58291	0	8.13301	12.2867	0.677852	12.2662	3.34214	0	5.29462	7.03265	11.0391	8.73904	2.72347
7B	7493	IMMC 17	Breast	F	4	IMPATH Predictive Oncology, Los Angeles	784	13.6725	13.7492	11.7797	12.2597	14.378	7.52864	8.05388	8.91718	10.3651	7.44866	0.146118	14.8212	5.16708	0.56572	11.5573	10.4684	11.308	3.63541	3.03765	0.072934	0.127216	1.18722	0.0165977	7.50049	6.86031	0	10.4733	10.3609	0.256928	10.9968	2.54826	0.263867	9.28975	9.36931	14.2582	9.43297	4.55215
8B	7176	IMMC 17	Breast	F	4	IMPATH Predictive Oncology, Los Angeles	24	15.1934	13.7492	5.94344	6.25474	6.62119	8.33486	6.91391	10.2758	9.99114	1.66666	0.121999	8.67629	0.12292	2.18162	5.11739	2.22515	7.97096	0.110903	2.3464	0.0366204	0	0.133924	0.388679	1.51006	1.10195	0	8.48061	12.0523	0.24805	11.649	1.7465	0.129349	1.74351	7.87622	10.2625	6.88171	4.29638
9B	30389	IMMC 17	Breast	F	4	IMPATH Predictive Oncology, Los Angeles	1	15.3529	13.7492	0.230926	0.0305131	5.299	8.75774	6.82478	10.1669	10.5848	0	0.140766	0.425481	0.126194	0.0865986	5.33509	5.12974	0.000106564	0.977834	5.74932	0.0670218	0.0629469	0.158181	0.000858947	3.54805	1.99196	0.340714	8.5215	12.8047	1.86057	12.3717	3.08861	0	0	8.31299	0	0	3.72318
10B	27162	IMMC 17	Breast	F	4	IMPATH Predictive Oncology, Los Angeles	2	14.4619	13.7492	0.223162	0.173847	7.10558	7.85805	4.17845	8.65626	10.0357	0	1.14684	0.00494329	0.0389991	0.000412727	2.20422	0	1.88403	0.0406991	7.12446	0.0301833	0	0.0559103	0.000586603	0.0953948	1.82065	0	8.81853	11.1687	0.19363	8.40104	6.20639	0	0	7.70705	6.88375	6.2906	0.495255
11B	27248	IMMC 17	Breast	F	4	IMPATH Predictive Oncology, Los Angeles	244	14.9481	13.7492	6.55773	8.08827	10.3578	7.70004	5.72543	9.17829	9.93127	4.78424	6.65177	11.5084	1.44309	3.78633	3.6323	4.77268	6.8973	0.55514	5.38026	0.0126348	0.000761989	0.0705943	0.0819705	3.28669	2.72061	0	6.80913	11.0131	0.166444	9.73386	1.62969	1.3761	5.10023	8.07244	9.15346	7.60792	4.84258
12B	1555	IMMC 17	Breast	F	4	IMPATH Predictive Oncology, Los Angeles	3	14.1303	13.7492	5.26202	6.007	8.96808	7.89543	8.85299	9.17621	9.31816	0	0.175309	4.75607	0.317464	0.0756209	5.79574	0	3.36949	5.51205	4.54822e-05	0.0920657	0	0.138528	0.284939	0.027419	0.0796836	0.597364	9.43493	10.53	0.363106	11.5925	0.854028	0	1.71958	8.33332	5.0341	8.15264	0.693285
13B	7178	IMMC 17	Breast	F	4	IMPATH Predictive Oncology, Los Angeles	13	14.9848	13.7492	7.10308	8.45538	6.38596	7.74236	5.55798	9.34339	10.0173	1.56832	0.195703	7.51046	1.49488	3.68641	5.86686	3.52918	9.68777	4.91733	2.21756	0.082529	0.414996	0.177043	0.00119818	1.81212	1.42262	0	8.43074	11.7864	0.236972	12.0706	0.525238	0	4.99628	7.85238	9.90385	7.29591	5.59529
1N	1210	NA	Normal Donor	F	NA	Immunicon's blood donor program	0	14.0701	13.7492	2.32544	0.957459	7.71753	7.53232	8.92459	9.49345	10.4675	0	0.177453	0.793034	0.240055	0.00584709	5.19506	5.30672	2.62627	0.117064	5.52057	0.0128255	0	0.100699	0.25196	1.08605	2.20431	0.621263	9.95993	9.13124	0.673095	10.7565	3.94576	0	0	8.17881	0.0258846	1.49076	0.263767
2N	1211	NA	Normal Donor	M	NA	Immunicon's blood donor program	0	15.8396	13.7492	3.16601	0.48128	12.3093	8.34353	10.4626	10.5223	11.8149	0	0.737225	1.368	0.540771	0.369575	6.81521	6.49768	0.030823	0.0421078	6.6859	0.472093	0	0.288707	0.436239	1.15185	1.04829	4.41518	11.0414	10.1028	1.488	11.7105	3.80868	0	0	9.65393	0.358596	10.168	3.52284
3N	1213	NA	Normal Donor	M	NA	Immunicon's blood donor program	0	14.1058	13.7492	0.416037	0.0562958	4.20448	7.03739	9.3482	10.0797	10.1008	0	0.385999	0.389191	0.0635054	0.343854	7.94696	2.70654	0	2.00871	5.35687	0.0641046	0	0.553244	0.109703	0.278234	0.262657	0.906113	10.0679	10.1481	0.0870841	8.9185	4.95739	0	0	8.73892	0.00212777	5.43664	6.53827
4N	1214	NA	Normal Donor	M	NA	Immunicon's blood donor program	0	12.2596	13.7492	0.453382	1.44349	8.2437	6.92952	8.02417	7.38203	9.36822	0	3.60113	0.0500975	0.276196	0.541252	5.26851	0.507917	0.000149068	0.212844	4.46785	0.103568	0	0.838047	0.0242927	0.0418172	0.175486	1.17922	9.50359	7.55836	0.38238	8.24387	4.63324	0.152222	0.832204	8.13864	1.47758	0	0.314424
5N	1216	NA	Normal Donor	M	NA	Immunicon's blood donor program	0	14.0118	13.7492	0.528801	0.136226	11.8173	7.34297	10.7295	8.99526	10.5962	0	0.30981	4.39656	0.0577635	0.0332473	3.75616	7.116	3.91699	0.0410659	8.93242	0.207971	0	0.260433	0.0026358	4.30821	0.30981	1.75449	10.3643	9.76973	0.509423	10.0063	3.31172	0	0	8.72599	0.00280519	9.65855	0.802648
6N	1218	NA	Normal Donor	M	NA	Immunicon's blood donor program	0	13.7478	13.7492	0.436932	0.0893731	4.4119	4.67329	8.55746	8.44176	9.00419	0	0.186778	0.233121	0.238583	2.52132	4.8349	0.465941	0.0024637	0.0478697	4.35384	0.0122766	0.0164164	0.896863	0.00350147	0.477537	0.208281	0.306041	9.83921	7.74666	0.336926	8.62671	3.89111	0.352964	2.84303	6.69955	0.0312849	0	1.58089
7N	1219	NA	Normal Donor	M	NA	Immunicon's blood donor program	0	13.6519	13.7492	0.28673	0.0737259	5.99773	3.76942	9.01068	9.29606	8.57309	0	0.139443	0.083546	0.0397096	0.00138495	2.94578	3.07031	3.42779	0.0870781	2.47523	0.0685829	0	1.09465	0.0302683	0.0762905	0.351	0.801553	10.2367	8.56748	0.615002	8.07378	2.43872	0	1.36206	6.88379	0.00712828	0	1.57593
8N	1220	NA	Normal Donor	F	NA	Immunicon's blood donor program	0	13.2008	13.7492	0.157931	0.123474	0.0258605	7.76534	8.17103	8.53884	8.88829	0	0.180088	0.199742	0.25975	0.0226762	4.1843	0	0.0102391	0.0282442	3.21536	0.0420406	0.277327	0.166835	0.168498	0.00869241	0.122902	5.84745	9.65489	8.84949	0.124617	8.41639	3.19102	0	0	8.00864	0.0285495	0	1.61715
9N	1221	NA	Normal Donor	M	NA	Immunicon's blood donor program	0	13.3733	13.7492	0.243615	0.0544077	0.244203	5.18302	8.22411	9.0094	8.67162	0	0.149413	0.0507137	0.0633684	0.0165526	3.68786	1.81769	1.52516	0.0108948	0.00916549	0.0329855	0	0.591645	0.0344826	0.440728	0.254166	1.15469	10.1217	8.73541	0.291069	8.36142	2.6119	0	0	7.24882	0.000511885	0.003291	5.9428
10N	1223	NA	Normal Donor	M	NA	Immunicon's blood donor program	0	13.164	13.7492	0.253209	0.148612	7.77826	5.78831	6.9037	7.27968	9.79219	0	0.332737	0.0434994	0.111671	0.00158522	3.0987	0	2.2569	0.235708	0.0277219	0.191002	1.53813	0.228647	0.0579118	0.35884	0.143929	1.28092	9.11568	8.60416	0.463289	9.31449	3.70759	0	0	6.90578	0	3.90942	4.27548
11N	1224	NA	Normal Donor	F	NA	Immunicon's blood donor program	0	13.4455	13.7492	0.315665	0.0118927	0.135221	5.60647	7.53504	8.75067	9.18192	0	0.0582847	0.0968336	0.10115	0.0735938	4.32429	0	0.00202484	0.0522787	0.00168628	0.0441569	0	0.141521	0.0633812	0.0997124	0.890988	0	9.41953	8.04421	0.182152	9.9949	0.413195	0	0.449756	6.79545	0.00446933	0.0011629	1.01435
12N	1231	NA	Normal Donor	F	NA	Immunicon's blood donor program	0	16.1968	13.7492	4.37186	2.18695	4.46188	7.55173	4.41757	10.6972	6.85768	0	3.22213	5.00534	2.71856	0.510873	0	2.77233	0	1.634	3.40912	2.15492	0	1.68349	1.78986	5.21888	4.41475	4.34253	10.2648	9.44178	6.42597	10.608	5.16629	0	0	2.39208	0	0	0
13N	1232	NA	Normal Donor	F	NA	Immunicon's blood donor program	0	14.2105	13.7492	0.654178	0.0652452	5.78119	4.51815	10.1723	9.77797	9.99183	0.254919	0.273202	0.957539	0.168872	0.01659	7.10223	0	3.68765	0.265916	5.40212	2.35729	0.598716	0.217644	0.116167	0.0798598	0.152768	0	10.4319	7.74018	0.515155	10.1221	5.37328	0	0	6.87026	0.0696451	0	4.98409
14N	1233	NA	Normal Donor	F	NA	Immunicon's blood donor program	0	15.9116	13.7492	1.51896	1.05162	6.48655	8.36439	9.63343	10.5408	9.96632	0	0.597514	1.23434	0.597514	0.0878161	4.34302	4.12893	5.12441	0.338209	2.51274	0.102136	4.90307	0.485745	0.135378	0.275908	2.16671	2.33621	10.8573	9.40876	1.47342	11.2067	0.765273	0.664662	0	8.20746	2.17486	2.61614	5.32546
15N	1234	NA	Normal Donor	F	NA	Immunicon's blood donor program	0	14.6619	13.7492	0.398909	0.338361	6.42166	7.85666	9.60188	10.6574	10.9808	0	0.260583	0.0947828	0.115108	0.00539874	6.77891	0	0.113339	0.0435328	0.237762	0.0784047	0	0.1938	0.00420607	0.347168	1.35579	0.0163411	10.5367	10.5715	0.462818	10.3826	6.40104	0	0	8.52964	0	4.81624	0.880975
16N	1235	NA	Normal Donor	M	NA	Immunicon's blood donor program	0	13.4214	13.7492	0.0827109	0.428452	7.09143	6.78085	7.55594	8.26386	10.0782	0	0.0749107	0.230463	0.0503701	0.0736066	3.57868	0	5.82884	0.0432812	4.09858	0.00939746	0.113074	0.0675049	0.00168784	0.0459436	0.0256297	0.23902	10.1137	10.5324	0.257898	10.5677	0.250223	0	0	8.4303	0.004752	3.41541	5.75423
17N	1236	NA	Normal Donor	F	NA	Immunicon's blood donor program	0	13.0792	13.7492	1.88797	1.78156	0.823444	6.3457	8.80375	8.37641	8.7427	0	0.137896	0.266735	0.056612	0.0325112	5.30037	0.21398	0.000442634	0.0411003	0.00131747	0.128098	0	0.0888963	0.159864	0.029356	0.0848494	4.20579	10.0859	9.05614	0.162426	7.57182	2.45645	0	0	4.80717	0	0	2.22016
18N	1237	NA	Normal Donor	F	NA	Immunicon's blood donor program	0	13.7735	13.7492	0.217258	5.70765	5.64207	6.11301	7.24954	8.95598	9.08814	0	0.164512	0.254551	0.261658	0.0203279	4.89568	0.0792454	4.47681e-05	0.00430046	0.0832628	0.0201882	0	0.107793	0.0565386	0.0772325	0.16388	1.81711	9.91598	8.71343	0.174589	9.05354	0.641308	0	0.0812555	7.61226	0.0179512	0	0.101864
19N	884	NA	Normal Donor	M	NA	Immunicon's blood donor program	0	13.6083	13.7492	1.12327	4.24383	1.00433	3.94805	7.62707	8.14626	7.99711	0	0.309504	0.51569	0.240486	0.0555247	4.36857	3.14316	0.000910993	0.660101	3.33377	0.111571	0	0.149881	0.0535589	2.89131	0.355199	0	10.0415	7.51485	0.592782	6.99578	3.68351	0	0	4.79485	0.0881912	0	1.77338
20N	888	NA	Normal Donor	F	NA	Immunicon's blood donor program	0	14.3486	13.7492	0.978145	0.247864	6.25835	5.06037	7.67611	8.61309	9.32238	0	0.864004	1.45469	1.11872	0.0547627	4.72949	2.91435	2.52805	0.799975	0.013069	0.142485	0.706721	0.891809	0.0570315	2.2343	0.956028	3.32062	9.64988	9.9741	1.25836	9.04411	1.72819	0	0	5.67613	1.99891	0	1.03488
21N	891	NA	Normal Donor	F	NA	Immunicon's blood donor program	0	16.0923	13.7492	1.82362	4.0152	8.07829	7.30423	9.70974	10.2265	10.8438	0	1.24659	1.86227	0.430092	0.144968	6.50977	2.92661	0.000241606	0.139584	5.87087	1.05018	0	1.24241	0.102248	0.521921	1.87312	0	10.6806	9.41794	1.84031	12.7247	2.02196	0	0	7.48092	2.84626	0	3.31081
22N	892	NA	Normal Donor	F	NA	Immunicon's blood donor program	0	17.3944	13.7492	4.56722	1.80659	8.59733	8.23739	10.1453	11.0372	11.8945	0	2.56776	3.8769	0.540993	0.163037	6.11366	0	0.602329	3.55366	1.64886	1.93293	0	3.66326	0.0464671	2.80365	2.48333	0	10.8806	11.3027	3.02139	12.497	4.29427	0	0	7.98014	0	0	4.65668
23N	919	NA	Normal Donor	F	NA	Immunicon's blood donor program	0	14.4067	13.7492	1.08735	0.562866	4.38585	6.20769	7.46776	8.63921	10.2411	0.634304	0.68106	1.6049	0.029063	0.0535773	4.12626	1.00153	0.0200708	0.974255	4.08918	0.0969836	1.27583	0.430472	0.0180325	0.370495	0.684124	0	9.50613	10.5821	1.41879	10.9757	1.96499	0	3.09304	6.87155	0	0	2.61185
24N	920	NA	Normal Donor	M	NA	Immunicon's blood donor program	0	13.9098	13.7492	1.06098	2.75647	0.884932	4.77422	8.18284	8.54752	8.89978	0	1.03737	1.66215	0.531551	0.0643177	4.52931	3.87036	0.206274	2.89933	5.84106	1.881	3.87293	0.38671	0.281177	1.51474	0.65603	0	10.654	7.02909	0.521113	5.59968	1.59033	0	0.728139	6.33528	0.00362985	3.43235	1.96041
25N	921	NA	Normal Donor	F	NA	Immunicon's blood donor program	0	13.7152	13.7492	0.466564	0.944263	5.30083	3.46764	8.62851	8.61308	8.91212	0	0.187978	0.584549	0.396592	0.00758201	5.1787	2.93976	0	0.169787	3.64546	0.0849652	0	0.216319	0.0350913	0.0762021	0.882309	1.45864	10.1458	7.39619	2.7915	6.16608	2.99246	0	0	6.19962	0.0050363	2.40109	0.780092
26N	922	NA	Normal Donor	F	NA	Immunicon's blood donor program	0	13.3797	13.7492	1.71151	0.44369	4.69184	4.83852	6.96727	8.32935	7.10022	0.0894924	0.377979	0.114136	0.033608	0.0219341	3.48712	0	1.76112	0.0530848	0.653383	0.153731	0	0.37616	0.196189	0.401409	0.365203	1.60687	9.1964	8.15036	0.549119	7.7438	0.484767	0	0	5.35241	0	0	0.419177
27N	923	NA	Normal Donor	M	NA	Immunicon's blood donor program	0	14.4326	13.7492	0.589592	0.760049	5.40025	6.09637	6.9327	8.59864	9.54683	0	0.940003	0.65664	0.691109	0.174147	4.08192	2.35573	1.30387	0.232392	3.60252	0.113822	0.000901043	0.156205	0.380894	0.152589	0.0715622	0	9.66744	10.1808	2.22699	10.0948	1.67539	1.06835	0.460055	6.58098	0.0349816	1.03601	2.51907
28N	927	NA	Normal Donor	M	NA	Immunicon's blood donor program	0	12.8597	13.7492	1.21564	0.335818	4.07655	3.41937	5.75925	7.14566	7.71549	0	0.153184	0.968328	0.289457	0.0884061	3.03987	0	3.24373e-05	0.216996	1.60195	0.0997349	0.50225	0.278422	1.12614	0.442772	0.198716	0	9.54747	9.78052	1.69973	7.2659	1.49706	1.6759	0	4.27201	0.00392939	0	0.669667
29N	928	NA	Normal Donor	M	NA	Immunicon's blood donor program	0	13.4446	13.7492	0.564433	1.3763	4.96541	6.32545	6.33753	9.05168	8.952	0	2.84075	1.08591	0.635155	0.044947	4.80354	0	0.00220164	0.173008	0.000490206	0.128669	0	0.398163	0.06482	0.130121	0.11938	0	10.4191	8.77956	0.484402	10.0107	0.171422	0	0	4.84211	0.0318035	0	0.627466
30N	929	NA	Normal Donor	M	NA	Immunicon's blood donor program	0	14.1948	13.7492	1.34925	5.03193	3.11276	6.40425	7.60147	9.18348	8.61062	0	0.751868	0.819697	0.908042	0.119869	5.053	0	1.61091	0.125911	0.0548601	0.285545	0	1.16921	0.432516	0.703314	2.50753	0	10.2907	9.21217	0.982066	9.67724	1.0041	0	0	5.93998	0.834118	0	5.46487
31N	944	NA	Normal Donor	M	NA	Immunicon's blood donor program	0	14.7783	13.7492	0.809565	2.66465	4.88276	6.23986	7.39909	9.78379	10.4573	0	0.206119	0.716664	0.336724	0.021202	4.62974	3.34868	0	3.72887	5.13251	0.267105	2.42922	0.240318	0.122042	0.132824	0.386437	0	9.26753	7.81373	0.444796	10.5199	3.1267	0	0	5.66428	0.00225386	1.44864	2.252
32N	945	NA	Normal Donor	F	NA	Immunicon's blood donor program	0	15.3547	13.7492	0.772384	1.2071	8.79758	5.33627	10.5291	10.054	10.2799	0	0.59164	0.278553	0.275273	0.0908846	6.46545	3.76461	0.000199925	0.633238	2.01104	0.438742	0	0.351087	0.0184053	0.183049	1.0962	2.06903	10.3554	8.87945	1.59171	9.81501	1.91944	0	0	6.02794	0	0	2.20456
33N	946	NA	Normal Donor	F	NA	Immunicon's blood donor program	0	14.6268	13.7492	1.28307	0.216292	1.74408	4.56417	9.397	8.72323	9.34077	0	0.747934	0.888142	0.135099	0.0473234	6.01639	4.38855	0.0110628	0.332252	5.16608	5.13059	0	0.547188	0.263126	0.271717	0.871036	0	10.3627	8.59073	0.928859	9.9802	0.954607	0	0	5.39275	0	0	2.70401
34N	947	NA	Normal Donor	F	NA	Immunicon's blood donor program	0	15.844	13.7492	2.51533	0.0681014	9.5775	5.07459	10.2447	10.7559	10.8489	0	0.957668	2.00872	0.171551	0.0912147	7.00776	5.23171	0.837603	1.54878	0.00639985	0.60732	0	0.582631	0.363917	1.0578	1.03614	4.89825	11.0875	8.08207	2.32379	10.0927	1.44987	0	0	8.01084	0	0	1.64134
35N	949	NA	Normal Donor	M	NA	Immunicon's blood donor program	0	12.4509	13.7492	0.93535	0.0262806	3.99194	3.10007	7.5633	7.27003	7.30431	0	0.778128	0.488937	0.105109	0.00475619	4.19329	0.960806	5.22335	0.111942	0.00212261	0.219411	1.13975	0.526928	1.19764	0.0468707	0.387462	0	9.67991	6.92456	0.514948	6.78923	1.8222	0	0	5.35518	0.0100334	0	3.4628
36N	951	NA	Normal Donor	F	NA	Immunicon's blood donor program	0	14.9273	13.7492	2.60756	0.0954201	7.39966	3.77645	7.56354	8.10175	10.3639	0	0.810774	1.72802	0.740157	0.545173	4.10624	0.190438	0.00028914	0.25183	4.68948	0.305248	0	0.824492	0.00829337	0.240005	1.957	2.25928	8.66019	6.3304	1.1914	7.36459	1.14623	0	0	3.787	2.89442	1.05375	2.37566
37N	952	NA	Normal Donor	F	NA	Immunicon's blood donor program	0	14.3648	13.7492	0.565095	0.131656	9.69225	5.91044	8.26439	8.87176	9.64381	0	0.443656	0.812657	0.694179	0.154722	4.77962	4.09577	0.460087	0.140746	4.16005	0.205634	1.26638	0.34093	0.280532	0.103807	1.10856	0	9.18691	9.1221	0.747214	10.3946	1.89439	0	0.348795	6.7085	0.329051	4.17809	2.06524
38N	953	NA	Normal Donor	M	NA	Immunicon's blood donor program	0	13.6086	13.7492	1.00777	0.0252489	6.78479	5.71537	8.37153	9.40084	8.99538	0	0.652437	0.834798	0.526969	0.0781205	4.99032	2.88598	1.19411	0.199679	2.87466	0.427212	0	0.2421	0.0741682	0.244681	0.528896	0	9.96713	8.69831	0.825423	8.81139	2.70187	0	0	6.41366	0	0.867136	2.38307
39N	954	NA	Normal Donor	M	NA	Immunicon's blood donor program	0	12.5946	13.7492	0.230535	0.0869234	5.00879	1.9946	5.33135	6.71989	8.04561	0	0.050105	0.173741	0.00568133	0.00322875	3.60951	0	1.8216e-05	0.0366555	0.00656856	0.040896	0	0.0483349	0.00261619	0.0756944	0.0971405	0	8.9447	8.11221	0.299326	7.06679	0.890908	0	0.797167	4.99053	0.00538546	0	2.11147
40N	955	NA	Normal Donor	F	NA	Immunicon's blood donor program	0	13.6596	13.7492	0.374615	0.090273	3.28892	3.67603	6.67679	7.76172	8.60375	0	0.297566	0.236424	0.315715	0.124194	2.84409	0	0.00483059	0.0757918	3.95946	0.146899	0	0.211869	0.0439687	0.202145	0.0731863	0	9.01366	9.20398	0.585438	8.7897	1.18861	0	0	6.83982	0.0800453	1.28899	1.18313
41N	956	NA	Normal Donor	M	NA	Immunicon's blood donor program	0	14.314	13.7492	0.43534	0.121755	7.24404	4.47554	6.35001	8.60956	9.52569	0	0.918873	0.656402	0.098212	0.349633	0.538903	0.183785	0.000754783	0.246321	0.0174976	0.0241164	0	0.170946	0.0118206	0.0529188	1.73432	0	9.31347	7.84612	0.792551	10.3563	1.0154	0	0	6.81111	0	0	4.4417
42N	957	NA	Normal Donor	M	NA	Immunicon's blood donor program	0	13.9953	13.7492	0.483127	0.0503029	6.51143	6.24586	7.40536	8.59184	9.68604	0	0.459719	0.358646	0.202028	0.00278548	4.03288	2.20464	0.95204	0.114938	3.29489	0.273336	0.945926	0.189146	0.0189059	0.27821	0.189146	0	9.73548	9.25524	0.746697	8.75367	0.331939	2.24565	0	5.40817	0.0203612	0	3.25836
43N	958	NA	Normal Donor	M	NA	Immunicon's blood donor program	0	14.1287	13.7492	1.03763	0.414871	2.67105	5.83512	9.2165	9.10494	9.75268	0.437358	1.18625	0.826173	0.055501	0.0788345	4.98511	3.08445	1.9399	0.184125	1.4702	0.283379	1.42897	0.253738	0.139938	0.127671	0.435328	0	10.3974	9.45597	0.738346	8.70053	0.451487	0	0	6.77029	0	0	2.87576
44N	959	NA	Normal Donor	F	NA	Immunicon's blood donor program	0	13.8859	13.7492	0.84812	0.344528	5.43953	5.95226	8.27089	9.20864	9.05538	0	0.375056	0.823243	0.152762	0.0147071	5.78944	4.13457	2.31692	0.0117828	0.00534411	0.0563431	0	0.171203	0.160961	0.313339	0.572377	0	10.3932	8.6517	1.12454	8.79794	1.20604	0	0	5.05727	0.340408	0	1.98214
45N	960	NA	Normal Donor	F	NA	Immunicon's blood donor program	0	15.4058	13.7492	2.04942	0.268346	6.29626	5.651	9.17337	10.0597	10.2494	0	1.30266	1.3181	0.124681	0.0380822	5.88125	0	3.04169	0.453853	5.57871	1.80828	0.977489	1.16425	0.0802659	0.214897	1.96119	0	9.66605	7.35179	2.02845	10.4692	1.84072	0	0.829083	5.38837	0	0	3.86195
46N	965	NA	Normal Donor	M	NA	Immunicon's blood donor program	0	15.746	13.7492	2.31015	1.45812	9.90788	6.08676	8.80741	10.3233	11.3782	0	1.12787	1.67791	1.56923	0.0192639	7.27248	6.02312	0	0.344905	0.0109419	2.74564	0	1.28082	1.56923	0.879338	1.19101	0	10.9603	9.58417	1.82449	11.8542	3.49846	0	0	8.97479	0.068851	0	2.72712
47N	966	NA	Normal Donor	F	NA	Immunicon's blood donor program	0	13.4049	13.7492	0.915478	0.190843	7.75784	4.37746	8.99346	8.41744	8.94821	0	0.317926	0.468683	0.497927	1.66876	4.94996	5.14113	0.000130818	0.539433	0.0120655	0.272803	0	0.675966	0.654876	1.22626	0.604433	2.17107	10.3711	8.81921	1.89945	7.71196	1.62966	0	0	7.94322	0.00467532	0	3.89583
48N	967	NA	Normal Donor	M	NA	Immunicon's blood donor program	0	13.8784	13.7492	0.95454	0.861688	5.84645	4.84836	7.8705	8.19429	8.82577	0	0.272858	1.20037	0.246312	0.0169178	6.04478	0	4.13469e-05	0.215448	0.0820269	0.196488	0	0.336756	0.0987171	0.243428	0.526627	0	9.9556	9.21236	0.662363	4.34873	1.89681	0	0	6.54313	0.0706834	4.33186	1.60039
49N	968	NA	Normal Donor	F	NA	Immunicon's blood donor program	0	14.0061	13.7492	0.521107	0.0736616	5.77194	6.31212	8.00829	8.97272	8.95906	0	0.0799366	0.672102	0.593636	0.0335513	5.62395	2.96203	0	0.00662422	4.13412	0.178115	1.16544	1.8077	0.0435286	2.12892	0.417823	0	9.99884	7.60973	0.408203	8.37664	2.72429	0	0	7.19468	0	0.0276992	1.16734
50N	970	NA	Normal Donor	M	NA	Immunicon's blood donor program	0	12.6105	13.7492	0.857999	0.200665	5.09705	4.00421	8.02844	8.09748	8.11121	0	0.170802	0.325547	0.662111	0.0590462	1.39914	2.70945	0.00185036	0.0474781	1.55067	0.123996	0	0.31942	0.159643	0.0533968	0.31121	0	8.85345	6.63217	0.609519	6.8914	3.31831	0	0	5.05849	0	0	0.934822
						COLON MIN	1
						COLON MAX	105
						COLON MEAN	8.33333
						COLON MEDIAN	3
						PROSTATE MIN	3
						PROSTATE MAX	121
						PROSTATE MEAN	20.7419
						PROSTATE MEDIAN	12
						BREAST MIN	1
						BREAST MAX	784
						BREAST MEAN	103.769
						BREAST MEDIAN	4

## Sheet: C) Kruskal-Wallis Test
Gene Symbol	Chi-Square	Degrees of Freedom	Asymptotic Significance
KLK3	50.8861	3	<0.01
KRT19	48.7833	3	<0.01
CEACAM5	47.135	3	<0.01
TST	46.8891	3	<0.01
S100A16	45.0621	3	<0.01
S100A13	43.9781	3	<0.01
ADAM28*	42.6441	3	<0.01
S100A14	41.9633	3	<0.01
AGR2	38.4295	3	<0.01
ASGR2	37.0183	3	<0.01
KRT20	36.3706	3	<0.01
FABP1	33.7564	3	<0.01
SCGB2A2	30.3451	3	<0.01
SIL1	29.626	3	<0.01
AR	27.7442	3	<0.01
HPN	26.6962	3	<0.01
MARCO	24.3538	3	<0.01
KLK2	22.1505	3	<0.01
TFF3	21.4459	3	<0.01
SCGB2A1	20.8802	3	<0.01
VIL1	20.8552	3	<0.01
SLC2A10	20.4069	3	<0.01
PIP	18.0258	3	<0.01
MSMB	17.4237	3	<0.01
MAOB	14.9328	3	<0.01
BACE2*	14.5357	3	<0.01
DDC	13.5348	3	<0.01
ACTB	12.2398	3	0.00660541
VEGF	11.7044	3	0.00846731
ICT1	11.2698	3	0.0103529
TFAPB2	9.92894	3	0.0191799
CYP4B1	9.81502	3	0.0202057
S100A7	8.55265	3	0.0358697
CLSP	7.4209	3	0.0596261
NPY	6.37786	3	0.094606
ESR1	4.63864	3	0.200253
RPS27A	0	3	1
* higher expression in samples from "normal" donors compared to cancer patient samples
